# Supplementary material for: Mitochondrial DNA Haplogroups and Variants Predispose to Chagas Disease Cardiomyopathy
Source: MDPI journal article supplement (doi:10.3390/hearts4040013), 2023-12-05
Supplement: s1 [file s1]

**Supplementary Table S1:** Heart tissue samples used for mitochondria quantification.

| Heart tissue samples | Phenotype | Sex | Age | EF   |
|----------------------|-----------|-----|-----|------|
| 09H3557              | control   |     |     |      |
| EMBT                 | control   | M   | 25  |      |
| ESS                  | control   |     |     |      |
| FJR                  | control   | M   | 28  |      |
| MBFM                 | control   | M   | 17  |      |
| ZFS                  | control   | M   |     |      |
| AAF2                 | CCC       | M   | 60  | 0.35 |
| ABG                  | CCC       | F   | 64  | 0.30 |
| ABS                  | CCC       | M   | 61  | 0.21 |
| APA                  | CCC       | F   | 60  | 0.20 |
| ATL                  | CCC       | M   | 41  | 0.19 |
| BHAN                 | CCC       | M   | 15  | 0.17 |
| EAS                  | CCC       | M   | 28  | 0.29 |
| EBS                  | CCC       | M   | 32  | 0.12 |
| ECA                  | CCC       | F   | 32  | 0.19 |
| EPG                  | CCC       | M   | 41  | 0.23 |
| GMS                  | CCC       | M   | 58  | 0.20 |
| HBO                  | CCC       | M   | 36  | 0.25 |
| ISM                  | CCC       | M   | 39  | 0.20 |
| JAB                  | CCC       | M   | 41  | 0.55 |
| JMS                  | CCC       | M   | 50  | 0.25 |
| JRJ                  | CCC       | M   | 51  | 0.23 |
| LAL                  | CCC       | M   | 58  | 0.29 |
| LMS                  | CCC       | M   | 58  | 0.28 |
| LRJ                  | CCC       | F   | 66  | 0.25 |
| MCRS                 | CCC       | F   | 45  | 0.20 |
| MDSS                 | CCC       | F   | 60  | 0.24 |
| MERS                 | CCC       | F   | 39  | 0.20 |
| MGAF                 | CCC       | M   | 51  | 0.35 |
| MGS                  | CCC       | F   | 61  | 0.15 |
| MLM                  | CCC       | F   | 47  | 0.35 |
| MSS                  | CCC       | F   | 46  | 0.20 |
| NDL                  | CCC       | F   | 61  | 0.27 |
| NSR                  | CCC       | F   | 49  | 0.15 |
| OMG                  | CCC       | M   | 49  | 0.21 |
| PAD                  | CCC       | M   | 62  | 0.21 |
| PMG                  | CCC       | M   | 57  | 0.29 |

|     |     |   |    |      |
|-----|-----|---|----|------|
| SCS | CCC | M | 59 | 0.17 |
| ZMC | CCC | F | 54 | 0.36 |

---

**EF:** Heart Ejection Fraction

2

**Supplementary Table S2:** Blood DNAs samples used for mitochondria quantification.

3

| Blood samples | Phenotype | Sub-phenotype | Sex | Age | EF   |
|---------------|-----------|---------------|-----|-----|------|
| DP100         | ASY       | ASY           | F   | 42  | 0.63 |
| DP123         | ASY       | ASY           | F   | 51  | 0.57 |
| DP130         | ASY       | ASY           | F   | 59  | 0.63 |
| DP135         | ASY       | ASY           | M   | 51  | 0.66 |
| DP136         | ASY       | ASY           | F   | 48  | 0.64 |
| DP139         | ASY       | ASY           | M   | 54  | 0.70 |
| DP141         | ASY       | ASY           | M   | 48  | 0.73 |
| DP142         | ASY       | ASY           | F   | 58  | 0.72 |
| DP163         | ASY       | ASY           | F   | 55  | 0.69 |
| DP164         | ASY       | ASY           | F   | 57  | 0.60 |
| DP166         | ASY       | ASY           | F   | 59  | 0.64 |
| DP167         | ASY       | ASY           | F   | 41  | 0.63 |
| DP174         | ASY       | ASY           | M   | 58  | 0.82 |
| DP179         | ASY       | ASY           | M   | 58  | 0.68 |
| DP181         | ASY       | ASY           | F   | 51  | 0.75 |
| DP182         | ASY       | ASY           | F   | 54  | 0.62 |
| DP184         | ASY       | ASY           | M   | 60  | 0.73 |
| DP200         | ASY       | ASY           | F   | 55  | 0.63 |
| DP229         | ASY       | ASY           | F   | 57  | 0.67 |
| DP63          | ASY       | ASY           | F   | 47  | 0.70 |
| DP80          | ASY       | ASY           | F   | 59  | 0.68 |
| IC100EI       | ASY       | ASY           | F   | 53  | 0.69 |
| IC103EI       | ASY       | ASY           | F   | 60  | 0.64 |
| IC105EI       | ASY       | ASY           | F   | 56  | 0.74 |
| IC106EI       | ASY       | ASY           | M   | 44  | 0.55 |
| IC107EI       | ASY       | ASY           | F   | 57  | 0.65 |
| IC110EI       | ASY       | ASY           | M   | 57  | 0.66 |

|         |     |     |   |    |      |
|---------|-----|-----|---|----|------|
| IC111EI | ASY | ASY | F | 42 | 0.63 |
| IC112EI | ASY | ASY | F | 54 | 0.67 |
| IC112EI | ASY | ASY | F | 54 | 0.67 |
| IC114EI | ASY | ASY | F | 53 | 0.60 |
| IC115EI | ASY | ASY | F | 57 | 0.65 |
| IC115EI | ASY | ASY | F | 57 | 0.65 |
| IC116EI | ASY | ASY | M | 51 | 0.62 |
| IC117EI | ASY | ASY | M | 53 | 0.62 |
| IC117EI | ASY | ASY | M | 53 | 0.62 |
| IC120EI | ASY | ASY | F | 42 | 0.65 |
| IC121EI | ASY | ASY | M | 44 | 0.64 |
| IC122EI | ASY | ASY | F | 59 | 0.55 |
| IC123EI | ASY | ASY | M | 42 | 0.57 |
| IC127EI | ASY | ASY | M | 53 | 0.60 |
| IC132EI | ASY | ASY | M | 42 | 0.59 |
| IC133EI | ASY | ASY | F | 56 | 0.67 |
| IC134EI | ASY | ASY | M | 44 | 0.70 |
| IC135EI | ASY | ASY | F | 46 | 0.58 |
| IC137EI | ASY | ASY | M | 41 | 0.65 |
| IC143EI | ASY | ASY | M | 54 | 0.65 |
| IC144EI | ASY | ASY | F | 42 | 0.64 |
| IC147EI | ASY | ASY | F | 44 | 0.66 |
| IC157EI | ASY | ASY | M | 60 | 0.66 |
| IC158EI | ASY | ASY | M | 41 | 0.66 |
| IC162EI | ASY | ASY | F | 46 | 0.61 |
| IC164EI | ASY | ASY | F | 56 | 0.63 |
| IC166EI | ASY | ASY | M | 43 | 0.60 |
| IC169EI | ASY | ASY | F | 60 | 0.62 |
| IC170EI | ASY | ASY | M | 52 | 0.64 |
| IC171EI | ASY | ASY | M | 48 | 0.61 |
| IC176EI | ASY | ASY | M | 43 | 0.65 |
| IC177EI | ASY | ASY | M | 48 | 0.64 |
| IC182EI | ASY | ASY | M | 57 | 0.60 |
| IC184EI | ASY | ASY | F | 47 | 0.68 |

|         |     |     |   |    |      |
|---------|-----|-----|---|----|------|
| IC189EI | ASY | ASY | F | 57 | 0.65 |
| IC192EI | ASY | ASY | F | 50 | 0.65 |
| IC193EI | ASY | ASY | F | 48 | 0.67 |
| IC195EI | ASY | ASY | M | 45 | 0.65 |
| IC197EI | ASY | ASY | M | 54 | 0.63 |
| IC208EI | ASY | ASY | F | 44 | 0.64 |
| IC20EI  | ASY | ASY | F | 58 | 0.75 |
| IC211EI | ASY | ASY | F | 43 | 0.67 |
| IC221EI | ASY | ASY | M | 47 | 0.59 |
| IC224EI | ASY | ASY | M | 47 | 0.59 |
| IC225EI | ASY | ASY | F | 53 | 0.65 |
| IC226EI | ASY | ASY | M | 43 | 0.70 |
| IC229EI | ASY | ASY | F | 44 | 0.60 |
| IC231EI | ASY | ASY | M | 43 | 0.59 |
| IC237EI | ASY | ASY | F | 46 | 0.60 |
| IC240EI | ASY | ASY | F | 51 | 0.62 |
| IC241EI | ASY | ASY | M | 48 | 0.55 |
| IC253EI | ASY | ASY | F | 41 | 0.62 |
| IC255E  | ASY | ASY | F | 51 | 0.66 |
| IC255EI | ASY | ASY | F | 44 | 0.65 |
| IC257EI | ASY | ASY | F | 48 | 0.66 |
| IC258EI | ASY | ASY | F | 47 | 0.62 |
| IC25EI  | ASY | ASY | M | 49 | 0.76 |
| IC261E  | ASY | ASY | F | 45 | 0.66 |
| IC262EI | ASY | ASY | M | 51 | 0.63 |
| IC265EI | ASY | ASY | F | 56 | 0.60 |
| IC269EI | ASY | ASY | M | 46 | 0.59 |
| IC26EI  | ASY | ASY | F | 60 | 0.75 |
| IC270EI | ASY | ASY | F | 51 | 0.65 |
| IC276EI | ASY | ASY | F | 47 | 0.65 |
| IC279EI | ASY | ASY | M | 49 | 0.68 |
| IC281EI | ASY | ASY | F | 50 | 0.63 |
| IC283EI | ASY | ASY | F | 49 | 0.58 |
| IC284EI | ASY | ASY | M | 45 | 0.63 |

|         |     |     |   |    |      |
|---------|-----|-----|---|----|------|
| IC285EI | ASY | ASY | M | 53 | 0.60 |
| IC287EI | ASY | ASY | M | 54 | 0.55 |
| IC292EI | ASY | ASY | F | 53 | 0.65 |
| IC311EI | ASY | ASY | M | 56 | 0.55 |
| IC312EI | ASY | ASY | M | 44 | 0.63 |
| IC314EI | ASY | ASY | M | 42 | 0.58 |
| IC318EI | ASY | ASY | M | 50 | 0.61 |
| IC328EI | ASY | ASY | M | 46 | 0.63 |
| IC329EI | ASY | ASY | M | 59 | 0.65 |
| IC332EI | ASY | ASY | M | 46 | 0.67 |
| IC336EI | ASY | ASY | M | 59 | 0.60 |
| IC337EI | ASY | ASY | F | 47 | 0.62 |
| IC341EI | ASY | ASY | M | 43 | 0.55 |
| IC343EI | ASY | ASY | F | 51 | 0.65 |
| IC345EI | ASY | ASY | F | 54 | 0.60 |
| IC34EI  | ASY | ASY | M | 49 | 0.68 |
| IC351EI | ASY | ASY | M | 42 | 0.63 |
| IC352EI | ASY | ASY | F | 59 | 0.67 |
| IC357EI | ASY | ASY | F | 47 | 0.65 |
| IC359EI | ASY | ASY | M | 44 | 0.62 |
| IC362EI | ASY | ASY | F | 58 | 0.64 |
| IC364EI | ASY | ASY | F | 50 | 0.61 |
| IC367EI | ASY | ASY | M | 55 | 0.50 |
| IC369EI | ASY | ASY | F | 54 | 0.65 |
| IC373EI | ASY | ASY | M | 50 | 0.64 |
| IC380EI | ASY | ASY | F | 57 | 0.65 |
| IC382EI | ASY | ASY | F | 45 | 0.60 |
| IC383EI | ASY | ASY | F | 58 | 0.60 |
| IC389EI | ASY | ASY | M | 46 | 0.64 |
| IC393EI | ASY | ASY | F | 47 | 0.65 |
| IC395EI | ASY | ASY | F | 50 | 0.60 |
| IC398EI | ASY | ASY | M | 45 | 0.60 |
| IC399EI | ASY | ASY | F | 53 | 0.61 |
| IC39EI  | ASY | ASY | F | 57 | 0.70 |

|         |     |     |   |    |      |
|---------|-----|-----|---|----|------|
| IC404EI | ASY | ASY | F | 59 | 0.61 |
| IC405EI | ASY | ASY | F | 58 | 0.55 |
| IC407EI | ASY | ASY | F | 48 | 0.59 |
| IC408EI | ASY | ASY | F | 50 | 0.58 |
| IC413EI | ASY | ASY | F | 53 | 0.65 |
| IC414EI | ASY | ASY | M | 46 | 0.58 |
| IC49EI  | ASY | ASY | F | 56 | 0.70 |
| IC57EI  | ASY | ASY | F | 40 | 0.71 |
| IC66EI  | ASY | ASY | M | 51 | 0.53 |
| IC67EI  | ASY | ASY | F | 59 | 0.65 |
| IC68EI  | ASY | ASY | F | 51 | 0.75 |
| IC68EI  | ASY | ASY | F | 51 | 0.75 |
| IC6EI   | ASY | ASY | F | 53 | 0.71 |
| IC88EI  | ASY | ASY | F | 46 | 0.82 |
| IC89EI  | ASY | ASY | F | 50 | 0.69 |
| IC95EI  | ASY | ASY | F | 57 | 0.70 |
| IC96EI  | ASY | ASY | F | 59 | 0.69 |
| IC97EI  | ASY | ASY | F | 57 |      |
| IC98EI  | ASY | ASY | F | 58 | 0.77 |
| IC99EI  | ASY | ASY | F | 43 | 0.62 |
| PR02    | ASY | ASY | F | 53 | 0.77 |
| PR06    | ASY | ASY | F | 43 | 0.69 |
| PR101   | ASY | ASY | M | 47 | 0.60 |
| PR104   | ASY | ASY | F | 58 | 0.78 |
| PR107   | ASY | ASY | F | 43 | 0.68 |
| PR111   | ASY | ASY | M | 48 | 0.73 |
| PR112   | ASY | ASY | F | 60 | 0.73 |
| PR113   | ASY | ASY | F | 59 | 0.73 |
| PR115   | ASY | ASY | M | 60 | 0.62 |
| PR127   | ASY | ASY | M | 56 | 0.69 |
| PR131   | ASY | ASY | M | 60 | 0.62 |
| PR139   | ASY | ASY | F | 53 | 0.71 |
| PR141   | ASY | ASY | M | 60 | 0.76 |
| PR145   | ASY | ASY | F | 58 | 0.66 |

|       |     |     |   |    |      |
|-------|-----|-----|---|----|------|
| PR148 | ASY | ASY | F | 53 | 0.70 |
| PR149 | ASY | ASY | F | 60 | 0.77 |
| PR16  | ASY | ASY | M | 58 | 0.63 |
| PR163 | ASY | ASY | F | 58 | 0.73 |
| PR166 | ASY | ASY | F | 52 | 0.68 |
| PR177 | ASY | ASY | M | 43 | 0.69 |
| PR18  | ASY | ASY | F | 52 | 0.70 |
| PR181 | ASY | ASY | F | 52 | 0.76 |
| PR183 | ASY | ASY | F | 57 | 0.64 |
| PR185 | ASY | ASY | M | 40 | 0.67 |
| PR189 | ASY | ASY | M | 58 | 0.58 |
| PR191 | ASY | ASY | F | 55 | 0.77 |
| PR194 | ASY | ASY | F | 60 | 0.78 |
| PR195 | ASY | ASY | F | 51 | 0.65 |
| PR197 | ASY | ASY | F | 55 | 0.73 |
| PR202 | ASY | ASY | F | 55 | 0.80 |
| PR203 | ASY | ASY | F | 40 | 0.73 |
| PR42  | ASY | ASY | F | 59 | 0.72 |
| PR49  | ASY | ASY | M | 50 | 0.62 |
| PR58  | ASY | ASY | M | 55 | 0.69 |
| PR63  | ASY | ASY | F | 47 | 0.76 |
| PR77  | ASY | ASY | F | 54 | 0.73 |
| PR89  | ASY | ASY | F | 54 | 0.75 |
| RP06I | ASY | ASY | M | 42 | 0.65 |
| RP18I | ASY | ASY | M | 41 | 0.65 |
| RP21I | ASY | ASY | M | 47 | 0.55 |
| RP21I | ASY | ASY | M | 47 | 0.55 |
| RP23I | ASY | ASY | F | 57 | 0.50 |
| RP25I | ASY | ASY | M | 49 |      |
| RP25I | ASY | ASY | M | 49 | 0.57 |
| RP26I | ASY | ASY | M | 46 | 0.68 |
| RP30I | ASY | ASY | F | 48 | 0.50 |
| UB08I | ASY | ASY | F | 47 |      |
| UB14I | ASY | ASY | F | 49 |      |

|         |     |              |   |    |      |
|---------|-----|--------------|---|----|------|
| UB167   | ASY | ASY          | F | 51 | 0.66 |
| UB169   | ASY | ASY          | M | 41 |      |
| UB194   | ASY | ASY          | M | 41 | 0.67 |
| UB195   | ASY | ASY          | F | 47 | 0.77 |
| UB200   | ASY | ASY          | F | 43 | 0.75 |
| UB219   | ASY | ASY          | M | 51 | 0.50 |
| UB242   | ASY | ASY          | F | 51 | 0.58 |
| UB255   | ASY | ASY          | F | 48 | 0.71 |
| UB263   | ASY | ASY          | F | 56 | 0.60 |
| UB269   | ASY | ASY          | F | 53 |      |
| UB35I   | ASY | ASY          | F | 56 |      |
| UB44I   | ASY | ASY          | F | 48 |      |
| DP102   | CCC | Moderate CCC | M | 43 | 0.52 |
| DP104   | CCC | Moderate CCC | F | 43 | 0.44 |
| DP113   | CCC | Moderate CCC | M | 44 | 0.53 |
| DP114   | CCC | Moderate CCC | F | 44 | 0.72 |
| DP122   | CCC | Moderate CCC | F | 42 | 0.69 |
| DP221   | CCC | Moderate CCC | M | 46 | 0.44 |
| DP221   | CCC | Moderate CCC | M | 46 | 0.44 |
| DP221   | CCC | Moderate CCC | M | 46 | 0.44 |
| DP88    | CCC | Moderate CCC | M | 58 | 0.67 |
| DP91    | CCC | Moderate CCC | M | 59 | 0.57 |
| DP92    | CCC | Moderate CCC | F | 50 | 0.61 |
| DP95    | CCC | Moderate CCC | F | 44 | 0.67 |
| DP96    | CCC | Moderate CCC | F | 54 | 0.42 |
| IC01MM  | CCC | Moderate CCC | M | 55 | 0.66 |
| IC02MM  | CCC | Moderate CCC | F | 60 | 0.50 |
| IC03MM  | CCC | Moderate CCC | F | 57 | 0.69 |
| IC06MM  | CCC | Moderate CCC | F | 55 | 0.50 |
| IC06MM  | CCC | Moderate CCC | F | 55 | 0.50 |
| IC106EC | CCC | Moderate CCC | M | 58 | 0.43 |
| IC107MM | CCC | Moderate CCC | M | 47 | 0.45 |
| IC108MM | CCC | Moderate CCC | F | 59 | 0.59 |
| IC109MM | CCC | Moderate CCC | F | 59 | 0.52 |



|         |     |          |     |   |    |      |
|---------|-----|----------|-----|---|----|------|
| IC10MM  | CCC | Moderate | CCC | M | 40 | 0.58 |
| IC10MM  | CCC | Moderate | CCC | M | 40 | 0.58 |
| IC117MM | CCC | Moderate | CCC | F | 43 | 0.69 |
| IC118MM | CCC | Moderate | CCC | M | 56 | 0.65 |
| IC120MM | CCC | Moderate | CCC | M | 48 | 0.56 |
| IC122EC | CCC | Moderate | CCC | F | 49 | 0.70 |
| IC129MM | CCC | Moderate | CCC | M | 54 | 0.45 |
| IC13MM  | CCC | Moderate | CCC | F | 50 | 0.60 |
| IC13MM  | CCC | Moderate | CCC | F | 50 | 0.60 |
| IC156EC | CCC | Moderate | CCC | F | 59 | 0.68 |
| IC15MM  | CCC | Moderate | CCC | F | 54 | 0.66 |
| IC15MM  | CCC | Moderate | CCC | F | 54 | 0.66 |
| IC169EC | CCC | Moderate | CCC | F | 52 | 0.73 |
| IC16EC  | CCC | Moderate | CCC | M | 54 | 0.43 |
| IC16EC  | CCC | Moderate | CCC | M | 54 | 0.43 |
| IC16EC  | CCC | Moderate | CCC | M | 54 | 0.43 |
| IC16MM  | CCC | Moderate | CCC | F | 58 | 0.59 |
| IC171EC | CCC | Moderate | CCC | M | 57 | 0.56 |
| IC172EC | CCC | Moderate | CCC | F | 45 | 0.58 |
| IC173EC | CCC | Moderate | CCC | M | 50 | 0.69 |
| IC177EC | CCC | Moderate | CCC | M | 51 | 0.56 |
| IC184EC | CCC | Moderate | CCC | M | 49 | 0.63 |
| IC186EC | CCC | Moderate | CCC | F | 54 | 0.55 |
| IC190EC | CCC | Moderate | CCC | F | 50 | 0.69 |
| IC202EC | CCC | Moderate | CCC | F | 40 | 0.67 |
| IC204EC | CCC | Moderate | CCC | F | 55 | 0.57 |
| IC205EC | CCC | Moderate | CCC | M | 56 | 0.42 |
| IC20MM  | CCC | Moderate | CCC | F | 60 | 0.45 |
| IC20MM  | CCC | Moderate | CCC | F | 60 | 0.45 |
| IC211EC | CCC | Moderate | CCC | M | 44 | 0.63 |
| IC212EC | CCC | Moderate | CCC | M | 51 | 0.61 |
| IC213EC | CCC | Moderate | CCC | F | 46 | 0.46 |
| IC214EC | CCC | Moderate | CCC | M | 55 | 0.67 |
| IC215EC | CCC | Moderate | CCC | M | 58 | 0.45 |

|         |     |          |     |   |    |      |
|---------|-----|----------|-----|---|----|------|
| IC218EC | CCC | Moderate | CCC | F | 60 | 0.63 |
| IC21MM  | CCC | Moderate | CCC | M | 44 | 0.52 |
| IC21MM  | CCC | Moderate | CCC | M | 44 | 0.52 |
| IC220EC | CCC | Moderate | CCC | M | 43 | 0.65 |
| IC223EC | CCC | Moderate | CCC | F | 53 | 0.71 |
| IC229E  | CCC | Moderate | CCC | F | 48 | 0.52 |
| IC233AC | CCC | Moderate | CCC | F | 55 | 0.43 |
| IC234E  | CCC | Moderate | CCC | F | 52 | 0.47 |
| IC234E  | CCC | Moderate | CCC | F | 52 | 0.47 |
| IC235E  | CCC | Moderate | CCC | M | 56 | 0.64 |
| IC235E  | CCC | Moderate | CCC | M | 56 | 0.64 |
| IC236E  | CCC | Moderate | CCC | M | 59 | 0.45 |
| IC236E  | CCC | Moderate | CCC | M | 59 | 0.45 |
| IC237E  | CCC | Moderate | CCC | M | 59 | 0.67 |
| IC237E  | CCC | Moderate | CCC | M | 59 | 0.67 |
| IC23MM  | CCC | Moderate | CCC | F | 58 | 0.62 |
| IC23MM  | CCC | Moderate | CCC | F | 58 | 0.62 |
| IC248E  | CCC | Moderate | CCC | M | 54 | 0.56 |
| IC24EC  | CCC | Moderate | CCC | M | 60 |      |
| IC256E  | CCC | Moderate | CCC | M | 55 | 0.66 |
| IC258E  | CCC | Moderate | CCC | F | 56 | 0.56 |
| IC25MM  | CCC | Moderate | CCC | F | 53 | 0.61 |
| IC260E  | CCC | Moderate | CCC | M | 40 | 0.58 |
| IC262E  | CCC | Moderate | CCC | M | 40 | 0.68 |
| IC269E  | CCC | Moderate | CCC | F | 60 | 0.64 |
| IC2AC   | CCC | Moderate | CCC | F | 41 | 0.54 |
| IC34EC  | CCC | Moderate | CCC | F | 60 | 0.73 |
| IC34MM  | CCC | Moderate | CCC | F | 60 | 0.47 |
| IC35MM  | CCC | Moderate | CCC | F | 58 | 0.61 |
| IC420EC | CCC | Moderate | CCC | F | 50 | 0.62 |
| IC421EC | CCC | Moderate | CCC | M | 47 | 0.45 |
| IC424EC | CCC | Moderate | CCC | M | 40 | 0.67 |
| IC426EC | CCC | Moderate | CCC | M | 44 | 0.65 |
| IC427EC | CCC | Moderate | CCC | F | 54 | 0.46 |

|         |     |          |     |   |    |      |
|---------|-----|----------|-----|---|----|------|
| IC433EC | CCC | Moderate | CCC | M | 51 | 0.45 |
| IC434EC | CCC | Moderate | CCC | F | 46 | 0.66 |
| IC435EC | CCC | Moderate | CCC | M | 56 | 0.67 |
| IC436EC | CCC | Moderate | CCC | F | 53 | 0.66 |
| IC439EC | CCC | Moderate | CCC | M | 43 | 0.61 |
| IC43MM  | CCC | Moderate | CCC | F | 45 | 0.66 |
| IC440EC | CCC | Moderate | CCC | M | 41 | 0.66 |
| IC441EC | CCC | Moderate | CCC | M | 51 | 0.65 |
| IC443EC | CCC | Moderate | CCC | M | 42 | 0.64 |
| IC444EC | CCC | Moderate | CCC | F | 50 | 0.55 |
| IC447EC | CCC | Moderate | CCC | M | 42 | 0.66 |
| IC449EC | CCC | Moderate | CCC | M | 42 | 0.59 |
| IC453EC | CCC | Moderate | CCC | M | 60 | 0.55 |
| IC457EC | CCC | Moderate | CCC | M | 43 | 0.46 |
| IC459EC | CCC | Moderate | CCC | M | 50 | 0.58 |
| IC45EC  | CCC | Moderate | CCC | F | 56 | 0.60 |
| IC461EC | CCC | Moderate | CCC | M | 41 | 0.50 |
| IC462EC | CCC | Moderate | CCC | F | 57 | 0.68 |
| IC463EC | CCC | Moderate | CCC | M | 46 | 0.68 |
| IC468EC | CCC | Moderate | CCC | M | 58 | 0.65 |
| IC46MM  | CCC | Moderate | CCC | F | 54 | 0.50 |
| IC482EC | CCC | Moderate | CCC | M | 55 | 0.60 |
| IC486EC | CCC | Moderate | CCC | F | 55 | 0.66 |
| IC487EC | CCC | Moderate | CCC | M | 45 | 0.63 |
| IC488EC | CCC | Moderate | CCC | M | 59 | 0.60 |
| IC490EC | CCC | Moderate | CCC | M | 45 | 0.55 |
| IC491EC | CCC | Moderate | CCC | M | 53 | 0.50 |
| IC492EC | CCC | Moderate | CCC | F | 46 | 0.67 |
| IC498EC | CCC | Moderate | CCC | F | 47 | 0.64 |
| IC4AC   | CCC | Moderate | CCC | F | 54 | 0.55 |
| IC50MM  | CCC | Moderate | CCC | F | 44 | 0.55 |
| IC510EC | CCC | Moderate | CCC | F | 42 | 0.68 |
| IC511EC | CCC | Moderate | CCC | M | 51 | 0.65 |
| IC514EC | CCC | Moderate | CCC | F | 45 | 0.51 |

|         |     |          |     |   |    |      |
|---------|-----|----------|-----|---|----|------|
| IC519EC | CCC | Moderate | CCC | M | 52 | 0.57 |
| IC51EC  | CCC | Moderate | CCC | F | 52 | 0.70 |
| IC521EC | CCC | Moderate | CCC | M | 49 | 0.62 |
| IC531EC | CCC | Moderate | CCC | M | 49 | 0.45 |
| IC542EC | CCC | Moderate | CCC | M | 40 | 0.55 |
| IC54MM  | CCC | Moderate | CCC | F | 52 | 0.52 |
| IC551EC | CCC | Moderate | CCC | M | 47 | 0.53 |
| IC55MM  | CCC | Moderate | CCC | F | 57 | 0.50 |
| IC564EC | CCC | Moderate | CCC | M | 45 | 0.45 |
| IC570EC | CCC | Moderate | CCC | M | 50 | 0.66 |
| IC573EC | CCC | Moderate | CCC | F | 41 | 0.51 |
| IC57EC  | CCC | Moderate | CCC | M | 53 |      |
| IC57MM  | CCC | Moderate | CCC | F | 58 | 0.58 |
| IC58MM  | CCC | Moderate | CCC | M | 40 | 0.58 |
| IC597EC | CCC | Moderate | CCC | F | 54 | 0.45 |
| IC59AC  | CCC | Moderate | CCC | M | 60 | 0.60 |
| IC59MM  | CCC | Moderate | CCC | F | 59 | 0.78 |
| IC600EC | CCC | Moderate | CCC |   | 59 |      |
| IC601EC | CCC | Moderate | CCC | F | 59 | 0.65 |
| IC606EC | CCC | Moderate | CCC | M | 41 | 0.46 |
| IC607EC | CCC | Moderate | CCC | M | 41 | 0.45 |
| IC609EC | CCC | Moderate | CCC | M | 51 | 0.48 |
| IC610EC | CCC | Moderate | CCC | M | 50 | 0.50 |
| IC61MM  | CCC | Moderate | CCC | M | 46 | 0.55 |
| IC68MM  | CCC | Moderate | CCC | F | 56 | 0.63 |
| IC72EC  | CCC | Moderate | CCC | M | 53 | 0.69 |
| IC74MM  | CCC | Moderate | CCC | F | 53 | 0.67 |
| IC76EC  | CCC | Moderate | CCC | F | 41 | 0.70 |
| IC77EC  | CCC | Moderate | CCC | F | 44 | 0.70 |
| IC78EC  | CCC | Moderate | CCC | F | 56 |      |
| IC82EC  | CCC | Moderate | CCC | F | 51 | 0.72 |
| IC98MM  | CCC | Moderate | CCC | F | 59 | 0.54 |
| IC9EC   | CCC | Moderate | CCC | F | 57 | 0.77 |
| PR05    | CCC | Moderate | CCC | F | 50 | 0.63 |

|       |     |          |     |   |    |      |
|-------|-----|----------|-----|---|----|------|
| PR08  | CCC | Moderate | CCC | F | 59 | 0.82 |
| PR12  | CCC | Moderate | CCC | F | 50 | 0.62 |
| PR15  | CCC | Moderate | CCC | F | 57 | 0.60 |
| PR172 | CCC | Moderate | CCC | F | 59 |      |
| PR174 | CCC | Moderate | CCC | M | 49 | 0.51 |
| PR175 | CCC | Moderate | CCC | F | 52 | 0.77 |
| PR180 | CCC | Moderate | CCC | F | 57 | 0.66 |
| PR184 | CCC | Moderate | CCC | M | 46 | 0.59 |
| PR200 | CCC | Moderate | CCC | F | 59 | 0.65 |
| PR204 | CCC | Moderate | CCC | F | 52 | 0.58 |
| PR24  | CCC | Moderate | CCC | M | 50 | 0.67 |
| PR27  | CCC | Moderate | CCC | M | 49 | 0.49 |
| PR39  | CCC | Moderate | CCC | F | 51 | 0.48 |
| PR41  | CCC | Moderate | CCC | F | 43 | 0.75 |
| PR44  | CCC | Moderate | CCC | F | 49 | 0.71 |
| PR51  | CCC | Moderate | CCC | F | 57 | 0.54 |
| PR57  | CCC | Moderate | CCC | F | 49 | 0.73 |
| RP01C | CCC | Moderate | CCC | M | 53 | 0.54 |
| RP05C | CCC | Moderate | CCC | M | 56 | 0.57 |
| RP10C | CCC | Moderate | CCC | M | 51 |      |
| RP245 | CCC | Moderate | CCC | F | 43 | 0.56 |
| RP246 | CCC | Moderate | CCC | M | 50 | 0.76 |
| RP247 | CCC | Moderate | CCC | F | 59 | 0.45 |
| RP24C | CCC | Moderate | CCC | M | 55 |      |
| RP251 | CCC | Moderate | CCC | F | 42 |      |
| RP253 | CCC | Moderate | CCC | F | 50 | 0.56 |
| RP257 | CCC | Moderate | CCC | M | 41 | 0.48 |
| RP258 | CCC | Moderate | CCC | M | 59 | 0.64 |
| RP260 | CCC | Moderate | CCC | F | 56 | 0.46 |
| RP265 | CCC | Moderate | CCC | F | 60 | 0.56 |
| RP33C | CCC | Moderate | CCC | F | 51 | 0.40 |
| UB154 | CCC | Moderate | CCC | M | 53 |      |
| UB159 | CCC | Moderate | CCC | M | 60 | 0.47 |
| UB170 | CCC | Moderate | CCC | F | 49 | 0.72 |

|         |     |              |   |    |      |
|---------|-----|--------------|---|----|------|
| UB179   | CCC | Moderate CCC | M | 44 | 0.44 |
| UB180   | CCC | Moderate CCC | F | 60 |      |
| UB187   | CCC | Moderate CCC | M | 56 | 0.53 |
| UB198   | CCC | Moderate CCC | M | 58 | 0.62 |
| UB201   | CCC | Moderate CCC | M | 41 | 0.67 |
| UB202   | CCC | Moderate CCC | F | 60 | 0.68 |
| UB204   | CCC | Moderate CCC | M | 57 | 0.67 |
| UB206   | CCC | Moderate CCC | M | 58 | 0.44 |
| UB218   | CCC | Moderate CCC | F | 57 |      |
| UB226   | CCC | Moderate CCC | F | 45 | 0.72 |
| UB231   | CCC | Moderate CCC | F | 58 |      |
| UB232   | CCC | Moderate CCC | F | 51 | 0.42 |
| UB250   | CCC | Moderate CCC | F | 59 |      |
| UB257   | CCC | Moderate CCC | M | 43 | 0.65 |
| UB283   | CCC | Moderate CCC | F | 47 | 0.80 |
| UB284   | CCC | Moderate CCC | F | 53 | 0.68 |
| UB285   | CCC | Moderate CCC | F | 58 | 0.44 |
| UB292   | CCC | Moderate CCC | F | 60 | 0.64 |
| UB293   | CCC | Moderate CCC | F | 57 | 0.75 |
| ABG     | CCC | Severe CCC   | F | 60 | 0.30 |
| DP106   | CCC | Severe CCC   | M | 52 | 0.40 |
| DP108   | CCC | Severe CCC   | M | 54 | 0.25 |
| DP109   | CCC | Severe CCC   | F | 59 | 0.20 |
| DP112   | CCC | Severe CCC   | F | 57 | 0.26 |
| DP116   | CCC | Severe CCC   | M | 49 | 0.36 |
| DP117   | CCC | Severe CCC   | F | 59 | 0.28 |
| DP218   | CCC | Severe CCC   | F | 54 | 0.20 |
| GMS     | CCC | Severe CCC   | M | 56 | 0.20 |
| HGS     | CCC | Severe CCC   | M | 58 | 0.16 |
| IC100MM | CCC | Severe CCC   | M | 49 | 0.24 |
| IC101AC | CCC | Severe CCC   | M | 45 | 0.17 |
| IC103EC | CCC | Severe CCC   | M | 52 | 0.40 |
| IC103EC | CCC | Severe CCC   | M | 52 | 0.40 |
| IC104AC | CCC | Severe CCC   | M | 57 | 0.31 |

|         |     |            |   |    |      |
|---------|-----|------------|---|----|------|
| IC106MM | CCC | Severe CCC | M | 58 | 0.20 |
| IC110AC | CCC | Severe CCC | M | 60 | 0.36 |
| IC111MM | CCC | Severe CCC | F | 49 | 0.37 |
| IC124MM | CCC | Severe CCC | F | 47 | 0.36 |
| IC125AC | CCC | Severe CCC | M | 43 | 0.21 |
| IC132AC | CCC | Severe CCC | F | 52 | 0.33 |
| IC139MM | CCC | Severe CCC | M | 60 | 0.25 |
| IC140MM | CCC | Severe CCC | F | 51 | 0.35 |
| IC143MM | CCC | Severe CCC | F | 53 | 0.35 |
| IC144MM | CCC | Severe CCC | M | 56 | 0.28 |
| IC145MM | CCC | Severe CCC | M | 59 | 0.37 |
| IC146AC | CCC | Severe CCC | M | 40 | 0.25 |
| IC146MM | CCC | Severe CCC |   | 60 |      |
| IC14EC  | CCC | Severe CCC | M | 54 | 0.39 |
| IC14EC  | CCC | Severe CCC | M | 54 | 0.39 |
| IC150EC | CCC | Severe CCC | F | 45 | 0.27 |
| IC152EC | CCC | Severe CCC | M | 50 | 0.31 |
| IC153EC | CCC | Severe CCC | M | 60 | 0.32 |
| IC159EC | CCC | Severe CCC | F | 48 | 0.39 |
| IC160EC | CCC | Severe CCC | M | 43 | 0.31 |
| IC161AC | CCC | Severe CCC | F | 56 | 0.20 |
| IC163EC | CCC | Severe CCC | F | 54 | 0.30 |
| IC164AC | CCC | Severe CCC | M | 45 | 0.39 |
| IC166AC | CCC | Severe CCC | F | 50 | 0.30 |
| IC167AC | CCC | Severe CCC | M | 60 | 0.30 |
| IC176EC | CCC | Severe CCC | F | 49 | 0.39 |
| IC180EC | CCC | Severe CCC | F | 56 | 0.25 |
| IC185EC | CCC | Severe CCC | F | 52 | 0.28 |
| IC186AC | CCC | Severe CCC | M | 47 | 0.38 |
| IC187EC | CCC | Severe CCC | M | 58 | 0.26 |
| IC188EC | CCC | Severe CCC | F | 50 | 0.32 |
| IC192AC | CCC | Severe CCC | M | 51 | 0.37 |
| IC192EC | CCC | Severe CCC | F | 60 | 0.25 |
| IC193EC | CCC | Severe CCC | F | 54 | 0.40 |

|         |     |            |   |    |      |
|---------|-----|------------|---|----|------|
| IC197EC | CCC | Severe CCC | F | 52 | 0.30 |
| IC201EC | CCC | Severe CCC | F | 40 | 0.40 |
| IC204AC | CCC | Severe CCC | M | 58 | 0.32 |
| IC206EC | CCC | Severe CCC | M | 52 | 0.19 |
| IC207AC | CCC | Severe CCC | M | 58 | 0.34 |
| IC210AC | CCC | Severe CCC | M | 46 | 0.28 |
| IC210EC | CCC | Severe CCC | M | 41 | 0.23 |
| IC219EC | CCC | Severe CCC | M | 57 | 0.27 |
| IC221EC | CCC | Severe CCC | F | 51 | 0.35 |
| IC222AC | CCC | Severe CCC | M | 50 | 0.33 |
| IC224EC | CCC | Severe CCC | F | 45 | 0.30 |
| IC228AC | CCC | Severe CCC | F | 47 | 0.37 |
| IC228EC | CCC | Severe CCC | M | 53 | 0.27 |
| IC229AC | CCC | Severe CCC | M | 49 | 0.29 |
| IC231AC | CCC | Severe CCC | M | 51 | 0.38 |
| IC257E  | CCC | Severe CCC | M | 60 | 0.33 |
| IC263E  | CCC | Severe CCC | M | 48 | 0.20 |
| IC2EC   | CCC | Severe CCC | M | 53 | 0.31 |
| IC2EC   | CCC | Severe CCC | M | 53 | 0.31 |
| IC39EC  | CCC | Severe CCC | M | 52 | 0.39 |
| IC39MM  | CCC | Severe CCC | M | 47 | 0.27 |
| IC40MM  | CCC | Severe CCC | F | 56 | 0.35 |
| IC417EC | CCC | Severe CCC | F | 42 | 0.40 |
| IC41AC  | CCC | Severe CCC | F | 41 | 0.40 |
| IC42AC  | CCC | Severe CCC | F | 57 | 0.30 |
| IC438EC | CCC | Severe CCC | M | 42 | 0.32 |
| IC445EC | CCC | Severe CCC | F | 56 | 0.30 |
| IC467EC | CCC | Severe CCC |   | 42 | 0.30 |
| IC477EC | CCC | Severe CCC | M | 55 | 0.30 |
| IC478EC | CCC | Severe CCC | M | 44 | 0.25 |
| IC479EC | CCC | Severe CCC | M | 44 | 0.30 |
| IC484EC | CCC | Severe CCC | M | 54 | 0.25 |
| IC504EC | CCC | Severe CCC | M | 42 | 0.25 |
| IC505EC | CCC | Severe CCC | F | 55 | 0.25 |



|         |     |            |   |    |      |
|---------|-----|------------|---|----|------|
| IC507EC | CCC | Severe CCC | M | 43 | 0.30 |
| IC524EC | CCC | Severe CCC | F | 43 | 0.25 |
| IC526EC | CCC | Severe CCC | M | 48 | 0.20 |
| IC527EC | CCC | Severe CCC | F | 40 | 0.40 |
| IC533EC | CCC | Severe CCC | M | 46 | 0.30 |
| IC538EC | CCC | Severe CCC | F | 40 | 0.35 |
| IC53MM  | CCC | Severe CCC | M | 55 | 0.26 |
| IC544EC | CCC | Severe CCC | F | 55 | 0.30 |
| IC546EC | CCC | Severe CCC | M | 45 | 0.20 |
| IC548EC | CCC | Severe CCC | M | 53 | 0.20 |
| IC550EC | CCC | Severe CCC | M | 46 | 0.20 |
| IC554EC | CCC | Severe CCC | F | 40 | 0.30 |
| IC559EC | CCC | Severe CCC | F | 51 | 0.30 |
| IC562EC | CCC | Severe CCC | F | 52 | 0.15 |
| IC563EC | CCC | Severe CCC | M | 57 | 0.40 |
| IC567EC | CCC | Severe CCC | M | 50 | 0.20 |
| IC569EC | CCC | Severe CCC | M | 50 | 0.15 |
| IC571EC | CCC | Severe CCC | F | 43 | 0.25 |
| IC572EC | CCC | Severe CCC | F | 52 | 0.15 |
| IC574EC | CCC | Severe CCC | M | 47 | 0.31 |
| IC578EC | CCC | Severe CCC | M | 55 | 0.25 |
| IC57AC  | CCC | Severe CCC | F | 55 | 0.40 |
| IC582EC | CCC | Severe CCC | M | 44 | 0.35 |
| IC585EC | CCC | Severe CCC | F | 49 | 0.20 |
| IC587EC | CCC | Severe CCC | F | 53 | 0.40 |
| IC588EC | CCC | Severe CCC | F | 59 | 0.30 |
| IC589EC | CCC | Severe CCC | M | 45 | 0.20 |
| IC58AC  | CCC | Severe CCC | M | 59 | 0.40 |
| IC590EC | CCC | Severe CCC | M | 58 | 0.35 |
| IC591EC | CCC | Severe CCC | M | 57 | 0.40 |
| IC594EC | CCC | Severe CCC | F | 44 | 0.30 |
| IC595EC | CCC | Severe CCC | F | 52 | 0.20 |
| IC599EC | CCC | Severe CCC | M | 57 | 0.30 |
| IC603EC | CCC | Severe CCC | F | 57 | 0.30 |

|         |     |            |   |    |      |
|---------|-----|------------|---|----|------|
| IC605EC | CCC | Severe CCC | M | 58 | 0.30 |
| IC608EC | CCC | Severe CCC | M | 58 | 0.20 |
| IC60AC  | CCC | Severe CCC | M | 50 | 0.23 |
| IC60MM  | CCC | Severe CCC | M | 51 | 0.40 |
| IC64AC  | CCC | Severe CCC | F | 58 | 0.40 |
| IC65MM  | CCC | Severe CCC | M | 57 | 0.35 |
| IC76AC  | CCC | Severe CCC | M | 59 | 0.25 |
| IC77MM  | CCC | Severe CCC | M | 44 | 0.29 |
| IC83AC  | CCC | Severe CCC | M | 42 | 0.32 |
| IC86AC  | CCC | Severe CCC | F | 60 | 0.40 |
| IC88MM  | CCC | Severe CCC | F | 53 | 0.20 |
| IC91AC  | CCC | Severe CCC | M | 52 | 0.29 |
| IC91MM  | CCC | Severe CCC | F | 53 | 0.23 |
| IC94AC  | CCC | Severe CCC | M | 41 | 0.16 |
| JMS     | CCC | Severe CCC | M | 48 | 0.25 |
| JRJ     | CCC | Severe CCC | M | 48 | 0.23 |
| MAP     | CCC | Severe CCC | F | 53 | 0.23 |
| MCRS    | CCC | Severe CCC | F | 43 | 0.20 |
| MSS     | CCC | Severe CCC | F | 42 | 0.20 |
| NSR     | CCC | Severe CCC | F | 54 | 0.15 |
| OMG     | CCC | Severe CCC | M | 47 | 0.21 |
| PR09    | CCC | Severe CCC | M | 52 | 0.24 |
| PR188   | CCC | Severe CCC | M | 60 | 0.34 |
| PR198   | CCC | Severe CCC | M | 56 | 0.33 |
| PR55    | CCC | Severe CCC | M | 57 | 0.38 |
| PR59    | CCC | Severe CCC | M | 48 | 0.35 |
| RP261   | CCC | Severe CCC | M | 59 | 0.28 |
| RP267   | CCC | Severe CCC | M | 51 | 0.18 |
| RP28C   | CCC | Severe CCC | M | 47 | 0.23 |
| RP30C   | CCC | Severe CCC | M | 59 | 0.37 |
| RP32C   | CCC | Severe CCC | M | 60 | 0.27 |
| RP50    | CCC | Severe CCC | M | 49 | 0.24 |
| RP52    | CCC | Severe CCC | M | 42 | 0.33 |
| RP53    | CCC | Severe CCC | M | 44 | 0.37 |

|       |     |              |   |    |      |
|-------|-----|--------------|---|----|------|
| UB125 | CCC | Severe CCC   | F | 54 | 0.23 |
| UB173 | CCC | Severe CCC   | M | 57 | 0.19 |
| UB181 | CCC | Severe CCC   | M | 60 | 0.34 |
| UB183 | CCC | Severe CCC   | M | 59 | 0.28 |
| UB274 | CCC | Severe CCC   | M | 55 | 0.13 |
| ZMC   | CCC | Severe CCC   | F | 59 | 0.36 |
| DP134 | CCC | Moderate CCC | F | 58 | 0.65 |
| DP145 | CCC | Moderate CCC | F | 49 | 0.60 |
| DP146 | CCC | Moderate CCC | F | 53 | 0.64 |
| DP152 | CCC | Moderate CCC | M | 40 | 0.43 |
| DP158 | CCC | Moderate CCC | F | 58 | 0.46 |
| DP169 | CCC | Moderate CCC | M | 51 | 0.46 |
| DP171 | CCC | Moderate CCC | F | 55 | 0.54 |
| DP175 | CCC | Moderate CCC | M | 46 | 0.44 |
| DP177 | CCC | Moderate CCC | F | 58 | 0.71 |
| DP187 | CCC | Moderate CCC | M | 44 | 0.64 |
| DP190 | CCC | Moderate CCC | F | 59 | 0.67 |
| DP192 | CCC | Moderate CCC | M | 49 | 0.61 |
| DP193 | CCC | Moderate CCC | F | 58 | 0.61 |
| DP199 | CCC | Moderate CCC | F | 49 | 0.66 |
| DP202 | CCC | Moderate CCC | F | 43 | 0.56 |
| DP207 | CCC | Moderate CCC | F | 55 | 0.65 |
| DP212 | CCC | Moderate CCC | F | 51 | 0.49 |
| DP216 | CCC | Moderate CCC | F | 54 | 0.71 |
| DP219 | CCC | Moderate CCC | M | 60 | 0.77 |
| DP221 | CCC | Moderate CCC | M | 46 | 0.73 |
| DP222 | CCC | Moderate CCC | F | 52 | 0.68 |
| DP223 | CCC | Moderate CCC | F | 56 | 0.63 |
| DP61  | CCC | Moderate CCC | F | 58 | 0.47 |
| DP67  | CCC | Moderate CCC | F | 58 | 0.69 |
| DP125 | CCC | Severe CCC   | F | 58 | 0.21 |
| DP133 | CCC | Severe CCC   | M | 53 | 0.29 |
| DP151 | CCC | Severe CCC   | F | 53 | 0.34 |
| DP155 | CCC | Severe CCC   | M | 54 | 0.40 |

|       |     |            |   |    |      |
|-------|-----|------------|---|----|------|
| DP156 | CCC | Severe CCC | M | 58 | 0.25 |
| DP172 | CCC | Severe CCC | F | 46 | 0.39 |
| DP180 | CCC | Severe CCC | M | 52 | 0.35 |
| DP188 | CCC | Severe CCC | M | 47 | 0.33 |
| DP197 | CCC | Severe CCC | F | 54 | 0.36 |
| DP204 | CCC | Severe CCC | M | 45 | 0.37 |
| DP62  | CCC | Severe CCC | F | 54 | 0.38 |

**EF** : Heart Ejection Fraction; **Moderate CCC**: CCC patients with  $0,40 \leq EF \leq 1$ ; **Severe CCC**: CCC patients with  $0 \leq EF < 0,40$ .

**Supplementary Table S3:** Blood samples used for haplogroup analysis.

| <b>Blood samples</b> | <b>Phenotype</b> | <b>Sub-phenotype</b> | <b>Sex</b> | <b>EF</b> | <b>Haplogroup</b>     | <b>Sub-haplogroup</b> |
|----------------------|------------------|----------------------|------------|-----------|-----------------------|-----------------------|
| DP034I               | ASY              | ASY                  | M          | 0.63      | African               | L2b1a2                |
| DP048I               | ASY              | ASY                  | F          | 0.67      | African               | L1c1b                 |
| DP123                | ASY              | ASY                  | F          | 0.57      | African               | L2a1g                 |
| DP130                | ASY              | ASY                  | F          | 0.63      | African               | L2a5                  |
| DP135                | ASY              | ASY                  | M          | 0.66      | African               | L2a1f2                |
| DP136                | ASY              | ASY                  | F          | 0.64      | Native American/Asian | C                     |
| DP141                | ASY              | ASY                  | M          | 0.73      | European              | K1a4f1                |
| DP142                | ASY              | ASY                  | F          | 0.72      | African               | L2a1a1                |
| DP164                | ASY              | ASY                  | F          | 0.60      | Native American/Asian | C                     |
| DP166                | ASY              | ASY                  | F          | 0.64      | African               | L0a2a1b               |
| DP174                | ASY              | ASY                  | M          | 0.82      | African               | L0a1b1a1              |
| DP179                | ASY              | ASY                  | M          | 0.68      | African               | L1c1a2                |
| DP184                | ASY              | ASY                  | M          | 0.73      | African               | L1c3c                 |
| IC100EI              | ASY              | ASY                  | F          | 0.69      | Native American/Asian | A2q                   |
| IC102EI              | ASY              | ASY                  | M          | 0.78      | African               | L1b1a4                |
| IC104EI              | ASY              | ASY                  | F          | 0.56      | African               | L1b1a15               |
| IC105EI              | ASY              | ASY                  | F          | 0.74      | African               | L1b1a15               |
| IC255E               | ASY              | ASY                  | F          | 0.66      | African               | L1b                   |
| IC261E               | ASY              | ASY                  | F          | 0.66      | European              | J2a2b1a               |
| IC34EI               | ASY              | ASY                  | M          | 0.68      | African               | L3e1a1a               |
| IC44EI               | ASY              | ASY                  | M          | 0.56      | African               | L2a1f                 |
| IC49EI               | ASY              | ASY                  | F          | 0.70      | Native American/Asian | C                     |
| IC53EI               | ASY              | ASY                  | M          | 0.52      | African               | L3e3b2                |
| IC55EI               | ASY              | ASY                  | F          | 0.60      | African               | L1c1c                 |
| IC57EI               | ASY              | ASY                  | F          | 0.71      | African               | L3e1a1a               |
| IC61EI               | ASY              | ASY                  | M          | 0.64      | African               | L0a2a1a               |
| IC63EI               | ASY              | ASY                  | F          | 0.56      | Native American/Asian | B2                    |
| IC66EI               | ASY              | ASY                  | M          | 0.53      | African               | L2a1e                 |
| IC68EI               | ASY              | ASY                  | F          | 0.75      | Native American/Asian | B2b3a                 |
| IC69EI               | ASY              | ASY                  | F          | 0.68      | African               | L1c2b                 |
| IC88EI               | ASY              | ASY                  | F          | 0.82      | Native American/Asian | A2q                   |

|          |     |              |   |      |                       |         |
|----------|-----|--------------|---|------|-----------------------|---------|
| IC89EI   | ASY | ASY          | F | 0.69 | African               | L3e3b1  |
| IC92EI   | ASY | ASY          | M | 0.66 | African               | L3e3b1  |
| IC93EI   | ASY | ASY          | M | 0.55 | European              | K1a4f1  |
| IC99EI   | ASY | ASY          | F | 0.62 | African               | L2a1c2a |
| UB167    | ASY | ASY          | M | 0.66 | African               | L2a1a3c |
| UB216    | ASY | ASY          | F | 0.62 | African               | L3b3    |
| UB242    | ASY | ASY          | F | 0.58 | Native American/Asian | B2      |
| DP038I   | CCC | Moderate CCC | M | 0.62 | African               | L1b     |
| DP044I   | CCC | Moderate CCC | F | 0.68 | African               | L2a     |
| DP049I   | CCC | Moderate CCC | M | 0.69 | African               | L3d     |
| DP050I   | CCC | Moderate CCC | F | 0.61 | African               | L2a     |
| DP103    | CCC | Moderate CCC | M | 0.72 | African               | L0a     |
| DP110    | CCC | Moderate CCC | F | 0.71 | Native American/Asian | A19     |
| DP119    | CCC | Moderate CCC | M | 0.67 | African               | L2b     |
| DP120    | CCC | Moderate CCC | F | 0.62 | African               | L3e     |
| DP122    | CCC | Moderate CCC | F | 0.69 | Native American/Asian | A       |
| DP134    | CCC | Moderate CCC | F | 0.65 | Native American/Asian | A5b     |
| DP145    | CCC | Moderate CCC | F | 0.60 | African               | L2a     |
| DP150    | CCC | Moderate CCC | F | 0.67 | European              | K1a     |
| DP153    | CCC | Moderate CCC | F | 0.67 | Eurasian              | N       |
| DP159    | CCC | Moderate CCC | M | 0.65 | Native American/Asian | B2b+152 |
| DP170    | CCC | Moderate CCC | F | 0.67 | Native American/Asian | C1      |
| DP173    | CCC | Moderate CCC | M | 0.60 | European              | H2a     |
| DP177    | CCC | Moderate CCC | F | 0.71 | African               | L2a     |
| DP187    | CCC | Moderate CCC | M | 0.64 | African               | L1b     |
| DP192    | CCC | Moderate CCC | M | 0.61 | Native American/Asian | A5b     |
| DP193    | CCC | Moderate CCC | F | 0.61 | European              | X2b     |
| DP195    | CCC | Moderate CCC | F | 0.70 | Native American/Asian | C1a     |
| DP199    | CCC | Moderate CCC | F | 0.66 | African               | L3f     |
| DP207    | CCC | Moderate CCC | F | 0.65 | African               | L2a     |
| DP210    | CCC | Moderate CCC | M | 0.70 | African               | L3e     |
| DP216    | CCC | Moderate CCC | F | 0.71 | Native American/Asian | G1a     |
| DP221-16 | CCC | Moderate CCC | F | 0.73 | African               | L1c     |
| DP222    | CCC | Moderate CCC | F | 0.68 | African               | L2a     |

|         |     |              |   |      |                       |         |
|---------|-----|--------------|---|------|-----------------------|---------|
| DP225   | CCC | Moderate CCC | F | 0.70 | African               | L2a     |
| DP64    | CCC | Moderate CCC | F | 0.64 | African               | L2a     |
| DP67    | CCC | Moderate CCC | F | 0.69 | Native American/Asian | C1      |
| DP68    | CCC | Moderate CCC | M | 0.66 | Native American/Asian | A       |
| DP70    | CCC | Moderate CCC | M | 0.78 | African               | L2c     |
| DP71    | CCC | Moderate CCC | F | 0.60 | European              | H1a     |
| DP72    | CCC | Moderate CCC | M | 0.61 | African               | L1c     |
| DP75    | CCC | Moderate CCC | F | 0.67 | African               | L3f     |
| DP85    | CCC | Moderate CCC | F | 0.64 | Native American/Asian | B4      |
| DP89    | CCC | Moderate CCC | F | 0.62 | Native American/Asian | D4h     |
| DP92    | CCC | Moderate CCC | F | 0.61 | African               | L3e     |
| DP95    | CCC | Moderate CCC | F | 0.67 | African               | L3e     |
| DP97    | CCC | Moderate CCC | M | 0.72 | European              | H2a     |
| DP99    | CCC | Moderate CCC | M | 0.64 | Native American/Asian | E       |
| IC01MM  | CCC | Moderate CCC | M | 0.66 | European              | H2a     |
| IC03MM  | CCC | Moderate CCC | F | 0.69 | Native American/Asian | B2b     |
| IC05MM  | CCC | Moderate CCC | F | 0.70 | European              | HV2     |
| IC101MM | CCC | Moderate CCC | F | 0.67 | African               | L1c     |
| IC107MM | CCC | Moderate CCC | M | 0.45 | African               | L2a     |
| IC112AC | CCC | Moderate CCC | M | 0.61 | African               | L1b1a10 |
| IC112MM | CCC | Moderate CCC | F | 0.65 | European              | W1g     |
| IC113MM | CCC | Moderate CCC | F | 0.65 | African               | L2a     |
| IC115MM | CCC | Moderate CCC | M | 0.40 | African               | L3e1e1  |
| IC117MM | CCC | Moderate CCC | F | 0.69 | European              | J2a     |
| IC121MM | CCC | Moderate CCC | M | 0.72 | European              | HV2     |
| IC125MM | CCC | Moderate CCC | M | 0.65 | Native American/Asian | A       |
| IC126MM | CCC | Moderate CCC | M | 0.61 | European              | T2e     |
| IC128MM | CCC | Moderate CCC | F | 0.60 | African               | L3e     |
| IC130MM | CCC | Moderate CCC | M | 0.61 | African               | L2a     |
| IC132MM | CCC | Moderate CCC | M | 0.71 | African               | L2a     |
| IC13MM  | CCC | Moderate CCC | F | 0.60 | African               | L2a     |
| IC153MM | CCC | Moderate CCC | M | 0.45 | Native American/Asian | A2+(64) |
| IC156EC | CCC | Moderate CCC | F | 0.68 | Native American/Asian | C1b     |
| IC157EC | CCC | Moderate CCC | F | 0.77 | Native American/Asian | C1b     |

|         |     |              |   |      |                       |                |
|---------|-----|--------------|---|------|-----------------------|----------------|
| IC157MM | CCC | Moderate CCC | M | 0.49 | African               | L3e3b1         |
| IC158EC | CCC | Moderate CCC | F | 0.67 | African               | L1b            |
| IC158MM | CCC | Moderate CCC | M | 0.47 | African               | L3f1b1a        |
| IC159MM | CCC | Moderate CCC | M | 0.58 | African               | L1c3a1b        |
| IC161MM | CCC | Moderate CCC | F | 0.62 | African               | L3e            |
| IC162EC | CCC | Moderate CCC | F | 0.69 | African               | L3d            |
| IC162MM | CCC | Moderate CCC | F | 0.68 | African               | L1b            |
| IC164MM | CCC | Moderate CCC | M | 0.68 | European              | H2a            |
| IC168MM | CCC | Moderate CCC | F | 0.66 | European              | U4a            |
| IC169EC | CCC | Moderate CCC | F | 0.73 | African               | L1b1a10        |
| IC171MM | CCC | Moderate CCC | M | 0.62 | African               | L1c            |
| IC172MM | CCC | Moderate CCC | F | 0.64 | Native American/Asian | B4             |
| IC173EC | CCC | Moderate CCC | M | 0.69 | African               | L0a2a1b        |
| IC173MM | CCC | Moderate CCC | F | 0.65 | Native American/Asian | D1f            |
| IC174MM | CCC | Moderate CCC | M | 0.62 | Native American/Asian | A2             |
| IC175EC | CCC | Moderate CCC | F | 0.62 | African               | L3e            |
| IC177MM | CCC | Moderate CCC | F | 0.66 | African               | L3e            |
| IC181MM | CCC | Moderate CCC | F | 0.61 | Native American/Asian | C1             |
| IC182EC | CCC | Moderate CCC | F | 0.72 | Native American/Asian | C1c            |
| IC184EC | CCC | Moderate CCC | M | 0.63 | Native American/Asian | D1             |
| IC190EC | CCC | Moderate CCC | F | 0.69 | Native American/Asian | B2             |
| IC190MM | CCC | Moderate CCC | F | 0.62 | African               | L3f            |
| IC192MM | CCC | Moderate CCC | F | 0.65 | European              | J2b            |
| IC193MM | CCC | Moderate CCC | F | 0.65 | European              | HV2            |
| IC194EC | CCC | Moderate CCC | M | 0.69 | African               | L2b            |
| IC194MM | CCC | Moderate CCC | M | 0.66 | Native American/Asian | C1             |
| IC196MM | CCC | Moderate CCC | F | 0.61 | African               | L2b            |
| IC197MM | CCC | Moderate CCC | F | 0.66 | Native American/Asian | C1             |
| IC199EC | CCC | Moderate CCC | F | 0.66 | Native American/Asian | A              |
| IC200EC | CCC | Moderate CCC | M | 0.67 | Native American/Asian | A2+(64)+@16111 |
| IC202EC | CCC | Moderate CCC | F | 0.67 | European              | H              |
| IC203EC | CCC | Moderate CCC | M | 0.67 | Native American/Asian | A              |
| IC208EC | CCC | Moderate CCC | M | 0.68 | Native American/Asian | A2             |
| IC211EC | CCC | Moderate CCC | M | 0.63 | Native American/Asian | B2             |



|         |     |              |   |      |                       |         |
|---------|-----|--------------|---|------|-----------------------|---------|
| IC212EC | CCC | Moderate CCC | M | 0.61 | European              | U3b1    |
| IC214EC | CCC | Moderate CCC | M | 0.67 | African               | L3f1b1a |
| IC215MM | CCC | Moderate CCC | F | 0.69 | European              | J2a     |
| IC216EC | CCC | Moderate CCC | F | 0.64 | European              | I1      |
| IC218EC | CCC | Moderate CCC | F | 0.63 | Native American/Asian | B4j     |
| IC220EC | CCC | Moderate CCC | M | 0.65 | African               | L1c     |
| IC220MM | CCC | Moderate CCC | M | 0.68 | African               | L2a     |
| IC221MM | CCC | Moderate CCC | M | 0.61 | Native American/Asian | A2      |
| IC223MM | CCC | Moderate CCC | F | 0.60 | African               | L2a     |
| IC225MM | CCC | Moderate CCC | F | 0.64 | African               | L3b     |
| IC230E  | CCC | Moderate CCC | M | 0.70 | Native American/Asian | B4      |
| IC234MM | CCC | Moderate CCC | F | 0.64 | African               | L2a     |
| IC235E  | CCC | Moderate CCC | M | 0.64 | African               | L1c     |
| IC237E  | CCC | Moderate CCC | M | 0.67 | African               | L2a     |
| IC23MM  | CCC | Moderate CCC | F | 0.62 | African               | L2      |
| IC242MM | CCC | Moderate CCC | F | 0.61 | African               | L2b     |
| IC245MM | CCC | Moderate CCC | F | 0.61 | Native American/Asian | C1      |
| IC247E  | CCC | Moderate CCC | F | 0.67 | Native American/Asian | B4      |
| IC24MM  | CCC | Moderate CCC | F | 0.67 | Native American/Asian | C1a     |
| IC256E  | CCC | Moderate CCC | M | 0.66 | African               | L2a1m   |
| IC262E  | CCC | Moderate CCC | M | 0.68 | Native American/Asian | A2q     |
| IC264MM | CCC | Moderate CCC | M | 0.60 | African               | L0d     |
| IC269E  | CCC | Moderate CCC | F | 0.64 | Native American/Asian | A8      |
| IC272E  | CCC | Moderate CCC | F | 0.65 | African               | L3f     |
| IC27MM  | CCC | Moderate CCC | F | 0.71 | African               | L3f     |
| IC283MM | CCC | Moderate CCC | M | 0.60 | African               | L3e     |
| IC294MM | CCC | Moderate CCC | F | 0.63 | Native American/Asian | A2      |
| IC295MM | CCC | Moderate CCC | F | 0.65 | African               | L1c     |
| IC317MM | CCC | Moderate CCC | F | 0.61 | African               | L3f     |
| IC318MM | CCC | Moderate CCC | F | 0.61 | African               | L3e     |
| IC327MM | CCC | Moderate CCC | F | 0.62 | African               | L2a     |
| IC336MM | CCC | Moderate CCC | M | 0.66 | European              | H2a     |
| IC33MM  | CCC | Moderate CCC | F | 0.68 | European              | H2a     |
| IC340MM | CCC | Moderate CCC | F | 0.61 | African               | L2a     |

|         |     |              |   |      |                       |        |
|---------|-----|--------------|---|------|-----------------------|--------|
| IC342MM | CCC | Moderate CCC | F | 0.60 | European              | H5     |
| IC35MM  | CCC | Moderate CCC | F | 0.61 | African               | L2b    |
| IC36MM  | CCC | Moderate CCC | F | 0.70 | European              | H2a    |
| IC38MM  | CCC | Moderate CCC | F | 0.60 | Native American/Asian | A2     |
| IC426MM | CCC | Moderate CCC | F | 0.66 | Eurasian              | N      |
| IC429MM | CCC | Moderate CCC | F | 0.61 | Native American/Asian | C1     |
| IC444MM | CCC | Moderate CCC | M | 0.60 | African               | L0a    |
| IC445MM | CCC | Moderate CCC | F | 0.70 | European              | H1a    |
| IC44AC  | CCC | Moderate CCC | F | 0.74 | European              | H1     |
| IC458MM | CCC | Moderate CCC | F | 0.61 | African               | L3e    |
| IC464MM | CCC | Moderate CCC | F | 0.67 | Native American/Asian | C1a    |
| IC500MM | CCC | Moderate CCC | M | 0.60 | European              | H2a    |
| IC504MM | CCC | Moderate CCC | M | 0.67 | African               | L2a    |
| IC509MM | CCC | Moderate CCC | F | 0.61 | Native American/Asian | A2     |
| IC510MM | CCC | Moderate CCC | F | 0.61 | European              | H2a    |
| IC517MM | CCC | Moderate CCC | M | 0.60 | African               | L2a    |
| IC518MM | CCC | Moderate CCC | F | 0.70 | African               | L1c    |
| IC51EC  | CCC | Moderate CCC | F | 0.70 | European              | H28    |
| IC523MM | CCC | Moderate CCC | F | 0.60 | African               | L2a    |
| IC538MM | CCC | Moderate CCC | F | 0.60 | European              | H2a    |
| IC539MM | CCC | Moderate CCC | F | 0.66 | African               | L2a    |
| IC542MM | CCC | Moderate CCC | F | 0.63 | African               | L3e    |
| IC68MM  | CCC | Moderate CCC | F | 0.63 | African               | L2a    |
| IC76EC  | CCC | Moderate CCC | F | 0.70 | African               | L2a1e  |
| IC77EC  | CCC | Moderate CCC | M | 0.70 | Native American/Asian | A2     |
| IC79EC  | CCC | Moderate CCC | F | 0.66 | African               | L2a1a3 |
| IC79MM  | CCC | Moderate CCC | F | 0.73 | European              | HV2    |
| IC82EC  | CCC | Moderate CCC | F | 0.72 | African               | L2a1a1 |
| IC84EC  | CCC | Moderate CCC | F | 0.62 | Native American/Asian | B2     |
| IC84MM  | CCC | Moderate CCC | M | 0.61 | African               | L0a    |
| IC85EC  | CCC | Moderate CCC | F | 0.78 | African               | L1b1a3 |
| IC85MM  | CCC | Moderate CCC | F | 0.63 | African               | L3x    |
| IC86EC  | CCC | Moderate CCC | M | 0.72 | Native American/Asian | A2     |
| IC87EC  | CCC | Moderate CCC | M | 0.62 | European              | H1     |

|         |     |              |   |      |                       |         |
|---------|-----|--------------|---|------|-----------------------|---------|
| IC89EC  | CCC | Moderate CCC | F | 0.70 | Native American/Asian | B2      |
| IC89MM  | CCC | Moderate CCC | M | 0.40 | African               | L1c5    |
| IC90EC  | CCC | Moderate CCC | M | 0.63 | European              | T2b5    |
| IC92EC  | CCC | Moderate CCC | F | 0.72 | African               | L2a1c1  |
| IC92MM  | CCC | Moderate CCC | M | 0.69 | European              | HV2     |
| IC95EC  | CCC | Moderate CCC | F | 0.68 | African               | L1b1a10 |
| IC96MM  | CCC | Moderate CCC | F | 0.70 | African               | L1c     |
| ICB08   | CCC | Moderate CCC | F | 0.65 | African               | L1b     |
| RP46    | CCC | Moderate CCC | M | 0.67 | Native American/Asian | A       |
| RP54    | CCC | Moderate CCC | F | 0.74 | European              | T1a     |
| UB101   | CCC | Moderate CCC | F | 0.67 | African               | L2a     |
| UB86    | CCC | Moderate CCC | F | 0.68 | African               | L2b     |
| DP037I  | CCC | Severe CCC   | M | 0.29 | Native American/Asian | C1      |
| DP046I  | CCC | Severe CCC   | F | 0.22 | African               | L3e     |
| DP053I  | CCC | Severe CCC   | F | 0.29 | Native American/Asian | B4      |
| DP108   | CCC | Severe CCC   | M | 0.25 | African               | L3e     |
| DP109   | CCC | Severe CCC   | F | 0.20 | African               | L1b     |
| DP112   | CCC | Severe CCC   | F | 0.26 | European              | H2a     |
| DP117   | CCC | Severe CCC   | F | 0.28 | Native American/Asian | D5a     |
| DP125   | CCC | Severe CCC   | F | 0.21 | Native American/Asian | A       |
| DP133   | CCC | Severe CCC   | M | 0.29 | African               | L2a     |
| DP148   | CCC | Severe CCC   | F | 0.30 | Eurasian              | N       |
| DP149   | CCC | Severe CCC   | M | 0.25 | African               | L1c     |
| DP156   | CCC | Severe CCC   | M | 0.25 | European              | HV2     |
| DP168   | CCC | Severe CCC   | F | 0.26 | European              | U8b     |
| DP178   | CCC | Severe CCC   | M | 0.30 | African               | L3b     |
| DP205   | CCC | Severe CCC   | F | 0.24 | Native American/Asian | C1      |
| DP218   | CCC | Severe CCC   | F | 0.20 | African               | L3e     |
| DP73    | CCC | Severe CCC   | F | 0.25 | African               | L3b     |
| DP76    | CCC | Severe CCC   | F | 0.21 | Eurasian              | M5a     |
| DP90    | CCC | Severe CCC   | M | 0.29 | African               | L3e     |
| IC09ET  | CCC | Severe CCC   | F | 0.27 | Native American/Asian | B2h     |
| IC100MM | CCC | Severe CCC   | M | 0.24 | African               | L1c     |
| IC103MM | CCC | Severe CCC   | M | 0.25 | African               | L3e     |

|         |     |            |   |      |                       |                    |
|---------|-----|------------|---|------|-----------------------|--------------------|
| IC106MM | CCC | Severe CCC | M | 0.20 | African               | L1c                |
| IC116MM | CCC | Severe CCC | F | 0.26 | Native American/Asian | A                  |
| IC119MM | CCC | Severe CCC | F | 0.30 | European              | H2a                |
| IC127EC | CCC | Severe CCC | M | 0.30 | Native American/Asian | D5a                |
| IC127MM | CCC | Severe CCC | M | 0.25 | African               | L3e2a1a            |
| IC137MM | CCC | Severe CCC | M | 0.20 | African               | L0a                |
| IC139MM | CCC | Severe CCC | M | 0.25 | European              | H3p                |
| IC147MM | CCC | Severe CCC | M | 0.30 | Eurasian              | R0a                |
| IC148MM | CCC | Severe CCC | F | 0.25 | African               | L2a                |
| IC150EC | CCC | Severe CCC | F | 0.27 | African               | L2a1+16189 (16192) |
| IC150MM | CCC | Severe CCC | F | 0.30 | African               | L3e1               |
| IC151MM | CCC | Severe CCC | M | 0.30 | European              | H2a2a              |
| IC151MM | CCC | Severe CCC | M | 0.30 | Native American/Asian | D1f                |
| IC154EC | CCC | Severe CCC | M | 0.30 | Native American/Asian | A2                 |
| IC155EC | CCC | Severe CCC | F | 0.26 | African               | L3e                |
| IC155MM | CCC | Severe CCC | M | 0.30 | European              | H2a2a1             |
| IC156MM | CCC | Severe CCC | F | 0.25 | African               | L2a1a              |
| IC160MM | CCC | Severe CCC | M | 0.30 | Native American/Asian | C1d1               |
| IC163EC | CCC | Severe CCC | F | 0.30 | African               | L1c                |
| IC165EC | CCC | Severe CCC | M | 0.25 | Native American/Asian | C1                 |
| IC166EC | CCC | Severe CCC | M | 0.25 | European              | J2a                |
| IC175MM | CCC | Severe CCC | M | 0.18 | African               | L1b                |
| IC178EC | CCC | Severe CCC | M | 0.26 | European              | H2a                |
| IC180EC | CCC | Severe CCC | F | 0.25 | African               | L1c                |
| IC181EC | CCC | Severe CCC | M | 0.28 | Native American/Asian | D1g                |
| IC184MM | CCC | Severe CCC | M | 0.25 | European              | H6                 |
| IC185EC | CCC | Severe CCC | F | 0.28 | Native American/Asian | A12a               |
| IC186MM | CCC | Severe CCC | M | 0.25 | European              | H2a                |
| IC187EC | CCC | Severe CCC | M | 0.26 | African               | L3b                |
| IC188MM | CCC | Severe CCC | M | 0.22 | African               | L0a                |
| IC192EC | CCC | Severe CCC | F | 0.25 | African               | L2a                |
| IC195EC | CCC | Severe CCC | M | 0.27 | African               | L3b                |
| IC195MM | CCC | Severe CCC | M | 0.25 | African               | L2d                |
| IC197EC | CCC | Severe CCC | F | 0.30 | Native American/Asian | D4j                |

|         |     |            |   |      |                       |      |
|---------|-----|------------|---|------|-----------------------|------|
| IC200MM | CCC | Severe CCC | M | 0.22 | African               | L3e  |
| IC206EC | CCC | Severe CCC | M | 0.19 | African               | L1c  |
| IC206MM | CCC | Severe CCC | M | 0.25 | African               | L2a  |
| IC207EC | CCC | Severe CCC | F | 0.30 | African               | L3e  |
| IC214MM | CCC | Severe CCC | F | 0.25 | Native American/Asian | A    |
| IC219EC | CCC | Severe CCC | M | 0.27 | African               | L2a  |
| IC2249E | CCC | Severe CCC | F | 0.22 | African               | L2a  |
| IC224EC | CCC | Severe CCC | F | 0.30 | African               | L2a  |
| IC227MM | CCC | Severe CCC | M | 0.20 | African               | L2a  |
| IC228EC | CCC | Severe CCC | M | 0.27 | African               | L3f  |
| IC229MM | CCC | Severe CCC | M | 0.30 | European              | HV2  |
| IC22MM  | CCC | Severe CCC | M | 0.22 | African               | L1c  |
| IC232MM | CCC | Severe CCC | M | 0.25 | African               | L2a  |
| IC236MM | CCC | Severe CCC | M | 0.24 | European              | J2a  |
| IC241MM | CCC | Severe CCC | M | 0.21 | African               | L1b  |
| IC243E  | CCC | Severe CCC | M | 0.20 | African               | L1c  |
| IC243MM | CCC | Severe CCC | M | 0.21 | Native American/Asian | B2b  |
| IC245E  | CCC | Severe CCC | M | 0.25 | European              | H42a |
| IC250MM | CCC | Severe CCC | M | 0.26 | African               | L3b  |
| IC252MM | CCC | Severe CCC | M | 0.30 | African               | L1b  |
| IC253MM | CCC | Severe CCC | M | 0.28 | African               | L3e  |
| IC256MM | CCC | Severe CCC | M | 0.25 | Native American/Asian | A    |
| IC258MM | CCC | Severe CCC | M | 0.30 | Native American/Asian | G1a  |
| IC259MM | CCC | Severe CCC | M | 0.26 | Native American/Asian | G1a  |
| IC261MM | CCC | Severe CCC | M | 0.25 | African               | L2a  |
| IC263E  | CCC | Severe CCC | M | 0.20 | European              | H42a |
| IC265MM | CCC | Severe CCC | M | 0.20 | Native American/Asian | C1   |
| IC266E  | CCC | Severe CCC | M | 0.27 | African               | L2c  |
| IC267MM | CCC | Severe CCC | F | 0.30 | African               | L2a  |
| IC268E  | CCC | Severe CCC | M | 0.30 | African               | L2c  |
| IC270MM | CCC | Severe CCC | F | 0.30 | African               | L3e  |
| IC275MM | CCC | Severe CCC | M | 0.28 | African               | L2a  |
| IC277MM | CCC | Severe CCC | M | 0.25 | African               | L3f  |
| IC279MM | CCC | Severe CCC | F | 0.21 | African               | L3e  |

|         |     |            |   |      |                       |      |
|---------|-----|------------|---|------|-----------------------|------|
| IC280MM | CCC | Severe CCC | M | 0.29 | African               | L1b  |
| IC281MM | CCC | Severe CCC | M | 0.30 | Native American/Asian | A    |
| IC282MM | CCC | Severe CCC | M | 0.20 | African               | L2a  |
| IC284MM | CCC | Severe CCC | F | 0.23 | African               | L1c  |
| IC286MM | CCC | Severe CCC | F | 0.30 | African               | L2a  |
| IC293MM | CCC | Severe CCC | M | 0.27 | European              | J2b  |
| IC297MM | CCC | Severe CCC | F | 0.30 | African               | L3f  |
| IC298MM | CCC | Severe CCC | M | 0.25 | African               | L1c  |
| IC299MM | CCC | Severe CCC | F | 0.28 | European              | H2a  |
| IC305MM | CCC | Severe CCC | M | 0.30 | Native American/Asian | C1a  |
| IC311MM | CCC | Severe CCC | F | 0.20 | African               | L2a  |
| IC313MM | CCC | Severe CCC | M | 0.25 | European              | H2a  |
| IC314MM | CCC | Severe CCC | M | 0.30 | Native American/Asian | C1   |
| IC320MM | CCC | Severe CCC | M | 0.20 | European              | H2a  |
| IC324MM | CCC | Severe CCC | F | 0.25 | African               | L2a  |
| IC335MM | CCC | Severe CCC | F | 0.20 | African               | L2a  |
| IC346MM | CCC | Severe CCC | F | 0.20 | African               | L1c  |
| IC351MM | CCC | Severe CCC | M | 0.30 | African               | L3f  |
| IC39MM  | CCC | Severe CCC | M | 0.27 | European              | T1   |
| IC39MM  | CCC | Severe CCC | M | 0.27 | European              | H42a |
| IC448MM | CCC | Severe CCC | M | 0.16 | Native American/Asian | C1   |
| IC44MM  | CCC | Severe CCC | M | 0.25 | Native American/Asian | C    |
| IC44MM  | CCC | Severe CCC | M | 0.25 | Native American/Asian | C1   |
| IC452MM | CCC | Severe CCC | F | 0.08 | Native American/Asian | C1   |
| IC454MM | CCC | Severe CCC | M | 0.30 | Eurasian              | R2c  |
| IC456MM | CCC | Severe CCC | F | 0.21 | African               | L1c  |
| IC45MM  | CCC | Severe CCC | M | 0.19 | African               | L2a  |
| IC466MM | CCC | Severe CCC | F | 0.26 | Native American/Asian | A2a  |
| IC467MM | CCC | Severe CCC | M | 0.27 | African               | L1c  |
| IC468MM | CCC | Severe CCC | M | 0.26 | African               | L1c  |
| IC480MM | CCC | Severe CCC | M | 0.18 | Native American/Asian | F3a  |
| IC486MM | CCC | Severe CCC | M | 0.30 | European              | U6a  |
| IC507MM | CCC | Severe CCC | F | 0.30 | European              | U6a  |
| IC528MM | CCC | Severe CCC | M | 0.25 | African               | L1c  |

|          |         |              |   |      |                       |                    |
|----------|---------|--------------|---|------|-----------------------|--------------------|
| IC536MM  | CCC     | Severe CCC   | M | 0.30 | African               | L2b                |
| IC53MM   | CCC     | Severe CCC   | M | 0.26 | African               | L1c3a              |
| IC541MM  | CCC     | Severe CCC   | M | 0.28 | African               | L2a                |
| IC544MM  | CCC     | Severe CCC   | F | 0.28 | African               | L1c                |
| IC61EC   | CCC     | Severe CCC   | F | 0.37 | African               | L0a2a1a            |
| IC64MM   | CCC     | Severe CCC   | M | 0.28 | Native American/Asian | A2                 |
| IC65MM   | CCC     | Severe CCC   | M | 0.35 | African               | L1c2b              |
| IC66MM   | CCC     | Severe CCC   | M | 0.23 | African               | L3f                |
| IC77MM   | CCC     | Severe CCC   | M | 0.29 | African               | L3e                |
| IC79AC   | CCC     | Severe CCC   | M | 0.30 | European              | H2a                |
| IC81MM   | CCC     | Severe CCC   | F | 0.25 | Eurasian              | N                  |
| IC88MM   | CCC     | Severe CCC   | F | 0.20 | African               | L1b                |
| IC90MM   | CCC     | Severe CCC   | M | 0.17 | African               | L2a                |
| IC95MM   | CCC     | Severe CCC   | F | 0.30 | African               | L1c1d1             |
| RP28C    | CCC     | Severe CCC   | M | 0.23 | Native American/Asian | A2                 |
| RP31C    | CCC     | Severe CCC   | M | 0.27 | European              | K1a                |
| RP32C    | CCC     | Severe CCC   | M | 0.27 | European              | I1                 |
| IC152MM  | CCC     |              | M |      | African               | L3f1b4a1           |
| IC154MM  | CCC     |              | M |      | Native American/Asian | D1                 |
| DP127    | CCC     | Moderate CCC | M | 0.72 | Native American/Asian | A2                 |
| DP146    | CCC     | Moderate CCC | F | 0.64 | African               | L3e2a1b1           |
| DP220    | CCC     | Moderate CCC | M | 0.61 | Native American/Asian | D4h3a              |
| 7210032  | Control | Control      | F |      | European              | J(J)               |
| 8227031  | Control | Control      | M |      | European              | V(V+@72)           |
| 9227032  | Control | Control      | F |      | European              | HV2(HV2)           |
| 10227052 | Control | Control      | F |      | African               | L3e(L3e2b)         |
| 11808031 | Control | Control      | F |      | African               | L1c(L1c1a2)        |
| 12813033 | Control | Control      | F |      | European              | H2a(H2a1)          |
| 13813041 | Control | Control      | F |      | African               | L2a(L2a1)          |
| 14833012 | Control | Control      | F |      | African               | L3e(L3e3)          |
| 15843041 | Control | Control      | F |      | Native American/Asian | D1f(D1f1)          |
| 16907052 | Control | Control      | F |      | Native American/Asian | B2h(B2h)           |
| 17912032 | Control | Control      | F |      | European              | U5b(U5b1b1+@16192) |
| 18912051 | Control | Control      | F |      | European              | T(T)               |

|          |         |         |   |                       |                     |
|----------|---------|---------|---|-----------------------|---------------------|
| 19309051 | Control | Control | M | Native American/Asian | M9a(M9a)            |
| 21309053 | Control | Control | F | Native American/Asian | M7a(M7a1a7)         |
| 22309072 | Control | Control | F | Native American/Asian | B4(B4)              |
| 23312012 | Control | Control | F | European              | J1c(J1c15b)         |
| 24312081 | Control | Control | F | Native American/Asian | A2(A2)              |
| 25312101 | Control | Control | M | Native American/Asian | N1a(N1a3a)          |
| 26312102 | Control | Control | F | European              | H2a(H2a2a1f)        |
| 27319021 | Control | Control | M | African               | L3e(L3e1a2)         |
| 28326021 | Control | Control | F | European              | J1c(J1c3e)          |
| 31823101 | Control | Control | M | Native American/Asian | A2(A2+(64))         |
| 32833091 | Control | Control | M | African               | L3f(L3f1b)          |
| 33838042 | Control | Control | F | European              | U8b(U8b1a2a)        |
| 34930051 | Control | Control | F | African               | L2a(L2a1)           |
| 36041011 | Control | Control | M | African               | L2a(L2a1)           |
| 37041012 | Control | Control | F | Native American/Asian | A2(A2+(64))         |
| 39111041 | Control | Control | F | Native American/Asian | A2(A2+(64))+16189)  |
| 40126061 | Control | Control | M | Native American/Asian | A2(A2+(64))+@16111) |
| 41130012 | Control | Control | F | African               | L3b(L3b1a8)         |
| 42140012 | Control | Control | F | Native American/Asian | B4(B4)              |
| 43140021 | Control | Control | M | Native American/Asian | C1b(C1b8)           |
| 44140022 | Control | Control | F | European              | H2a(H2a2a1)         |
| 45513012 | Control | Control | F | European              | J1b(J1b5)           |
| 46518081 | Control | Control | M | Native American/Asian | B4a(B4a1b1)         |
| 47518082 | Control | Control | F | European              | W(W)                |
| 48130071 | Control | Control | M | European              | K(K)                |
| 49103041 | Control | Control | M | European              | T2f(T2f7a)          |
| 50103042 | Control | Control | F | European              | U5b(U5b3h)          |
| 52103052 | Control | Control | F | European              | HV0(HV0)            |
| 53409011 | Control | Control | F | European              | K(K)                |
| 54409051 | Control | Control | F | European              | J1c(J1c2e2)         |
| 55911051 | Control | Control | F | Native American/Asian | C1d(C1d1d)          |
| 56911052 | Control | Control | M | Native American/Asian | C1(C1)              |
| 57914021 | Control | Control | F | European              | J1c(J1c5c1)         |
| 58908011 | Control | Control | M | African               | L2b(L2b1a)          |



|           |         |         |   |                       |                     |
|-----------|---------|---------|---|-----------------------|---------------------|
| 59603011  | Control | Control | F | African               | L2b(L2b1a)          |
| 60933051  | Control | Control | M | Native American/Asian | B4(B4)              |
| 61929041  | Control | Control | M | European              | H2a(H2a2a1)         |
| 62929011  | Control | Control | F | European              | U5a(U5a1g2)         |
| 63929012  | Control | Control | M | European              | H1c(H1c1)           |
| 64404101  | Control | Control | F | Native American/Asian | D1f(D1f1)           |
| 65414101  | Control | Control | M | European              | U5b(U5b3)           |
| 66417082  | Control | Control | F | European              | H3h(H3h2)           |
| 67903011  | Control | Control | F | Native American/Asian | C1d(C1d1d)          |
| 68922043  | Control | Control | F | European              | H2a(H2a2a1d)        |
| 69929081  | Control | Control | M | African               | L3d(L3d1b3a)        |
| 70903071  | Control | Control | M | European              | U8b(U8b1b)          |
| 71921101  | Control | Control | F | European              | J(J)                |
| 72912072  | Control | Control | F | Native American/Asian | A2(A2+(64))+@16111) |
| 73925021  | Control | Control | F | European              | H2a(H2a2a1f)        |
| 75934012  | Control | Control | F | African               | L2c(L2c)            |
| 76718041  | Control | Control | F | European              | H2a(H2a2a1)         |
| 77720012  | Control | Control | F | Native American/Asian | A2(A2+(64))         |
| 78737011  | Control | Control | F | African               | L3h(L3h1a2b)        |
| 80418051  | Control | Control | M | European              | H2a(H2a2a1f)        |
| 81418052  | Control | Control | F | European              | H1j(H1j8)           |
| 82425021  | Control | Control | M | Native American/Asian | A2(A2+(64))+@16111) |
| 84428022  | Control | Control | F | European              | K1a(K1a9)           |
| 86428052  | Control | Control | F | European              | H1e(H1e+16129)      |
| 89220082  | Control | Control | F | European              | V3a(V3a)            |
| 90803081  | Control | Control | M | Native American/Asian | B4(B4)              |
| 91803082  | Control | Control | F | African               | L2a(L2a1)           |
| 93809091  | Control | Control | F | European              | H2a(H2a2a1)         |
| 94838091  | Control | Control | M | African               | L2a(L2a1g)          |
| 96844091  | Control | Control | M | European              | J1c(J1c1d)          |
| 97844092  | Control | Control | F | European              | X2f(X2f1)           |
| 98850071  | Control | Control | F | European              | JT(JT)              |
| 100102082 | Control | Control | F | European              | X(X)                |
| 101106071 | Control | Control | F | European              | U5b(U5b2a5)         |

|           |         |         |   |                       |                  |
|-----------|---------|---------|---|-----------------------|------------------|
| 102116021 | Control | Control | M | Native American/Asian | B2h(B2h)         |
| 103116022 | Control | Control | F | African               | L0a(L0a'g)       |
| 104116082 | Control | Control | F | European              | T1a(T1a)         |
| 105301031 | Control | Control | M | African               | L1c(L1c2)        |
| 106301032 | Control | Control | F | African               | L1c(L1c2)        |
| 107301101 | Control | Control | F | African               | L1c(L1c2)        |
| 109303083 | Control | Control | F | African               | L3e(L3e1b)       |
| 110306031 | Control | Control | F | Native American/Asian | C1b(C1b13d)      |
| 111306051 | Control | Control | F | African               | L2a(L2a1+16189)  |
| 113306062 | Control | Control | F | Native American/Asian | A2a(A2a1)        |
| 114306102 | Control | Control | F | African               | L3b(L3b)         |
| 115700198 | Control | Control | M | European              | H1b(H1b1+16362)  |
| 116724051 | Control | Control | F | African               | L1c(L1c1)        |
| 117731031 | Control | Control | M | African               | L3e(L3e2b)       |
| 118410051 | Control | Control | F | African               | L2a(L2a1c+16129) |
| 119410052 | Control | Control | M | African               | L3e(L3e2b)       |
| 120416021 | Control | Control | F | European              | K(K)             |
| 121418032 | Control | Control | F | European              | T1(T1)           |
| 122309061 | Control | Control | M | European              | HV0(HV0)         |
| 123313091 | Control | Control | F | Native American/Asian | C1a(C1a)         |
| 124313101 | Control | Control | M | Asia                  | G1a(G1a1)        |
| 125318061 | Control | Control | F | European              | U5b(U5b1e)       |
| 126322071 | Control | Control | M | Native American/Asian | B2b(B2b3a)       |
| 127923021 | Control | Control | F | African               | L2a(L2a1a3c)     |
| 128909102 | Control | Control | F | Native American/Asian | A2q(A2q)         |
| 130900253 | Control | Control | M | European              | V(V+@72)         |
| 131909101 | Control | Control | M | Native American/Asian | A2(A2)           |
| 132936052 | Control | Control | F | European              | U5(U5)           |
| 133918061 | Control | Control | F | Native American/Asian | D1f(D1f1)        |
| 134901092 | Control | Control | F | Native American/Asian | D5b(D5b1b2)      |
| 135901091 | Control | Control | M | Native American/Asian | M6(M6)           |
| 136923081 | Control | Control | M | African               | L3b(L3b2)        |
| 137701061 | Control | Control | M | European              | U5a(U5a1)        |
| 138106041 | Control | Control | F | African               | L2a(L2a1)        |

|           |         |         |   |                       |                 |
|-----------|---------|---------|---|-----------------------|-----------------|
| 139111041 | Control | Control | F | European              | U5b(U5b1+16189) |
| 140706102 | Control | Control | F | European              | U3(U3)          |
| 141707011 | Control | Control | F | African               | L3f(L3f1b)      |
| 142707081 | Control | Control | F | Native American/Asian | C1(C1)          |
| 143709042 | Control | Control | F | European              | T2(T2+16189)    |
| 145709101 | Control | Control | M | European              | H2a(H2a2a1)     |
| 146509051 | Control | Control | M | African               | L3e(L3e1a1)     |
| 147213061 | Control | Control | F | European              | H24(H24)        |
| 148213091 | Control | Control | M | European              | HV2(HV2)        |
| 149213051 | Control | Control | F | Native American/Asian | A2(A2)          |
| 150228101 | Control | Control | M | Native American/Asian | B4(B4)          |
| 151228102 | Control | Control | F | Native American/Asian | B4(B4)          |
| 152206101 | Control | Control | M | European              | HV2(HV2)        |
| 153206102 | Control | Control | F | African               | L3b(L3b1a3)     |
| 154224081 | Control | Control | M | African               | L3b(L3b1a3)     |
| 155224111 | Control | Control | M | African               | L2a(L2a1+16189) |
| 156202031 | Control | Control | F | African               | L1c(L1c1)       |
| 157610031 | Control | Control | F | African               | L1c(L1c2a1a)    |
| 158718101 | Control | Control | F | African               | L3e(L3e1a2)     |
| 159210011 | Control | Control | M | Native American/Asian | B2h(B2h)        |
| 160230011 | Control | Control | M | European              | K1a(K1a)        |
| 161230101 | Control | Control | F | African               | L1c(L1c2)       |
| 162910071 | Control | Control | F | African               | L3e(L3e2b)      |
| 163910072 | Control | Control | M | Native American/Asian | B4(B4)          |
| 164919041 | Control | Control | F | Native American/Asian | C1(C1)          |
| 165919051 | Control | Control | F | Native American/Asian | A2(A2)          |
| 166919061 | Control | Control | F | African               | L3b(L3b)        |
| 168921021 | Control | Control | M | Native American/Asian | B4(B4)          |
| 169640071 | Control | Control | F | Native American/Asian | B2h(B2h)        |
| 170918061 | Control | Control | M | European              | H5t(H5t)        |
| 172901102 | Control | Control | F | African               | L1c(L1c4)       |
| 174003031 | Control | Control | F | European              | H101(H101)      |
| 175020072 | Control | Control | F | African               | L1b(L1b)        |
| 177023091 | Control | Control | M | African               | L2a(L2a1)       |

|           |         |         |   |                       |                     |
|-----------|---------|---------|---|-----------------------|---------------------|
| 178718051 | Control | Control | F | Native American/Asian | B4(B4)              |
| 179800101 | Control | Control | M | European              | H1a(H1a1)           |
| 180806071 | Control | Control | M | European              | H5(H5+16311)        |
| 181806072 | Control | Control | F | African               | L2b(L2b)            |
| 182806101 | Control | Control | F | Native American/Asian | B4(B4)              |
| 183810061 | Control | Control | M | Native American/Asian | B2i(B2i2a1)         |
| 184817091 | Control | Control | M | European              | H2a(H2a2a1)         |
| 185706052 | Control | Control | F | Native American/Asian | B4(B4)              |
| 186905062 | Control | Control | F | Asia                  | G1a(G1a1)           |
| 187914081 | Control | Control | F | African               | L2a(L2a1+143+16189) |
| 188711071 | Control | Control | F | European              | H2a(H2a2a1)         |
| 189711051 | Control | Control | M | African               | L3d(L3d1a1'2)       |
| 190731091 | Control | Control | M | European              | H1e(H1e+16129)      |
| 191735081 | Control | Control | M | European              | H2a(H2a5a1)         |
| 192723061 | Control | Control | F | European              | U4(U4)              |
| 193200178 | Control | Control | F | European              | HV0(HV0)            |
| 194211031 | Control | Control | M | African               | L1c(L1c2)           |
| 196216032 | Control | Control | F | Native American/Asian | A2(A2+(64))         |
| 197226051 | Control | Control | F | Native American/Asian | D4h(D4h1)           |
| 198305011 | Control | Control | M | European              | H5a(H5a4a)          |
| 201320081 | Control | Control | M | Native American/Asian | A2(A2+(64))         |
| 202320082 | Control | Control | F | Native American/Asian | A2(A2)              |
| 203323011 | Control | Control | M | African               | L2a(L2a1a2)         |
| 205300083 | Control | Control | M | European              | H1b(H1bv1)          |
| 207701083 | Control | Control | F | Native American/Asian | M9a(M9a1a1c)        |
| 208320012 | Control | Control | F | Native American/Asian | C1(C1)              |
| 209320091 | Control | Control | F | European              | U2e(U2e)            |
| 210322011 | Control | Control | M | European              | H2a(H2a2a1)         |
| 211322012 | Control | Control | F | European              | T(T)                |
| 212716041 | Control | Control | F | African               | L1c(L1c2a1a)        |
| 213720091 | Control | Control | M | African               | L0a(L0a1a)          |
| 214709101 | Control | Control | F | Native American/Asian | A2(A2+(64)+16189)   |
| 215712101 | Control | Control | F | Native American/Asian | C1(C1)              |
| 216211041 | Control | Control | M | European              | K(K)                |

|           |         |         |   |                       |                      |
|-----------|---------|---------|---|-----------------------|----------------------|
| 217211042 | Control | Control | F | Native American/Asian | C1(C1)               |
| 218208091 | Control | Control | M | European              | J1c(J1c1c)           |
| 219208092 | Control | Control | F | European              | H2a(H2a2a1)          |
| 220211091 | Control | Control | M | Native American/Asian | A2(A2)               |
| 221409101 | Control | Control | M | European              | H3c(H3c2)            |
| 222409102 | Control | Control | F | European              | U5a(U5a1+@16192)     |
| 224309081 | Control | Control | F | European              | J(J)                 |
| 225204032 | Control | Control | F | African               | L0g(L0g)             |
| 226505041 | Control | Control | M | Native American/Asian | B2m(B2m)             |
| 227708102 | Control | Control | F | Native American/Asian | A2(A2)               |
| 228901052 | Control | Control | F | African               | L3b(L3b)             |
| 229727101 | Control | Control | M | Native American/Asian | A2(A2+(64))+@16111)  |
| 230727081 | Control | Control | M | African               | L2c(L2c2b1b)         |
| 231904021 | Control | Control | M | European              | H6(H6)               |
| 232503031 | Control | Control | F | European              | H2a(H2a2a1)          |
| 233435041 | Control | Control | M | African               | L2a(L2a1)            |
| 234435042 | Control | Control | F | African               | L2a(L2a1)            |
| 235414031 | Control | Control | M | European              | J1b(J1b1a1)          |
| 236414032 | Control | Control | F | European              | H2a(H2a2a1)          |
| 237218082 | Control | Control | F | Native American/Asian | A2(A2+(64))          |
| 238218081 | Control | Control | M | Native American/Asian | C1(C1)               |
| 239601011 | Control | Control | F | African               | L2b(L2b1a)           |
| 240601021 | Control | Control | F | European              | H8(H8)               |
| 241601031 | Control | Control | F | African               | L2a(L2a1+143+@16309) |
| 242605081 | Control | Control | F | European              | J2b(J2b1a)           |
| 243607091 | Control | Control | F | European              | K1b(K1b1a)           |
| 244604061 | Control | Control | F | European              | K1b(K1b1a)           |
| 245309062 | Control | Control | F | European              | I5a(I5a4)            |
| 246323051 | Control | Control | F | African               | L3d(L3d1d)           |
| 247327031 | Control | Control | M | European              | H1a(H1aj1)           |
| 248200128 | Control | Control | M | European              | H2a(H2a2a1g)         |
| 250214101 | Control | Control | M | European              | H2a(H2a2a1)          |
| 251226081 | Control | Control | F | European              | K(K)                 |
| 252900011 | Control | Control | F | European              | U5a(U5a1a1h)         |

|           |         |         |   |                       |                   |
|-----------|---------|---------|---|-----------------------|-------------------|
| 253900058 | Control | Control | F | European              | T2b(T2b)          |
| 254911101 | Control | Control | M | European              | H11a(H11a)        |
| 256801011 | Control | Control | F | European              | U5b(U5b1b1g1)     |
| 257801021 | Control | Control | F | European              | H2a(H2a2a1f)      |
| 258801022 | Control | Control | M | European              | U5a(U5a2a)        |
| 259801031 | Control | Control | M | European              | K1(K1+16362)      |
| 260803041 | Control | Control | F | Native American/Asian | C1(C1)            |
| 261805051 | Control | Control | F | Native American/Asian | A2(A2)            |
| 262805052 | Control | Control | M | Native American/Asian | B4(B4)            |
| 263805061 | Control | Control | F | European              | H3c(H3c2)         |
| 264812071 | Control | Control | M | Native American/Asian | C1(C1)            |
| 265812072 | Control | Control | F | Native American/Asian | M7c(M7c1a4a)      |
| 266102011 | Control | Control | M | African               | L3e(L3e2)         |
| 267102051 | Control | Control | M | African               | L2a(L2a1)         |
| 269102031 | Control | Control | F | Native American/Asian | C1(C1)            |
| 270103041 | Control | Control | M | African               | L0a(L0a1b)        |
| 271110101 | Control | Control | M | European              | T1a(T1a9)         |
| 272106071 | Control | Control | F | European              | J1c(J1c11)        |
| 273106111 | Control | Control | M | Native American/Asian | A5c(A5c)          |
| 274105051 | Control | Control | F | African               | L3e(L3e1)         |
| 275108081 | Control | Control | M | Native American/Asian | C1a(C1a)          |
| 276110121 | Control | Control | F | European              | T1a(T1a9)         |
| 277101021 | Control | Control | F | European              | H2a(H2a2a1f)      |
| 278900185 | Control | Control | M | African               | L2a(L2a1c2a)      |
| 279902091 | Control | Control | M | European              | T1a(T1a)          |
| 376100111 | Control | Control | M | European              | K(K)              |
| 377900041 | Control | Control | M | African               | L0a(L0a1b)        |
| 378900081 | Control | Control | F | European              | K1a(K1a6)         |
| 379007151 | Control | Control | F | European              | W1g(W1g)          |
| 380013012 | Control | Control | F | Native American/Asian | A2(A2+(64)+16189) |
| 381016011 | Control | Control | F | African               | L3d(L3d3a)        |
| 382019052 | Control | Control | F | Native American/Asian | D4h(D4h2)         |
| 386832101 | Control | Control | M | European              | H2a(H2a2a1f)      |
| 387832102 | Control | Control | F | European              | H1e(H1e4a)        |

|            |         |         |   |                       |                    |
|------------|---------|---------|---|-----------------------|--------------------|
| 390400091  | Control | Control | M | Native American/Asian | C1(C1)             |
| 391400051  | Control | Control | F | Native American/Asian | A2(A2+(64)+@16111) |
| 392400061  | Control | Control | F | African               | L0a(L0a1'4)        |
| 393400101  | Control | Control | M | African               | L3d(L3d3a)         |
| 394400011  | Control | Control | F | African               | L3e(L3e2)          |
| 395200244  | Control | Control | F | Native American/Asian | A2(A2)             |
| 396725011  | Control | Control | M | African               | L3e(L3e1a1)        |
| 397725012  | Control | Control | F | Native American/Asian | C1(C1)             |
| 398725051  | Control | Control | M | Native American/Asian | C4c(C4c1a)         |
| 399725052  | Control | Control | F | Native American/Asian | A2(A2)             |
| 401217031  | Control | Control | M | European              | H2a(H2a2a1)        |
| 402000439  | Control | Control | M | European              | H3v(H3v+16093)     |
| 403611041  | Control | Control | M | European              | X(X)               |
| 404808011  | Control | Control | M | European              | H33c(H33c)         |
| 405811051  | Control | Control | F | African               | L3b(L3b)           |
| 406000435  | Control | Control | M | European              | K1a(K1a)           |
| 407000434  | Control | Control | F | European              | H1b(H1bv1)         |
| 408000441  | Control | Control | M | European              | T1a(T1a)           |
| 409000527  | Control | Control | M | African               | L2a(L2a1a2)        |
| 410817061  | Control | Control | F | European              | K(K)               |
| 411611051  | Control | Control | F | European              | H3v(H3v+16093)     |
| 413620032  | Control | Control | F | European              | U5b(U5b2b1a)       |
| 416215041  | Control | Control | M | European              | H1b(H1b)           |
| 420213011  | Control | Control | F | European              | H5(H5)             |
| 422211031  | Control | Control | M | European              | H2a(H2a2a1)        |
| 423320091  | Control | Control | M | Native American/Asian | B4(B4)             |
| 424320092  | Control | Control | F | Native American/Asian | A2a(A2a)           |
| 425100248  | Control | Control | F | Native American/Asian | A2a(A2a)           |
| 426111081  | Control | Control | F | African               | L1b(L1b)           |
| 427046021  | Control | Control | F | European              | U2d(U2d3)          |
| 428046012  | Control | Control | F | African               | L3e(L3e2)          |
| 1338519701 | Control | Control | M | African               | L3e(L3e3)          |
| 1339531301 | Control | Control | M | Asia                  | G1a(G1a1)          |
| 1340826701 | Control | Control | M | European              | H2a(H2a2a1)        |

|            |         |         |   |                       |             |
|------------|---------|---------|---|-----------------------|-------------|
| 1341317021 | Control | Control | M | African               | L1c(L1c1a2) |
| 1342817101 | Control | Control | M | European              | T2(T2)      |
| 1343317022 | Control | Control | F | African               | L0a(L0a1b2) |
| 1344203301 | Control | Control | F | Native American/Asian | C1(C1)      |
| 3173319102 | Control | Control | M | European              | HV6a(HV6a)  |

---



**Supplementary Table S4:** Statistics on African sub-haplogroup distribution.

|                   |            |                |                   |            |                |                   |            |                |                   |            |                |
|-------------------|------------|----------------|-------------------|------------|----------------|-------------------|------------|----------------|-------------------|------------|----------------|
|                   | <b>ASY</b> | <b>CCC</b>     |                   | <b>ASY</b> | <b>MOD</b>     |                   | <b>ASY</b> | <b>SEV</b>     |                   | <b>MOD</b> | <b>SEV</b>     |
| <b>L0</b>         | 3          | 8              | <b>L0</b>         | 3          | 5              | <b>L0</b>         | 3          | 3              | <b>L0</b>         | 5          | 3              |
| <b>L1, L2, L3</b> | 24         | 183            | <b>L1, L2, L3</b> | 24         | 85             | <b>L1, L2, L3</b> | 24         | 97             | <b>L1, L2, L3</b> | 85         | 97             |
| P value           | 0.15       |                | P value           | 0.38       |                | P value           | 0.11       |                | P value           | 0.48       |                |
| Relative risk     | 2.35       |                | Relative risk     | 1.70       |                | Relative risk     | 2.52       |                | Relative risk     | 1.34       |                |
|                   | <b>ASY</b> | <b>Healthy</b> |                   | <b>CCC</b> | <b>Healthy</b> |                   | <b>MOD</b> | <b>Healthy</b> |                   | <b>SEV</b> | <b>Healthy</b> |
| <b>L0</b>         | 3          | 7              | <b>L0</b>         | 8          | 7              | <b>L0</b>         | 5          | 7              | <b>L0</b>         | 3          | 7              |
| <b>L1, L2, L3</b> | 24         | 70             | <b>L1, L2, L3</b> | 183        | 70             | <b>L1, L2, L3</b> | 85         | 70             | <b>L1, L2, L3</b> | 97         | 70             |
| P value           | 0.71       |                | P value           | 0.14       |                | P value           | 0.54       |                | P value           | 0.11       |                |
| Relative risk     | 1.18       |                | Relative risk     | 0.73       |                | Relative risk     | 0.76       |                | Relative risk     | 0.52       |                |
|                   | <b>ASY</b> | <b>CCC</b>     |                   | <b>ASY</b> | <b>MOD</b>     |                   | <b>ASY</b> | <b>SEV</b>     |                   | <b>MOD</b> | <b>SEV</b>     |
| <b>L1</b>         | 9          | 51             | <b>L1</b>         | 9          | 20             | <b>L1</b>         | 9          | 31             | <b>L1</b>         | 20         | 31             |
| <b>L0, L2, L3</b> | 18         | 140            | <b>L0, L2, L3</b> | 18         | 70             | <b>L0, L2, L3</b> | 18         | 69             | <b>L0, L2, L3</b> | 70         | 69             |
| P value           | 0.49       |                | P value           | 0.31       |                | P value           | 0.82       |                | P value           | 0.23       |                |
| Relative risk     | 1.32       |                | Relative risk     | 1.52       |                | Relative risk     | 1.09       |                | Relative risk     | 0.77       |                |
|                   | <b>ASY</b> | <b>Healthy</b> |                   | <b>CCC</b> | <b>Healthy</b> |                   | <b>MOD</b> | <b>Healthy</b> |                   | <b>SEV</b> | <b>Healthy</b> |
| <b>L1</b>         | 9          | 14             | <b>L1</b>         | 51         | 14             | <b>L1</b>         | 20         | 14             | <b>L1</b>         | 31         | 14             |
| <b>L0, L2, L3</b> | 18         | 63             | <b>L0, L2, L3</b> | 140        | 63             | <b>L0, L2, L3</b> | 70         | 63             | <b>L0, L2, L3</b> | 69         | 63             |
| P value           | 0.11       |                | P value           | 0.16       |                | P value           | 0.57       |                | P value           | 0.06       |                |
| Relative risk     | 1.76       |                | Relative risk     | 1.14       |                | Relative risk     | 1.12       |                | Relative risk     | 1.32       |                |
|                   | <b>ASY</b> | <b>CCC</b>     |                   | <b>ASY</b> | <b>MOD</b>     |                   | <b>ASY</b> | <b>SEV</b>     |                   | <b>MOD</b> | <b>SEV</b>     |
| <b>L2</b>         | 9          | 68             | <b>L2</b>         | 9          | 38             | <b>L2</b>         | 9          | 30             | <b>L2</b>         | 38         | 30             |
| <b>L0, L1, L3</b> | 18         | 123            | <b>L0, L1, L3</b> | 18         | 52             | <b>L0, L1, L3</b> | 18         | 70             | <b>L0, L1, L3</b> | 52         | 70             |
| P value           | 0.99       |                | P value           | 0.50       |                | P value           | 0.82       |                | P value           | 0.11       |                |
| Relative risk     | 0.92       |                | Relative risk     | 0.74       |                | Relative risk     | 1.13       |                | Relative risk     | 1.31       |                |
|                   | <b>ASY</b> | <b>Healthy</b> |                   | <b>CCC</b> | <b>Healthy</b> |                   | <b>MOD</b> | <b>Healthy</b> |                   | <b>SEV</b> | <b>Healthy</b> |
| <b>L2</b>         | 9          | 25             | <b>L2</b>         | 68         | 25             | <b>L2</b>         | 20         | 25             | <b>L2</b>         | 30         | 25             |
| <b>L0, L1, L3</b> | 18         | 52             | <b>L0, L1, L3</b> | 123        | 52             | <b>L0, L1, L3</b> | 70         | 52             | <b>L0, L1, L3</b> | 70         | 52             |

P value 0.99  
Relative risk 1.03

|                   | ASY  | CCC |
|-------------------|------|-----|
| <b>L3</b>         | 6    | 64  |
| <b>L0, L1, L2</b> | 21   | 127 |
| P value           | 0.28 |     |
| Relative risk     | 0.60 |     |

|                   | ASY  | Healthy |
|-------------------|------|---------|
| <b>L3</b>         | 6    | 31      |
| <b>L0, L1, L2</b> | 21   | 46      |
| P value           | 0.11 |         |
| Relative risk     | 0.52 |         |

P value 0.67  
Relative risk 1.04

|                   | ASY  | MOD |
|-------------------|------|-----|
| <b>L3</b>         | 6    | 27  |
| <b>L0, L1, L2</b> | 21   | 63  |
| P value           | 0.48 |     |
| Relative risk     | 1.38 |     |

|                   | CCC  | Healthy |
|-------------------|------|---------|
| <b>L3</b>         | 64   | 31      |
| <b>L0, L1, L2</b> | 127  | 46      |
| P value           | 0.32 |         |
| Relative risk     | 0.92 |         |

P value 0.16  
Relative risk 0.77

|                   | ASY  | SEV |
|-------------------|------|-----|
| <b>L3</b>         | 6    | 36  |
| <b>L0, L1, L2</b> | 21   | 64  |
| P value           | 0.25 |     |
| Relative risk     | 0.58 |     |

|                   | MOD  | Healthy |
|-------------------|------|---------|
| <b>L3</b>         | 20   | 31      |
| <b>L0, L1, L2</b> | 70   | 46      |
| P value           | 0.02 |         |
| Relative risk     | 0.64 |         |

P value 0.75  
Relative risk 0.95

|                   | MOD  | SEV |
|-------------------|------|-----|
| <b>L3</b>         | 27   | 36  |
| <b>L0, L1, L2</b> | 63   | 64  |
| P value           | 0.47 |     |
| Relative risk     | 0.86 |     |

|                   | SEV  | Healthy |
|-------------------|------|---------|
| <b>L3</b>         | 36   | 31      |
| <b>L0, L1, L2</b> | 64   | 46      |
| P value           | 0.64 |         |
| Relative risk     | 0.92 |         |

11

**ASY:** Asymptomatic subjects ; **CCC:** Chronic Chagas Cardiomyopathy patients ; **MOD:** Patients with moderate Chronic Chagas Cardiomyopathy ; **SEV:** Patients with severe

12

Chronic Chagas Cardiomyopathy; **Healthy:** Healthy Brazilian reference population.

13

**Supplementary Table S5:** Clinical information on patients for whom the whole mitochondria genome has been sequenced (n=112).

| <b>Samples</b> | <b>Phenotype</b> | <b>Sub-phenotype</b> | <b>Sex</b> | <b>Age</b> | <b>EF</b> |
|----------------|------------------|----------------------|------------|------------|-----------|
| <b>DP034I</b>  | ASY              | ASY                  | M          |            | 0.63      |
| <b>DP048I</b>  | ASY              | ASY                  | F          |            | 0.67      |
| <b>DP123</b>   | ASY              | ASY                  | F          | 63         | 0.57      |
| <b>DP130</b>   | ASY              | ASY                  | F          | 61         | 0.63      |
| <b>DP135</b>   | ASY              | ASY                  | M          | 50         | 0.66      |
| <b>DP136</b>   | ASY              | ASY                  | F          | 50         | 0.64      |
| <b>DP141</b>   | ASY              | ASY                  | M          | 50         | 0.73      |
| <b>DP142</b>   | ASY              | ASY                  | F          | 50         | 0.72      |
| <b>DP164</b>   | ASY              | ASY                  | F          | 59         | 0.6       |
| <b>DP166</b>   | ASY              | ASY                  | F          | 61         | 0.64      |
| <b>DP174</b>   | ASY              | ASY                  | M          | 60         | 0.82      |
| <b>DP179</b>   | ASY              | ASY                  | M          | 60         | 0.68      |
| <b>DP184</b>   | ASY              | ASY                  | M          | 62         | 0.73      |
| <b>IC100EI</b> | ASY              | ASY                  | F          | 53         | 0.69      |
| <b>IC102EI</b> | ASY              | ASY                  | M          | 61         | 0.78      |
| <b>IC104EI</b> | ASY              | ASY                  | F          | 61         | 0.56      |
| <b>IC105EI</b> | ASY              | ASY                  | F          | 56         | 0.74      |
| <b>IC255E</b>  | ASY              | ASY                  | F          | 51         | 0.66      |
| <b>IC261E</b>  | ASY              | ASY                  | F          | 45         | 0.66      |
| <b>IC34EI</b>  | ASY              | ASY                  | M          | 49         | 0.68      |
| <b>IC44EI</b>  | ASY              | ASY                  | M          | 60         | 0.56      |
| <b>IC49EI</b>  | ASY              | ASY                  | F          | 0          | 0.7       |
| <b>IC53EI</b>  | ASY              | ASY                  | M          | 0          | 0.52      |
| <b>IC55EI</b>  | ASY              | ASY                  | F          | 53         | 0.6       |
| <b>IC57EI</b>  | ASY              | ASY                  | F          | 40         | 0.71      |
| <b>IC61EI</b>  | ASY              | ASY                  | M          | 48         | 0.64      |
| <b>IC63EI</b>  | ASY              | ASY                  | F          | 56         | 0.56      |
| <b>IC66EI</b>  | ASY              | ASY                  | M          | 51         | 0.53      |
| <b>IC68EI</b>  | ASY              | ASY                  | M          | 59         | 0.71      |
| <b>IC69EI</b>  | ASY              | ASY                  | F          | 41         | 0.68      |
| <b>IC88EI</b>  | ASY              | ASY                  | F          | 46         | 0.82      |

|                |     |          |   |    |      |
|----------------|-----|----------|---|----|------|
| <b>IC89EI</b>  | ASY | ASY      | F | 50 | 0.69 |
| <b>IC92EI</b>  | ASY | ASY      | M | 62 | 0.66 |
| <b>IC93EI</b>  | ASY | ASY      | M | 31 | 0.55 |
| <b>IC99EI</b>  | ASY | ASY      | F | 43 | 0.62 |
| <b>UB167</b>   | ASY | ASY      | M | 51 | 0.66 |
| <b>UB216</b>   | ASY | ASY      | F | 63 | 0.62 |
| <b>UB242</b>   | ASY | ASY      | F | 51 | 0.58 |
| <b>DP127</b>   | CCC | Moderate | M | 69 | 0.72 |
| <b>DP146</b>   | CCC | Moderate | F | 55 | 0.64 |
| <b>DP159</b>   | CCC | Moderate | M | 69 | 0.65 |
| <b>DP220</b>   | CCC | Moderate | M | 71 | 0.61 |
| <b>IC112AC</b> | CCC | Moderate | M | 0  | 0.61 |
| <b>IC169EC</b> | CCC | Moderate | F | 52 | 0.73 |
| <b>IC173EC</b> | CCC | Moderate | M | 50 | 0.69 |
| <b>IC182EC</b> | CCC | Moderate | F | 53 | 0.72 |
| <b>IC184EC</b> | CCC | Moderate | M | 49 | 0.63 |
| <b>IC190EC</b> | CCC | Moderate | F | 50 | 0.69 |
| <b>IC200EC</b> | CCC | Moderate | M | 62 | 0.67 |
| <b>IC202EC</b> | CCC | Moderate | F | 40 | 0.67 |
| <b>IC208EC</b> | CCC | Moderate | M | 63 | 0.68 |
| <b>IC211EC</b> | CCC | Moderate | M | 44 | 0.63 |
| <b>IC212EC</b> | CCC | Moderate | M | 51 | 0.61 |
| <b>IC214EC</b> | CCC | Moderate | M | 55 | 0.67 |
| <b>IC256E</b>  | CCC | Moderate | M | 55 | 0.66 |
| <b>IC262E</b>  | CCC | Moderate | M | 40 | 0.68 |
| <b>IC44AC</b>  | CCC | Moderate | F | 0  | 0.74 |
| <b>IC51EC</b>  | CCC | Moderate | F | 52 | 0.7  |
| <b>IC76EC</b>  | CCC | Moderate | F | 41 | 0.7  |
| <b>IC77EC</b>  | CCC | Moderate | F | 44 | 0.7  |
| <b>IC79EC</b>  | CCC | Moderate | F | 55 | 0.66 |
| <b>IC82EC</b>  | CCC | Moderate | F | 51 | 0.72 |
| <b>IC84EC</b>  | CCC | Moderate | F | 46 | 0.62 |
| <b>IC85EC</b>  | CCC | Moderate | F | 47 | 0.78 |
| <b>IC86EC</b>  | CCC | Moderate | M | 49 | 0.72 |

|                |     |          |   |    |      |
|----------------|-----|----------|---|----|------|
| <b>IC87EC</b>  | CCC | Moderate | M | 58 | 0.62 |
| <b>IC89EC</b>  | CCC | Moderate | F | 47 | 0.7  |
| <b>IC90EC</b>  | CCC | Moderate | M | 55 | 0.63 |
| <b>IC92EC</b>  | CCC | Moderate | F | 43 | 0.72 |
| <b>IC95EC</b>  | CCC | Moderate | F | 53 | 0.68 |
| <b>JAB</b>     | CCC | Moderate | M | 41 | 0.55 |
| <b>MAPC</b>    | CCC | Moderate | F | 47 | 0.55 |
| <b>AAF</b>     | CCC | Severe   | F | 61 | 0.27 |
| <b>AAF2</b>    | CCC | Severe   | M | 60 | 0.35 |
| <b>ABG</b>     | CCC | Severe   | F | 64 | 0.3  |
| <b>ABS</b>     | CCC | Severe   | M | 61 | 0.21 |
| <b>APA</b>     | CCC | Severe   | F | 60 | 0.2  |
| <b>ATL</b>     | CCC | Severe   | M | 41 | 0.19 |
| <b>BHAN</b>    | CCC | Severe   | M | 15 | 0.17 |
| <b>EAS</b>     | CCC | Severe   | M | 28 | 0.29 |
| <b>EBS</b>     | CCC | Severe   | M | 32 | 0.12 |
| <b>ECA</b>     | CCC | Severe   | F | 32 | 0.19 |
| <b>EPG</b>     | CCC | Severe   | M | 41 | 0.23 |
| <b>GMS</b>     | CCC | Severe   | M | 58 | 0.2  |
| <b>HBO</b>     | CCC | Severe   | M | 36 | 0.25 |
| <b>IC150EC</b> | CCC | Severe   | F | 47 | 0.27 |
| <b>IC61EC</b>  | CCC | Severe   | F | 63 | 0.37 |
| <b>IRSC</b>    | CCC | Severe   | F | 44 | 0.25 |
| <b>ISM</b>     | CCC | Severe   | M | 39 | 0.2  |
| <b>JAC</b>     | CCC | Severe   | M | 58 | 0.25 |
| <b>JCAL</b>    | CCC | Severe   | M | 66 | 0.21 |
| <b>JMS</b>     | CCC | Severe   | M | 50 | 0.25 |
| <b>JRJ</b>     | CCC | Severe   | M | 51 | 0.23 |
| <b>LAL</b>     | CCC | Severe   | M | 58 | 0.29 |
| <b>LMS</b>     | CCC | Severe   | M | 58 | 0.28 |
| <b>LRJ</b>     | CCC | Severe   | F | 66 | 0.25 |
| <b>MCRS</b>    | CCC | Severe   | F | 45 | 0.2  |
| <b>MDSS</b>    | CCC | Severe   | F | 60 | 0.24 |
| <b>MERS</b>    | CCC | Severe   | F | 39 | 0.2  |

|             |     |        |   |    |      |
|-------------|-----|--------|---|----|------|
| <b>MGAF</b> | CCC | Severe | M | 51 | 0.35 |
| <b>MGS</b>  | CCC | Severe | F | 61 | 0.15 |
| <b>MLM</b>  | CCC | Severe | F | 47 | 0.35 |
| <b>MSS</b>  | CCC | Severe | F | 46 | 0.2  |
| <b>NDL</b>  | CCC | Severe | F | 61 | 0.27 |
| <b>NFA</b>  | CCC | Severe | F | 58 | 0.3  |
| <b>NSR</b>  | CCC | Severe | F | 49 | 0.15 |
| <b>OMG</b>  | CCC | Severe | M | 49 | 0.21 |
| <b>PAD</b>  | CCC | Severe | M | 62 | 0.21 |
| <b>PMG</b>  | CCC | Severe | M | 57 | 0.29 |
| <b>SCS</b>  | CCC | Severe | M | 59 | 0.17 |
| <b>VPS</b>  | CCC | Severe | M | 48 | 0.19 |
| <b>ZMC</b>  | CCC | Severe | F | 54 | 0.36 |

---

**Supplementary Table S6:** Carrier analysis performed on 12429 Variants.

| Pos | Ref | Alt | Gene | ASYvsCCC          | OR      | ASYvsMOD          | OR      | ASYvsSEV            | OR      | MODvsSEV          | OR      |
|-----|-----|-----|------|-------------------|---------|-------------------|---------|---------------------|---------|-------------------|---------|
|     |     |     |      |                   | ASY/CCC |                   | ASY/MOD |                     | ASY/SEV |                   | MOD/SEV |
| 106 | G   | A   | NA   | Chi2 test         | 0.45    | Fisher exact test | 0.78    | Fisher exact test   | 0.25    | Fisher exact test | 0.32    |
|     |     |     |      | adj p value=1     |         | adj p value=1     |         | adj p value=1       |         | adj p value=0.99  |         |
| 159 | T   | G   | NA   | Fisher exact test | 0.25    | Fisher exact test | 0.6     | Fisher exact test   | 0       | Fisher exact test | 0       |
|     |     |     |      | adj p value=0.74  |         | adj p value=1     |         | adj p value=0.28    |         | adj p value=0.99  |         |
| 163 | G   | A   | NA   | Fisher exact test | 0.21    | Fisher exact test | 0.51    | Fisher exact test   | 0       | Fisher exact test | 0       |
|     |     |     |      | adj p value=0.74  |         | adj p value=1     |         | adj p value=0.46    |         | adj p value=0.99  |         |
| 180 | TA  | CC  | NA   | Fisher exact test | 0.17    | Fisher exact test | 0.39    | Fisher exact test   | 0       | Fisher exact test | 0       |
|     |     |     |      | adj p value=0.74  |         | adj p value=1     |         | adj p value=0.71    |         | adj p value=0.99  |         |
| 185 | G   | A   | NA   | Fisher exact test | 0       | Fisher exact test | 0       | Fisher exact test   | 0       | Fisher exact test |         |
|     |     |     |      | adj p value=0.74  |         | adj p value=1     |         | adj p value=1       |         | adj p value=1     |         |
| 302 | A   | AC  | NA   | Chi2 test         | 2.83    | Chi2 test         | 1.29    | Fisher exact test   | 9.38    | Fisher exact test | 7.25    |
|     |     |     |      | adj p value=0.85  |         | adj p value=1     |         | adj p value=0.025   |         | adj p value=0.39  |         |
| 310 | T   | TC  | NA   | Chi2 test         | 6.59    | Chi2 test         | 3.02    | Fisher exact test   |         | Fisher exact test |         |
|     |     |     |      | adj p value=0.034 |         | adj p value=1     |         | adj p value=4.1e-05 |         | adj p value=0.21  |         |
| 310 | T   | C   | NA   | Chi2 test         | 3.22    | Chi2 test         | 1.64    | Fisher exact test   |         | Fisher exact test |         |
|     |     |     |      | adj p value=1     |         | adj p value=1     |         | adj p value=0.021   |         | adj p value=0.51  |         |

|     |       |   |      |                   |      |                   |      |                   |       |                   |       |
|-----|-------|---|------|-------------------|------|-------------------|------|-------------------|-------|-------------------|-------|
| 318 | T     | C | NA   | Chi2 test         | 4.37 | Chi2 test         | 3.33 | Chi2 test         | 6.67  | Chi2 test         | 2     |
|     |       |   |      | adj p value=0.23  |      | adj p value=1     |      | adj p value=0.058 |       | adj p value=1     |       |
| 322 | G     | T | NA   | Fisher exact test | 4.45 | Fisher exact test | 0.64 | Fisher exact test | 10.57 | Fisher exact test | 16.57 |
|     |       |   |      | adj p value=0.74  |      | adj p value=1     |      | adj p value=0.11  |       | adj p value=0.35  |       |
| 456 | C     | T | NA   | Fisher exact test |      | Fisher exact test |      | Fisher exact test |       | Fisher exact test | 0     |
|     |       |   |      | adj p value=0.74  |      | adj p value=1     |      | adj p value=1     |       | adj p value=0.99  |       |
| 493 | A     | G | NA   | Fisher exact test | 0    | Fisher exact test | 0    | Fisher exact test | 0     | Fisher exact test |       |
|     |       |   |      | adj p value=0.74  |      | adj p value=1     |      | adj p value=1     |       | adj p value=1     |       |
| 499 | G     | C | NA   | Chi2 test         | 3.05 | Chi2 test         | 1.21 | Chi2 test         | 7.67  | Chi2 test         | 6.32  |
|     |       |   |      | adj p value=0.85  |      | adj p value=1     |      | adj p value=0.03  |       | adj p value=0.36  |       |
| 564 | G     | A | NA   | Fisher exact test | 6.29 | Fisher exact test | 2.85 | Fisher exact test | 10.57 | Fisher exact test | 3.71  |
|     |       |   |      | adj p value=0.48  |      | adj p value=1     |      | adj p value=0.11  |       | adj p value=0.99  |       |
| 750 | A     | G | RNR1 | Fisher exact test |      | Fisher exact test |      | Fisher exact test |       | Fisher exact test |       |
|     |       |   |      | adj p value=0.74  |      | adj p value=1     |      | adj p value=1     |       | adj p value=1     |       |
| 756 | C     | T | RNR1 | Chi2 test         | 0.44 | Chi2 test         | 0.99 | Fisher exact test | 0.13  | Fisher exact test | 0.13  |
|     |       |   |      | adj p value=1     |      | adj p value=1     |      | adj p value=0.12  |       | adj p value=0.51  |       |
| 764 | ACG   | A | RNR1 | Fisher exact test | 0    | Fisher exact test | 0    | Fisher exact test | 0     | Fisher exact test |       |
|     |       |   |      | adj p value=0.74  |      | adj p value=1     |      | adj p value=1     |       | adj p value=1     |       |
| 766 | GCAGC | G | RNR1 | Fisher exact test | 0    | Fisher exact test | 0    | Fisher exact test | 0     | Fisher exact test |       |



|     |    |    |      |                   |      |                   |      |                   |      |                   |      |
|-----|----|----|------|-------------------|------|-------------------|------|-------------------|------|-------------------|------|
|     |    |    |      | adj p value=0.74  |      | adj p value=1     |      | adj p value=1     |      | adj p value=1     |      |
| 769 | GC | TT | RNR1 | Fisher exact test |      | Fisher exact test |      | Fisher exact test |      | Fisher exact test | 0    |
|     |    |    |      | adj p value=0.74  |      | adj p value=1     |      | adj p value=1     |      | adj p value=0.99  |      |
| 769 | GC | CA | RNR1 | Fisher exact test | 0.14 | Fisher exact test | 0.33 | Fisher exact test | 0    | Fisher exact test | 0    |
|     |    |    |      | adj p value=0.54  |      | adj p value=1     |      | adj p value=0.46  |      | adj p value=0.99  |      |
| 809 | G  | A  | RNR1 | Fisher exact test | 0    | Fisher exact test | 0    | Fisher exact test | 0    | Fisher exact test |      |
|     |    |    |      | adj p value=0.74  |      | adj p value=1     |      | adj p value=1     |      | adj p value=1     |      |
| 813 | A  | G  | RNR1 | Chi2 test         | 0.61 | Chi2 test         | 1.44 | Fisher exact test | 0.14 | Fisher exact test | 0.1  |
|     |    |    |      | adj p value=1     |      | adj p value=1     |      | adj p value=0.19  |      | adj p value=0.21  |      |
| 825 | T  | A  | RNR1 | Chi2 test         | 0.52 | Chi2 test         | 0.89 | Chi2 test         | 0.33 | Chi2 test         | 0.37 |
|     |    |    |      | adj p value=1     |      | adj p value=1     |      | adj p value=0.84  |      | adj p value=1     |      |
| 828 | C  | T  | RNR1 | Fisher exact test | 0.17 | Fisher exact test | 0.39 | Fisher exact test | 0    | Fisher exact test | 0    |
|     |    |    |      | adj p value=0.74  |      | adj p value=1     |      | adj p value=0.71  |      | adj p value=0.99  |      |
| 843 | G  | A  | RNR1 | Fisher exact test | 0    | Fisher exact test | 0    | Fisher exact test | 0    | Fisher exact test |      |
|     |    |    |      | adj p value=0.59  |      | adj p value=1     |      | adj p value=1     |      | adj p value=1     |      |
| 870 | C  | T  | RNR1 | Chi2 test         | 0.35 | Chi2 test         | 0.77 | Fisher exact test | 0.08 | Fisher exact test | 0.1  |
|     |    |    |      | adj p value=1     |      | adj p value=1     |      | adj p value=0.24  |      | adj p value=0.99  |      |
| 877 | G  | C  | RNR1 | Chi2 test         | 0.29 | Fisher exact test | 0.58 | Fisher exact test | 0.09 | Fisher exact test | 0.16 |
|     |    |    |      | adj p value=1     |      | adj p value=1     |      | adj p value=0.35  |      | adj p value=0.99  |      |

|      |    |    |      |                   |      |                   |      |                   |      |                   |      |
|------|----|----|------|-------------------|------|-------------------|------|-------------------|------|-------------------|------|
| 880  | C  | T  | RNR1 | Fisher exact test | 0    | Fisher exact test | 0    | Fisher exact test | 0    | Fisher exact test |      |
|      |    |    |      | adj p value=0.74  |      | adj p value=1     |      | adj p value=1     |      | adj p value=1     |      |
| 883  | T  | G  | RNR1 | Chi2 test         | 0.25 | Fisher exact test | 0.51 | Fisher exact test | 0.08 | Fisher exact test | 0.16 |
|      |    |    |      | adj p value=0.85  |      | adj p value=1     |      | adj p value=0.24  |      | adj p value=0.99  |      |
| 906  | C  | T  | RNR1 | Fisher exact test | 0.17 | Fisher exact test | 0.19 | Fisher exact test | 0    | Fisher exact test | 0    |
|      |    |    |      | adj p value=0.74  |      | adj p value=1     |      | adj p value=0.71  |      | adj p value=0.99  |      |
| 917  | CA | TG | RNR1 | Fisher exact test | 0    | Fisher exact test | 0    | Fisher exact test | 0    | Fisher exact test |      |
|      |    |    |      | adj p value=0.59  |      | adj p value=1     |      | adj p value=1     |      | adj p value=1     |      |
| 921  | TC | CT | RNR1 | Fisher exact test | 0.18 | Fisher exact test | 0.13 | Fisher exact test | 0.12 | Fisher exact test | 0.91 |
|      |    |    |      | adj p value=0.59  |      | adj p value=1     |      | adj p value=0.75  |      | adj p value=1     |      |
| 921  | T  | C  | RNR1 | Fisher exact test |      |
|      |    |    |      | adj p value=0.73  |      | adj p value=1     |      | adj p value=0.19  |      | adj p value=0.86  |      |
| 930  | GC | CT | RNR1 | Fisher exact test | 0    | Fisher exact test | 0    | Fisher exact test | 0    | Fisher exact test |      |
|      |    |    |      | adj p value=0.59  |      | adj p value=1     |      | adj p value=1     |      | adj p value=1     |      |
| 933  | G  | A  | RNR1 | Fisher exact test | 0    | Fisher exact test | 0    | Fisher exact test | 0    | Fisher exact test |      |
|      |    |    |      | adj p value=0.74  |      | adj p value=1     |      | adj p value=1     |      | adj p value=1     |      |
| 964  | C  | CT | RNR1 | Fisher exact test | 0    | Fisher exact test | 0    | Fisher exact test | 0    | Fisher exact test |      |
|      |    |    |      | adj p value=0.74  |      | adj p value=1     |      | adj p value=1     |      | adj p value=1     |      |
| 1009 | C  | T  | RNR1 | Chi2 test         | 0.39 | Chi2 test         | 0.83 | Fisher exact test | 0    | Fisher exact test | 0    |

|      |     |     |      |                   |      |                   |      |                   |      |                   |      |
|------|-----|-----|------|-------------------|------|-------------------|------|-------------------|------|-------------------|------|
|      |     |     |      | adj p value=1     |      | adj p value=1     |      | adj p value=0.19  |      | adj p value=0.73  |      |
| 1039 | AT  | GC  | RNR1 | Fisher exact test | 0.17 | Fisher exact test | 0.19 | Fisher exact test | 0.17 | Fisher exact test | 0.91 |
|      |     |     |      | adj p value=0.74  |      | adj p value=1     |      | adj p value=1     |      | adj p value=1     |      |
| 1104 | A   | C   | RNR1 | Fisher exact test | 0    | Fisher exact test | 0    | Fisher exact test | 0    | Fisher exact test |      |
|      |     |     |      | adj p value=0.74  |      | adj p value=1     |      | adj p value=1     |      | adj p value=1     |      |
| 1106 | CTC | TAT | RNR1 | Fisher exact test | 0    | Fisher exact test | 0    | Fisher exact test | 0    | Fisher exact test |      |
|      |     |     |      | adj p value=0.19  |      | adj p value=1     |      | adj p value=0.71  |      | adj p value=1     |      |
| 1111 | C   | T   | RNR1 | Chi2 test         | 0.39 | Chi2 test         | 0.86 | Fisher exact test | 0.06 | Fisher exact test | 0.07 |
|      |     |     |      | adj p value=1     |      | adj p value=1     |      | adj p value=0.16  |      | adj p value=0.52  |      |
| 1120 | C   | T   | RNR1 | Chi2 test         | 0.23 | Chi2 test         | 0.55 | Fisher exact test | 0.04 | Fisher exact test | 0.07 |
|      |     |     |      | adj p value=0.28  |      | adj p value=1     |      | adj p value=0.013 |      | adj p value=0.52  |      |
| 1128 | CTG | C   | RNR1 | Chi2 test         | 0.33 | Fisher exact test | 0.67 | Fisher exact test | 0    | Fisher exact test | 0    |
|      |     |     |      | adj p value=1     |      | adj p value=1     |      | adj p value=0.19  |      | adj p value=0.99  |      |
| 1128 | C   | CAA | RNR1 | Fisher exact test | 0    | Fisher exact test | 0    | Fisher exact test | 0    | Fisher exact test |      |
|      |     |     |      | adj p value=0.59  |      | adj p value=1     |      | adj p value=1     |      | adj p value=1     |      |
| 1129 | TGC | T   | RNR1 | Fisher exact test | 0    | Fisher exact test | 0    | Fisher exact test | 0    | Fisher exact test |      |
|      |     |     |      | adj p value=0.59  |      | adj p value=1     |      | adj p value=1     |      | adj p value=1     |      |
| 1131 | C   | CAT | RNR1 | Chi2 test         | 0.33 | Fisher exact test | 0.67 | Fisher exact test | 0    | Fisher exact test | 0    |
|      |     |     |      | adj p value=1     |      | adj p value=1     |      | adj p value=0.19  |      | adj p value=0.99  |      |

|      |    |    |      |                   |      |                   |      |                    |      |                   |      |
|------|----|----|------|-------------------|------|-------------------|------|--------------------|------|-------------------|------|
| 1133 | CG | TA | RNR1 | Fisher exact test | 0    | Fisher exact test | 0    | Fisher exact test  | 0    | Fisher exact test |      |
|      |    |    |      | adj p value=0.59  |      | adj p value=1     |      | adj p value=1      |      | adj p value=1     |      |
| 1141 | C  | T  | RNR1 | Fisher exact test | 0    | Fisher exact test | 0    | Fisher exact test  | 0    | Fisher exact test |      |
|      |    |    |      | adj p value=0.35  |      | adj p value=1     |      | adj p value=1      |      | adj p value=1     |      |
| 1147 | G  | A  | RNR1 | Chi2 test         | 0.25 | Chi2 test         | 0.55 | Fisher exact test  | 0.06 | Fisher exact test | 0.11 |
|      |    |    |      | adj p value=0.28  |      | adj p value=1     |      | adj p value=0.0066 |      | adj p value=0.51  |      |
| 1151 | C  | A  | RNR1 | Chi2 test         | 0.19 | Chi2 test         | 0.49 | Fisher exact test  | 0.04 | Fisher exact test | 0.07 |
|      |    |    |      | adj p value=0.076 |      | adj p value=1     |      | adj p              |      | adj p value=0.15  |      |
|      |    |    |      |                   |      |                   |      | value=0.00024      |      |                   |      |
| 1156 | C  | G  | RNR1 | Fisher exact test | 0    | Fisher exact test | 0    | Fisher exact test  | 0    | Fisher exact test |      |
|      |    |    |      | adj p value=0.59  |      | adj p value=1     |      | adj p value=1      |      | adj p value=1     |      |
| 1173 | C  | T  | RNR1 | Chi2 test         | 0.2  | Chi2 test         | 0.46 | Fisher exact test  | 0.04 | Fisher exact test | 0.1  |
|      |    |    |      | adj p value=0.11  |      | adj p value=1     |      | adj p              |      | adj p value=0.39  |      |
|      |    |    |      |                   |      |                   |      | value=0.00068      |      |                   |      |
| 1178 | G  | A  | RNR1 | Chi2 test         | 0.35 | Chi2 test         | 0.77 | Fisher exact test  | 0.08 | Fisher exact test | 0.1  |
|      |    |    |      | adj p value=1     |      | adj p value=1     |      | adj p value=0.24   |      | adj p value=0.99  |      |
| 1185 | C  | T  | RNR1 | Chi2 test         | 0.2  | Chi2 test         | 0.45 | Fisher exact test  | 0.05 | Fisher exact test | 0.11 |
|      |    |    |      | adj p value=0.14  |      | adj p value=1     |      | adj p value=0.0016 |      | adj p value=0.51  |      |
| 1197 | G  | A  | RNR1 | Chi2 test         | 0.17 | Fisher exact test | 0.29 | Fisher exact test  | 0.09 | Fisher exact test | 0.32 |

|      |    |    |      |                   |      |                   |      |                     |      |                   |      |
|------|----|----|------|-------------------|------|-------------------|------|---------------------|------|-------------------|------|
|      |    |    |      | adj p value=0.14  |      | adj p value=1     |      | adj p value=0.092   |      | adj p value=0.99  |      |
| 1211 | G  | A  | RNR1 | Chi2 test         | 0.09 | Chi2 test         | 0.2  | Fisher exact test   | 0.04 | Fisher exact test | 0.18 |
|      |    |    |      | adj p             |      | adj p value=1     |      | adj p value=9.9e-06 |      | adj p value=0.76  |      |
|      |    |    |      | value=0.00085     |      |                   |      |                     |      |                   |      |
| 1217 | G  | A  | RNR1 | Fisher exact test | 0.03 | Fisher exact test | 0    | Fisher exact test   | 0.07 | Fisher exact test |      |
|      |    |    |      | adj p value=0.017 |      | adj p value=1     |      | adj p value=0.16    |      | adj p value=1     |      |
| 1220 | A  | G  | RNR1 | Fisher exact test | 0    | Fisher exact test | 0    | Fisher exact test   | 0    | Fisher exact test |      |
|      |    |    |      | adj p value=0.062 |      | adj p value=1     |      | adj p value=0.28    |      | adj p value=1     |      |
| 1226 | C  | T  | RNR1 | Fisher exact test | 0.06 | Fisher exact test | 0.13 | Fisher exact test   | 0    | Fisher exact test | 0    |
|      |    |    |      | adj p value=0.16  |      | adj p value=1     |      | adj p value=0.28    |      | adj p value=0.99  |      |
| 1227 | G  | A  | RNR1 | Chi2 test         | 0.09 | Chi2 test         | 0.2  | Fisher exact test   | 0.03 | Fisher exact test | 0.13 |
|      |    |    |      | adj p             |      | adj p value=1     |      | adj p value=1.1e-05 |      | adj p value=0.73  |      |
|      |    |    |      | value=0.00068     |      |                   |      |                     |      |                   |      |
| 1228 | AT | A  | RNR1 | Fisher exact test | 0    | Fisher exact test | 0    | Fisher exact test   | 0    | Fisher exact test |      |
|      |    |    |      | adj p value=0.59  |      | adj p value=1     |      | adj p value=1       |      | adj p value=1     |      |
| 1230 | CA | TT | RNR1 | Chi2 test         | 0.14 | Chi2 test         | 0.3  | Fisher exact test   | 0.04 | Fisher exact test | 0.15 |
|      |    |    |      | adj p value=0.02  |      | adj p value=1     |      | adj p               |      | adj p value=0.99  |      |
|      |    |    |      |                   |      |                   |      | value=0.00068       |      |                   |      |
| 1240 | A  | G  | RNR1 | Fisher exact test | 0    | Fisher exact test | 0    | Fisher exact test   | 0    | Fisher exact test |      |

|      |     |     |      |                   |      |                   |      |                     |      |                   |      |
|------|-----|-----|------|-------------------|------|-------------------|------|---------------------|------|-------------------|------|
|      |     |     |      | adj p value=0.35  |      | adj p value=1     |      | adj p value=1       |      | adj p value=1     |      |
| 1247 | G   | GCC | RNR1 | Fisher exact test | 0.12 | Fisher exact test | 0.18 | Fisher exact test   | 0.08 | Fisher exact test | 0.44 |
|      |     |     |      | adj p value=0.15  |      | adj p value=1     |      | adj p value=0.24    |      | adj p value=1     |      |
| 1249 | T   | C   | RNR1 | Chi2 test         | 0.06 | Chi2 test         | 0.15 | Fisher exact test   | 0.02 | Fisher exact test | 0.15 |
|      |     |     |      | adj p value=1e-04 |      | adj p value=1     |      | adj p value=6.4e-07 |      | adj p value=0.71  |      |
| 1253 | C   | A   | RNR1 | Fisher exact test | 0.21 | Fisher exact test | 0.51 | Fisher exact test   | 0    | Fisher exact test | 0    |
|      |     |     |      | adj p value=0.74  |      | adj p value=1     |      | adj p value=0.46    |      | adj p value=0.99  |      |
| 1257 | T   | A   | RNR1 | Chi2 test         | 0.22 | Chi2 test         | 0.44 | Fisher exact test   | 0.09 | Fisher exact test | 0.21 |
|      |     |     |      | adj p value=0.3   |      | adj p value=1     |      | adj p value=0.092   |      | adj p value=0.99  |      |
| 1261 | CC  | GG  | RNR1 | Fisher exact test | 0.18 | Fisher exact test | 0    | Fisher exact test   | 0.38 | Fisher exact test |      |
|      |     |     |      | adj p value=0.74  |      | adj p value=1     |      | adj p value=1       |      | adj p value=1     |      |
| 1263 | G   | T   | RNR1 | Chi2 test         | 0.17 | Chi2 test         | 0.4  | Fisher exact test   | 0.04 | Fisher exact test | 0.11 |
|      |     |     |      | adj p value=0.04  |      | adj p value=1     |      | adj p               |      | adj p value=0.51  |      |
|      |     |     |      |                   |      |                   |      | value=0.00068       |      |                   |      |
| 1281 | TG  | T   | RNR1 | Chi2 test         | 0.44 | Chi2 test         | 0.61 | Fisher exact test   | 0.28 | Fisher exact test | 0.45 |
|      |     |     |      | adj p value=1     |      | adj p value=1     |      | adj p value=1       |      | adj p value=0.99  |      |
| 1282 | GAT | G   | RNR1 | Chi2 test         | 0.15 | Chi2 test         | 0.31 | Fisher exact test   | 0.04 | Fisher exact test | 0.13 |
|      |     |     |      | adj p value=0.029 |      | adj p value=1     |      | adj p               |      | adj p value=0.73  |      |
|      |     |     |      |                   |      |                   |      | value=0.00033       |      |                   |      |

|      |    |    |      |                    |      |                   |      |                     |      |                   |      |
|------|----|----|------|--------------------|------|-------------------|------|---------------------|------|-------------------|------|
| 1284 | TG | AA | RNR1 | Chi2 test          | 0.44 | Chi2 test         | 0.56 | Fisher exact test   | 0.31 | Fisher exact test | 0.55 |
|      |    |    |      | adj p value=1      |      | adj p value=1     |      | adj p value=1       |      | adj p value=1     |      |
| 1285 | G  | GA | RNR1 | Chi2 test          | 0.12 | Chi2 test         | 0.28 | Fisher exact test   | 0.04 | Fisher exact test | 0.13 |
|      |    |    |      | adj p value=0.0087 |      | adj p value=1     |      | adj p value=0.00024 |      | adj p value=0.73  |      |
| 1289 | GC | TT | RNR1 | Fisher exact test  | 0.13 | Fisher exact test | 0    | Fisher exact test   | 0.27 | Fisher exact test |      |
|      |    |    |      | adj p value=0.74   |      | adj p value=1     |      | adj p value=1       |      | adj p value=1     |      |
| 1290 | C  | T  | RNR1 | Chi2 test          | 0.31 | Chi2 test         | 0.61 | Fisher exact test   | 0.06 | Fisher exact test | 0.1  |
|      |    |    |      | adj p value=1      |      | adj p value=1     |      | adj p value=0.16    |      | adj p value=0.99  |      |
| 1291 | T  | C  | RNR1 | Chi2 test          | 0.21 | Chi2 test         | 0.45 | Fisher exact test   | 0.06 | Fisher exact test | 0.12 |
|      |    |    |      | adj p value=0.34   |      | adj p value=1     |      | adj p value=0.093   |      | adj p value=0.99  |      |
| 1291 | TA | CG | RNR1 | Chi2 test          | 0.49 | Chi2 test         | 0.96 | Fisher exact test   | 0.15 | Fisher exact test | 0.15 |
|      |    |    |      | adj p value=1      |      | adj p value=1     |      | adj p value=0.5     |      | adj p value=0.99  |      |
| 1292 | A  | G  | RNR1 | Chi2 test          | 0.37 | Chi2 test         | 0.86 | Fisher exact test   | 0.13 | Fisher exact test | 0.15 |
|      |    |    |      | adj p value=1      |      | adj p value=1     |      | adj p value=0.12    |      | adj p value=0.71  |      |
| 1293 | C  | T  | RNR1 | Chi2 test          | 0.25 | Fisher exact test | 0.39 | Fisher exact test   | 0.08 | Fisher exact test | 0.2  |
|      |    |    |      | adj p value=0.85   |      | adj p value=1     |      | adj p value=0.24    |      | adj p value=0.99  |      |
| 1295 | A  | G  | RNR1 | Chi2 test          | 0.17 | Chi2 test         | 0.38 | Fisher exact test   | 0.05 | Fisher exact test | 0.13 |
|      |    |    |      | adj p value=0.037  |      | adj p value=1     |      |                     |      | adj p value=0.51  |      |

|      |     |     |      |                    |      |                   |      |                     |      |                   |      |
|------|-----|-----|------|--------------------|------|-------------------|------|---------------------|------|-------------------|------|
|      |     |     |      |                    |      |                   |      | adj p               |      |                   |      |
|      |     |     |      |                    |      |                   |      | value=0.00036       |      |                   |      |
| 1303 | G   | A   | RNR1 | Chi2 test          | 0.16 | Chi2 test         | 0.29 | Fisher exact test   | 0.07 | Fisher exact test | 0.24 |
|      |     |     |      | adj p value=0.031  |      | adj p value=1     |      | adj p value=0.0013  |      | adj p value=0.99  |      |
| 1310 | C   | T   | RNR1 | Chi2 test          | 0.23 | Chi2 test         | 0.5  | Fisher exact test   | 0.06 | Fisher exact test | 0.11 |
|      |     |     |      | adj p value=0.22   |      | adj p value=1     |      | adj p value=0.0033  |      | adj p value=0.51  |      |
| 1311 | C   | CTA | RNR1 | Chi2 test          | 0.2  | Chi2 test         | 0.5  | Fisher exact test   | 0    | Fisher exact test | 0    |
|      |     |     |      | adj p value=0.34   |      | adj p value=1     |      | adj p value=0.021   |      | adj p value=0.73  |      |
| 1311 | C   | A   | RNR1 | Fisher exact test  | 0.21 | Fisher exact test | 0.24 | Fisher exact test   | 0.22 | Fisher exact test | 0.9  |
|      |     |     |      | adj p value=0.58   |      | adj p value=1     |      | adj p value=1       |      | adj p value=1     |      |
| 1312 | C   | T   | RNR1 | Chi2 test          | 0.31 | Chi2 test         | 0.62 | Fisher exact test   | 0.09 | Fisher exact test | 0.15 |
|      |     |     |      | adj p value=0.85   |      | adj p value=1     |      | adj p value=0.092   |      | adj p value=0.99  |      |
| 1314 | CGT | C   | RNR1 | Chi2 test          | 0.2  | Chi2 test         | 0.5  | Fisher exact test   | 0    | Fisher exact test | 0    |
|      |     |     |      | adj p value=0.34   |      | adj p value=1     |      | adj p value=0.021   |      | adj p value=0.73  |      |
| 1315 | G   | A   | RNR1 | Chi2 test          | 0.13 | Chi2 test         | 0.22 | Fisher exact test   | 0.06 | Fisher exact test | 0.28 |
|      |     |     |      | adj p value=0.0096 |      | adj p value=1     |      | adj p               |      | adj p value=0.99  |      |
|      |     |     |      |                    |      |                   |      | value=0.00053       |      |                   |      |
| 1320 | G   | A   | RNR1 | Chi2 test          | 0.1  | Chi2 test         | 0.23 | Fisher exact test   | 0.03 | Fisher exact test | 0.13 |
|      |     |     |      | adj p value=0.0023 |      | adj p value=1     |      | adj p value=6.8e-06 |      | adj p value=0.51  |      |



|      |     |      |      |                   |      |                   |      |                    |      |                   |      |
|------|-----|------|------|-------------------|------|-------------------|------|--------------------|------|-------------------|------|
| 1323 | G   | T    | RNR1 | Chi2 test         | 0.15 | Chi2 test         | 0.39 | Fisher exact test  | 0    | Fisher exact test | 0    |
|      |     |      |      | adj p value=0.076 |      | adj p value=1     |      | adj p value=0.0026 |      | adj p value=0.51  |      |
| 1362 | GC  | G    | RNR1 | Fisher exact test | 0.16 | Fisher exact test | 0.4  | Fisher exact test  | 0    | Fisher exact test | 0    |
|      |     |      |      | adj p value=0.16  |      | adj p value=1     |      | adj p value=0.021  |      | adj p value=0.99  |      |
| 1364 | T   | A    | RNR1 | Fisher exact test | 0.13 | Fisher exact test | 0.32 | Fisher exact test  | 0    | Fisher exact test | 0    |
|      |     |      |      | adj p value=0.062 |      | adj p value=1     |      | adj p value=0.0064 |      | adj p value=0.99  |      |
| 1367 | A   | G    | RNR1 | Fisher exact test | 0.11 | Fisher exact test | 0.27 | Fisher exact test  | 0    | Fisher exact test | 0    |
|      |     |      |      | adj p value=0.065 |      | adj p value=1     |      | adj p value=0.012  |      | adj p value=0.99  |      |
| 1375 | C   | CA   | RNR1 | Chi2 test         | 0.19 | Chi2 test         | 0.49 | Fisher exact test  | 0    | Fisher exact test | 0    |
|      |     |      |      | adj p value=0.23  |      | adj p value=1     |      | adj p value=0.0064 |      | adj p value=0.51  |      |
| 1376 | CC  | TT   | RNR1 | Chi2 test         | 0.28 | Chi2 test         | 0.62 | Fisher exact test  | 0.04 | Fisher exact test | 0.07 |
|      |     |      |      | adj p value=0.6   |      | adj p value=1     |      | adj p value=0.025  |      | adj p value=0.52  |      |
| 1376 | C   | T    | RNR1 | Chi2 test         | 0.33 | Chi2 test         | 0.83 | Fisher exact test  | 0    | Fisher exact test | 0    |
|      |     |      |      | adj p value=1     |      | adj p value=1     |      | adj p value=0.19   |      | adj p value=0.73  |      |
| 1384 | ACT | A    | RNR1 | Fisher exact test | 0.11 | Fisher exact test | 0.25 | Fisher exact test  | 0    | Fisher exact test | 0    |
|      |     |      |      | adj p value=0.084 |      | adj p value=1     |      | adj p value=0.042  |      | adj p value=0.99  |      |
| 1387 | A   | ATGT | RNR1 | Fisher exact test | 0.11 | Fisher exact test | 0.27 | Fisher exact test  | 0    | Fisher exact test | 0    |
|      |     | CG   |      | adj p value=0.065 |      | adj p value=1     |      | adj p value=0.012  |      | adj p value=0.99  |      |
| 1388 | C   | T    | RNR1 | Fisher exact test | 0    | Fisher exact test | 0    | Fisher exact test  | 0    | Fisher exact test |      |

|      |    |    |      |                    |      |                   |      |                     |      |                   |      |
|------|----|----|------|--------------------|------|-------------------|------|---------------------|------|-------------------|------|
|      |    |    |      | adj p value=0.59   |      | adj p value=1     |      | adj p value=1       |      | adj p value=1     |      |
| 1391 | T  | C  | RNR1 | Chi2 test          | 0.15 | Chi2 test         | 0.41 | Fisher exact test   | 0    | Fisher exact test | 0    |
|      |    |    |      | adj p value=0.037  |      | adj p value=1     |      | adj p value=0.00024 |      | adj p value=0.21  |      |
| 1393 | GC | G  | RNR1 | Fisher exact test  | 0    | Fisher exact test | 0    | Fisher exact test   | 0    | Fisher exact test |      |
|      |    |    |      | adj p value=0.59   |      | adj p value=1     |      | adj p value=1       |      | adj p value=1     |      |
| 1393 | G  | A  | RNR1 | Chi2 test          | 0.12 | Chi2 test         | 0.34 | Fisher exact test   | 0.01 | Fisher exact test | 0.03 |
|      |    |    |      | adj p value=0.0063 |      | adj p value=1     |      | adj p value=6.4e-07 |      | adj p value=0.016 |      |
| 1396 | C  | G  | RNR1 | Chi2 test          | 0.14 | Chi2 test         | 0.38 | Fisher exact test   | 0    | Fisher exact test | 0    |
|      |    |    |      | adj p value=0.037  |      | adj p value=1     |      | adj p value=0.00053 |      | adj p value=0.35  |      |
| 1398 | T  | G  | RNR1 | Chi2 test          | 0.33 | Fisher exact test | 0.67 | Fisher exact test   | 0    | Fisher exact test | 0    |
|      |    |    |      | adj p value=1      |      | adj p value=1     |      | adj p value=0.19    |      | adj p value=0.99  |      |
| 1405 | CT | TC | RNR1 | Chi2 test          | 0.66 | Chi2 test         | 0.83 | Chi2 test           | 0.62 | Chi2 test         | 0.75 |
|      |    |    |      | adj p value=1      |      | adj p value=1     |      | adj p value=1       |      | adj p value=1     |      |
| 1405 | C  | T  | RNR1 | Chi2 test          | 0.46 | Chi2 test         | 0.69 | Fisher exact test   | 0.29 | Fisher exact test | 0.42 |
|      |    |    |      | adj p value=1      |      | adj p value=1     |      | adj p value=0.81    |      | adj p value=0.99  |      |
| 1412 | G  | GC | RNR1 | Chi2 test          | 0.4  | Chi2 test         | 0.64 | Chi2 test           | 0.32 | Chi2 test         | 0.5  |
|      |    |    |      | adj p value=1      |      | adj p value=1     |      | adj p value=0.74    |      | adj p value=1     |      |

|      |     |   |      |                   |      |                   |      |                   |      |                   |      |
|------|-----|---|------|-------------------|------|-------------------|------|-------------------|------|-------------------|------|
| 1413 | TCG | T | RNR1 | Fisher exact test | 0    | Fisher exact test | 0    | Fisher exact test | 0    | Fisher exact test |      |
|      |     |   |      | adj p value=0.59  |      | adj p value=1     |      | adj p value=1     |      | adj p value=1     |      |
| 1414 | CG  | C | RNR1 | Chi2 test         | 0.53 | Chi2 test         | 0.91 | Chi2 test         | 0.4  | Chi2 test         | 0.44 |
|      |     |   |      | adj p value=1     |      |
| 1420 | T   | A | RNR1 | Chi2 test         | 0.34 | Chi2 test         | 0.57 | Chi2 test         | 0.25 | Chi2 test         | 0.44 |
|      |     |   |      | adj p value=0.83  |      | adj p value=1     |      | adj p value=0.4   |      | adj p value=1     |      |
| 1431 | G   | A | RNR1 | Chi2 test         | 0.39 | Chi2 test         | 0.57 | Chi2 test         | 0.32 | Chi2 test         | 0.56 |
|      |     |   |      | adj p value=1     |      | adj p value=1     |      | adj p value=0.86  |      | adj p value=1     |      |
| 1436 | C   | T | RNR1 | Chi2 test         | 0.39 | Chi2 test         | 0.57 | Chi2 test         | 0.32 | Chi2 test         | 0.56 |
|      |     |   |      | adj p value=1     |      | adj p value=1     |      | adj p value=0.86  |      | adj p value=1     |      |
| 1437 | T   | C | RNR1 | Chi2 test         | 0.29 | Chi2 test         | 0.72 | Fisher exact test | 0    | Fisher exact test | 0    |
|      |     |   |      | adj p value=1     |      | adj p value=1     |      | adj p value=0.12  |      | adj p value=0.73  |      |
| 1438 | A   | G | RNR1 | Fisher exact test | 1.15 | Fisher exact test | 0.49 | Fisher exact test |      | Fisher exact test |      |
|      |     |   |      | adj p value=1     |      | adj p value=1     |      | adj p value=1     |      | adj p value=0.99  |      |
| 1443 | T   | C | RNR1 | Chi2 test         | 0.32 | Chi2 test         | 0.53 | Chi2 test         | 0.22 | Chi2 test         | 0.42 |
|      |     |   |      | adj p value=0.59  |      | adj p value=1     |      | adj p value=0.3   |      | adj p value=1     |      |
| 1450 | C   | T | RNR1 | Chi2 test         | 0.48 | Chi2 test         | 0.75 | Chi2 test         | 0.35 | Chi2 test         | 0.47 |
|      |     |   |      | adj p value=1     |      |
| 1453 | A   | G | RNR1 | Fisher exact test | 0.11 | Fisher exact test | 0.27 | Fisher exact test | 0    | Fisher exact test | 0    |

|      |    |    |      |                   |      |                   |      |                   |      |                   |      |
|------|----|----|------|-------------------|------|-------------------|------|-------------------|------|-------------------|------|
|      |    |    |      | adj p value=0.065 |      | adj p value=1     |      | adj p value=0.012 |      | adj p value=0.99  |      |
| 1454 | G  | A  | RNR1 | Chi2 test         | 0.41 | Chi2 test         | 0.65 | Chi2 test         | 0.29 | Chi2 test         | 0.44 |
|      |    |    |      | adj p value=1     |      | adj p value=1     |      | adj p value=0.84  |      | adj p value=1     |      |
| 1460 | C  | T  | RNR1 | Chi2 test         | 0.43 | Chi2 test         | 0.73 | Chi2 test         | 0.3  | Chi2 test         | 0.42 |
|      |    |    |      | adj p value=1     |      | adj p value=1     |      | adj p value=0.75  |      | adj p value=1     |      |
| 1462 | G  | A  | RNR1 | Chi2 test         | 0.59 | Chi2 test         | 0.99 | Chi2 test         | 0.41 | Chi2 test         | 0.42 |
|      |    |    |      | adj p value=1     |      |
| 1466 | CC | TA | RNR1 | Fisher exact test | 0    | Fisher exact test | 0    | Fisher exact test | 0    | Fisher exact test |      |
|      |    |    |      | adj p value=0.74  |      | adj p value=1     |      | adj p value=1     |      | adj p value=1     |      |
| 1467 | C  | A  | RNR1 | Chi2 test         | 0.48 | Chi2 test         | 0.65 | Chi2 test         | 0.41 | Chi2 test         | 0.64 |
|      |    |    |      | adj p value=1     |      |
| 1469 | G  | A  | RNR1 | Fisher exact test | 0    | Fisher exact test | 0    | Fisher exact test | 0    | Fisher exact test |      |
|      |    |    |      | adj p value=0.74  |      | adj p value=1     |      | adj p value=1     |      | adj p value=1     |      |
| 1474 | G  | A  | RNR1 | Fisher exact test | 0.14 | Fisher exact test | 0.16 | Fisher exact test | 0.14 | Fisher exact test | 0.91 |
|      |    |    |      | adj p value=0.54  |      | adj p value=1     |      | adj p value=1     |      | adj p value=1     |      |
| 1476 | GT | AC | RNR1 | Fisher exact test | 0.1  | Fisher exact test | 0.23 | Fisher exact test | 0    | Fisher exact test | 0    |
|      |    |    |      | adj p value=0.72  |      | adj p value=1     |      | adj p value=1     |      | adj p value=0.99  |      |
| 1477 | T  | C  | RNR1 | Fisher exact test | 0    | Fisher exact test | 0    | Fisher exact test | 0    | Fisher exact test |      |
|      |    |    |      | adj p value=0.74  |      | adj p value=1     |      | adj p value=1     |      | adj p value=1     |      |

|      |       |     |      |                   |      |                   |      |                   |      |                   |      |
|------|-------|-----|------|-------------------|------|-------------------|------|-------------------|------|-------------------|------|
| 1485 | G     | A   | RNR1 | Fisher exact test | 0    | Fisher exact test | 0    | Fisher exact test | 0    | Fisher exact test |      |
|      |       |     |      | adj p value=0.74  |      | adj p value=1     |      | adj p value=1     |      | adj p value=1     |      |
| 1556 | C     | T   | RNR1 | Chi2 test         | 0.19 | Chi2 test         | 0.36 | Fisher exact test | 0.04 | Fisher exact test | 0.12 |
|      |       |     |      | adj p value=0.23  |      | adj p value=1     |      | adj p value=0.025 |      | adj p value=0.99  |      |
| 1597 | C     | T   | RNR1 | Fisher exact test | 0    | Fisher exact test | 0    | Fisher exact test | 0    | Fisher exact test |      |
|      |       |     |      | adj p value=0.12  |      | adj p value=1     |      | adj p value=0.46  |      | adj p value=1     |      |
| 1604 | GA    | AG  | TRNV | Fisher exact test | 0    | Fisher exact test | 0    | Fisher exact test | 0    | Fisher exact test |      |
|      |       |     |      | adj p value=0.19  |      | adj p value=1     |      | adj p value=0.71  |      | adj p value=1     |      |
| 1626 | C     | T   | TRNV | Fisher exact test | 0.08 | Fisher exact test | 0.19 | Fisher exact test | 0    | Fisher exact test | 0    |
|      |       |     |      | adj p value=0.49  |      | adj p value=1     |      | adj p value=0.71  |      | adj p value=0.99  |      |
| 1628 | CAA   | TGT | TRNV | Fisher exact test | 0    | Fisher exact test | 0    | Fisher exact test | 0    | Fisher exact test |      |
|      |       |     |      | adj p value=0.74  |      | adj p value=1     |      | adj p value=1     |      | adj p value=1     |      |
| 1637 | CTTAG | C   | TRNV | Fisher exact test | 0    | Fisher exact test | 0    | Fisher exact test | 0    | Fisher exact test |      |
|      | G     |     |      | adj p value=0.74  |      | adj p value=1     |      | adj p value=1     |      | adj p value=1     |      |
| 1642 | G     | A   | TRNV | Fisher exact test | 0    | Fisher exact test | 0    | Fisher exact test | 0    | Fisher exact test |      |
|      |       |     |      | adj p value=0.74  |      | adj p value=1     |      | adj p value=1     |      | adj p value=1     |      |
| 1651 | A     | C   | TRNV | Fisher exact test | 0    | Fisher exact test | 0    | Fisher exact test | 0    | Fisher exact test |      |
|      |       |     |      | adj p value=0.35  |      | adj p value=1     |      | adj p value=1     |      | adj p value=1     |      |
| 1653 | T     | A   | TRNV | Fisher exact test | 0.08 | Fisher exact test | 0.19 | Fisher exact test | 0    | Fisher exact test | 0    |

|      |    |    |      |                   |      |                   |      |                   |      |                   |      |
|------|----|----|------|-------------------|------|-------------------|------|-------------------|------|-------------------|------|
|      |    |    |      | adj p value=0.49  |      | adj p value=1     |      | adj p value=0.71  |      | adj p value=0.99  |      |
| 1654 | T  | C  | TRNV | Chi2 test         | 0.35 | Chi2 test         | 0.68 | Fisher exact test | 0.07 | Fisher exact test | 0.1  |
|      |    |    |      | adj p value=1     |      | adj p value=1     |      | adj p value=0.16  |      | adj p value=0.99  |      |
| 1657 | C  | T  | TRNV | Fisher exact test | 0    | Fisher exact test | 0    | Fisher exact test | 0    | Fisher exact test |      |
|      |    |    |      | adj p value=0.19  |      | adj p value=1     |      | adj p value=0.71  |      | adj p value=1     |      |
| 1664 | G  | A  | TRNV | Chi2 test         | 0.29 | Chi2 test         | 0.72 | Fisher exact test | 0    | Fisher exact test | 0    |
|      |    |    |      | adj p value=1     |      | adj p value=1     |      | adj p value=0.12  |      | adj p value=0.73  |      |
| 1666 | TC | CT | TRNV | Fisher exact test | 0    | Fisher exact test | 0    | Fisher exact test | 0    | Fisher exact test |      |
|      |    |    |      | adj p value=0.74  |      | adj p value=1     |      | adj p value=1     |      | adj p value=1     |      |
| 1673 | T  | C  | RNR2 | Chi2 test         | 0.35 | Chi2 test         | 0.68 | Fisher exact test | 0.07 | Fisher exact test | 0.1  |
|      |    |    |      | adj p value=1     |      | adj p value=1     |      | adj p value=0.16  |      | adj p value=0.99  |      |
| 1693 | C  | T  | RNR2 | Fisher exact test | 0.18 | Fisher exact test | 0.21 | Fisher exact test | 0.09 | Fisher exact test | 0.44 |
|      |    |    |      | adj p value=0.39  |      | adj p value=1     |      | adj p value=0.35  |      | adj p value=1     |      |
| 1808 | AT | GC | RNR2 | Fisher exact test | 0.08 | Fisher exact test | 0.19 | Fisher exact test | 0    | Fisher exact test | 0    |
|      |    |    |      | adj p value=0.49  |      | adj p value=1     |      | adj p value=0.71  |      | adj p value=0.99  |      |
| 1824 | T  | C  | RNR2 | Fisher exact test | 0.21 | Fisher exact test | 0.37 | Fisher exact test | 0.1  | Fisher exact test | 0.28 |
|      |    |    |      | adj p value=0.58  |      | adj p value=1     |      | adj p value=0.53  |      | adj p value=0.99  |      |
| 1874 | A  | T  | RNR2 | Fisher exact test | 0.1  | Fisher exact test | 0.23 | Fisher exact test | 0    | Fisher exact test | 0    |
|      |    |    |      | adj p value=0.72  |      | adj p value=1     |      | adj p value=1     |      | adj p value=0.99  |      |

|      |    |    |      |                   |      |                   |      |                   |      |                   |      |
|------|----|----|------|-------------------|------|-------------------|------|-------------------|------|-------------------|------|
| 1882 | AG | TA | RNR2 | Fisher exact test | 0.1  | Fisher exact test | 0.23 | Fisher exact test | 0    | Fisher exact test | 0    |
|      |    |    |      | adj p value=0.72  |      | adj p value=1     |      | adj p value=1     |      | adj p value=0.99  |      |
| 1883 | G  | A  | RNR2 | Chi2 test         | 0.31 | Chi2 test         | 0.5  | Fisher exact test | 0.13 | Fisher exact test | 0.26 |
|      |    |    |      | adj p value=1     |      | adj p value=1     |      | adj p value=0.32  |      | adj p value=0.99  |      |
| 1888 | G  | A  | RNR2 | Chi2 test         | 0.41 | Chi2 test         | 0.83 | Fisher exact test | 0.14 | Fisher exact test | 0.17 |
|      |    |    |      | adj p value=1     |      | adj p value=1     |      | adj p value=0.19  |      | adj p value=0.99  |      |
| 1896 | T  | C  | RNR2 | Fisher exact test | 0.18 | Fisher exact test | 0.21 | Fisher exact test | 0.09 | Fisher exact test | 0.44 |
|      |    |    |      | adj p value=0.39  |      | adj p value=1     |      | adj p value=0.35  |      | adj p value=1     |      |
| 1900 | A  | G  | RNR2 | Fisher exact test | 0.14 | Fisher exact test | 0.16 | Fisher exact test | 0.07 | Fisher exact test | 0.44 |
|      |    |    |      | adj p value=0.16  |      | adj p value=1     |      | adj p value=0.16  |      | adj p value=1     |      |
| 1905 | CG | TA | RNR2 | Fisher exact test | 0.05 | Fisher exact test | 0.11 | Fisher exact test | 0    | Fisher exact test | 0    |
|      |    |    |      | adj p value=0.1   |      | adj p value=1     |      | adj p value=0.19  |      | adj p value=0.99  |      |
| 1924 | T  | C  | RNR2 | Chi2 test         | 0.25 | Fisher exact test | 0.39 | Fisher exact test | 0.08 | Fisher exact test | 0.2  |
|      |    |    |      | adj p value=0.85  |      | adj p value=1     |      | adj p value=0.24  |      | adj p value=0.99  |      |
| 1934 | T  | G  | RNR2 | Fisher exact test | 0.09 | Fisher exact test | 0.1  | Fisher exact test | 0    | Fisher exact test | 0    |
|      |    |    |      | adj p value=0.12  |      | adj p value=1     |      | adj p value=0.12  |      | adj p value=0.99  |      |
| 1949 | G  | A  | RNR2 | Fisher exact test | 0.14 | Fisher exact test | 0.13 | Fisher exact test | 0.06 | Fisher exact test | 0.44 |
|      |    |    |      | adj p value=0.1   |      | adj p value=1     |      | adj p value=0.093 |      | adj p value=1     |      |
| 1959 | C  | T  | RNR2 | Fisher exact test | 0.16 | Fisher exact test | 0    | Fisher exact test | 0.1  | Fisher exact test |      |

|      |       |      |      |                   |      |                   |      |                   |      |                   |      |
|------|-------|------|------|-------------------|------|-------------------|------|-------------------|------|-------------------|------|
|      |       |      |      | adj p value=0.45  |      | adj p value=1     |      | adj p value=0.53  |      | adj p value=1     |      |
| 1971 | A     | G    | RNR2 | Fisher exact test | 0.12 | Fisher exact test | 0    | Fisher exact test | 0    | Fisher exact test |      |
|      |       |      |      | adj p value=0.33  |      | adj p value=1     |      | adj p value=0.28  |      | adj p value=1     |      |
| 1975 | T     | A    | RNR2 | Fisher exact test | 0.1  | Fisher exact test | 0    | Fisher exact test | 0    | Fisher exact test |      |
|      |       |      |      | adj p value=0.72  |      | adj p value=1     |      | adj p value=1     |      | adj p value=1     |      |
| 1977 | T     | C    | RNR2 | Chi2 test         | 0.35 | Chi2 test         | 0.58 | Fisher exact test | 0.1  | Fisher exact test | 0.18 |
|      |       |      |      | adj p value=1     |      | adj p value=1     |      | adj p value=0.15  |      | adj p value=0.99  |      |
| 1979 | TAGGT | T    | RNR2 | Fisher exact test | 0    | Fisher exact test | 0    | Fisher exact test | 0    | Fisher exact test |      |
|      | A     |      |      | adj p value=0.19  |      | adj p value=1     |      | adj p value=0.71  |      | adj p value=1     |      |
| 1986 | A     | T    | RNR2 | Fisher exact test | 0.21 | Fisher exact test | 0.16 | Fisher exact test | 0    | Fisher exact test | 0    |
|      |       |      |      | adj p value=0.74  |      | adj p value=1     |      | adj p value=0.46  |      | adj p value=0.99  |      |
| 1987 | G     | GCA  | RNR2 | Fisher exact test | 0    | Fisher exact test | 0    | Fisher exact test | 0    | Fisher exact test |      |
|      |       |      |      | adj p value=0.19  |      | adj p value=1     |      | adj p value=0.71  |      | adj p value=1     |      |
| 1989 | C     | CAGT | RNR2 | Fisher exact test | 0    | Fisher exact test | 0    | Fisher exact test | 0    | Fisher exact test |      |
|      |       |      |      | adj p value=0.19  |      | adj p value=1     |      | adj p value=0.71  |      | adj p value=1     |      |
| 1989 | C     | T    | RNR2 | Chi2 test         | 0.21 | Fisher exact test | 0.2  | Fisher exact test | 0.12 | Fisher exact test | 0.58 |
|      |       |      |      | adj p value=0.34  |      | adj p value=1     |      | adj p value=0.22  |      | adj p value=1     |      |
| 1992 | C     | T    | RNR2 | Fisher exact test | 0.1  | Fisher exact test | 0.11 | Fisher exact test | 0    | Fisher exact test | 0    |
|      |       |      |      | adj p value=0.19  |      | adj p value=1     |      | adj p value=0.19  |      | adj p value=0.99  |      |



|      |    |    |      |                   |      |                   |      |                   |      |                   |      |
|------|----|----|------|-------------------|------|-------------------|------|-------------------|------|-------------------|------|
| 1994 | AA | CG | RNR2 | Fisher exact test | 0    | Fisher exact test | 0    | Fisher exact test | 0    | Fisher exact test |      |
|      |    |    |      | adj p value=0.35  |      | adj p value=1     |      | adj p value=1     |      | adj p value=1     |      |
| 1995 | A  | G  | RNR2 | Chi2 test         | 0.24 | Fisher exact test | 0.27 | Fisher exact test | 0.12 | Fisher exact test | 0.42 |
|      |    |    |      | adj p value=0.53  |      | adj p value=1     |      | adj p value=0.22  |      | adj p value=0.99  |      |
| 1999 | A  | C  | RNR2 | Fisher exact test | 0    | Fisher exact test | 0    | Fisher exact test | 0    | Fisher exact test |      |
|      |    |    |      | adj p value=0.35  |      | adj p value=1     |      | adj p value=1     |      | adj p value=1     |      |
| 2001 | C  | T  | RNR2 | Fisher exact test | 0.1  | Fisher exact test | 0    | Fisher exact test | 0    | Fisher exact test |      |
|      |    |    |      | adj p value=0.72  |      | adj p value=1     |      | adj p value=1     |      | adj p value=1     |      |
| 2002 | G  | A  | RNR2 | Fisher exact test | 0.14 | Fisher exact test | 0.16 | Fisher exact test | 0.14 | Fisher exact test | 0.91 |
|      |    |    |      | adj p value=0.54  |      | adj p value=1     |      | adj p value=1     |      | adj p value=1     |      |
| 2008 | G  | A  | RNR2 | Fisher exact test | 0.1  | Fisher exact test | 0    | Fisher exact test | 0    | Fisher exact test |      |
|      |    |    |      | adj p value=0.72  |      | adj p value=1     |      | adj p value=1     |      | adj p value=1     |      |
| 2016 | CT | C  | RNR2 | Fisher exact test | 0    | Fisher exact test | 0    | Fisher exact test | 0    | Fisher exact test |      |
|      |    |    |      | adj p value=0.35  |      | adj p value=1     |      | adj p value=1     |      | adj p value=1     |      |
| 2030 | T  | C  | RNR2 | Chi2 test         | 0.45 | Chi2 test         | 0.97 | Fisher exact test | 0    | Fisher exact test | 0    |
|      |    |    |      | adj p value=1     |      | adj p value=1     |      | adj p value=0.28  |      | adj p value=0.73  |      |
| 2053 | T  | C  | RNR2 | Fisher exact test | 0.17 | Fisher exact test | 0.19 | Fisher exact test | 0    | Fisher exact test | 0    |
|      |    |    |      | adj p value=0.74  |      | adj p value=1     |      | adj p value=0.71  |      | adj p value=0.99  |      |
| 2056 | G  | A  | RNR2 | Chi2 test         | 0.31 | Chi2 test         | 0.72 | Fisher exact test | 0.09 | Fisher exact test | 0.13 |

|      |      |      |      |                   |      |                   |      |                   |      |                   |      |
|------|------|------|------|-------------------|------|-------------------|------|-------------------|------|-------------------|------|
|      |      |      |      | adj p value=0.85  |      | adj p value=1     |      | adj p value=0.092 |      | adj p value=0.73  |      |
| 2059 | C    | T    | RNR2 | Chi2 test         | 0.44 | Chi2 test         | 1    | Fisher exact test | 0.13 | Fisher exact test | 0.13 |
|      |      |      |      | adj p value=1     |      | adj p value=1     |      | adj p value=0.32  |      | adj p value=0.73  |      |
| 2065 | ACCC | A    | RNR2 | Fisher exact test | 0.1  | Fisher exact test | 0    | Fisher exact test | 0.21 | Fisher exact test |      |
|      |      |      |      | adj p value=0.72  |      | adj p value=1     |      | adj p value=1     |      | adj p value=1     |      |
| 2071 | T    | C    | RNR2 | Fisher exact test | 0.23 | Fisher exact test | 0.45 | Fisher exact test | 0.09 | Fisher exact test | 0.2  |
|      |      |      |      | adj p value=0.62  |      | adj p value=1     |      | adj p value=0.35  |      | adj p value=0.99  |      |
| 2080 | T    | C    | RNR2 | Chi2 test         | 0.2  | Fisher exact test | 0.4  | Fisher exact test | 0.06 | Fisher exact test | 0.16 |
|      |      |      |      | adj p value=0.34  |      | adj p value=1     |      | adj p value=0.16  |      | adj p value=0.99  |      |
| 2162 | C    | T    | RNR2 | Chi2 test         | 0.45 | Chi2 test         | 0.77 | Fisher exact test | 0.25 | Fisher exact test | 0.33 |
|      |      |      |      | adj p value=1     |      | adj p value=1     |      | adj p value=1     |      | adj p value=0.99  |      |
| 2168 | T    | C    | RNR2 | Fisher exact test | 0.14 | Fisher exact test | 0.16 | Fisher exact test | 0.14 | Fisher exact test | 0.91 |
|      |      |      |      | adj p value=0.54  |      | adj p value=1     |      | adj p value=1     |      | adj p value=1     |      |
| 2218 | C    | CTGT | RNR2 | Fisher exact test | 0.26 | Fisher exact test | 0.39 | Fisher exact test | 0.17 | Fisher exact test | 0.44 |
|      |      |      |      | adj p value=0.74  |      | adj p value=1     |      | adj p value=1     |      | adj p value=1     |      |
| 2220 | AC   | A    | RNR2 | Chi2 test         | 0.28 | Chi2 test         | 0.65 | Fisher exact test | 0.06 | Fisher exact test | 0.09 |
|      |      |      |      | adj p value=0.74  |      | adj p value=1     |      | adj p value=0.093 |      | adj p value=0.79  |      |
| 2222 | TA   | T    | RNR2 | Chi2 test         | 0.3  | Chi2 test         | 0.77 | Fisher exact test | 0    | Fisher exact test | 0    |
|      |      |      |      | adj p value=1     |      | adj p value=1     |      | adj p value=0.082 |      | adj p value=0.51  |      |

|      |     |     |      |                   |      |                   |      |                    |      |                   |      |
|------|-----|-----|------|-------------------|------|-------------------|------|--------------------|------|-------------------|------|
| 2222 | TAC | T   | RNR2 | Fisher exact test | 0.17 | Fisher exact test | 0.19 | Fisher exact test  | 0.17 | Fisher exact test | 0.91 |
|      |     |     |      | adj p value=0.74  |      | adj p value=1     |      | adj p value=1      |      | adj p value=1     |      |
| 2224 | C   | CGT | RNR2 | Chi2 test         | 0.3  | Chi2 test         | 0.77 | Fisher exact test  | 0    | Fisher exact test | 0    |
|      |     |     |      | adj p value=1     |      | adj p value=1     |      | adj p value=0.082  |      | adj p value=0.51  |      |
| 2242 | T   | C   | RNR2 | Chi2 test         | 0.35 | Fisher exact test | 0.51 | Fisher exact test  | 0.16 | Fisher exact test | 0.32 |
|      |     |     |      | adj p value=1     |      | adj p value=1     |      | adj p value=0.72   |      | adj p value=0.99  |      |
| 2244 | T   | C   | RNR2 | Chi2 test         | 0.3  | Chi2 test         | 0.77 | Fisher exact test  | 0    | Fisher exact test | 0    |
|      |     |     |      | adj p value=1     |      | adj p value=1     |      | adj p value=0.082  |      | adj p value=0.51  |      |
| 2251 | A   | G   | RNR2 | Chi2 test         | 0.25 | Chi2 test         | 0.64 | Fisher exact test  | 0    | Fisher exact test | 0    |
|      |     |     |      | adj p value=0.85  |      | adj p value=1     |      | adj p value=0.082  |      | adj p value=0.73  |      |
| 2257 | C   | T   | RNR2 | Chi2 test         | 0.25 | Chi2 test         | 0.64 | Fisher exact test  | 0    | Fisher exact test | 0    |
|      |     |     |      | adj p value=0.85  |      | adj p value=1     |      | adj p value=0.082  |      | adj p value=0.73  |      |
| 2257 | CA  | TG  | RNR2 | Fisher exact test | 0.17 | Fisher exact test | 0.39 | Fisher exact test  | 0    | Fisher exact test | 0    |
|      |     |     |      | adj p value=0.74  |      | adj p value=1     |      | adj p value=0.71   |      | adj p value=0.99  |      |
| 2262 | C   | T   | RNR2 | Fisher exact test | 0.27 | Fisher exact test | 0.67 | Fisher exact test  | 0    | Fisher exact test | 0    |
|      |     |     |      | adj p value=0.74  |      | adj p value=1     |      | adj p value=0.19   |      | adj p value=0.99  |      |
| 2280 | C   | T   | RNR2 | Chi2 test         | 0.22 | Chi2 test         | 0.58 | Fisher exact test  | 0    | Fisher exact test | 0    |
|      |     |     |      | adj p value=0.33  |      | adj p value=1     |      | adj p value=0.0064 |      | adj p value=0.35  |      |
| 2284 | C   | T   | RNR2 | Chi2 test         | 0.39 | Chi2 test         | 1.05 | Fisher exact test  | 0    | Fisher exact test | 0    |

|      |    |    |      |                   |      |                   |      |                   |      |                    |      |
|------|----|----|------|-------------------|------|-------------------|------|-------------------|------|--------------------|------|
|      |    |    |      | adj p value=1     |      | adj p value=1     |      | adj p value=0.12  |      | adj p value=0.35   |      |
| 2294 | A  | G  | RNR2 | Fisher exact test | 0.08 | Fisher exact test | 0    | Fisher exact test | 0.17 | Fisher exact test  |      |
|      |    |    |      | adj p value=0.49  |      | adj p value=1     |      | adj p value=1     |      | adj p value=1      |      |
| 2343 | G  | A  | RNR2 | Chi2 test         | 0.83 | Chi2 test         | 2.57 | Fisher exact test | 0.07 | Fisher exact test  | 0.03 |
|      |    |    |      | adj p value=1     |      | adj p value=1     |      | adj p value=0.16  |      | adj p value=0.0068 |      |
| 2345 | G  | A  | RNR2 | Chi2 test         | 0.83 | Chi2 test         | 2.57 | Fisher exact test | 0.07 | Fisher exact test  | 0.03 |
|      |    |    |      | adj p value=1     |      | adj p value=1     |      | adj p value=0.16  |      | adj p value=0.0068 |      |
| 2351 | TT | CC | RNR2 | Chi2 test         | 0.83 | Chi2 test         | 2.57 | Fisher exact test | 0.07 | Fisher exact test  | 0.03 |
|      |    |    |      | adj p value=1     |      | adj p value=1     |      | adj p value=0.16  |      | adj p value=0.0068 |      |
| 2357 | C  | T  | RNR2 | Chi2 test         | 0.73 | Chi2 test         | 2.29 | Fisher exact test | 0.06 | Fisher exact test  | 0.03 |
|      |    |    |      | adj p value=1     |      | adj p value=1     |      | adj p value=0.16  |      | adj p value=0.0068 |      |
| 2359 | C  | T  | RNR2 | Chi2 test         | 0.8  | Chi2 test         | 2.23 | Fisher exact test | 0.08 | Fisher exact test  | 0.04 |
|      |    |    |      | adj p value=1     |      | adj p value=1     |      | adj p value=0.24  |      | adj p value=0.038  |      |
| 2361 | G  | A  | RNR2 | Chi2 test         | 0.99 | Chi2 test         | 2.9  | Fisher exact test | 0.09 | Fisher exact test  | 0.03 |
|      |    |    |      | adj p value=1     |      | adj p value=1     |      | adj p value=0.35  |      | adj p value=0.016  |      |

|      |     |     |      |                   |      |                   |      |                   |      |                   |      |
|------|-----|-----|------|-------------------|------|-------------------|------|-------------------|------|-------------------|------|
| 2404 | T   | C   | RNR2 | Chi2 test         | 1.27 | Chi2 test         | 2.29 | Chi2 test         | 0.64 | Chi2 test         | 0.28 |
|      |     |     |      | adj p value=1     |      |
| 2423 | C   | T   | RNR2 | Chi2 test         | 1.27 | Chi2 test         | 2.29 | Chi2 test         | 0.54 | Chi2 test         | 0.24 |
|      |     |     |      | adj p value=1     |      | adj p value=1     |      | adj p value=1     |      | adj p value=0.96  |      |
| 2442 | T   | C   | RNR2 | Chi2 test         | 0.91 | Chi2 test         | 1.44 | Chi2 test         | 0.54 | Chi2 test         | 0.38 |
|      |     |     |      | adj p value=1     |      |
| 2445 | T   | C   | RNR2 | Chi2 test         | 1.06 | Chi2 test         | 1.56 | Chi2 test         | 0.57 | Chi2 test         | 0.37 |
|      |     |     |      | adj p value=1     |      |
| 2523 | C   | T   | RNR2 | Fisher exact test | 1.31 | Fisher exact test | 2.42 | Fisher exact test | 1.29 | Fisher exact test | 0.53 |
|      |     |     |      | adj p value=1     |      |
| 2525 | C   | T   | RNR2 | Chi2 test         | 2.54 | Fisher exact test | 2.24 | Fisher exact test | 5.34 | Fisher exact test | 2.38 |
|      |     |     |      | adj p value=1     |      | adj p value=1     |      | adj p value=0.75  |      | adj p value=0.99  |      |
| 2541 | CG  | C   | RNR2 | Chi2 test         | 0.62 | Chi2 test         | 0.92 | Chi2 test         | 0.42 | Chi2 test         | 0.46 |
|      |     |     |      | adj p value=1     |      |
| 2541 | C   | T   | RNR2 | Chi2 test         | 0.24 | Chi2 test         | 0.5  | Chi2 test         | 0.11 | Chi2 test         | 0.22 |
|      |     |     |      | adj p value=0.23  |      | adj p value=1     |      | adj p value=0.019 |      | adj p value=0.9   |      |
| 2541 | CGC | TAT | RNR2 | Fisher exact test | 0    | Fisher exact test | 0    | Fisher exact test | 0    | Fisher exact test |      |
|      |     |     |      | adj p value=0.59  |      | adj p value=1     |      | adj p value=1     |      | adj p value=1     |      |
| 2546 | G   | GTC | RNR2 | Fisher exact test | 0.1  | Fisher exact test | 0.23 | Fisher exact test | 0    | Fisher exact test | 0    |

|      |    |    |      |                   |      |                   |      |                    |      |                   |      |
|------|----|----|------|-------------------|------|-------------------|------|--------------------|------|-------------------|------|
|      |    |    |      | adj p value=0.72  |      | adj p value=1     |      | adj p value=1      |      | adj p value=0.99  |      |
| 2550 | A  | G  | RNR2 | Fisher exact test | 2.32 | Fisher exact test | 4.26 | Fisher exact test  | 2.28 | Fisher exact test | 0.53 |
|      |    |    |      | adj p value=0.74  |      | adj p value=1     |      | adj p value=1      |      | adj p value=1     |      |
| 2557 | C  | T  | RNR2 | Fisher exact test | 0.86 | Fisher exact test |      | Fisher exact test  | 0.41 | Fisher exact test | 0    |
|      |    |    |      | adj p value=1     |      | adj p value=1     |      | adj p value=1      |      | adj p value=1     |      |
| 2560 | G  | A  | RNR2 | Fisher exact test | 0    | Fisher exact test | 0    | Fisher exact test  | 0    | Fisher exact test |      |
|      |    |    |      | adj p value=0.062 |      | adj p value=1     |      | adj p value=0.28   |      | adj p value=1     |      |
| 2563 | T  | C  | RNR2 | Chi2 test         | 0.16 | Chi2 test         | 0.45 | Chi2 test          | 0.06 | Chi2 test         | 0.13 |
|      |    |    |      | adj p value=0.055 |      | adj p value=1     |      | adj p value=5e-04  |      | adj p value=0.19  |      |
| 2566 | C  | T  | RNR2 | Chi2 test         | 0.39 | Chi2 test         | 0.64 | Fisher exact test  | 0.25 | Fisher exact test | 0.4  |
|      |    |    |      | adj p value=1     |      | adj p value=1     |      | adj p value=1      |      | adj p value=0.99  |      |
| 2567 | G  | A  | RNR2 | Chi2 test         | 0.25 | Chi2 test         | 0.66 | Fisher exact test  | 0.06 | Fisher exact test | 0.08 |
|      |    |    |      | adj p value=0.28  |      | adj p value=1     |      | adj p value=0.0033 |      | adj p value=0.25  |      |
| 2569 | CC | TG | RNR2 | Fisher exact test | 0.1  | Fisher exact test | 0.23 | Fisher exact test  | 0    | Fisher exact test | 0    |
|      |    |    |      | adj p value=0.72  |      | adj p value=1     |      | adj p value=1      |      | adj p value=0.99  |      |
| 2570 | C  | T  | RNR2 | Chi2 test         | 0.25 | Chi2 test         | 0.35 | Fisher exact test  | 0.17 | Fisher exact test | 0.49 |
|      |    |    |      | adj p value=0.28  |      | adj p value=1     |      | adj p value=0.18   |      | adj p value=0.99  |      |
| 2571 | G  | A  | RNR2 | Chi2 test         | 0.31 | Chi2 test         | 0.78 | Fisher exact test  | 0.08 | Fisher exact test | 0.1  |
|      |    |    |      | adj p value=0.65  |      | adj p value=1     |      | adj p value=0.025  |      | adj p value=0.39  |      |

|      |    |    |      |                   |      |                   |      |                     |      |                   |      |
|------|----|----|------|-------------------|------|-------------------|------|---------------------|------|-------------------|------|
| 2572 | C  | T  | RNR2 | Chi2 test         | 0.16 | Chi2 test         | 0.42 | Fisher exact test   | 0    | Fisher exact test | 0    |
|      |    |    |      | adj p value=0.076 |      | adj p value=1     |      | adj p value=0.0012  |      | adj p value=0.35  |      |
| 2573 | G  | A  | RNR2 | Chi2 test         | 0.49 | Chi2 test         | 1.1  | Fisher exact test   | 0.14 | Fisher exact test | 0.13 |
|      |    |    |      | adj p value=1     |      | adj p value=1     |      | adj p value=0.19    |      | adj p value=0.51  |      |
| 2573 | G  | C  | RNR2 | Fisher exact test | 0.26 | Fisher exact test | 0.19 | Fisher exact test   | 0.17 | Fisher exact test | 0.91 |
|      |    |    |      | adj p value=0.74  |      | adj p value=1     |      | adj p value=1       |      | adj p value=1     |      |
| 2577 | C  | T  | RNR2 | Chi2 test         | 0.15 | Chi2 test         | 0.39 | Fisher exact test   | 0.05 | Fisher exact test | 0.12 |
|      |    |    |      | adj p value=0.037 |      | adj p value=1     |      | adj p value=6.6e-05 |      | adj p value=0.15  |      |
| 2581 | A  | G  | RNR2 | Chi2 test         | 0.19 | Chi2 test         | 0.6  | Chi2 test           | 0.06 | Chi2 test         | 0.1  |
|      |    |    |      | adj p value=0.15  |      | adj p value=1     |      | adj p value=5e-04   |      | adj p value=0.048 |      |
| 2588 | CA | C  | RNR2 | Fisher exact test | 0.1  | Fisher exact test | 0.23 | Fisher exact test   | 0    | Fisher exact test | 0    |
|      |    |    |      | adj p value=0.72  |      | adj p value=1     |      | adj p value=1       |      | adj p value=0.99  |      |
| 2589 | A  | G  | RNR2 | Fisher exact test | 0    | Fisher exact test | 0    | Fisher exact test   | 0    | Fisher exact test |      |
|      |    |    |      | adj p value=0.062 |      | adj p value=1     |      | adj p value=0.28    |      | adj p value=1     |      |
| 2590 | A  | C  | RNR2 | Fisher exact test | 0.1  | Fisher exact test | 0.23 | Fisher exact test   | 0    | Fisher exact test | 0    |
|      |    |    |      | adj p value=0.72  |      | adj p value=1     |      | adj p value=1       |      | adj p value=0.99  |      |
| 2612 | CT | TC | RNR2 | Fisher exact test | 0.08 | Fisher exact test | 0.19 | Fisher exact test   | 0    | Fisher exact test | 0    |
|      |    |    |      | adj p value=0.49  |      | adj p value=1     |      | adj p value=0.71    |      | adj p value=0.99  |      |
| 2613 | T  | C  | RNR2 | Chi2 test         | 0.18 | Chi2 test         | 0.31 | Fisher exact test   | 0.09 | Fisher exact test | 0.28 |

|      |     |    |      |                   |      |                   |      |                    |      |                   |      |
|------|-----|----|------|-------------------|------|-------------------|------|--------------------|------|-------------------|------|
|      |     |    |      | adj p value=0.057 |      | adj p value=1     |      | adj p value=0.0066 |      | adj p value=0.99  |      |
| 2617 | A   | G  | RNR2 | Fisher exact test | 0    | Fisher exact test | 0    | Fisher exact test  | 0    | Fisher exact test |      |
|      |     |    |      | adj p value=0.74  |      | adj p value=1     |      | adj p value=1      |      | adj p value=1     |      |
| 2625 | C   | T  | RNR2 | Fisher exact test | 0.15 | Fisher exact test |      | Fisher exact test  | 0.06 | Fisher exact test | 0    |
|      |     |    |      | adj p value=0.74  |      | adj p value=1     |      | adj p value=0.16   |      | adj p value=0.27  |      |
| 2628 | T   | A  | RNR2 | Fisher exact test | 0    | Fisher exact test | 0    | Fisher exact test  | 0    | Fisher exact test |      |
|      |     |    |      | adj p value=0.35  |      | adj p value=1     |      | adj p value=1      |      | adj p value=1     |      |
| 2636 | GCT | G  | RNR2 | Chi2 test         | 0.44 | Chi2 test         | 0.82 | Fisher exact test  | 0.15 | Fisher exact test | 0.18 |
|      |     |    |      | adj p value=1     |      | adj p value=1     |      | adj p value=0.5    |      | adj p value=0.99  |      |
| 2637 | C   | T  | RNR2 | Fisher exact test | 0    | Fisher exact test | 0    | Fisher exact test  | 0    | Fisher exact test |      |
|      |     |    |      | adj p value=0.12  |      | adj p value=1     |      | adj p value=0.46   |      | adj p value=1     |      |
| 2638 | TC  | CA | RNR2 | Fisher exact test | 0.14 | Fisher exact test | 0.25 | Fisher exact test  | 0.07 | Fisher exact test | 0.28 |
|      |     |    |      | adj p value=0.16  |      | adj p value=1     |      | adj p value=0.16   |      | adj p value=0.99  |      |
| 2639 | C   | A  | RNR2 | Fisher exact test | 0    | Fisher exact test | 0    | Fisher exact test  | 0    | Fisher exact test |      |
|      |     |    |      | adj p value=0.12  |      | adj p value=1     |      | adj p value=0.46   |      | adj p value=1     |      |
| 2642 | C   | T  | RNR2 | Fisher exact test | 0.06 | Fisher exact test | 0.14 | Fisher exact test  | 0    | Fisher exact test | 0    |
|      |     |    |      | adj p value=0.02  |      | adj p value=1     |      | adj p value=0.021  |      | adj p value=0.99  |      |
| 2643 | G   | A  | RNR2 | Chi2 test         | 0.29 | Chi2 test         | 0.72 | Fisher exact test  | 0    | Fisher exact test | 0    |
|      |     |    |      | adj p value=1     |      | adj p value=1     |      | adj p value=0.12   |      | adj p value=0.73  |      |



|      |     |    |      |                   |      |                   |      |                     |      |                     |      |
|------|-----|----|------|-------------------|------|-------------------|------|---------------------|------|---------------------|------|
| 2643 | G   | C  | RNR2 | Fisher exact test | 0    | Fisher exact test | 0    | Fisher exact test   | 0    | Fisher exact test   |      |
|      |     |    |      | adj p value=0.74  |      | adj p value=1     |      | adj p value=1       |      | adj p value=1       |      |
| 2645 | G   | A  | RNR2 | Fisher exact test | 0.08 | Fisher exact test | 0.19 | Fisher exact test   | 0    | Fisher exact test   | 0    |
|      |     |    |      | adj p value=0.49  |      | adj p value=1     |      | adj p value=0.71    |      | adj p value=0.99    |      |
| 2647 | G   | A  | RNR2 | Fisher exact test | 0    | Fisher exact test | 0    | Fisher exact test   | 0    | Fisher exact test   |      |
|      |     |    |      | adj p value=0.19  |      | adj p value=1     |      | adj p value=0.71    |      | adj p value=1       |      |
| 2655 | GTC | G  | RNR2 | Fisher exact test | 0    | Fisher exact test | 0    | Fisher exact test   | 0    | Fisher exact test   |      |
|      |     |    |      | adj p value=0.19  |      | adj p value=1     |      | adj p value=0.71    |      | adj p value=1       |      |
| 2666 | TT  | CC | RNR2 | Fisher exact test | 0.1  | Fisher exact test | 0.23 | Fisher exact test   | 0    | Fisher exact test   | 0    |
|      |     |    |      | adj p value=0.72  |      | adj p value=1     |      | adj p value=1       |      | adj p value=0.99    |      |
| 2667 | T   | C  | RNR2 | Fisher exact test | 0.04 | Fisher exact test | 0.76 | Fisher exact test   | 0.01 | Fisher exact test   | 0.01 |
|      |     |    |      | adj p value=0.021 |      | adj p value=1     |      | adj p value=1.1e-06 |      | adj p value=0.00011 |      |
| 2670 | C   | T  | RNR2 | Chi2 test         | 0.21 | Chi2 test         | 0.45 | Fisher exact test   | 0.06 | Fisher exact test   | 0.12 |
|      |     |    |      | adj p value=0.34  |      | adj p value=1     |      | adj p value=0.093   |      | adj p value=0.99    |      |
| 2679 | T   | C  | RNR2 | Chi2 test         | 0.31 | Chi2 test         | 0.61 | Fisher exact test   | 0.06 | Fisher exact test   | 0.1  |
|      |     |    |      | adj p value=1     |      | adj p value=1     |      | adj p value=0.16    |      | adj p value=0.99    |      |
| 2683 | C   | T  | RNR2 | Fisher exact test | 0    | Fisher exact test | 0    | Fisher exact test   | 0    | Fisher exact test   |      |
|      |     |    |      | adj p value=0.74  |      | adj p value=1     |      | adj p value=1       |      | adj p value=1       |      |

|      |     |    |      |                   |      |                   |      |                   |      |                   |      |
|------|-----|----|------|-------------------|------|-------------------|------|-------------------|------|-------------------|------|
| 2686 | G   | A  | RNR2 | Chi2 test         | 0.63 | Chi2 test         | 1.69 | Fisher exact test | 0.08 | Fisher exact test | 0.05 |
|      |     |    |      | adj p value=1     |      | adj p value=1     |      | adj p value=0.05  |      | adj p value=0.016 |      |
| 2686 | GC  | AT | RNR2 | Fisher exact test | 0.18 | Fisher exact test | 0.35 | Fisher exact test | 0.07 | Fisher exact test | 0.2  |
|      |     |    |      | adj p value=0.22  |      | adj p value=1     |      | adj p value=0.16  |      | adj p value=0.99  |      |
| 2690 | G   | A  | RNR2 | Fisher exact test | 0.27 | Fisher exact test | 0.67 | Fisher exact test | 0    | Fisher exact test | 0    |
|      |     |    |      | adj p value=0.74  |      | adj p value=1     |      | adj p value=0.19  |      | adj p value=0.99  |      |
| 2697 | GG  | AA | RNR2 | Fisher exact test | 0    | Fisher exact test | 0    | Fisher exact test | 0    | Fisher exact test |      |
|      |     |    |      | adj p value=0.35  |      | adj p value=1     |      | adj p value=1     |      | adj p value=1     |      |
| 2701 | GGC | G  | RNR2 | Fisher exact test | 0.21 | Fisher exact test | 0.39 | Fisher exact test | 0.08 | Fisher exact test | 0.2  |
|      |     |    |      | adj p value=0.49  |      | adj p value=1     |      | adj p value=0.24  |      | adj p value=0.99  |      |
| 2702 | GC  | AT | RNR2 | Fisher exact test | 0    | Fisher exact test | 0    | Fisher exact test | 0    | Fisher exact test |      |
|      |     |    |      | adj p value=0.74  |      | adj p value=1     |      | adj p value=1     |      | adj p value=1     |      |
| 2705 | T   | TG | RNR2 | Fisher exact test | 0.1  | Fisher exact test | 0.23 | Fisher exact test | 0    | Fisher exact test | 0    |
|      |     |    |      | adj p value=0.72  |      | adj p value=1     |      | adj p value=1     |      | adj p value=0.99  |      |
| 2706 | A   | G  | RNR2 | Fisher exact test | 0    | Fisher exact test | 0    | Fisher exact test |      | Fisher exact test |      |
|      |     |    |      | adj p value=0.97  |      | adj p value=1     |      | adj p value=1     |      | adj p value=0.99  |      |
| 2708 | C   | T  | RNR2 | Chi2 test         | 0.49 | Chi2 test         | 0.83 | Fisher exact test | 0.26 | Fisher exact test | 0.31 |
|      |     |    |      | adj p value=1     |      | adj p value=1     |      | adj p value=0.62  |      | adj p value=0.99  |      |
| 2709 | AC  | A  | RNR2 | Fisher exact test | 0.16 | Fisher exact test | 0.31 | Fisher exact test | 0.06 | Fisher exact test | 0.2  |

|      |     |             |      |                   |      |                   |      |                     |      |                     |      |
|------|-----|-------------|------|-------------------|------|-------------------|------|---------------------|------|---------------------|------|
|      |     |             |      | adj p value=0.16  |      | adj p value=1     |      | adj p value=0.16    |      | adj p value=0.99    |      |
| 2710 | C   | T           | RNR2 | Chi2 test         | 0.5  | Chi2 test         | 2.29 | Fisher exact test   | 0.04 | Fisher exact test   | 0.02 |
|      |     |             |      | adj p value=1     |      | adj p value=1     |      | adj p value=0.00068 |      | adj p value=5.6e-05 |      |
| 2712 | GC  | AT          | RNR2 | Fisher exact test | 0.23 | Fisher exact test | 0.45 | Fisher exact test   | 0.09 | Fisher exact test   | 0.2  |
|      |     |             |      | adj p value=0.62  |      | adj p value=1     |      | adj p value=0.35    |      | adj p value=0.99    |      |
| 2714 | A   | AA-<br>TAAG | RNR2 | Fisher exact test | 0    | Fisher exact test | 0    | Fisher exact test   | 0    | Fisher exact test   |      |
|      |     |             |      | adj p value=0.35  |      | adj p value=1     |      | adj p value=1       |      | adj p value=1       |      |
| 2717 | ACG | A           | RNR2 | Fisher exact test | 0    | Fisher exact test | 0    | Fisher exact test   | 0    | Fisher exact test   |      |
|      |     |             |      | adj p value=0.35  |      | adj p value=1     |      | adj p value=1       |      | adj p value=1       |      |
| 2718 | C   | T           | RNR2 | Fisher exact test | 0.25 | Fisher exact test | 0.6  | Fisher exact test   | 0    | Fisher exact test   | 0    |
|      |     |             |      | adj p value=0.74  |      | adj p value=1     |      | adj p value=0.28    |      | adj p value=0.99    |      |
| 2744 | T   | C           | RNR2 | Chi2 test         | 0.25 | Fisher exact test | 0.39 | Fisher exact test   | 0.16 | Fisher exact test   | 0.42 |
|      |     |             |      | adj p value=0.85  |      | adj p value=1     |      | adj p value=0.72    |      | adj p value=0.99    |      |
| 2778 | T   | C           | RNR2 | Chi2 test         | 0.31 | Fisher exact test | 0.35 | Fisher exact test   | 0.15 | Fisher exact test   | 0.42 |
|      |     |             |      | adj p value=1     |      | adj p value=1     |      | adj p value=0.5     |      | adj p value=0.99    |      |
| 2864 | TC  | AT          | RNR2 | Fisher exact test | 0    | Fisher exact test | 0    | Fisher exact test   | 0    | Fisher exact test   |      |
|      |     |             |      | adj p value=0.74  |      | adj p value=1     |      | adj p value=1       |      | adj p value=1       |      |
| 2868 | C   | A           | RNR2 | Fisher exact test | 0    | Fisher exact test | 0    | Fisher exact test   | 0    | Fisher exact test   |      |

|      |     |     |      |                   |      |                   |      |                   |   |                   |   |
|------|-----|-----|------|-------------------|------|-------------------|------|-------------------|---|-------------------|---|
|      |     |     |      | adj p value=0.59  |      | adj p value=1     |      | adj p value=1     |   | adj p value=1     |   |
| 2877 | C   | T   | RNR2 | Fisher exact test | 0    | Fisher exact test | 0    | Fisher exact test | 0 | Fisher exact test |   |
|      |     |     |      | adj p value=0.74  |      | adj p value=1     |      | adj p value=1     |   | adj p value=1     |   |
| 2881 | C   | T   | RNR2 | Fisher exact test | 0.25 | Fisher exact test | 0.6  | Fisher exact test | 0 | Fisher exact test | 0 |
|      |     |     |      | adj p value=0.74  |      | adj p value=1     |      | adj p value=0.28  |   | adj p value=0.99  |   |
| 2884 | CTA | C   | RNR2 | Fisher exact test | 0.18 | Fisher exact test | 0.43 | Fisher exact test | 0 | Fisher exact test | 0 |
|      |     |     |      | adj p value=0.59  |      | adj p value=1     |      | adj p value=0.28  |   | adj p value=0.99  |   |
| 2887 | T   | C   | RNR2 | Fisher exact test | 0.14 | Fisher exact test | 0.32 | Fisher exact test | 0 | Fisher exact test | 0 |
|      |     |     |      | adj p value=0.28  |      | adj p value=1     |      | adj p value=0.12  |   | adj p value=0.99  |   |
| 2889 | C   | CGT | RNR2 | Fisher exact test | 0.25 | Fisher exact test | 0.6  | Fisher exact test | 0 | Fisher exact test | 0 |
|      |     |     |      | adj p value=0.74  |      | adj p value=1     |      | adj p value=0.28  |   | adj p value=0.99  |   |
| 2891 | C   | T   | RNR2 | Fisher exact test | 0.25 | Fisher exact test | 0.6  | Fisher exact test | 0 | Fisher exact test | 0 |
|      |     |     |      | adj p value=0.74  |      | adj p value=1     |      | adj p value=0.28  |   | adj p value=0.99  |   |
| 2898 | T   | C   | RNR2 | Fisher exact test | 0.14 | Fisher exact test | 0.33 | Fisher exact test | 0 | Fisher exact test | 0 |
|      |     |     |      | adj p value=0.54  |      | adj p value=1     |      | adj p value=0.46  |   | adj p value=0.99  |   |
| 2911 | C   | T   | RNR2 | Fisher exact test | 0.1  | Fisher exact test | 0.23 | Fisher exact test | 0 | Fisher exact test | 0 |
|      |     |     |      | adj p value=0.72  |      | adj p value=1     |      | adj p value=1     |   | adj p value=0.99  |   |
| 2915 | C   | T   | RNR2 | Fisher exact test | 0    | Fisher exact test | 0    | Fisher exact test | 0 | Fisher exact test |   |
|      |     |     |      | adj p value=0.35  |      | adj p value=1     |      | adj p value=1     |   | adj p value=1     |   |

|      |    |    |      |                   |      |                   |      |                    |      |                   |   |
|------|----|----|------|-------------------|------|-------------------|------|--------------------|------|-------------------|---|
| 2920 | C  | T  | RNR2 | Fisher exact test | 0    | Fisher exact test | 0    | Fisher exact test  | 0    | Fisher exact test |   |
|      |    |    |      | adj p value=0.59  |      | adj p value=1     |      | adj p value=1      |      | adj p value=1     |   |
| 2933 | G  | T  | RNR2 | Fisher exact test | 0.06 | Fisher exact test | 0.13 | Fisher exact test  | 0    | Fisher exact test | 0 |
|      |    |    |      | adj p value=0.16  |      | adj p value=1     |      | adj p value=0.28   |      | adj p value=0.99  |   |
| 2942 | CG | TA | RNR2 | Fisher exact test | 0.06 | Fisher exact test | 0.13 | Fisher exact test  | 0    | Fisher exact test | 0 |
|      |    |    |      | adj p value=0.16  |      | adj p value=1     |      | adj p value=0.28   |      | adj p value=0.99  |   |
| 2953 | T  | A  | RNR2 | Fisher exact test | 0    | Fisher exact test | 0    | Fisher exact test  | 0    | Fisher exact test |   |
|      |    |    |      | adj p value=0.59  |      | adj p value=1     |      | adj p value=1      |      | adj p value=1     |   |
| 2958 | A  | G  | RNR2 | Fisher exact test | 0.05 | Fisher exact test | 0.11 | Fisher exact test  | 0    | Fisher exact test | 0 |
|      |    |    |      | adj p value=0.1   |      | adj p value=1     |      | adj p value=0.19   |      | adj p value=0.99  |   |
| 2964 | T  | C  | RNR2 | Fisher exact test | 0.05 | Fisher exact test | 0.11 | Fisher exact test  | 0    | Fisher exact test | 0 |
|      |    |    |      | adj p value=0.1   |      | adj p value=1     |      | adj p value=0.19   |      | adj p value=0.99  |   |
| 2968 | A  | G  | RNR2 | Fisher exact test | 0.1  | Fisher exact test | 0.26 | Fisher exact test  | 0    | Fisher exact test | 0 |
|      |    |    |      | adj p value=0.02  |      | adj p value=1     |      | adj p value=0.0026 |      | adj p value=0.99  |   |
| 2972 | A  | G  | RNR2 | Fisher exact test | 0.05 | Fisher exact test | 0.11 | Fisher exact test  | 0    | Fisher exact test | 0 |
|      |    |    |      | adj p value=0.1   |      | adj p value=1     |      | adj p value=0.19   |      | adj p value=0.99  |   |
| 2976 | G  | A  | RNR2 | Fisher exact test | 0.1  | Fisher exact test | 0    | Fisher exact test  | 0.21 | Fisher exact test |   |
|      |    |    |      | adj p value=0.72  |      | adj p value=1     |      | adj p value=1      |      | adj p value=1     |   |
| 2976 | GG | CA | RNR2 | Fisher exact test | 0.06 | Fisher exact test | 0.13 | Fisher exact test  | 0    | Fisher exact test | 0 |

|      |    |    |      |                   |      |                   |      |                    |      |                   |      |
|------|----|----|------|-------------------|------|-------------------|------|--------------------|------|-------------------|------|
|      |    |    |      | adj p value=0.16  |      | adj p value=1     |      | adj p value=0.28   |      | adj p value=0.99  |      |
| 2980 | T  | A  | RNR2 | Fisher exact test | 0.06 | Fisher exact test | 0.13 | Fisher exact test  | 0    | Fisher exact test | 0    |
|      |    |    |      | adj p value=0.16  |      | adj p value=1     |      | adj p value=0.28   |      | adj p value=0.99  |      |
| 2983 | G  | T  | RNR2 | Fisher exact test | 0    | Fisher exact test | 0    | Fisher exact test  | 0    | Fisher exact test |      |
|      |    |    |      | adj p value=0.74  |      | adj p value=1     |      | adj p value=1      |      | adj p value=1     |      |
| 2983 | G  | A  | RNR2 | Fisher exact test | 0.14 | Fisher exact test | 0.16 | Fisher exact test  | 0    | Fisher exact test | 0    |
|      |    |    |      | adj p value=0.54  |      | adj p value=1     |      | adj p value=0.46   |      | adj p value=0.99  |      |
| 2985 | C  | T  | RNR2 | Fisher exact test | 0.1  | Fisher exact test | 0.23 | Fisher exact test  | 0    | Fisher exact test | 0    |
|      |    |    |      | adj p value=0.72  |      | adj p value=1     |      | adj p value=1      |      | adj p value=0.99  |      |
| 3009 | CG | TA | RNR2 | Chi2 test         | 0.15 | Chi2 test         | 0.29 | Fisher exact test  | 0.06 | Fisher exact test | 0.21 |
|      |    |    |      | adj p value=0.037 |      | adj p value=1     |      | adj p value=0.0066 |      | adj p value=0.99  |      |
| 3016 | G  | GT | RNR2 | Fisher exact test | 0    | Fisher exact test | 0    | Fisher exact test  | 0    | Fisher exact test |      |
|      |    |    |      | adj p value=0.59  |      | adj p value=1     |      | adj p value=1      |      | adj p value=1     |      |
| 3017 | C  | T  | RNR2 | Chi2 test         | 0.18 | Chi2 test         | 0.32 | Fisher exact test  | 0.08 | Fisher exact test | 0.26 |
|      |    |    |      | adj p value=0.14  |      | adj p value=1     |      | adj p value=0.05   |      | adj p value=0.99  |      |
| 3018 | AG | A  | RNR2 | Fisher exact test | 0    | Fisher exact test | 0    | Fisher exact test  | 0    | Fisher exact test |      |
|      |    |    |      | adj p value=0.59  |      | adj p value=1     |      | adj p value=1      |      | adj p value=1     |      |
| 3029 | AA | GG | RNR2 | Fisher exact test | 0    | Fisher exact test | 0    | Fisher exact test  | 0    | Fisher exact test |      |
|      |    |    |      | adj p value=0.74  |      | adj p value=1     |      | adj p value=1      |      | adj p value=1     |      |

|      |     |   |      |                   |      |                   |      |                   |      |                   |      |
|------|-----|---|------|-------------------|------|-------------------|------|-------------------|------|-------------------|------|
| 3030 | A   | G | RNR2 | Fisher exact test | 0.16 | Fisher exact test | 0.4  | Fisher exact test | 0    | Fisher exact test | 0    |
|      |     |   |      | adj p value=0.16  |      | adj p value=1     |      | adj p value=0.021 |      | adj p value=0.99  |      |
| 3035 | C   | T | RNR2 | Fisher exact test | 0.14 | Fisher exact test | 0.16 | Fisher exact test | 0.14 | Fisher exact test | 0.91 |
|      |     |   |      | adj p value=0.54  |      | adj p value=1     |      | adj p value=1     |      | adj p value=1     |      |
| 3036 | G   | A | RNR2 | Fisher exact test | 0.14 | Fisher exact test | 0.33 | Fisher exact test | 0    | Fisher exact test | 0    |
|      |     |   |      | adj p value=0.54  |      | adj p value=1     |      | adj p value=0.46  |      | adj p value=0.99  |      |
| 3046 | C   | T | RNR2 | Chi2 test         | 0.19 | Chi2 test         | 0.36 | Fisher exact test | 0.09 | Fisher exact test | 0.26 |
|      |     |   |      | adj p value=0.23  |      | adj p value=1     |      | adj p value=0.092 |      | adj p value=0.99  |      |
| 3047 | G   | A | RNR2 | Fisher exact test | 0    | Fisher exact test | 0    | Fisher exact test | 0    | Fisher exact test |      |
|      |     |   |      | adj p value=0.74  |      | adj p value=1     |      | adj p value=1     |      | adj p value=1     |      |
| 3060 | C   | T | RNR2 | Fisher exact test | 0.14 | Fisher exact test | 0.21 | Fisher exact test | 0.09 | Fisher exact test | 0.44 |
|      |     |   |      | adj p value=0.28  |      | adj p value=1     |      | adj p value=0.35  |      | adj p value=1     |      |
| 3068 | G   | C | RNR2 | Fisher exact test | 0.18 | Fisher exact test | 0.28 | Fisher exact test | 0.12 | Fisher exact test | 0.44 |
|      |     |   |      | adj p value=0.59  |      | adj p value=1     |      | adj p value=0.75  |      | adj p value=1     |      |
| 3079 | G   | A | RNR2 | Chi2 test         | 0.25 | Fisher exact test | 0.51 | Fisher exact test | 0.08 | Fisher exact test | 0.16 |
|      |     |   |      | adj p value=0.85  |      | adj p value=1     |      | adj p value=0.24  |      | adj p value=0.99  |      |
| 3093 | C   | T | RNR2 | Fisher exact test | 0.1  | Fisher exact test | 0    | Fisher exact test | 0.21 | Fisher exact test |      |
|      |     |   |      | adj p value=0.72  |      | adj p value=1     |      | adj p value=1     |      | adj p value=1     |      |
| 3104 | TAC | T | RNR2 | Fisher exact test | 0    | Fisher exact test | 0    | Fisher exact test | 0    | Fisher exact test |      |

|      |    |    |       |                   |      |                   |      |                   |      |                   |      |
|------|----|----|-------|-------------------|------|-------------------|------|-------------------|------|-------------------|------|
|      |    |    |       | adj p value=0.74  |      | adj p value=1     |      | adj p value=1     |      | adj p value=1     |      |
| 3170 | C  | T  | RNR2  | Fisher exact test | 0    | Fisher exact test | 0    | Fisher exact test | 0    | Fisher exact test |      |
|      |    |    |       | adj p value=0.74  |      | adj p value=1     |      | adj p value=1     |      | adj p value=1     |      |
| 3176 | A  | G  | RNR2  | Fisher exact test | 0.14 | Fisher exact test | 0.16 | Fisher exact test | 0.14 | Fisher exact test | 0.91 |
|      |    |    |       | adj p value=0.54  |      | adj p value=1     |      | adj p value=1     |      | adj p value=1     |      |
| 3250 | T  | C  | TRNL1 | Chi2 test         | 0.25 | Fisher exact test | 0.39 | Fisher exact test | 0.08 | Fisher exact test | 0.2  |
|      |    |    |       | adj p value=0.85  |      | adj p value=1     |      | adj p value=0.24  |      | adj p value=0.99  |      |
| 3253 | T  | C  | TRNL1 | Fisher exact test | 0    | Fisher exact test | 0    | Fisher exact test | 0    | Fisher exact test |      |
|      |    |    |       | adj p value=0.74  |      | adj p value=1     |      | adj p value=1     |      | adj p value=1     |      |
| 3254 | C  | T  | TRNL1 | Fisher exact test | 0.21 | Fisher exact test | 0.39 | Fisher exact test | 0.08 | Fisher exact test | 0.2  |
|      |    |    |       | adj p value=0.49  |      | adj p value=1     |      | adj p value=0.24  |      | adj p value=0.99  |      |
| 3263 | C  | T  | TRNL1 | Fisher exact test | 0.1  | Fisher exact test | 0.23 | Fisher exact test | 0    | Fisher exact test | 0    |
|      |    |    |       | adj p value=0.72  |      | adj p value=1     |      | adj p value=1     |      | adj p value=0.99  |      |
| 3275 | C  | T  | TRNL1 | Fisher exact test | 0.12 | Fisher exact test | 0.13 | Fisher exact test | 0.12 | Fisher exact test | 0.91 |
|      |    |    |       | adj p value=0.33  |      | adj p value=1     |      | adj p value=0.75  |      | adj p value=1     |      |
| 3277 | G  | A  | TRNL1 | Fisher exact test | 0.14 | Fisher exact test | 0.16 | Fisher exact test | 0.14 | Fisher exact test | 0.91 |
|      |    |    |       | adj p value=0.54  |      | adj p value=1     |      | adj p value=1     |      | adj p value=1     |      |
| 3290 | TT | CC | TRNL1 | Fisher exact test | 0.1  | Fisher exact test | 0.23 | Fisher exact test | 0    | Fisher exact test | 0    |
|      |    |    |       | adj p value=0.72  |      | adj p value=1     |      | adj p value=1     |      | adj p value=0.99  |      |



|      |    |   |     |                   |      |                   |      |                   |   |                   |   |
|------|----|---|-----|-------------------|------|-------------------|------|-------------------|---|-------------------|---|
| 3342 | C  | T | ND1 | Fisher exact test | 0.08 | Fisher exact test | 0.19 | Fisher exact test | 0 | Fisher exact test | 0 |
|      |    |   |     | adj p value=0.49  |      | adj p value=1     |      | adj p value=0.71  |   | adj p value=0.99  |   |
| 3345 | T  | C | ND1 | Fisher exact test | 0    | Fisher exact test | 0    | Fisher exact test | 0 | Fisher exact test |   |
|      |    |   |     | adj p value=0.35  |      | adj p value=1     |      | adj p value=1     |   | adj p value=1     |   |
| 3565 | A  | C | ND1 | Fisher exact test | 0    | Fisher exact test | 0    | Fisher exact test | 0 | Fisher exact test |   |
|      |    |   |     | adj p value=0.59  |      | adj p value=1     |      | adj p value=1     |   | adj p value=1     |   |
| 3579 | A  | C | ND1 | Fisher exact test | 0    | Fisher exact test | 0    | Fisher exact test | 0 | Fisher exact test |   |
|      |    |   |     | adj p value=0.74  |      | adj p value=1     |      | adj p value=1     |   | adj p value=1     |   |
| 3687 | C  | T | ND1 | Fisher exact test | 0    | Fisher exact test | 0    | Fisher exact test | 0 | Fisher exact test |   |
|      |    |   |     | adj p value=0.74  |      | adj p value=1     |      | adj p value=1     |   | adj p value=1     |   |
| 3703 | C  | T | ND1 | Fisher exact test | 0    | Fisher exact test | 0    | Fisher exact test | 0 | Fisher exact test |   |
|      |    |   |     | adj p value=0.59  |      | adj p value=1     |      | adj p value=1     |   | adj p value=1     |   |
| 3954 | C  | T | ND1 | Fisher exact test | 0    | Fisher exact test | 0    | Fisher exact test | 0 | Fisher exact test |   |
|      |    |   |     | adj p value=0.59  |      | adj p value=1     |      | adj p value=1     |   | adj p value=1     |   |
| 4113 | G  | A | ND1 | Fisher exact test | 0    | Fisher exact test | 0    | Fisher exact test | 0 | Fisher exact test |   |
|      |    |   |     | adj p value=0.74  |      | adj p value=1     |      | adj p value=1     |   | adj p value=1     |   |
| 4498 | AC | A | ND2 | Fisher exact test | 0    | Fisher exact test | 0    | Fisher exact test | 0 | Fisher exact test |   |
|      |    |   |     | adj p value=0.74  |      | adj p value=1     |      | adj p value=1     |   | adj p value=1     |   |
| 4655 | G  | A | ND2 | Fisher exact test | 0    | Fisher exact test | 0    | Fisher exact test | 0 | Fisher exact test |   |

|      |    |   |      |                   |      |                   |      |                   |   |                   |   |
|------|----|---|------|-------------------|------|-------------------|------|-------------------|---|-------------------|---|
|      |    |   |      | adj p value=0.74  |      | adj p value=1     |      | adj p value=1     |   | adj p value=1     |   |
| 4847 | C  | T | ND2  | Fisher exact test |      | Fisher exact test |      | Fisher exact test |   | Fisher exact test | 0 |
|      |    |   |      | adj p value=0.74  |      | adj p value=1     |      | adj p value=1     |   | adj p value=0.99  |   |
| 4859 | T  | C | ND2  | Fisher exact test |      | Fisher exact test |      | Fisher exact test |   | Fisher exact test | 0 |
|      |    |   |      | adj p value=0.74  |      | adj p value=1     |      | adj p value=1     |   | adj p value=0.99  |   |
| 5262 | G  | A | ND2  | Fisher exact test | 0    | Fisher exact test | 0    | Fisher exact test | 0 | Fisher exact test |   |
|      |    |   |      | adj p value=0.74  |      | adj p value=1     |      | adj p value=1     |   | adj p value=1     |   |
| 5474 | A  | G | ND2  | Fisher exact test | 0.16 | Fisher exact test | 0.37 | Fisher exact test | 0 | Fisher exact test | 0 |
|      |    |   |      | adj p value=0.45  |      | adj p value=1     |      | adj p value=0.19  |   | adj p value=0.99  |   |
| 5648 | A  | G | TRNA | Fisher exact test | 0    | Fisher exact test | 0    | Fisher exact test | 0 | Fisher exact test |   |
|      |    |   |      | adj p value=0.74  |      | adj p value=1     |      | adj p value=1     |   | adj p value=1     |   |
| 5667 | G  | T | TRNN | Fisher exact test | 0.1  | Fisher exact test | 0.23 | Fisher exact test | 0 | Fisher exact test | 0 |
|      |    |   |      | adj p value=0.72  |      | adj p value=1     |      | adj p value=1     |   | adj p value=0.99  |   |
| 5681 | C  | T | TRNN | Fisher exact test | 0    | Fisher exact test | 0    | Fisher exact test | 0 | Fisher exact test |   |
|      |    |   |      | adj p value=0.35  |      | adj p value=1     |      | adj p value=1     |   | adj p value=1     |   |
| 5734 | T  | C | NA   | Fisher exact test | 0    | Fisher exact test | 0    | Fisher exact test | 0 | Fisher exact test |   |
|      |    |   |      | adj p value=0.74  |      | adj p value=1     |      | adj p value=1     |   | adj p value=1     |   |
| 5754 | GC | G | NA   | Fisher exact test | 0    | Fisher exact test | 0    | Fisher exact test | 0 | Fisher exact test |   |
|      |    |   |      | adj p value=0.74  |      | adj p value=1     |      | adj p value=1     |   | adj p value=1     |   |

|      |    |    |      |                   |      |                   |      |                   |      |                   |      |
|------|----|----|------|-------------------|------|-------------------|------|-------------------|------|-------------------|------|
| 5755 | CG | C  | NA   | Fisher exact test | 0    | Fisher exact test | 0    | Fisher exact test | 0    | Fisher exact test |      |
|      |    |    |      | adj p value=0.74  |      | adj p value=1     |      | adj p value=1     |      | adj p value=1     |      |
| 5768 | G  | A  | TRNC | Fisher exact test | 0    | Fisher exact test | 0    | Fisher exact test | 0    | Fisher exact test |      |
|      |    |    |      | adj p value=0.59  |      | adj p value=1     |      | adj p value=1     |      | adj p value=1     |      |
| 5774 | T  | A  | TRNC | Chi2 test         | 0.25 | Fisher exact test | 0.51 | Fisher exact test | 0.08 | Fisher exact test | 0.16 |
|      |    |    |      | adj p value=0.85  |      | adj p value=1     |      | adj p value=0.24  |      | adj p value=0.99  |      |
| 5781 | C  | G  | TRNC | Fisher exact test | 0    | Fisher exact test | 0    | Fisher exact test | 0    | Fisher exact test |      |
|      |    |    |      | adj p value=0.35  |      | adj p value=1     |      | adj p value=1     |      | adj p value=1     |      |
| 5790 | C  | T  | TRNC | Fisher exact test | 0.27 | Fisher exact test | 0.51 | Fisher exact test | 0.1  | Fisher exact test | 0.2  |
|      |    |    |      | adj p value=0.74  |      | adj p value=1     |      | adj p value=0.53  |      | adj p value=0.99  |      |
| 5806 | T  | C  | TRNC | Fisher exact test | 0.1  | Fisher exact test | 0.11 | Fisher exact test | 0.1  | Fisher exact test | 0.91 |
|      |    |    |      | adj p value=0.19  |      | adj p value=1     |      | adj p value=0.53  |      | adj p value=1     |      |
| 5810 | A  | AG | TRNC | Fisher exact test | 0    | Fisher exact test | 0    | Fisher exact test | 0    | Fisher exact test |      |
|      |    |    |      | adj p value=0.74  |      | adj p value=1     |      | adj p value=1     |      | adj p value=1     |      |
| 5821 | G  | A  | TRNC | Chi2 test         | 0.35 | Chi2 test         | 0.77 | Fisher exact test | 0.12 | Fisher exact test | 0.15 |
|      |    |    |      | adj p value=1     |      | adj p value=1     |      | adj p value=0.22  |      | adj p value=0.99  |      |
| 5840 | C  | T  | TRNY | Chi2 test         | 0.39 | Chi2 test         | 1.09 | Fisher exact test | 0    | Fisher exact test | 0    |
|      |    |    |      | adj p value=1     |      | adj p value=1     |      | adj p value=0.082 |      | adj p value=0.21  |      |
| 5840 | C  | CT | TRNY | Fisher exact test | 0.1  | Fisher exact test | 0.23 | Fisher exact test | 0    | Fisher exact test | 0    |

|      |    |    |      |                   |      |                   |      |                   |      |                   |      |
|------|----|----|------|-------------------|------|-------------------|------|-------------------|------|-------------------|------|
|      |    |    |      | adj p value=0.72  |      | adj p value=1     |      | adj p value=1     |      | adj p value=0.99  |      |
| 5842 | A  | G  | TRNY | Fisher exact test | 0.07 | Fisher exact test | 0.16 | Fisher exact test | 0    | Fisher exact test | 0    |
|      |    |    |      | adj p value=0.28  |      | adj p value=1     |      | adj p value=0.46  |      | adj p value=0.99  |      |
| 5846 | C  | T  | TRNY | Fisher exact test | 0.07 | Fisher exact test | 0.16 | Fisher exact test | 0    | Fisher exact test | 0    |
|      |    |    |      | adj p value=0.28  |      | adj p value=1     |      | adj p value=0.46  |      | adj p value=0.99  |      |
| 6176 | TA | CG | COX1 | Fisher exact test | 0.17 | Fisher exact test | 0.39 | Fisher exact test | 0    | Fisher exact test | 0    |
|      |    |    |      | adj p value=0.74  |      | adj p value=1     |      | adj p value=0.71  |      | adj p value=0.99  |      |
| 6182 | G  | A  | COX1 | Fisher exact test | 0.12 | Fisher exact test | 0.28 | Fisher exact test | 0    | Fisher exact test | 0    |
|      |    |    |      | adj p value=0.15  |      | adj p value=1     |      | adj p value=0.082 |      | adj p value=0.99  |      |
| 6185 | T  | C  | COX1 | Fisher exact test | 0.05 | Fisher exact test | 0.06 | Fisher exact test | 0.06 | Fisher exact test | 0.91 |
|      |    |    |      | adj p value=0.012 |      | adj p value=1     |      | adj p value=0.093 |      | adj p value=1     |      |
| 6197 | C  | T  | COX1 | Fisher exact test | 0.07 | Fisher exact test | 0.16 | Fisher exact test | 0    | Fisher exact test | 0    |
|      |    |    |      | adj p value=0.28  |      | adj p value=1     |      | adj p value=0.46  |      | adj p value=0.99  |      |
| 6216 | T  | C  | COX1 | Fisher exact test | 0    | Fisher exact test | 0    | Fisher exact test | 0    | Fisher exact test |      |
|      |    |    |      | adj p value=0.74  |      | adj p value=1     |      | adj p value=1     |      | adj p value=1     |      |
| 6224 | C  | T  | COX1 | Fisher exact test | 0    | Fisher exact test | 0    | Fisher exact test | 0    | Fisher exact test |      |
|      |    |    |      | adj p value=0.74  |      | adj p value=1     |      | adj p value=1     |      | adj p value=1     |      |
| 6226 | CT | C  | COX1 | Fisher exact test | 0.1  | Fisher exact test | 0.23 | Fisher exact test | 0    | Fisher exact test | 0    |
|      |    |    |      | adj p value=0.72  |      | adj p value=1     |      | adj p value=1     |      | adj p value=0.99  |      |

|      |     |   |      |                   |      |                   |      |                   |      |                   |     |
|------|-----|---|------|-------------------|------|-------------------|------|-------------------|------|-------------------|-----|
| 6229 | TCC | T | COX1 | Fisher exact test | 0.1  | Fisher exact test | 0.23 | Fisher exact test | 0    | Fisher exact test | 0   |
|      |     |   |      | adj p value=0.72  |      | adj p value=1     |      | adj p value=1     |      | adj p value=0.99  |     |
| 6233 | A   | C | COX1 | Fisher exact test | 0.21 | Fisher exact test | 0.51 | Fisher exact test | 0    | Fisher exact test | 0   |
|      |     |   |      | adj p value=0.74  |      | adj p value=1     |      | adj p value=0.46  |      | adj p value=0.99  |     |
| 6236 | C   | T | COX1 | Fisher exact test | 0.12 | Fisher exact test | 0.28 | Fisher exact test | 0    | Fisher exact test | 0   |
|      |     |   |      | adj p value=0.33  |      | adj p value=1     |      | adj p value=0.28  |      | adj p value=0.99  |     |
| 6242 | C   | T | COX1 | Chi2 test         | 0.31 | Fisher exact test | 0.4  | Fisher exact test | 0.2  | Fisher exact test | 0.5 |
|      |     |   |      | adj p value=1     |      | adj p value=1     |      | adj p value=0.66  |      | adj p value=0.99  |     |
| 6251 | T   | C | COX1 | Fisher exact test | 0.06 | Fisher exact test | 0.13 | Fisher exact test | 0    | Fisher exact test | 0   |
|      |     |   |      | adj p value=0.16  |      | adj p value=1     |      | adj p value=0.28  |      | adj p value=0.99  |     |
| 6266 | A   | C | COX1 | Chi2 test         | 0.45 | Chi2 test         | 0.88 | Fisher exact test | 0.09 | Fisher exact test | 0.1 |
|      |     |   |      | adj p value=1     |      | adj p value=1     |      | adj p value=0.35  |      | adj p value=0.99  |     |
| 6266 | A   | T | COX1 | Fisher exact test | 0.08 | Fisher exact test | 0.19 | Fisher exact test | 0    | Fisher exact test | 0   |
|      |     |   |      | adj p value=0.49  |      | adj p value=1     |      | adj p value=0.71  |      | adj p value=0.99  |     |
| 6269 | A   | C | COX1 | Fisher exact test | 0.14 | Fisher exact test | 0.33 | Fisher exact test | 0    | Fisher exact test | 0   |
|      |     |   |      | adj p value=0.54  |      | adj p value=1     |      | adj p value=0.46  |      | adj p value=0.99  |     |
| 6326 | C   | T | COX1 | Fisher exact test | 0.13 | Fisher exact test | 0    | Fisher exact test | 0.27 | Fisher exact test |     |
|      |     |   |      | adj p value=0.74  |      | adj p value=1     |      | adj p value=1     |      | adj p value=1     |     |
| 6335 | C   | T | COX1 | Fisher exact test | 0.13 | Fisher exact test | 0    | Fisher exact test | 0.27 | Fisher exact test |     |

|      |   |   |      |                   |      |                   |      |                   |      |                   |      |
|------|---|---|------|-------------------|------|-------------------|------|-------------------|------|-------------------|------|
|      |   |   |      | adj p value=0.74  |      | adj p value=1     |      | adj p value=1     |      | adj p value=1     |      |
| 6353 | A | G | COX1 | Fisher exact test | 0.13 | Fisher exact test | 0    | Fisher exact test | 0.27 | Fisher exact test |      |
|      |   |   |      | adj p value=0.74  |      | adj p value=1     |      | adj p value=1     |      | adj p value=1     |      |
| 6356 | C | T | COX1 | Fisher exact test | 0.17 | Fisher exact test | 0.19 | Fisher exact test | 0.17 | Fisher exact test | 0.91 |
|      |   |   |      | adj p value=0.74  |      | adj p value=1     |      | adj p value=1     |      | adj p value=1     |      |
| 6452 | C | T | COX1 | Fisher exact test | 0.12 | Fisher exact test | 0.28 | Fisher exact test | 0    | Fisher exact test | 0    |
|      |   |   |      | adj p value=0.33  |      | adj p value=1     |      | adj p value=0.28  |      | adj p value=0.99  |      |
| 6488 | T | C | COX1 | Fisher exact test | 0.18 | Fisher exact test | 0.28 | Fisher exact test | 0.12 | Fisher exact test | 0.44 |
|      |   |   |      | adj p value=0.59  |      | adj p value=1     |      | adj p value=0.75  |      | adj p value=1     |      |
| 6494 | A | C | COX1 | Fisher exact test | 0.16 | Fisher exact test | 0.24 | Fisher exact test | 0.1  | Fisher exact test | 0.44 |
|      |   |   |      | adj p value=0.45  |      | adj p value=1     |      | adj p value=0.53  |      | adj p value=1     |      |
| 6497 | T | C | COX1 | Chi2 test         | 0.17 | Fisher exact test | 0.22 | Fisher exact test | 0.09 | Fisher exact test | 0.42 |
|      |   |   |      | adj p value=0.14  |      | adj p value=1     |      | adj p value=0.092 |      | adj p value=0.99  |      |
| 6500 | C | T | COX1 | Fisher exact test | 0.18 | Fisher exact test | 0.28 | Fisher exact test | 0.12 | Fisher exact test | 0.44 |
|      |   |   |      | adj p value=0.59  |      | adj p value=1     |      | adj p value=0.75  |      | adj p value=1     |      |
| 6503 | A | C | COX1 | Fisher exact test | 0    | Fisher exact test | 0    | Fisher exact test | 0    | Fisher exact test |      |
|      |   |   |      | adj p value=0.74  |      | adj p value=1     |      | adj p value=1     |      | adj p value=1     |      |
| 6509 | A | G | COX1 | Fisher exact test | 0.18 | Fisher exact test | 0.28 | Fisher exact test | 0.12 | Fisher exact test | 0.44 |
|      |   |   |      | adj p value=0.59  |      | adj p value=1     |      | adj p value=0.75  |      | adj p value=1     |      |

|      |   |   |      |                   |      |                   |      |                   |      |                   |      |
|------|---|---|------|-------------------|------|-------------------|------|-------------------|------|-------------------|------|
| 6521 | C | T | COX1 | Chi2 test         | 0.2  | Fisher exact test | 0.22 | Fisher exact test | 0.13 | Fisher exact test | 0.58 |
|      |   |   |      | adj p value=0.34  |      | adj p value=1     |      | adj p value=0.32  |      | adj p value=1     |      |
| 6524 | T | C | COX1 | Fisher exact test | 0.21 | Fisher exact test | 0.11 | Fisher exact test | 0.22 | Fisher exact test | 1.87 |
|      |   |   |      | adj p value=0.58  |      | adj p value=1     |      | adj p value=1     |      | adj p value=1     |      |
| 6528 | C | T | COX1 | Fisher exact test | 0.16 | Fisher exact test | 0.24 | Fisher exact test | 0.1  | Fisher exact test | 0.44 |
|      |   |   |      | adj p value=0.45  |      | adj p value=1     |      | adj p value=0.53  |      | adj p value=1     |      |
| 6530 | A | C | COX1 | Fisher exact test | 0    | Fisher exact test | 0    | Fisher exact test | 0    | Fisher exact test |      |
|      |   |   |      | adj p value=0.74  |      | adj p value=1     |      | adj p value=1     |      | adj p value=1     |      |
| 6531 | C | T | COX1 | Chi2 test         | 0.18 | Fisher exact test | 0.2  | Fisher exact test | 0.12 | Fisher exact test | 0.58 |
|      |   |   |      | adj p value=0.23  |      | adj p value=1     |      | adj p value=0.22  |      | adj p value=1     |      |
| 6551 | C | T | COX1 | Chi2 test         | 0.2  | Fisher exact test | 0.22 | Fisher exact test | 0.13 | Fisher exact test | 0.58 |
|      |   |   |      | adj p value=0.34  |      | adj p value=1     |      | adj p value=0.32  |      | adj p value=1     |      |
| 6563 | C | T | COX1 | Fisher exact test | 0.06 | Fisher exact test | 0    | Fisher exact test | 0.12 | Fisher exact test |      |
|      |   |   |      | adj p value=0.16  |      | adj p value=1     |      | adj p value=0.75  |      | adj p value=1     |      |
| 6566 | C | T | COX1 | Fisher exact test | 0.1  | Fisher exact test | 0    | Fisher exact test | 0.21 | Fisher exact test |      |
|      |   |   |      | adj p value=0.72  |      | adj p value=1     |      | adj p value=1     |      | adj p value=1     |      |
| 6571 | C | T | COX1 | Fisher exact test | 0.1  | Fisher exact test | 0    | Fisher exact test | 0.21 | Fisher exact test |      |
|      |   |   |      | adj p value=0.72  |      | adj p value=1     |      | adj p value=1     |      | adj p value=1     |      |
| 6578 | A | G | COX1 | Fisher exact test | 0.1  | Fisher exact test | 0.23 | Fisher exact test | 0    | Fisher exact test | 0    |

|      |   |   |      |                   |      |                   |      |                   |      |                   |      |
|------|---|---|------|-------------------|------|-------------------|------|-------------------|------|-------------------|------|
|      |   |   |      | adj p value=0.72  |      | adj p value=1     |      | adj p value=1     |      | adj p value=0.99  |      |
| 6665 | C | T | COX1 | Fisher exact test | 0.17 | Fisher exact test | 0.39 | Fisher exact test | 0    | Fisher exact test | 0    |
|      |   |   |      | adj p value=0.74  |      | adj p value=1     |      | adj p value=0.71  |      | adj p value=0.99  |      |
| 6812 | A | C | COX1 | Fisher exact test | 0.18 | Fisher exact test | 0.43 | Fisher exact test | 0    | Fisher exact test | 0    |
|      |   |   |      | adj p value=0.59  |      | adj p value=1     |      | adj p value=0.28  |      | adj p value=0.99  |      |
| 6815 | T | C | COX1 | Chi2 test         | 0.25 | Fisher exact test | 0.51 | Fisher exact test | 0.08 | Fisher exact test | 0.16 |
|      |   |   |      | adj p value=0.85  |      | adj p value=1     |      | adj p value=0.24  |      | adj p value=0.99  |      |
| 6824 | C | T | COX1 | Fisher exact test | 0.18 | Fisher exact test | 0.43 | Fisher exact test | 0    | Fisher exact test | 0    |
|      |   |   |      | adj p value=0.59  |      | adj p value=1     |      | adj p value=0.28  |      | adj p value=0.99  |      |
| 6830 | C | T | COX1 | Fisher exact test | 0.23 | Fisher exact test | 0.45 | Fisher exact test | 0.09 | Fisher exact test | 0.2  |
|      |   |   |      | adj p value=0.62  |      | adj p value=1     |      | adj p value=0.35  |      | adj p value=0.99  |      |
| 6836 | C | T | COX1 | Chi2 test         | 0.26 | Fisher exact test | 0.45 | Fisher exact test | 0.15 | Fisher exact test | 0.32 |
|      |   |   |      | adj p value=0.85  |      | adj p value=1     |      | adj p value=0.5   |      | adj p value=0.99  |      |
| 6848 | C | T | COX1 | Fisher exact test | 0.14 | Fisher exact test | 0.16 | Fisher exact test | 0.14 | Fisher exact test | 0.91 |
|      |   |   |      | adj p value=0.54  |      | adj p value=1     |      | adj p value=1     |      | adj p value=1     |      |
| 6851 | C | T | COX1 | Fisher exact test | 0.18 | Fisher exact test | 0.32 | Fisher exact test | 0.09 | Fisher exact test | 0.28 |
|      |   |   |      | adj p value=0.39  |      | adj p value=1     |      | adj p value=0.35  |      | adj p value=0.99  |      |
| 6860 | A | G | COX1 | Fisher exact test | 0.12 | Fisher exact test | 0.13 | Fisher exact test | 0.12 | Fisher exact test | 0.91 |
|      |   |   |      | adj p value=0.33  |      | adj p value=1     |      | adj p value=0.75  |      | adj p value=1     |      |



|      |   |      |      |                   |      |                   |      |                    |      |                   |      |
|------|---|------|------|-------------------|------|-------------------|------|--------------------|------|-------------------|------|
| 6863 | A | C    | COX1 | Fisher exact test | 0.12 | Fisher exact test | 0.13 | Fisher exact test  | 0.12 | Fisher exact test | 0.91 |
|      |   |      |      | adj p value=0.33  |      | adj p value=1     |      | adj p value=0.75   |      | adj p value=1     |      |
| 6873 | C | T    | COX1 | Fisher exact test | 0.07 | Fisher exact test | 0.16 | Fisher exact test  | 0    | Fisher exact test | 0    |
|      |   |      |      | adj p value=0.28  |      | adj p value=1     |      | adj p value=0.46   |      | adj p value=0.99  |      |
| 6875 | C | A    | COX1 | Fisher exact test | 0.07 | Fisher exact test | 0.16 | Fisher exact test  | 0    | Fisher exact test | 0    |
|      |   |      |      | adj p value=0.28  |      | adj p value=1     |      | adj p value=0.46   |      | adj p value=0.99  |      |
| 6878 | C | T    | COX1 | Chi2 test         | 0.25 | Chi2 test         | 0.68 | Fisher exact test  | 0.04 | Fisher exact test | 0.05 |
|      |   |      |      | adj p value=0.34  |      | adj p value=1     |      | adj p value=0.0066 |      | adj p value=0.25  |      |
| 6881 | A | C    | COX1 | Fisher exact test | 0.1  | Fisher exact test | 0.23 | Fisher exact test  | 0    | Fisher exact test | 0    |
|      |   |      |      | adj p value=0.72  |      | adj p value=1     |      | adj p value=1      |      | adj p value=0.99  |      |
| 6884 | C | G    | COX1 | Fisher exact test | 0.12 | Fisher exact test | 0.28 | Fisher exact test  | 0    | Fisher exact test | 0    |
|      |   |      |      | adj p value=0.33  |      | adj p value=1     |      | adj p value=0.28   |      | adj p value=0.99  |      |
| 6886 | A | ACGG | COX1 | Fisher exact test | 0.17 | Fisher exact test | 0.39 | Fisher exact test  | 0    | Fisher exact test | 0    |
|      |   |      |      | adj p value=0.74  |      | adj p value=1     |      | adj p value=0.71   |      | adj p value=0.99  |      |
| 6899 | G | C    | COX1 | Fisher exact test | 0.17 | Fisher exact test | 0.39 | Fisher exact test  | 0    | Fisher exact test | 0    |
|      |   |      |      | adj p value=0.74  |      | adj p value=1     |      | adj p value=0.71   |      | adj p value=0.99  |      |
| 6902 | A | G    | COX1 | Chi2 test         | 0.19 | Chi2 test         | 0.49 | Fisher exact test  | 0    | Fisher exact test | 0    |
|      |   |      |      | adj p value=0.23  |      | adj p value=1     |      | adj p value=0.0064 |      | adj p value=0.51  |      |
| 6909 | G | T    | COX1 | Fisher exact test | 0.1  | Fisher exact test | 0.23 | Fisher exact test  | 0    | Fisher exact test | 0    |

|      |   |   |      |                   |      |                   |      |                        |      |                   |      |
|------|---|---|------|-------------------|------|-------------------|------|------------------------|------|-------------------|------|
|      |   |   |      | adj p value=0.72  |      | adj p value=1     |      | adj p value=1          |      | adj p value=0.99  |      |
| 6915 | G | A | COX1 | Fisher exact test | 0.1  | Fisher exact test | 0.23 | Fisher exact test      | 0    | Fisher exact test | 0    |
|      |   |   |      | adj p value=0.72  |      | adj p value=1     |      | adj p value=1          |      | adj p value=0.99  |      |
| 6929 | A | G | COX1 | Chi2 test         | 0.44 | Chi2 test         | 0.86 | Fisher exact test      | 0.13 | Fisher exact test | 0.15 |
|      |   |   |      | adj p value=1     |      | adj p value=1     |      | adj p value=0.32       |      | adj p value=0.99  |      |
| 6932 | A | G | COX1 | Fisher exact test | 0.14 | Fisher exact test | 0.35 | Fisher exact test      | 0    | Fisher exact test | 0    |
|      |   |   |      | adj p value=0.16  |      | adj p value=1     |      | adj p value=0.042      |      | adj p value=0.99  |      |
| 6935 | C | T | COX1 | Fisher exact test | 0.21 | Fisher exact test | 0.39 | Fisher exact test      | 0.08 | Fisher exact test | 0.2  |
|      |   |   |      | adj p value=0.49  |      | adj p value=1     |      | adj p value=0.24       |      | adj p value=0.99  |      |
| 6938 | C | T | COX1 | Chi2 test         | 0.16 | Chi2 test         | 0.44 | Fisher exact test      | 0.03 | Fisher exact test | 0.06 |
|      |   |   |      | adj p value=0.035 |      | adj p value=1     |      | adj p value=3.6e-05    |      | adj p value=0.075 |      |
| 6944 | T | C | COX1 | Chi2 test         | 0.23 | Chi2 test         | 0.53 | Fisher exact test      | 0.03 | Fisher exact test | 0.06 |
|      |   |   |      | adj p value=0.23  |      | adj p value=1     |      | adj p value=0.0033     |      | adj p value=0.39  |      |
| 6950 | C | T | COX1 | Chi2 test         | 0.25 | Chi2 test         | 0.5  | Fisher exact test      | 0.08 | Fisher exact test | 0.15 |
|      |   |   |      | adj p value=0.34  |      | adj p value=1     |      | adj p value=0.025      |      | adj p value=0.99  |      |
| 6962 | G | A | COX1 | Chi2 test         | 0.19 | Chi2 test         | 0.52 | Fisher exact test      | 0.02 | Fisher exact test | 0.05 |
|      |   |   |      | adj p value=0.076 |      | adj p value=1     |      | adj p<br>value=0.00033 |      | adj p value=0.16  |      |
| 6965 | T | C | COX1 | Chi2 test         | 0.28 | Chi2 test         | 0.83 | Fisher exact test      | 0    | Fisher exact test | 0    |

|      |   |   |      |                   |      |                   |      |                    |      |                   |      |
|------|---|---|------|-------------------|------|-------------------|------|--------------------|------|-------------------|------|
|      |   |   |      | adj p value=0.6   |      | adj p value=1     |      | adj p value=0.0033 |      | adj p value=0.058 |      |
| 6975 | T | C | COX1 | Fisher exact test | 0.18 | Fisher exact test | 0.45 | Fisher exact test  | 0    | Fisher exact test | 0    |
|      |   |   |      | adj p value=0.39  |      | adj p value=1     |      | adj p value=0.12   |      | adj p value=0.99  |      |
| 6990 | C | T | COX1 | Fisher exact test | 0.07 | Fisher exact test | 0.16 | Fisher exact test  | 0    | Fisher exact test | 0    |
|      |   |   |      | adj p value=0.28  |      | adj p value=1     |      | adj p value=0.46   |      | adj p value=0.99  |      |
| 7007 | C | T | COX1 | Fisher exact test | 0.17 | Fisher exact test | 0.39 | Fisher exact test  | 0    | Fisher exact test | 0    |
|      |   |   |      | adj p value=0.74  |      | adj p value=1     |      | adj p value=0.71   |      | adj p value=0.99  |      |
| 7008 | G | T | COX1 | Fisher exact test | 0    | Fisher exact test | 0    | Fisher exact test  | 0    | Fisher exact test |      |
|      |   |   |      | adj p value=0.12  |      | adj p value=1     |      | adj p value=0.46   |      | adj p value=1     |      |
| 7013 | G | A | COX1 | Chi2 test         | 0.21 | Chi2 test         | 0.45 | Fisher exact test  | 0.07 | Fisher exact test | 0.15 |
|      |   |   |      | adj p value=0.19  |      | adj p value=1     |      | adj p value=0.013  |      | adj p value=0.99  |      |
| 7016 | C | T | COX1 | Fisher exact test | 0.1  | Fisher exact test | 0.23 | Fisher exact test  | 0    | Fisher exact test | 0    |
|      |   |   |      | adj p value=0.72  |      | adj p value=1     |      | adj p value=1      |      | adj p value=0.99  |      |
| 7022 | T | C | COX1 | Chi2 test         | 0.24 | Chi2 test         | 0.45 | Fisher exact test  | 0.12 | Fisher exact test | 0.26 |
|      |   |   |      | adj p value=0.53  |      | adj p value=1     |      | adj p value=0.22   |      | adj p value=0.99  |      |
| 7037 | C | T | COX1 | Fisher exact test | 0.14 | Fisher exact test | 0.33 | Fisher exact test  | 0    | Fisher exact test | 0    |
|      |   |   |      | adj p value=0.54  |      | adj p value=1     |      | adj p value=0.46   |      | adj p value=0.99  |      |
| 7040 | T | C | COX1 | Chi2 test         | 0.14 | Chi2 test         | 0.26 | Fisher exact test  | 0.07 | Fisher exact test | 0.26 |
|      |   |   |      | adj p value=0.037 |      | adj p value=1     |      | adj p value=0.013  |      | adj p value=0.99  |      |

|      |    |   |      |                   |      |                   |      |                   |      |                   |      |
|------|----|---|------|-------------------|------|-------------------|------|-------------------|------|-------------------|------|
| 7064 | T  | C | COX1 | Chi2 test         | 0.28 | Chi2 test         | 0.4  | Fisher exact test | 0.22 | Fisher exact test | 0.55 |
|      |    |   |      | adj p value=0.65  |      | adj p value=1     |      | adj p value=0.52  |      | adj p value=1     |      |
| 7072 | T  | C | COX1 | Fisher exact test | 0    | Fisher exact test | 0    | Fisher exact test | 0    | Fisher exact test |      |
|      |    |   |      | adj p value=0.35  |      | adj p value=1     |      | adj p value=1     |      | adj p value=1     |      |
| 7076 | A  | G | COX1 | Chi2 test         | 0.25 | Fisher exact test | 0.51 | Fisher exact test | 0.08 | Fisher exact test | 0.16 |
|      |    |   |      | adj p value=0.85  |      | adj p value=1     |      | adj p value=0.24  |      | adj p value=0.99  |      |
| 7094 | T  | C | COX1 | Fisher exact test | 0.17 | Fisher exact test | 0.39 | Fisher exact test | 0    | Fisher exact test | 0    |
|      |    |   |      | adj p value=0.74  |      | adj p value=1     |      | adj p value=0.71  |      | adj p value=0.99  |      |
| 7112 | C  | T | COX1 | Fisher exact test | 0.17 | Fisher exact test | 0.39 | Fisher exact test | 0    | Fisher exact test | 0    |
|      |    |   |      | adj p value=0.74  |      | adj p value=1     |      | adj p value=0.71  |      | adj p value=0.99  |      |
| 7133 | CA | C | COX1 | Fisher exact test | 0    | Fisher exact test | 0    | Fisher exact test | 0    | Fisher exact test |      |
|      |    |   |      | adj p value=0.59  |      | adj p value=1     |      | adj p value=1     |      | adj p value=1     |      |
| 7196 | C  | T | COX1 | Chi2 test         | 0.29 | Fisher exact test | 0.58 | Fisher exact test | 0.09 | Fisher exact test | 0.16 |
|      |    |   |      | adj p value=1     |      | adj p value=1     |      | adj p value=0.35  |      | adj p value=0.99  |      |
| 7205 | C  | T | COX1 | Chi2 test         | 0.34 | Fisher exact test | 0.58 | Fisher exact test | 0.09 | Fisher exact test | 0.16 |
|      |    |   |      | adj p value=1     |      | adj p value=1     |      | adj p value=0.35  |      | adj p value=0.99  |      |
| 7211 | G  | A | COX1 | Chi2 test         | 0.29 | Fisher exact test | 0.58 | Fisher exact test | 0.09 | Fisher exact test | 0.16 |
|      |    |   |      | adj p value=1     |      | adj p value=1     |      | adj p value=0.35  |      | adj p value=0.99  |      |
| 7244 | C  | T | COX1 | Fisher exact test | 0    | Fisher exact test | 0    | Fisher exact test | 0    | Fisher exact test |      |

|      |    |    |      |                   |      |                   |      |                   |       |                   |   |
|------|----|----|------|-------------------|------|-------------------|------|-------------------|-------|-------------------|---|
|      |    |    |      | adj p value=0.74  |      | adj p value=1     |      | adj p value=1     |       | adj p value=1     |   |
| 7259 | CC | TT | COX1 | Fisher exact test | 0    | Fisher exact test | 0    | Fisher exact test | 0     | Fisher exact test |   |
|      |    |    |      | adj p value=0.74  |      | adj p value=1     |      | adj p value=1     |       | adj p value=1     |   |
| 7424 | A  | G  | COX1 | Fisher exact test | 5.15 | Fisher exact test | 0    | Fisher exact test | 10.23 | Fisher exact test |   |
|      |    |    |      | adj p value=0.74  |      | adj p value=1     |      | adj p value=0.62  |       | adj p value=0.86  |   |
| 7621 | T  | C  | COX2 | Fisher exact test | 0    | Fisher exact test | 0    | Fisher exact test | 0     | Fisher exact test |   |
|      |    |    |      | adj p value=0.74  |      | adj p value=1     |      | adj p value=1     |       | adj p value=1     |   |
| 7861 | T  | C  | COX2 | Fisher exact test | 0    | Fisher exact test | 0    | Fisher exact test | 0     | Fisher exact test |   |
|      |    |    |      | adj p value=0.74  |      | adj p value=1     |      | adj p value=1     |       | adj p value=1     |   |
| 7868 | C  | T  | COX2 | Fisher exact test | 0.16 | Fisher exact test | 0.37 | Fisher exact test | 0     | Fisher exact test | 0 |
|      |    |    |      | adj p value=0.45  |      | adj p value=1     |      | adj p value=0.19  |       | adj p value=0.99  |   |
| 8011 | A  | G  | COX2 | Fisher exact test | 0    | Fisher exact test | 0    | Fisher exact test | 0     | Fisher exact test |   |
|      |    |    |      | adj p value=0.74  |      | adj p value=1     |      | adj p value=1     |       | adj p value=1     |   |
| 8021 | A  | G  | COX2 | Fisher exact test | 0.18 | Fisher exact test | 0.43 | Fisher exact test | 0     | Fisher exact test | 0 |
|      |    |    |      | adj p value=0.59  |      | adj p value=1     |      | adj p value=0.28  |       | adj p value=0.99  |   |
| 8065 | G  | A  | COX2 | Fisher exact test | 0.21 | Fisher exact test | 0.37 | Fisher exact test | 0     | Fisher exact test | 0 |
|      |    |    |      | adj p value=0.58  |      | adj p value=1     |      | adj p value=0.19  |       | adj p value=0.99  |   |
| 8140 | C  | T  | COX2 | Fisher exact test | 0.21 | Fisher exact test | 0.51 | Fisher exact test | 0     | Fisher exact test | 0 |
|      |    |    |      | adj p value=0.74  |      | adj p value=1     |      | adj p value=0.46  |       | adj p value=0.99  |   |

|      |   |   |      |                    |      |                   |      |                     |      |                     |      |
|------|---|---|------|--------------------|------|-------------------|------|---------------------|------|---------------------|------|
| 8152 | G | A | COX2 | Chi2 test          | 0.34 | Chi2 test         | 0.88 | Fisher exact test   | 0    | Fisher exact test   | 0    |
|      |   |   |      | adj p value=1      |      | adj p value=1     |      | adj p value=0.12    |      | adj p value=0.51    |      |
| 8167 | T | C | COX2 | Fisher exact test  | 0.16 | Fisher exact test | 0.37 | Fisher exact test   | 0    | Fisher exact test   | 0    |
|      |   |   |      | adj p value=0.45   |      | adj p value=1     |      | adj p value=0.19    |      | adj p value=0.99    |      |
| 8371 | C | A | ATP8 | Fisher exact test  | 0.18 | Fisher exact test | 0.43 | Fisher exact test   | 0    | Fisher exact test   | 0    |
|      |   |   |      | adj p value=0.59   |      | adj p value=1     |      | adj p value=0.28    |      | adj p value=0.99    |      |
| 8374 | A | G | ATP8 | Fisher exact test  | 0.25 | Fisher exact test | 0.6  | Fisher exact test   | 0    | Fisher exact test   | 0    |
|      |   |   |      | adj p value=0.74   |      | adj p value=1     |      | adj p value=0.28    |      | adj p value=0.99    |      |
| 8380 | T | C | ATP8 | Fisher exact test  | 0.18 | Fisher exact test | 0.43 | Fisher exact test   | 0    | Fisher exact test   | 0    |
|      |   |   |      | adj p value=0.59   |      | adj p value=1     |      | adj p value=0.28    |      | adj p value=0.99    |      |
| 8383 | T | C | ATP8 | Fisher exact test  | 0.18 | Fisher exact test | 0.43 | Fisher exact test   | 0    | Fisher exact test   | 0    |
|      |   |   |      | adj p value=0.59   |      | adj p value=1     |      | adj p value=0.28    |      | adj p value=0.99    |      |
| 8386 | C | T | ATP8 | Fisher exact test  | 0.18 | Fisher exact test | 0.43 | Fisher exact test   | 0    | Fisher exact test   | 0    |
|      |   |   |      | adj p value=0.59   |      | adj p value=1     |      | adj p value=0.28    |      | adj p value=0.99    |      |
| 8401 | A | C | ATP8 | Fisher exact test  | 0.12 | Fisher exact test | 0.28 | Fisher exact test   | 0    | Fisher exact test   | 0    |
|      |   |   |      | adj p value=0.33   |      | adj p value=1     |      | adj p value=0.28    |      | adj p value=0.99    |      |
| 8405 | A | G | ATP8 | Fisher exact test  | 0.09 | Fisher exact test | 0.46 | Fisher exact test   | 0.02 | Fisher exact test   | 0.03 |
|      |   |   |      | adj p value=0.0048 |      | adj p value=1     |      | adj p value=1.4e-07 |      | adj p value=0.00018 |      |

|      |   |   |      |                    |      |                   |      |                     |      |                   |      |
|------|---|---|------|--------------------|------|-------------------|------|---------------------|------|-------------------|------|
| 8410 | C | A | ATP8 | Fisher exact test  | 0.14 | Fisher exact test | 0.33 | Fisher exact test   | 0    | Fisher exact test | 0    |
|      |   |   |      | adj p value=0.54   |      | adj p value=1     |      | adj p value=0.46    |      | adj p value=0.99  |      |
| 8416 | C | T | ATP8 | Fisher exact test  | 0.09 | Fisher exact test | 0.38 | Fisher exact test   | 0.02 | Fisher exact test | 0.05 |
|      |   |   |      | adj p value=0.0048 |      | adj p value=1     |      | adj p value=4.8e-07 |      | adj p value=0.002 |      |
| 8419 | T | C | ATP8 | Fisher exact test  | 0.12 | Fisher exact test | 0.28 | Fisher exact test   | 0    | Fisher exact test | 0    |
|      |   |   |      | adj p value=0.33   |      | adj p value=1     |      | adj p value=0.28    |      | adj p value=0.99  |      |
| 8428 | C | T | ATP8 | Fisher exact test  | 0.18 | Fisher exact test | 0.28 | Fisher exact test   | 0.12 | Fisher exact test | 0.44 |
|      |   |   |      | adj p value=0.59   |      | adj p value=1     |      | adj p value=0.75    |      | adj p value=1     |      |
| 8437 | C | T | ATP8 | Fisher exact test  | 0.13 | Fisher exact test | 0.59 | Fisher exact test   | 0.03 | Chi2 test         | 0.06 |
|      |   |   |      | adj p value=0.025  |      | adj p value=1     |      | adj p value=5.6e-06 |      | adj p             |      |
|      |   |   |      |                    |      |                   |      |                     |      | value=0.0039      |      |
| 8440 | A | G | ATP8 | Chi2 test          | 0.18 | Chi2 test         | 0.72 | Chi2 test           | 0.05 | Chi2 test         | 0.07 |
|      |   |   |      | adj p value=0.12   |      | adj p value=1     |      | adj p               |      | adj p value=0.011 |      |
|      |   |   |      |                    |      |                   |      | value=0.00017       |      |                   |      |
| 8455 | C | T | ATP8 | Fisher exact test  | 0.16 | Fisher exact test | 0.46 | Fisher exact test   | 0.08 | Chi2 test         | 0.18 |
|      |   |   |      | adj p value=0.14   |      | adj p value=1     |      | adj p value=0.0069  |      | adj p value=0.54  |      |
| 8461 | C | T | ATP8 | Fisher exact test  | 0.19 | Fisher exact test | 0.48 | Fisher exact test   | 0.11 | Chi2 test         | 0.22 |
|      |   |   |      | adj p value=0.16   |      | adj p value=1     |      | adj p value=0.021   |      | adj p value=0.75  |      |
| 8467 | C | T | ATP8 | Chi2 test          | 0.24 | Chi2 test         | 0.45 | Chi2 test           | 0.17 | Chi2 test         | 0.38 |

|      |    |    |         |                   |      |                   |      |                   |      |                   |      |
|------|----|----|---------|-------------------|------|-------------------|------|-------------------|------|-------------------|------|
|      |    |    |         | adj p value=0.29  |      | adj p value=1     |      | adj p value=0.12  |      | adj p value=1     |      |
| 8473 | T  | C  | ATP8    | Chi2 test         | 0.41 | Chi2 test         | 0.58 | Chi2 test         | 0.37 | Chi2 test         | 0.64 |
|      |    |    |         | adj p value=1     |      | adj p value=1     |      | adj p value=1     |      | adj p value=1     |      |
| 8503 | T  | C  | ATP8    | Chi2 test         | 0.88 | Chi2 test         | 0.98 | Chi2 test         | 0.91 | Chi2 test         | 0.93 |
|      |    |    |         | adj p value=1     |      | adj p value=1     |      | adj p value=1     |      | adj p value=1     |      |
| 8508 | AC | GT | ATP8    | Chi2 test         | 0.91 | Chi2 test         | 0.92 | Chi2 test         | 0.99 | Chi2 test         | 1.08 |
|      |    |    |         | adj p value=1     |      | adj p value=1     |      | adj p value=1     |      | adj p value=1     |      |
| 8527 | A  | G  | ATP8,AT | Chi2 test         | 1.07 | Chi2 test         | 1.33 | Chi2 test         | 0.97 | Chi2 test         | 0.73 |
|      |    |    | P6      | adj p value=1     |      |
| 8558 | C  | G  | ATP8,AT | Fisher exact test | 0    | Fisher exact test | 0    | Fisher exact test | 0    | Fisher exact test |      |
|      |    |    | P6      | adj p value=0.062 |      | adj p value=1     |      | adj p value=0.28  |      | adj p value=1     |      |
| 8566 | A  | G  | ATP8,AT | Chi2 test         | 0.26 | Chi2 test         | 0.56 | Fisher exact test | 0.07 | Fisher exact test | 0.12 |
|      |    |    | P6      | adj p value=0.85  |      | adj p value=1     |      | adj p value=0.16  |      | adj p value=0.99  |      |
| 8568 | C  | T  | ATP8,AT | Fisher exact test | 0.12 | Fisher exact test | 0.28 | Fisher exact test | 0    | Fisher exact test | 0    |
|      |    |    | P6      | adj p value=0.33  |      | adj p value=1     |      | adj p value=0.28  |      | adj p value=0.99  |      |
| 8574 | C  | T  | ATP6    | Chi2 test         | 0.57 | Chi2 test         | 1.44 | Fisher exact test | 0.2  | Fisher exact test | 0.14 |
|      |    |    |         | adj p value=1     |      | adj p value=1     |      | adj p value=0.35  |      | adj p value=0.39  |      |
| 8577 | A  | G  | ATP6    | Chi2 test         | 0.57 | Chi2 test         | 1.44 | Fisher exact test | 0.2  | Fisher exact test | 0.14 |
|      |    |    |         | adj p value=1     |      | adj p value=1     |      | adj p value=0.35  |      | adj p value=0.39  |      |



|      |   |   |      |                   |      |                   |      |                    |      |                     |      |
|------|---|---|------|-------------------|------|-------------------|------|--------------------|------|---------------------|------|
| 8611 | C | T | ATP6 | Fisher exact test | 0.18 | Fisher exact test | 0.28 | Fisher exact test  | 0.12 | Fisher exact test   | 0.44 |
|      |   |   |      | adj p value=0.59  |      | adj p value=1     |      | adj p value=0.75   |      | adj p value=1       |      |
| 8618 | T | C | ATP6 | Fisher exact test |      | Fisher exact test |      | Fisher exact test  |      | Fisher exact test   | 6.44 |
|      |   |   |      | adj p value=0.73  |      | adj p value=1     |      | adj p value=0.31   |      | adj p value=0.99    |      |
| 8632 | T | C | ATP6 | Fisher exact test | 0.16 | Fisher exact test | 0.24 | Fisher exact test  | 0.1  | Fisher exact test   | 0.44 |
|      |   |   |      | adj p value=0.45  |      | adj p value=1     |      | adj p value=0.53   |      | adj p value=1       |      |
| 8634 | T | C | ATP6 | Chi2 test         | 0.42 | Chi2 test         | 1.72 | Fisher exact test  | 0.06 | Fisher exact test   | 0.04 |
|      |   |   |      | adj p value=1     |      | adj p value=1     |      | adj p value=0.0022 |      | adj p value=0.00043 |      |
| 8655 | C | T | ATP6 | Chi2 test         | 0.27 | Fisher exact test | 0.91 | Chi2 test          | 0.12 | Fisher exact test   | 0.13 |
|      |   |   |      | adj p value=0.75  |      | adj p value=1     |      | adj p value=0.03   |      | adj p value=0.23    |      |
| 8658 | C | T | ATP6 | Fisher exact test | 0.1  | Fisher exact test | 0.23 | Fisher exact test  | 0    | Fisher exact test   | 0    |
|      |   |   |      | adj p value=0.72  |      | adj p value=1     |      | adj p value=1      |      | adj p value=0.99    |      |
| 8677 | A | C | ATP6 | Chi2 test         | 0.46 | Chi2 test         | 1    | Chi2 test          | 0.22 | Chi2 test           | 0.22 |
|      |   |   |      | adj p value=1     |      | adj p value=1     |      | adj p value=0.29   |      | adj p value=0.69    |      |
| 8714 | C | T | ATP6 | Fisher exact test | 0.18 | Fisher exact test | 0    | Fisher exact test  | 0.38 | Fisher exact test   |      |
|      |   |   |      | adj p value=0.74  |      | adj p value=1     |      | adj p value=1      |      | adj p value=1       |      |
| 8721 | A | G | ATP6 | Chi2 test         | 0.55 | Chi2 test         | 0.92 | Chi2 test          | 0.23 | Chi2 test           | 0.25 |
|      |   |   |      | adj p value=1     |      | adj p value=1     |      | adj p value=0.49   |      | adj p value=1       |      |

|      |   |      |      |                   |      |                   |      |                    |      |                   |      |
|------|---|------|------|-------------------|------|-------------------|------|--------------------|------|-------------------|------|
| 8775 | C | T    | ATP6 | Chi2 test         | 0.23 | Chi2 test         | 0.44 | Fisher exact test  | 0.09 | Fisher exact test | 0.2  |
|      |   |      |      | adj p value=0.19  |      | adj p value=1     |      | adj p value=0.0038 |      | adj p value=0.92  |      |
| 8778 | C | T    | ATP6 | Chi2 test         | 0.25 | Chi2 test         | 0.42 | Fisher exact test  | 0.11 | Fisher exact test | 0.27 |
|      |   |      |      | adj p value=0.23  |      | adj p value=1     |      | adj p value=0.017  |      | adj p value=0.99  |      |
| 8784 | A | G    | ATP6 | Chi2 test         | 0.26 | Chi2 test         | 0.43 | Fisher exact test  | 0.1  | Fisher exact test | 0.23 |
|      |   |      |      | adj p value=0.28  |      | adj p value=1     |      | adj p value=0.0081 |      | adj p value=0.99  |      |
| 8789 | T | TAC- | ATP6 | Fisher exact test | 0.07 | Fisher exact test | 0.16 | Fisher exact test  | 0    | Fisher exact test | 0    |
|      |   | GCCG |      | adj p value=0.28  |      | adj p value=1     |      | adj p value=0.46   |      | adj p value=0.99  |      |
|      |   | AG-  |      |                   |      |                   |      |                    |      |                   |      |
|      |   | GCCG |      |                   |      |                   |      |                    |      |                   |      |
|      |   | CCGC |      |                   |      |                   |      |                    |      |                   |      |
|      |   | CGCC |      |                   |      |                   |      |                    |      |                   |      |
|      |   | GCCG |      |                   |      |                   |      |                    |      |                   |      |
|      |   | CC   |      |                   |      |                   |      |                    |      |                   |      |
| 8793 | T | G    | ATP6 | Fisher exact test | 0.1  | Fisher exact test | 0.23 | Fisher exact test  | 0    | Fisher exact test | 0    |
|      |   |      |      | adj p value=0.72  |      | adj p value=1     |      | adj p value=1      |      | adj p value=0.99  |      |
| 8795 | A | C    | ATP6 | Fisher exact test | 0    | Fisher exact test | 0    | Fisher exact test  | 0    | Fisher exact test |      |
|      |   |      |      | adj p value=0.59  |      | adj p value=1     |      | adj p value=1      |      | adj p value=1     |      |
| 8848 | T | C    | ATP6 | Chi2 test         | 0.31 | Fisher exact test | 0.35 | Fisher exact test  | 0.15 | Fisher exact test | 0.42 |

|      |   |   |      |                   |      |                   |      |                   |      |                   |      |
|------|---|---|------|-------------------|------|-------------------|------|-------------------|------|-------------------|------|
|      |   |   |      | adj p value=1     |      | adj p value=1     |      | adj p value=0.5   |      | adj p value=0.99  |      |
| 8850 | A | G | ATP6 | Chi2 test         | 0.26 | Fisher exact test | 0.35 | Fisher exact test | 0.07 | Fisher exact test | 0.2  |
|      |   |   |      | adj p value=0.85  |      | adj p value=1     |      | adj p value=0.16  |      | adj p value=0.99  |      |
| 8854 | G | A | ATP6 | Chi2 test         | 0.31 | Fisher exact test | 0.45 | Fisher exact test | 0.07 | Fisher exact test | 0.16 |
|      |   |   |      | adj p value=1     |      | adj p value=1     |      | adj p value=0.16  |      | adj p value=0.99  |      |
| 8856 | G | A | ATP6 | Chi2 test         | 0.21 | Fisher exact test | 0.27 | Fisher exact test | 0.06 | Fisher exact test | 0.2  |
|      |   |   |      | adj p value=0.34  |      | adj p value=1     |      | adj p value=0.093 |      | adj p value=0.99  |      |
| 8859 | C | T | ATP6 | Chi2 test         | 0.31 | Fisher exact test | 0.45 | Fisher exact test | 0.07 | Fisher exact test | 0.16 |
|      |   |   |      | adj p value=1     |      | adj p value=1     |      | adj p value=0.16  |      | adj p value=0.99  |      |
| 8860 | A | G | ATP6 | Fisher exact test |      |
|      |   |   |      | adj p value=1     |      |
| 8865 | G | A | ATP6 | Chi2 test         | 0.24 | Fisher exact test | 0.36 | Fisher exact test | 0.06 | Fisher exact test | 0.16 |
|      |   |   |      | adj p value=0.53  |      | adj p value=1     |      | adj p value=0.093 |      | adj p value=0.99  |      |
| 8870 | T | C | ATP6 | Chi2 test         | 0.24 | Fisher exact test | 0.36 | Fisher exact test | 0.06 | Fisher exact test | 0.16 |
|      |   |   |      | adj p value=0.53  |      | adj p value=1     |      | adj p value=0.093 |      | adj p value=0.99  |      |
| 8875 | T | C | ATP6 | Chi2 test         | 0.35 | Fisher exact test | 0.51 | Fisher exact test | 0.08 | Fisher exact test | 0.16 |
|      |   |   |      | adj p value=1     |      | adj p value=1     |      | adj p value=0.24  |      | adj p value=0.99  |      |
| 8877 | T | C | ATP6 | Fisher exact test | 0    | Fisher exact test | 0    | Fisher exact test | 0    | Fisher exact test |      |
|      |   |   |      | adj p value=0.74  |      | adj p value=1     |      | adj p value=1     |      | adj p value=1     |      |

|      |    |    |      |                   |      |                   |      |                   |      |                   |      |
|------|----|----|------|-------------------|------|-------------------|------|-------------------|------|-------------------|------|
| 8886 | G  | A  | ATP6 | Chi2 test         | 0.34 | Fisher exact test | 0.58 | Fisher exact test | 0    | Fisher exact test | 0    |
|      |    |    |      | adj p value=1     |      | adj p value=1     |      | adj p value=0.12  |      | adj p value=0.99  |      |
| 8888 | TT | CC | ATP6 | Chi2 test         | 0.34 | Fisher exact test | 0.58 | Fisher exact test | 0    | Fisher exact test | 0    |
|      |    |    |      | adj p value=1     |      | adj p value=1     |      | adj p value=0.12  |      | adj p value=0.99  |      |
| 9261 | A  | C  | COX3 | Fisher exact test | 0    | Fisher exact test | 0    | Fisher exact test | 0    | Fisher exact test |      |
|      |    |    |      | adj p value=0.74  |      | adj p value=1     |      | adj p value=1     |      | adj p value=1     |      |
| 9325 | T  | C  | COX3 | Chi2 test         | 0.39 | Chi2 test         | 1.03 | Fisher exact test | 0.06 | Fisher exact test | 0.05 |
|      |    |    |      | adj p value=1     |      | adj p value=1     |      | adj p value=0.093 |      | adj p value=0.25  |      |
| 9329 | G  | C  | COX3 | Chi2 test         | 0.44 | Chi2 test         | 1.12 | Fisher exact test | 0.07 | Fisher exact test | 0.06 |
|      |    |    |      | adj p value=1     |      | adj p value=1     |      | adj p value=0.16  |      | adj p value=0.39  |      |
| 9527 | C  | T  | COX3 | Fisher exact test | 0.23 | Fisher exact test | 0.45 | Fisher exact test | 0.09 | Fisher exact test | 0.2  |
|      |    |    |      | adj p value=0.62  |      | adj p value=1     |      | adj p value=0.35  |      | adj p value=0.99  |      |
| 9530 | T  | C  | COX3 | Chi2 test         | 0.39 | Chi2 test         | 0.93 | Fisher exact test | 0.08 | Fisher exact test | 0.09 |
|      |    |    |      | adj p value=1     |      | adj p value=1     |      | adj p value=0.24  |      | adj p value=0.79  |      |
| 9692 | AC | GT | COX3 | Fisher exact test | 0.1  | Fisher exact test | 0    | Fisher exact test | 0.21 | Fisher exact test |      |
|      |    |    |      | adj p value=0.72  |      | adj p value=1     |      | adj p value=1     |      | adj p value=1     |      |
| 9695 | G  | A  | COX3 | Fisher exact test | 0.1  | Fisher exact test | 0.23 | Fisher exact test | 0    | Fisher exact test | 0    |
|      |    |    |      | adj p value=0.72  |      | adj p value=1     |      | adj p value=1     |      | adj p value=0.99  |      |
| 9713 | G  | A  | COX3 | Fisher exact test | 0    | Fisher exact test | 0    | Fisher exact test | 0    | Fisher exact test |      |

|      |   |   |      |                   |      |                   |      |                   |   |                   |   |
|------|---|---|------|-------------------|------|-------------------|------|-------------------|---|-------------------|---|
|      |   |   |      | adj p value=0.74  |      | adj p value=1     |      | adj p value=1     |   | adj p value=1     |   |
| 9717 | C | G | COX3 | Fisher exact test | 0    | Fisher exact test | 0    | Fisher exact test | 0 | Fisher exact test |   |
|      |   |   |      | adj p value=0.74  |      | adj p value=1     |      | adj p value=1     |   | adj p value=1     |   |
| 9719 | C | T | COX3 | Fisher exact test | 0    | Fisher exact test | 0    | Fisher exact test | 0 | Fisher exact test |   |
|      |   |   |      | adj p value=0.74  |      | adj p value=1     |      | adj p value=1     |   | adj p value=1     |   |
| 9722 | T | C | COX3 | Fisher exact test | 0    | Fisher exact test | 0    | Fisher exact test | 0 | Fisher exact test |   |
|      |   |   |      | adj p value=0.74  |      | adj p value=1     |      | adj p value=1     |   | adj p value=1     |   |
| 9785 | C | T | COX3 | Fisher exact test | 0    | Fisher exact test | 0    | Fisher exact test | 0 | Fisher exact test |   |
|      |   |   |      | adj p value=0.59  |      | adj p value=1     |      | adj p value=1     |   | adj p value=1     |   |
| 9839 | C | A | COX3 | Fisher exact test | 0.08 | Fisher exact test | 0.19 | Fisher exact test | 0 | Fisher exact test | 0 |
|      |   |   |      | adj p value=0.49  |      | adj p value=1     |      | adj p value=0.71  |   | adj p value=0.99  |   |
| 9857 | C | T | COX3 | Fisher exact test | 0    | Fisher exact test | 0    | Fisher exact test | 0 | Fisher exact test |   |
|      |   |   |      | adj p value=0.59  |      | adj p value=1     |      | adj p value=1     |   | adj p value=1     |   |
| 9861 | T | C | COX3 | Fisher exact test | 0    | Fisher exact test | 0    | Fisher exact test | 0 | Fisher exact test |   |
|      |   |   |      | adj p value=0.062 |      | adj p value=1     |      | adj p value=0.28  |   | adj p value=1     |   |
| 9877 | T | A | COX3 | Fisher exact test | 0    | Fisher exact test | 0    | Fisher exact test | 0 | Fisher exact test |   |
|      |   |   |      | adj p value=0.74  |      | adj p value=1     |      | adj p value=1     |   | adj p value=1     |   |
| 9880 | T | A | COX3 | Fisher exact test | 0    | Fisher exact test | 0    | Fisher exact test | 0 | Fisher exact test |   |
|      |   |   |      | adj p value=0.74  |      | adj p value=1     |      | adj p value=1     |   | adj p value=1     |   |

|       |    |    |      |                   |      |                   |      |                   |      |                   |      |
|-------|----|----|------|-------------------|------|-------------------|------|-------------------|------|-------------------|------|
| 9893  | C  | T  | COX3 | Fisher exact test | 0.1  | Fisher exact test | 0.23 | Fisher exact test | 0    | Fisher exact test | 0    |
|       |    |    |      | adj p value=0.72  |      | adj p value=1     |      | adj p value=1     |      | adj p value=0.99  |      |
| 9896  | A  | C  | COX3 | Fisher exact test | 0    | Fisher exact test | 0    | Fisher exact test | 0    | Fisher exact test |      |
|       |    |    |      | adj p value=0.59  |      | adj p value=1     |      | adj p value=1     |      | adj p value=1     |      |
| 9911  | CG | TA | COX3 | Fisher exact test | 0    | Fisher exact test | 0    | Fisher exact test | 0    | Fisher exact test |      |
|       |    |    |      | adj p value=0.59  |      | adj p value=1     |      | adj p value=1     |      | adj p value=1     |      |
| 9924  | T  | G  | COX3 | Fisher exact test | 0    | Fisher exact test | 0    | Fisher exact test | 0    | Fisher exact test |      |
|       |    |    |      | adj p value=0.74  |      | adj p value=1     |      | adj p value=1     |      | adj p value=1     |      |
| 9929  | C  | T  | COX3 | Fisher exact test | 0    | Fisher exact test | 0    | Fisher exact test | 0    | Fisher exact test |      |
|       |    |    |      | adj p value=0.74  |      | adj p value=1     |      | adj p value=1     |      | adj p value=1     |      |
| 10308 | C  | T  | ND3  | Fisher exact test | 0    | Fisher exact test | 0    | Fisher exact test | 0    | Fisher exact test |      |
|       |    |    |      | adj p value=0.74  |      | adj p value=1     |      | adj p value=1     |      | adj p value=1     |      |
| 10310 | G  | A  | ND3  | Fisher exact test | 0    | Fisher exact test | 0    | Fisher exact test | 0    | Fisher exact test |      |
|       |    |    |      | adj p value=0.74  |      | adj p value=1     |      | adj p value=1     |      | adj p value=1     |      |
| 10377 | C  | T  | ND3  | Chi2 test         | 0.39 | Fisher exact test | 0.25 | Chi2 test         | 0.6  | Fisher exact test | 2.44 |
|       |    |    |      | adj p value=1     |      | adj p value=1     |      | adj p value=1     |      | adj p value=0.99  |      |
| 10380 | C  | T  | ND3  | Chi2 test         | 0.31 | Fisher exact test | 0.22 | Chi2 test         | 0.46 | Fisher exact test | 2.08 |
|       |    |    |      | adj p value=0.85  |      | adj p value=1     |      | adj p value=1     |      | adj p value=0.99  |      |
| 10388 | A  | G  | ND3  | Chi2 test         | 0.31 | Fisher exact test | 0.22 | Chi2 test         | 0.46 | Fisher exact test | 2.08 |

|       |    |    |      |                   |      |                   |      |                   |      |                   |      |
|-------|----|----|------|-------------------|------|-------------------|------|-------------------|------|-------------------|------|
|       |    |    |      | adj p value=0.85  |      | adj p value=1     |      | adj p value=1     |      | adj p value=0.99  |      |
| 10417 | T  | C  | TRNR | Fisher exact test | 0.21 | Fisher exact test | 0.37 | Fisher exact test | 0.1  | Fisher exact test | 0.28 |
|       |    |    |      | adj p value=0.58  |      | adj p value=1     |      | adj p value=0.53  |      | adj p value=0.99  |      |
| 10589 | G  | A  | ND4L | Fisher exact test | 0.18 | Fisher exact test | 0.1  | Fisher exact test | 0.09 | Fisher exact test | 0.91 |
|       |    |    |      | adj p value=0.39  |      | adj p value=1     |      | adj p value=0.35  |      | adj p value=1     |      |
| 10646 | G  | A  | ND4L | Chi2 test         | 0.26 | Fisher exact test | 0.35 | Fisher exact test | 0.07 | Fisher exact test | 0.2  |
|       |    |    |      | adj p value=0.85  |      | adj p value=1     |      | adj p value=0.16  |      | adj p value=0.99  |      |
| 10652 | TG | CA | ND4L | Fisher exact test | 0.31 | Fisher exact test | 0.6  | Fisher exact test | 0    | Fisher exact test | 0    |
|       |    |    |      | adj p value=0.74  |      | adj p value=1     |      | adj p value=0.28  |      | adj p value=0.99  |      |
| 10667 | T  | C  | ND4L | Fisher exact test | 0    | Fisher exact test | 0    | Fisher exact test | 0    | Fisher exact test |      |
|       |    |    |      | adj p value=0.74  |      | adj p value=1     |      | adj p value=1     |      | adj p value=1     |      |
| 10670 | C  | T  | ND4L | Chi2 test         | 0.31 | Chi2 test         | 0.45 | Fisher exact test | 0.12 | Fisher exact test | 0.26 |
|       |    |    |      | adj p value=0.93  |      | adj p value=1     |      | adj p value=0.22  |      | adj p value=0.99  |      |
| 10677 | G  | A  | ND4L | Chi2 test         | 0.27 | Fisher exact test | 0.4  | Fisher exact test | 0.13 | Fisher exact test | 0.32 |
|       |    |    |      | adj p value=0.84  |      | adj p value=1     |      | adj p value=0.32  |      | adj p value=0.99  |      |
| 10679 | A  | G  | ND4L | Chi2 test         | 0.25 | Chi2 test         | 0.4  | Fisher exact test | 0.1  | Fisher exact test | 0.26 |
|       |    |    |      | adj p value=0.5   |      | adj p value=1     |      | adj p value=0.15  |      | adj p value=0.99  |      |
| 10685 | G  | A  | ND4L | Chi2 test         | 0.28 | Chi2 test         | 0.49 | Fisher exact test | 0.1  | Fisher exact test | 0.21 |
|       |    |    |      | adj p value=0.65  |      | adj p value=1     |      | adj p value=0.15  |      | adj p value=0.99  |      |

|       |   |   |      |                   |      |                   |      |                   |      |                   |      |
|-------|---|---|------|-------------------|------|-------------------|------|-------------------|------|-------------------|------|
| 10750 | A | G | ND4L | Fisher exact test | 0.14 | Fisher exact test | 0.33 | Fisher exact test | 0    | Fisher exact test | 0    |
|       |   |   |      | adj p value=0.54  |      | adj p value=1     |      | adj p value=0.46  |      | adj p value=0.99  |      |
| 10775 | G | A | ND4  | Fisher exact test | 0.1  | Fisher exact test | 0.23 | Fisher exact test | 0    | Fisher exact test | 0    |
|       |   |   |      | adj p value=0.72  |      | adj p value=1     |      | adj p value=1     |      | adj p value=0.99  |      |
| 10786 | T | C | ND4  | Fisher exact test | 0.09 | Fisher exact test | 0.21 | Fisher exact test | 0    | Fisher exact test | 0    |
|       |   |   |      | adj p value=0.12  |      | adj p value=1     |      | adj p value=0.12  |      | adj p value=0.99  |      |
| 10801 | G | A | ND4  | Fisher exact test | 0.09 | Fisher exact test | 0.21 | Fisher exact test | 0    | Fisher exact test | 0    |
|       |   |   |      | adj p value=0.12  |      | adj p value=1     |      | adj p value=0.12  |      | adj p value=0.99  |      |
| 10808 | C | T | ND4  | Fisher exact test | 0.14 | Fisher exact test | 0.32 | Fisher exact test | 0    | Fisher exact test | 0    |
|       |   |   |      | adj p value=0.28  |      | adj p value=1     |      | adj p value=0.12  |      | adj p value=0.99  |      |
| 10810 | T | C | ND4  | Chi2 test         | 0.32 | Chi2 test         | 0.24 | Chi2 test         | 0.41 | Chi2 test         | 1.74 |
|       |   |   |      | adj p value=0.69  |      | adj p value=1     |      | adj p value=1     |      | adj p value=1     |      |
| 10816 | A | G | ND4  | Fisher exact test | 0    | Fisher exact test | 0    | Fisher exact test | 0    | Fisher exact test |      |
|       |   |   |      | adj p value=0.59  |      | adj p value=1     |      | adj p value=1     |      | adj p value=1     |      |
| 10846 | C | T | ND4  | Fisher exact test | 0.21 | Fisher exact test | 0.24 | Fisher exact test | 0.1  | Fisher exact test | 0.44 |
|       |   |   |      | adj p value=0.58  |      | adj p value=1     |      | adj p value=0.53  |      | adj p value=1     |      |
| 10866 | T | C | ND4  | Fisher exact test | 0.27 | Fisher exact test | 0.37 | Fisher exact test | 0.1  | Fisher exact test | 0.28 |
|       |   |   |      | adj p value=0.74  |      | adj p value=1     |      | adj p value=0.53  |      | adj p value=0.99  |      |
| 10972 | A | C | ND4  | Fisher exact test | 0.07 | Fisher exact test | 0.16 | Fisher exact test | 0    | Fisher exact test | 0    |



|       |    |    |     |                   |      |                   |      |                   |     |                   |      |
|-------|----|----|-----|-------------------|------|-------------------|------|-------------------|-----|-------------------|------|
|       |    |    |     | adj p value=0.28  |      | adj p value=1     |      | adj p value=0.46  |     | adj p value=0.99  |      |
| 10978 | A  | C  | ND4 | Fisher exact test |      | Fisher exact test |      | Fisher exact test |     | Fisher exact test | 0    |
|       |    |    |     | adj p value=0.74  |      | adj p value=1     |      | adj p value=1     |     | adj p value=0.99  |      |
| 11107 | C  | T  | ND4 | Fisher exact test | 0    | Fisher exact test | 0    | Fisher exact test | 0   | Fisher exact test |      |
|       |    |    |     | adj p value=0.59  |      | adj p value=1     |      | adj p value=1     |     | adj p value=1     |      |
| 11113 | T  | C  | ND4 | Fisher exact test | 0    | Fisher exact test | 0    | Fisher exact test | 0   | Fisher exact test |      |
|       |    |    |     | adj p value=0.74  |      | adj p value=1     |      | adj p value=1     |     | adj p value=1     |      |
| 11116 | T  | C  | ND4 | Fisher exact test | 0    | Fisher exact test | 0    | Fisher exact test | 0   | Fisher exact test |      |
|       |    |    |     | adj p value=0.74  |      | adj p value=1     |      | adj p value=1     |     | adj p value=1     |      |
| 11129 | A  | G  | ND4 | Fisher exact test | 0.16 | Fisher exact test | 0.24 | Fisher exact test | 0   | Fisher exact test | 0    |
|       |    |    |     | adj p value=0.45  |      | adj p value=1     |      | adj p value=0.19  |     | adj p value=0.99  |      |
| 11134 | A  | G  | ND4 | Fisher exact test | 0.17 | Fisher exact test | 0.39 | Fisher exact test | 0   | Fisher exact test | 0    |
|       |    |    |     | adj p value=0.74  |      | adj p value=1     |      | adj p value=0.71  |     | adj p value=0.99  |      |
| 11137 | TA | AG | ND4 | Fisher exact test | 0.17 | Fisher exact test | 0.39 | Fisher exact test | 0   | Fisher exact test | 0    |
|       |    |    |     | adj p value=0.74  |      | adj p value=1     |      | adj p value=0.71  |     | adj p value=0.99  |      |
| 11710 | C  | T  | ND4 | Fisher exact test | 0.21 | Fisher exact test | 0.37 | Fisher exact test | 0.1 | Fisher exact test | 0.28 |
|       |    |    |     | adj p value=0.58  |      | adj p value=1     |      | adj p value=0.53  |     | adj p value=0.99  |      |
| 11719 | G  | A  | ND4 | Fisher exact test | 0    | Fisher exact test | 0    | Fisher exact test | 0   | Fisher exact test | 3.56 |
|       |    |    |     | adj p value=0.74  |      | adj p value=1     |      | adj p value=1     |     | adj p value=0.99  |      |

|       |   |   |     |                   |      |                   |      |                   |      |                   |      |
|-------|---|---|-----|-------------------|------|-------------------|------|-------------------|------|-------------------|------|
| 11731 | A | C | ND4 | Chi2 test         | 0.29 | Fisher exact test | 0.58 | Fisher exact test | 0.09 | Fisher exact test | 0.16 |
|       |   |   |     | adj p value=1     |      | adj p value=1     |      | adj p value=0.35  |      | adj p value=0.99  |      |
| 11767 | C | T | ND4 | Chi2 test         | 0.29 | Fisher exact test | 0.45 | Fisher exact test | 0    | Fisher exact test | 0    |
|       |   |   |     | adj p value=1     |      | adj p value=1     |      | adj p value=0.12  |      | adj p value=0.99  |      |
| 11770 | T | C | ND4 | Chi2 test         | 0.17 | Fisher exact test | 0.22 | Fisher exact test | 0.04 | Fisher exact test | 0.2  |
|       |   |   |     | adj p value=0.14  |      | adj p value=1     |      | adj p value=0.025 |      | adj p value=0.99  |      |
| 11788 | C | T | ND4 | Chi2 test         | 0.19 | Fisher exact test | 0.25 | Fisher exact test | 0.05 | Fisher exact test | 0.2  |
|       |   |   |     | adj p value=0.23  |      | adj p value=1     |      | adj p value=0.053 |      | adj p value=0.99  |      |
| 11887 | G | A | ND4 | Fisher exact test | 0.08 | Fisher exact test | 0.19 | Fisher exact test | 0    | Fisher exact test | 0    |
|       |   |   |     | adj p value=0.49  |      | adj p value=1     |      | adj p value=0.71  |      | adj p value=0.99  |      |
| 11953 | C | T | ND4 | Fisher exact test | 0    | Fisher exact test | 0    | Fisher exact test | 0    | Fisher exact test |      |
|       |   |   |     | adj p value=0.74  |      | adj p value=1     |      | adj p value=1     |      | adj p value=1     |      |
| 11963 | G | A | ND4 | Fisher exact test | 0.17 | Fisher exact test | 0.39 | Fisher exact test | 0    | Fisher exact test | 0    |
|       |   |   |     | adj p value=0.74  |      | adj p value=1     |      | adj p value=0.71  |      | adj p value=0.99  |      |
| 12064 | C | T | ND4 | Fisher exact test | 0.07 | Fisher exact test | 0.16 | Fisher exact test | 0    | Fisher exact test | 0    |
|       |   |   |     | adj p value=0.28  |      | adj p value=1     |      | adj p value=0.46  |      | adj p value=0.99  |      |
| 12088 | C | T | ND4 | Fisher exact test | 0    | Fisher exact test | 0    | Fisher exact test | 0    | Fisher exact test |      |
|       |   |   |     | adj p value=0.19  |      | adj p value=1     |      | adj p value=0.71  |      | adj p value=1     |      |
| 12091 | T | C | ND4 | Fisher exact test | 0.06 | Fisher exact test | 0.13 | Fisher exact test | 0    | Fisher exact test | 0    |

|       |   |   |       |                   |      |                   |      |                   |      |                   |      |
|-------|---|---|-------|-------------------|------|-------------------|------|-------------------|------|-------------------|------|
|       |   |   |       | adj p value=0.16  |      | adj p value=1     |      | adj p value=0.28  |      | adj p value=0.99  |      |
| 12115 | C | T | ND4   | Fisher exact test | 0.1  | Fisher exact test | 0.24 | Fisher exact test | 0    | Fisher exact test | 0    |
|       |   |   |       | adj p value=0.19  |      | adj p value=1     |      | adj p value=0.19  |      | adj p value=0.99  |      |
| 12136 | T | C | ND4   | Fisher exact test | 0.14 | Fisher exact test | 0.33 | Fisher exact test | 0    | Fisher exact test | 0    |
|       |   |   |       | adj p value=0.54  |      | adj p value=1     |      | adj p value=0.46  |      | adj p value=0.99  |      |
| 12218 | C | T | TRNS2 | Chi2 test         | 0.44 | Chi2 test         | 1    | Fisher exact test | 0.06 | Fisher exact test | 0.06 |
|       |   |   |       | adj p value=1     |      | adj p value=1     |      | adj p value=0.16  |      | adj p value=0.39  |      |
| 12341 | C | A | ND5   | Fisher exact test | 0    | Fisher exact test | 0    | Fisher exact test | 0    | Fisher exact test |      |
|       |   |   |       | adj p value=0.74  |      | adj p value=1     |      | adj p value=1     |      | adj p value=1     |      |
| 12346 | C | T | ND5   | Fisher exact test | 0.27 | Fisher exact test | 0.37 | Fisher exact test | 0.22 | Fisher exact test | 0.58 |
|       |   |   |       | adj p value=0.74  |      | adj p value=1     |      | adj p value=1     |      | adj p value=1     |      |
| 12360 | C | A | ND5   | Fisher exact test | 0    | Fisher exact test | 0    | Fisher exact test | 0    | Fisher exact test |      |
|       |   |   |       | adj p value=0.74  |      | adj p value=1     |      | adj p value=1     |      | adj p value=1     |      |
| 12368 | C | T | ND5   | Fisher exact test | 0    | Fisher exact test | 0    | Fisher exact test | 0    | Fisher exact test |      |
|       |   |   |       | adj p value=0.74  |      | adj p value=1     |      | adj p value=1     |      | adj p value=1     |      |
| 12390 | C | T | ND5   | Fisher exact test | 0    | Fisher exact test | 0    | Fisher exact test | 0    | Fisher exact test |      |
|       |   |   |       | adj p value=0.59  |      | adj p value=1     |      | adj p value=1     |      | adj p value=1     |      |
| 12403 | C | T | ND5   | Fisher exact test | 0.18 | Fisher exact test | 0    | Fisher exact test | 0.38 | Fisher exact test |      |
|       |   |   |       | adj p value=0.74  |      | adj p value=1     |      | adj p value=1     |      | adj p value=1     |      |

|       |   |   |     |                   |      |                   |      |                   |      |                   |      |
|-------|---|---|-----|-------------------|------|-------------------|------|-------------------|------|-------------------|------|
| 12684 | G | A | ND5 | Chi2 test         | 0.25 | Fisher exact test | 0.51 | Fisher exact test | 0.08 | Fisher exact test | 0.16 |
|       |   |   |     | adj p value=0.85  |      | adj p value=1     |      | adj p value=0.24  |      | adj p value=0.99  |      |
| 12687 | C | T | ND5 | Fisher exact test | 0.1  | Fisher exact test | 0.24 | Fisher exact test | 0    | Fisher exact test | 0    |
|       |   |   |     | adj p value=0.19  |      | adj p value=1     |      | adj p value=0.19  |      | adj p value=0.99  |      |
| 12702 | C | T | ND5 | Fisher exact test | 0.14 | Fisher exact test | 0.33 | Fisher exact test | 0    | Fisher exact test | 0    |
|       |   |   |     | adj p value=0.54  |      | adj p value=1     |      | adj p value=0.46  |      | adj p value=0.99  |      |
| 12714 | T | C | ND5 | Fisher exact test | 0.25 | Fisher exact test | 0.43 | Fisher exact test | 0.12 | Fisher exact test | 0.28 |
|       |   |   |     | adj p value=0.74  |      | adj p value=1     |      | adj p value=0.75  |      | adj p value=0.99  |      |
| 12750 | C | T | ND5 | Fisher exact test | 0    | Fisher exact test | 0    | Fisher exact test | 0    | Fisher exact test |      |
|       |   |   |     | adj p value=0.74  |      | adj p value=1     |      | adj p value=1     |      | adj p value=1     |      |
| 12786 | A | G | ND5 | Fisher exact test | 0    | Fisher exact test | 0    | Fisher exact test | 0    | Fisher exact test |      |
|       |   |   |     | adj p value=0.59  |      | adj p value=1     |      | adj p value=1     |      | adj p value=1     |      |
| 12789 | C | T | ND5 | Fisher exact test | 0    | Fisher exact test | 0    | Fisher exact test | 0    | Fisher exact test |      |
|       |   |   |     | adj p value=0.59  |      | adj p value=1     |      | adj p value=1     |      | adj p value=1     |      |
| 12793 | T | C | ND5 | Fisher exact test | 0    | Fisher exact test | 0    | Fisher exact test | 0    | Fisher exact test |      |
|       |   |   |     | adj p value=0.74  |      | adj p value=1     |      | adj p value=1     |      | adj p value=1     |      |
| 12802 | A | G | ND5 | Fisher exact test | 0    | Fisher exact test | 0    | Fisher exact test | 0    | Fisher exact test |      |
|       |   |   |     | adj p value=0.74  |      | adj p value=1     |      | adj p value=1     |      | adj p value=1     |      |
| 12825 | T | C | ND5 | Fisher exact test | 0    | Fisher exact test | 0    | Fisher exact test | 0    | Fisher exact test |      |

|       |   |   |     |                   |      |                   |      |                   |      |                   |      |
|-------|---|---|-----|-------------------|------|-------------------|------|-------------------|------|-------------------|------|
|       |   |   |     | adj p value=0.74  |      | adj p value=1     |      | adj p value=1     |      | adj p value=1     |      |
| 12873 | T | C | ND5 | Fisher exact test | 0.21 | Fisher exact test | 0.51 | Fisher exact test | 0    | Fisher exact test | 0    |
|       |   |   |     | adj p value=0.74  |      | adj p value=1     |      | adj p value=0.46  |      | adj p value=0.99  |      |
| 12879 | T | C | ND5 | Fisher exact test | 0.06 | Fisher exact test | 0.13 | Fisher exact test | 0    | Fisher exact test | 0    |
|       |   |   |     | adj p value=0.16  |      | adj p value=1     |      | adj p value=0.28  |      | adj p value=0.99  |      |
| 12892 | T | C | ND5 | Fisher exact test | 0.21 | Fisher exact test | 0.51 | Fisher exact test | 0    | Fisher exact test | 0    |
|       |   |   |     | adj p value=0.74  |      | adj p value=1     |      | adj p value=0.46  |      | adj p value=0.99  |      |
| 13020 | T | C | ND5 | Fisher exact test | 0.18 | Fisher exact test | 0.28 | Fisher exact test | 0.12 | Fisher exact test | 0.44 |
|       |   |   |     | adj p value=0.59  |      | adj p value=1     |      | adj p value=0.75  |      | adj p value=1     |      |
| 13034 | T | C | ND5 | Fisher exact test | 0    | Fisher exact test | 0    | Fisher exact test | 0    | Fisher exact test |      |
|       |   |   |     | adj p value=0.74  |      | adj p value=1     |      | adj p value=1     |      | adj p value=1     |      |
| 13062 | A | G | ND5 | Fisher exact test | 0.25 | Fisher exact test | 0.43 | Fisher exact test | 0.12 | Fisher exact test | 0.28 |
|       |   |   |     | adj p value=0.74  |      | adj p value=1     |      | adj p value=0.75  |      | adj p value=0.99  |      |
| 13095 | T | C | ND5 | Fisher exact test | 0.18 | Fisher exact test | 0.43 | Fisher exact test | 0    | Fisher exact test | 0    |
|       |   |   |     | adj p value=0.59  |      | adj p value=1     |      | adj p value=0.28  |      | adj p value=0.99  |      |
| 13118 | T | A | ND5 | Fisher exact test | 0    | Fisher exact test | 0    | Fisher exact test | 0    | Fisher exact test |      |
|       |   |   |     | adj p value=0.74  |      | adj p value=1     |      | adj p value=1     |      | adj p value=1     |      |
| 13132 | C | T | ND5 | Fisher exact test | 0    | Fisher exact test | 0    | Fisher exact test | 0    | Fisher exact test |      |
|       |   |   |     | adj p value=0.74  |      | adj p value=1     |      | adj p value=1     |      | adj p value=1     |      |

|       |   |   |     |                   |      |                   |      |                   |      |                   |      |
|-------|---|---|-----|-------------------|------|-------------------|------|-------------------|------|-------------------|------|
| 13145 | G | A | ND5 | Chi2 test         | 0.58 | Chi2 test         | 1.67 | Fisher exact test | 0    | Fisher exact test | 0    |
|       |   |   |     | adj p value=1     |      | adj p value=1     |      | adj p value=0.19  |      | adj p value=0.13  |      |
| 13164 | A | C | ND5 | Fisher exact test | 1.72 | Fisher exact test | 5.07 | Fisher exact test | 0    | Fisher exact test | 0    |
|       |   |   |     | adj p value=1     |      | adj p value=1     |      | adj p value=1     |      | adj p value=0.058 |      |
| 13191 | T | C | ND5 | Fisher exact test | 0.21 | Fisher exact test | 0.51 | Fisher exact test | 0    | Fisher exact test | 0    |
|       |   |   |     | adj p value=0.74  |      | adj p value=1     |      | adj p value=0.46  |      | adj p value=0.99  |      |
| 13197 | C | T | ND5 | Fisher exact test | 0    | Fisher exact test | 0    | Fisher exact test | 0    | Fisher exact test |      |
|       |   |   |     | adj p value=0.74  |      | adj p value=1     |      | adj p value=1     |      | adj p value=1     |      |
| 13215 | T | C | ND5 | Fisher exact test | 0.17 | Fisher exact test | 0.39 | Fisher exact test | 0    | Fisher exact test | 0    |
|       |   |   |     | adj p value=0.74  |      | adj p value=1     |      | adj p value=0.71  |      | adj p value=0.99  |      |
| 13226 | A | C | ND5 | Fisher exact test | 0    | Fisher exact test | 0    | Fisher exact test | 0    | Fisher exact test |      |
|       |   |   |     | adj p value=0.74  |      | adj p value=1     |      | adj p value=1     |      | adj p value=1     |      |
| 13227 | C | T | ND5 | Fisher exact test | 0.12 | Fisher exact test | 0.28 | Fisher exact test | 0    | Fisher exact test | 0    |
|       |   |   |     | adj p value=0.33  |      | adj p value=1     |      | adj p value=0.28  |      | adj p value=0.99  |      |
| 13242 | A | G | ND5 | Chi2 test         | 0.48 | Chi2 test         | 1.16 | Fisher exact test | 0.13 | Fisher exact test | 0.11 |
|       |   |   |     | adj p value=1     |      | adj p value=1     |      | adj p value=0.32  |      | adj p value=0.51  |      |
| 13251 | C | T | ND5 | Chi2 test         | 0.25 | Fisher exact test | 0.39 | Fisher exact test | 0.08 | Fisher exact test | 0.2  |
|       |   |   |     | adj p value=0.85  |      | adj p value=1     |      | adj p value=0.24  |      | adj p value=0.99  |      |
| 13260 | T | C | ND5 | Chi2 test         | 0.33 | Chi2 test         | 0.8  | Fisher exact test | 0.07 | Fisher exact test | 0.08 |

|       |    |    |     |                   |      |                   |      |                    |      |                   |      |
|-------|----|----|-----|-------------------|------|-------------------|------|--------------------|------|-------------------|------|
|       |    |    |     | adj p value=0.84  |      | adj p value=1     |      | adj p value=0.013  |      | adj p value=0.25  |      |
| 13264 | C  | T  | ND5 | Chi2 test         | 0.22 | Fisher exact test | 0.35 | Fisher exact test  | 0.07 | Fisher exact test | 0.2  |
|       |    |    |     | adj p value=0.58  |      | adj p value=1     |      | adj p value=0.16   |      | adj p value=0.99  |      |
| 13272 | C  | T  | ND5 | Chi2 test         | 0.48 | Chi2 test         | 1.16 | Fisher exact test  | 0.13 | Fisher exact test | 0.11 |
|       |    |    |     | adj p value=1     |      | adj p value=1     |      | adj p value=0.32   |      | adj p value=0.51  |      |
| 13275 | AA | GG | ND5 | Fisher exact test | 0.18 | Fisher exact test | 0.13 | Fisher exact test  | 0.12 | Fisher exact test | 0.91 |
|       |    |    |     | adj p value=0.59  |      | adj p value=1     |      | adj p value=0.75   |      | adj p value=1     |      |
| 13281 | T  | C  | ND5 | Chi2 test         | 0.25 | Chi2 test         | 0.55 | Fisher exact test  | 0.06 | Fisher exact test | 0.11 |
|       |    |    |     | adj p value=0.28  |      | adj p value=1     |      | adj p value=0.0066 |      | adj p value=0.51  |      |
| 13303 | C  | T  | ND5 | Fisher exact test | 0.31 | Fisher exact test | 0.78 | Fisher exact test  | 0    | Fisher exact test | 0    |
|       |    |    |     | adj p value=0.74  |      | adj p value=1     |      | adj p value=0.28   |      | adj p value=0.99  |      |
| 13359 | G  | A  | ND5 | Chi2 test         | 0.36 | Chi2 test         | 0.7  | Fisher exact test  | 0.07 | Fisher exact test | 0.1  |
|       |    |    |     | adj p value=0.95  |      | adj p value=1     |      | adj p value=0.013  |      | adj p value=0.39  |      |
| 13386 | T  | C  | ND5 | Chi2 test         | 0.45 | Chi2 test         | 0.83 | Fisher exact test  | 0.09 | Fisher exact test | 0.11 |
|       |    |    |     | adj p value=1     |      | adj p value=1     |      | adj p value=0.092  |      | adj p value=0.51  |      |
| 13466 | G  | A  | ND5 | Chi2 test         | 0.39 | Chi2 test         | 0.82 | Fisher exact test  | 0.15 | Fisher exact test | 0.18 |
|       |    |    |     | adj p value=1     |      | adj p value=1     |      | adj p value=0.5    |      | adj p value=0.99  |      |
| 13474 | T  | C  | ND5 | Chi2 test         | 0.35 | Chi2 test         | 0.61 | Fisher exact test  | 0.13 | Fisher exact test | 0.21 |
|       |    |    |     | adj p value=1     |      | adj p value=1     |      | adj p value=0.32   |      | adj p value=0.99  |      |

|       |   |   |     |                   |      |                   |      |                    |      |                   |      |
|-------|---|---|-----|-------------------|------|-------------------|------|--------------------|------|-------------------|------|
| 13476 | A | T | ND5 | Chi2 test         | 0.25 | Fisher exact test | 0.28 | Fisher exact test  | 0.16 | Fisher exact test | 0.58 |
|       |   |   |     | adj p value=0.85  |      | adj p value=1     |      | adj p value=0.72   |      | adj p value=1     |      |
| 13476 | A | G | ND5 | Chi2 test         | 0.31 | Chi2 test         | 0.68 | Fisher exact test  | 0.07 | Fisher exact test | 0.1  |
|       |   |   |     | adj p value=1     |      | adj p value=1     |      | adj p value=0.16   |      | adj p value=0.99  |      |
| 13488 | T | C | ND5 | Chi2 test         | 0.15 | Chi2 test         | 0.28 | Fisher exact test  | 0.05 | Fisher exact test | 0.18 |
|       |   |   |     | adj p value=0.034 |      | adj p value=1     |      | adj p value=0.0016 |      | adj p value=0.99  |      |
| 13517 | A | T | ND5 | Chi2 test         | 0.45 | Chi2 test         | 0.72 | Fisher exact test  | 0.19 | Fisher exact test | 0.26 |
|       |   |   |     | adj p value=1     |      | adj p value=1     |      | adj p value=0.75   |      | adj p value=0.99  |      |
| 13548 | A | C | ND5 | Chi2 test         | 0.34 | Chi2 test         | 0.72 | Fisher exact test  | 0    | Fisher exact test | 0    |
|       |   |   |     | adj p value=1     |      | adj p value=1     |      | adj p value=0.12   |      | adj p value=0.73  |      |
| 13581 | T | C | ND5 | Chi2 test         | 0.31 | Chi2 test         | 0.83 | Fisher exact test  | 0    | Fisher exact test | 0    |
|       |   |   |     | adj p value=0.85  |      | adj p value=1     |      | adj p value=0.0033 |      | adj p value=0.058 |      |
| 13584 | C | T | ND5 | Fisher exact test | 0.14 | Fisher exact test | 0.21 | Fisher exact test  | 0    | Fisher exact test | 0    |
|       |   |   |     | adj p value=0.28  |      | adj p value=1     |      | adj p value=0.12   |      | adj p value=0.99  |      |
| 13600 | T | A | ND5 | Fisher exact test | 0.21 | Fisher exact test | 0.37 | Fisher exact test  | 0    | Fisher exact test | 0    |
|       |   |   |     | adj p value=0.58  |      | adj p value=1     |      | adj p value=0.19   |      | adj p value=0.99  |      |
| 13614 | A | T | ND5 | Fisher exact test | 0    | Fisher exact test | 0    | Fisher exact test  | 0    | Fisher exact test |      |
|       |   |   |     | adj p value=0.74  |      | adj p value=1     |      | adj p value=1      |      | adj p value=1     |      |
| 13618 | C | T | ND5 | Fisher exact test | 0    | Fisher exact test | 0    | Fisher exact test  | 0    | Fisher exact test |      |



|       |   |    |     |                   |      |                   |      |                   |      |                   |      |
|-------|---|----|-----|-------------------|------|-------------------|------|-------------------|------|-------------------|------|
|       |   |    |     | adj p value=0.74  |      | adj p value=1     |      | adj p value=1     |      | adj p value=1     |      |
| 13627 | C | T  | ND5 | Fisher exact test | 0    | Fisher exact test | 0    | Fisher exact test | 0    | Fisher exact test |      |
|       |   |    |     | adj p value=0.59  |      | adj p value=1     |      | adj p value=1     |      | adj p value=1     |      |
| 13635 | T | C  | ND5 | Chi2 test         | 0.29 | Fisher exact test | 0.45 | Fisher exact test | 0.09 | Fisher exact test | 0.2  |
|       |   |    |     | adj p value=1     |      | adj p value=1     |      | adj p value=0.35  |      | adj p value=0.99  |      |
| 13635 | T | A  | ND5 | Fisher exact test | 0    | Fisher exact test | 0    | Fisher exact test | 0    | Fisher exact test |      |
|       |   |    |     | adj p value=0.74  |      | adj p value=1     |      | adj p value=1     |      | adj p value=1     |      |
| 13636 | C | CA | ND5 | Fisher exact test | 0    | Fisher exact test | 0    | Fisher exact test | 0    | Fisher exact test |      |
|       |   |    |     | adj p value=0.74  |      | adj p value=1     |      | adj p value=1     |      | adj p value=1     |      |
| 13650 | C | A  | ND5 | Chi2 test         | 0.38 | Fisher exact test | 0.78 | Fisher exact test | 0    | Fisher exact test | 0    |
|       |   |    |     | adj p value=1     |      | adj p value=1     |      | adj p value=0.28  |      | adj p value=0.99  |      |
| 13651 | A | G  | ND5 | Fisher exact test | 0    | Fisher exact test | 0    | Fisher exact test | 0    | Fisher exact test |      |
|       |   |    |     | adj p value=0.74  |      | adj p value=1     |      | adj p value=1     |      | adj p value=1     |      |
| 13674 | T | C  | ND5 | Chi2 test         | 0.35 | Chi2 test         | 0.86 | Fisher exact test | 0.06 | Fisher exact test | 0.07 |
|       |   |    |     | adj p value=1     |      | adj p value=1     |      | adj p value=0.16  |      | adj p value=0.52  |      |
| 13763 | C | A  | ND5 | Fisher exact test | 0    | Fisher exact test | 0    | Fisher exact test | 0    | Fisher exact test |      |
|       |   |    |     | adj p value=0.74  |      | adj p value=1     |      | adj p value=1     |      | adj p value=1     |      |
| 13804 | G | A  | ND5 | Fisher exact test | 0.1  | Fisher exact test | 0.23 | Fisher exact test | 0    | Fisher exact test | 0    |
|       |   |    |     | adj p value=0.72  |      | adj p value=1     |      | adj p value=1     |      | adj p value=0.99  |      |

|       |   |   |     |                   |      |                   |      |                   |      |                   |      |
|-------|---|---|-----|-------------------|------|-------------------|------|-------------------|------|-------------------|------|
| 13816 | A | C | ND5 | Fisher exact test | 0    | Fisher exact test | 0    | Fisher exact test | 0    | Fisher exact test |      |
|       |   |   |     | adj p value=0.74  |      | adj p value=1     |      | adj p value=1     |      | adj p value=1     |      |
| 13886 | T | C | ND5 | Fisher exact test |      |
|       |   |   |     | adj p value=0.73  |      | adj p value=1     |      | adj p value=0.12  |      | adj p value=0.56  |      |
| 13908 | C | T | ND5 | Fisher exact test | 0    | Fisher exact test | 0    | Fisher exact test | 0    | Fisher exact test |      |
|       |   |   |     | adj p value=0.74  |      | adj p value=1     |      | adj p value=1     |      | adj p value=1     |      |
| 14149 | C | T | ND6 | Fisher exact test | 0.07 | Fisher exact test | 0.16 | Fisher exact test | 0    | Fisher exact test | 0    |
|       |   |   |     | adj p value=0.28  |      | adj p value=1     |      | adj p value=0.46  |      | adj p value=0.99  |      |
| 14170 | A | T | ND6 | Fisher exact test | 0.26 | Fisher exact test | 0.61 | Fisher exact test | 0    | Fisher exact test | 0    |
|       |   |   |     | adj p value=0.74  |      | adj p value=1     |      | adj p value=0.71  |      | adj p value=0.99  |      |
| 14172 | T | G | ND6 | Fisher exact test | 0.26 | Fisher exact test | 0.61 | Fisher exact test | 0    | Fisher exact test | 0    |
|       |   |   |     | adj p value=0.74  |      | adj p value=1     |      | adj p value=0.71  |      | adj p value=0.99  |      |
| 14182 | T | C | ND6 | Chi2 test         | 0.29 | Fisher exact test | 0.58 | Fisher exact test | 0.09 | Fisher exact test | 0.16 |
|       |   |   |     | adj p value=1     |      | adj p value=1     |      | adj p value=0.35  |      | adj p value=0.99  |      |
| 14280 | A | G | ND6 | Chi2 test         | 0.19 | Chi2 test         | 0.4  | Fisher exact test | 0.05 | Fisher exact test | 0.12 |
|       |   |   |     | adj p value=0.23  |      | adj p value=1     |      | adj p value=0.053 |      | adj p value=0.99  |      |
| 14305 | G | A | ND6 | Chi2 test         | 0.28 | Chi2 test         | 0.75 | Fisher exact test | 0.04 | Fisher exact test | 0.05 |
|       |   |   |     | adj p value=0.57  |      | adj p value=1     |      | adj p value=0.013 |      | adj p value=0.25  |      |
| 14311 | T | C | ND6 | Chi2 test         | 0.39 | Chi2 test         | 0.93 | Fisher exact test | 0.08 | Fisher exact test | 0.09 |

|       |    |    |     |                   |      |                   |      |                   |      |                   |      |
|-------|----|----|-----|-------------------|------|-------------------|------|-------------------|------|-------------------|------|
|       |    |    |     | adj p value=1     |      | adj p value=1     |      | adj p value=0.24  |      | adj p value=0.79  |      |
| 14323 | G  | A  | ND6 | Chi2 test         | 0.43 | Chi2 test         | 1.03 | Fisher exact test | 0.12 | Fisher exact test | 0.11 |
|       |    |    |     | adj p value=1     |      | adj p value=1     |      | adj p value=0.22  |      | adj p value=0.51  |      |
| 14362 | C  | T  | ND6 | Chi2 test         | 0.47 | Chi2 test         | 1.03 | Fisher exact test | 0.18 | Fisher exact test | 0.17 |
|       |    |    |     | adj p value=1     |      | adj p value=1     |      | adj p value=0.44  |      | adj p value=0.99  |      |
| 14364 | G  | A  | ND6 | Chi2 test         | 0.52 | Chi2 test         | 1.19 | Fisher exact test | 0.18 | Fisher exact test | 0.15 |
|       |    |    |     | adj p value=1     |      | adj p value=1     |      | adj p value=0.44  |      | adj p value=0.71  |      |
| 14368 | C  | T  | ND6 | Chi2 test         | 0.53 | Chi2 test         | 1.16 | Fisher exact test | 0.2  | Fisher exact test | 0.17 |
|       |    |    |     | adj p value=1     |      | adj p value=1     |      | adj p value=0.66  |      | adj p value=0.99  |      |
| 14467 | A  | G  | ND6 | Fisher exact test | 0.1  | Fisher exact test | 0    | Fisher exact test | 0.21 | Fisher exact test |      |
|       |    |    |     | adj p value=0.72  |      | adj p value=1     |      | adj p value=1     |      | adj p value=1     |      |
| 14470 | T  | C  | ND6 | Fisher exact test | 0.21 | Fisher exact test | 0.37 | Fisher exact test | 0.1  | Fisher exact test | 0.28 |
|       |    |    |     | adj p value=0.58  |      | adj p value=1     |      | adj p value=0.53  |      | adj p value=0.99  |      |
| 14494 | T  | C  | ND6 | Fisher exact test | 0.14 | Fisher exact test | 0.33 | Fisher exact test | 0    | Fisher exact test | 0    |
|       |    |    |     | adj p value=0.54  |      | adj p value=1     |      | adj p value=0.46  |      | adj p value=0.99  |      |
| 14524 | A  | G  | ND6 | Fisher exact test | 0    | Fisher exact test | 0    | Fisher exact test | 0    | Fisher exact test |      |
|       |    |    |     | adj p value=0.35  |      | adj p value=1     |      | adj p value=1     |      | adj p value=1     |      |
| 14536 | AA | GT | ND6 | Fisher exact test | 0    | Fisher exact test | 0    | Fisher exact test | 0    | Fisher exact test |      |
|       |    |    |     | adj p value=0.74  |      | adj p value=1     |      | adj p value=1     |      | adj p value=1     |      |

|       |    |    |      |                   |      |                   |      |                   |      |                   |      |
|-------|----|----|------|-------------------|------|-------------------|------|-------------------|------|-------------------|------|
| 14562 | C  | T  | ND6  | Fisher exact test | 0    | Fisher exact test | 0    | Fisher exact test | 0    | Fisher exact test |      |
|       |    |    |      | adj p value=0.74  |      | adj p value=1     |      | adj p value=1     |      | adj p value=1     |      |
| 14608 | C  | T  | ND6  | Fisher exact test | 0    | Fisher exact test | 0    | Fisher exact test | 0    | Fisher exact test |      |
|       |    |    |      | adj p value=0.74  |      | adj p value=1     |      | adj p value=1     |      | adj p value=1     |      |
| 14668 | CA | TG | ND6  | Fisher exact test | 0.17 | Fisher exact test | 0.39 | Fisher exact test | 0    | Fisher exact test | 0    |
|       |    |    |      | adj p value=0.74  |      | adj p value=1     |      | adj p value=0.71  |      | adj p value=0.99  |      |
| 14757 | T  | C  | CYTB | Chi2 test         | 0.73 | Chi2 test         | 0.86 | Chi2 test         | 0.75 | Chi2 test         | 0.88 |
|       |    |    |      | adj p value=1     |      |
| 14774 | C  | T  | CYTB | Fisher exact test | 0.18 | Fisher exact test | 0.13 | Fisher exact test | 0.25 | Fisher exact test | 1.87 |
|       |    |    |      | adj p value=0.59  |      | adj p value=1     |      | adj p value=1     |      | adj p value=1     |      |
| 14776 | A  | G  | CYTB | Fisher exact test | 0.1  | Fisher exact test | 0.11 | Fisher exact test | 0.1  | Fisher exact test | 0.91 |
|       |    |    |      | adj p value=0.19  |      | adj p value=1     |      | adj p value=0.53  |      | adj p value=1     |      |
| 14793 | A  | G  | CYTB | Fisher exact test | 0.21 | Fisher exact test | 0.37 | Fisher exact test | 0.1  | Fisher exact test | 0.28 |
|       |    |    |      | adj p value=0.58  |      | adj p value=1     |      | adj p value=0.53  |      | adj p value=0.99  |      |
| 14798 | T  | C  | CYTB | Fisher exact test | 0    | Fisher exact test | 0    | Fisher exact test | 0    | Fisher exact test |      |
|       |    |    |      | adj p value=0.74  |      | adj p value=1     |      | adj p value=1     |      | adj p value=1     |      |
| 14800 | C  | T  | CYTB | Chi2 test         | 0.37 | Chi2 test         | 0.68 | Fisher exact test | 0.21 | Fisher exact test | 0.31 |
|       |    |    |      | adj p value=1     |      | adj p value=1     |      | adj p value=0.28  |      | adj p value=0.99  |      |
| 14854 | C  | T  | CYTB | Fisher exact test | 0.18 | Fisher exact test | 0.35 | Fisher exact test | 0.07 | Fisher exact test | 0.2  |

|       |    |    |      |                   |      |                   |      |                   |      |                   |      |
|-------|----|----|------|-------------------|------|-------------------|------|-------------------|------|-------------------|------|
|       |    |    |      | adj p value=0.22  |      | adj p value=1     |      | adj p value=0.16  |      | adj p value=0.99  |      |
| 14860 | C  | T  | CYTB | Fisher exact test | 0.18 | Fisher exact test | 0.28 | Fisher exact test | 0.12 | Fisher exact test | 0.44 |
|       |    |    |      | adj p value=0.59  |      | adj p value=1     |      | adj p value=0.75  |      | adj p value=1     |      |
| 14871 | T  | C  | CYTB | Fisher exact test | 0.14 | Fisher exact test | 0.16 | Fisher exact test | 0.14 | Fisher exact test | 0.91 |
|       |    |    |      | adj p value=0.54  |      | adj p value=1     |      | adj p value=1     |      | adj p value=1     |      |
| 14873 | C  | A  | CYTB | Fisher exact test | 0.07 | Fisher exact test | 0    | Fisher exact test | 0.14 | Fisher exact test |      |
|       |    |    |      | adj p value=0.28  |      | adj p value=1     |      | adj p value=1     |      | adj p value=1     |      |
| 14875 | C  | T  | CYTB | Fisher exact test | 0.05 | Fisher exact test | 0    | Fisher exact test | 0.1  | Fisher exact test |      |
|       |    |    |      | adj p value=0.1   |      | adj p value=1     |      | adj p value=0.53  |      | adj p value=1     |      |
| 14881 | C  | G  | CYTB | Fisher exact test | 0.1  | Fisher exact test | 0    | Fisher exact test | 0.21 | Fisher exact test |      |
|       |    |    |      | adj p value=0.72  |      | adj p value=1     |      | adj p value=1     |      | adj p value=1     |      |
| 14883 | CC | TT | CYTB | Fisher exact test | 0    | Fisher exact test | 0    | Fisher exact test | 0    | Fisher exact test |      |
|       |    |    |      | adj p value=0.74  |      | adj p value=1     |      | adj p value=1     |      | adj p value=1     |      |
| 14911 | C  | A  | CYTB | Fisher exact test | 0.17 | Fisher exact test | 0.39 | Fisher exact test | 0    | Fisher exact test | 0    |
|       |    |    |      | adj p value=0.74  |      | adj p value=1     |      | adj p value=0.71  |      | adj p value=0.99  |      |
| 14923 | C  | T  | CYTB | Chi2 test         | 0.31 | Chi2 test         | 0.56 | Fisher exact test | 0.15 | Fisher exact test | 0.26 |
|       |    |    |      | adj p value=1     |      | adj p value=1     |      | adj p value=0.5   |      | adj p value=0.99  |      |
| 14935 | T  | C  | CYTB | Chi2 test         | 0.31 | Chi2 test         | 0.72 | Fisher exact test | 0.09 | Fisher exact test | 0.13 |
|       |    |    |      | adj p value=0.85  |      | adj p value=1     |      | adj p value=0.092 |      | adj p value=0.73  |      |

|       |    |    |      |                   |      |                   |      |                   |      |                   |      |
|-------|----|----|------|-------------------|------|-------------------|------|-------------------|------|-------------------|------|
| 14941 | A  | G  | CYTB | Fisher exact test | 0.16 | Fisher exact test | 0.11 | Fisher exact test | 0.22 | Fisher exact test | 1.87 |
|       |    |    |      | adj p value=0.45  |      | adj p value=1     |      | adj p value=1     |      | adj p value=1     |      |
| 14998 | C  | T  | CYTB | Fisher exact test | 0.17 | Fisher exact test | 0.39 | Fisher exact test | 0    | Fisher exact test | 0    |
|       |    |    |      | adj p value=0.74  |      | adj p value=1     |      | adj p value=0.71  |      | adj p value=0.99  |      |
| 15019 | T  | C  | CYTB | Chi2 test         | 0.3  | Chi2 test         | 0.7  | Fisher exact test | 0.07 | Fisher exact test | 0.1  |
|       |    |    |      | adj p value=0.58  |      | adj p value=1     |      | adj p value=0.013 |      | adj p value=0.39  |      |
| 15043 | G  | C  | CYTB | Chi2 test         | 0.31 | Chi2 test         | 0.68 | Fisher exact test | 0.08 | Fisher exact test | 0.11 |
|       |    |    |      | adj p value=0.65  |      | adj p value=1     |      | adj p value=0.025 |      | adj p value=0.51  |      |
| 15061 | A  | C  | CYTB | Chi2 test         | 0.42 | Chi2 test         | 0.93 | Fisher exact test | 0.1  | Fisher exact test | 0.11 |
|       |    |    |      | adj p value=1     |      | adj p value=1     |      | adj p value=0.15  |      | adj p value=0.51  |      |
| 15074 | TC | CT | CYTB | Chi2 test         | 0.35 | Chi2 test         | 0.69 | Fisher exact test | 0.1  | Fisher exact test | 0.15 |
|       |    |    |      | adj p value=1     |      | adj p value=1     |      | adj p value=0.15  |      | adj p value=0.99  |      |
| 15077 | G  | A  | CYTB | Fisher exact test | 0    | Fisher exact test | 0    | Fisher exact test | 0    | Fisher exact test |      |
|       |    |    |      | adj p value=0.74  |      | adj p value=1     |      | adj p value=1     |      | adj p value=1     |      |
| 15298 | CT | TC | CYTB | Fisher exact test | 0.17 | Fisher exact test | 0.39 | Fisher exact test | 0    | Fisher exact test | 0    |
|       |    |    |      | adj p value=0.74  |      | adj p value=1     |      | adj p value=0.71  |      | adj p value=0.99  |      |
| 15346 | G  | A  | CYTB | Chi2 test         | 0.58 | Chi2 test         | 1.43 | Fisher exact test | 0.1  | Fisher exact test | 0.07 |
|       |    |    |      | adj p value=1     |      | adj p value=1     |      | adj p value=0.53  |      | adj p value=0.52  |      |
| 15596 | G  | A  | CYTB | Fisher exact test | 0.08 | Fisher exact test | 0.19 | Fisher exact test | 0    | Fisher exact test | 0    |

|       |    |    |      |                   |      |                   |      |                   |   |                   |   |
|-------|----|----|------|-------------------|------|-------------------|------|-------------------|---|-------------------|---|
|       |    |    |      | adj p value=0.49  |      | adj p value=1     |      | adj p value=0.71  |   | adj p value=0.99  |   |
| 15598 | C  | T  | CYTB | Fisher exact test | 0.1  | Fisher exact test | 0.23 | Fisher exact test | 0 | Fisher exact test | 0 |
|       |    |    |      | adj p value=0.72  |      | adj p value=1     |      | adj p value=1     |   | adj p value=0.99  |   |
| 15601 | T  | C  | CYTB | Fisher exact test | 0.1  | Fisher exact test | 0.23 | Fisher exact test | 0 | Fisher exact test | 0 |
|       |    |    |      | adj p value=0.72  |      | adj p value=1     |      | adj p value=1     |   | adj p value=0.99  |   |
| 15604 | C  | T  | CYTB | Fisher exact test | 0.1  | Fisher exact test | 0.23 | Fisher exact test | 0 | Fisher exact test | 0 |
|       |    |    |      | adj p value=0.72  |      | adj p value=1     |      | adj p value=1     |   | adj p value=0.99  |   |
| 15617 | G  | A  | CYTB | Fisher exact test | 0    | Fisher exact test | 0    | Fisher exact test | 0 | Fisher exact test |   |
|       |    |    |      | adj p value=0.35  |      | adj p value=1     |      | adj p value=1     |   | adj p value=1     |   |
| 15619 | C  | T  | CYTB | Fisher exact test | 0.07 | Fisher exact test | 0.16 | Fisher exact test | 0 | Fisher exact test | 0 |
|       |    |    |      | adj p value=0.28  |      | adj p value=1     |      | adj p value=0.46  |   | adj p value=0.99  |   |
| 15622 | T  | A  | CYTB | Fisher exact test | 0.08 | Fisher exact test | 0.19 | Fisher exact test | 0 | Fisher exact test | 0 |
|       |    |    |      | adj p value=0.49  |      | adj p value=1     |      | adj p value=0.71  |   | adj p value=0.99  |   |
| 15622 | T  | C  | CYTB | Fisher exact test | 0    | Fisher exact test | 0    | Fisher exact test | 0 | Fisher exact test |   |
|       |    |    |      | adj p value=0.74  |      | adj p value=1     |      | adj p value=1     |   | adj p value=1     |   |
| 15628 | AT | TC | CYTB | Fisher exact test | 0.07 | Fisher exact test | 0.16 | Fisher exact test | 0 | Fisher exact test | 0 |
|       |    |    |      | adj p value=0.28  |      | adj p value=1     |      | adj p value=0.46  |   | adj p value=0.99  |   |
| 15653 | AT | GC | CYTB | Fisher exact test | 0.09 | Fisher exact test | 0.21 | Fisher exact test | 0 | Fisher exact test | 0 |
|       |    |    |      | adj p value=0.12  |      | adj p value=1     |      | adj p value=0.12  |   | adj p value=0.99  |   |

|       |    |    |      |                   |      |                   |      |                   |      |                   |      |
|-------|----|----|------|-------------------|------|-------------------|------|-------------------|------|-------------------|------|
| 15658 | C  | T  | CYTB | Fisher exact test | 0.09 | Fisher exact test | 0.21 | Fisher exact test | 0    | Fisher exact test | 0    |
|       |    |    |      | adj p value=0.12  |      | adj p value=1     |      | adj p value=0.12  |      | adj p value=0.99  |      |
| 15661 | C  | T  | CYTB | Fisher exact test | 0.1  | Fisher exact test | 0.24 | Fisher exact test | 0    | Fisher exact test | 0    |
|       |    |    |      | adj p value=0.19  |      | adj p value=1     |      | adj p value=0.19  |      | adj p value=0.99  |      |
| 15664 | C  | A  | CYTB | Fisher exact test | 0.1  | Fisher exact test | 0.24 | Fisher exact test | 0    | Fisher exact test | 0    |
|       |    |    |      | adj p value=0.19  |      | adj p value=1     |      | adj p value=0.19  |      | adj p value=0.99  |      |
| 15699 | G  | A  | CYTB | Fisher exact test | 0.16 | Fisher exact test | 0.24 | Fisher exact test | 0.1  | Fisher exact test | 0.44 |
|       |    |    |      | adj p value=0.45  |      | adj p value=1     |      | adj p value=0.53  |      | adj p value=1     |      |
| 15704 | C  | T  | CYTB | Fisher exact test | 0.16 | Fisher exact test | 0.24 | Fisher exact test | 0.1  | Fisher exact test | 0.44 |
|       |    |    |      | adj p value=0.45  |      | adj p value=1     |      | adj p value=0.53  |      | adj p value=1     |      |
| 15714 | CA | TC | CYTB | Fisher exact test | 0.14 | Fisher exact test | 0.1  | Fisher exact test | 0.19 | Fisher exact test | 1.87 |
|       |    |    |      | adj p value=0.28  |      | adj p value=1     |      | adj p value=0.75  |      | adj p value=1     |      |
| 15718 | T  | A  | CYTB | Fisher exact test | 0.14 | Fisher exact test | 0.1  | Fisher exact test | 0.19 | Fisher exact test | 1.87 |
|       |    |    |      | adj p value=0.28  |      | adj p value=1     |      | adj p value=0.75  |      | adj p value=1     |      |
| 15725 | C  | T  | CYTB | Fisher exact test | 0.16 | Fisher exact test | 0.11 | Fisher exact test | 0.22 | Fisher exact test | 1.87 |
|       |    |    |      | adj p value=0.45  |      | adj p value=1     |      | adj p value=1     |      | adj p value=1     |      |
| 15734 | G  | A  | CYTB | Fisher exact test | 0.1  | Fisher exact test | 0.11 | Fisher exact test | 0.1  | Fisher exact test | 0.91 |
|       |    |    |      | adj p value=0.19  |      | adj p value=1     |      | adj p value=0.53  |      | adj p value=1     |      |
| 15745 | C  | T  | CYTB | Fisher exact test | 0.12 | Fisher exact test | 0.13 | Fisher exact test | 0.12 | Fisher exact test | 0.91 |



|       |      |      |      |                   |      |                   |      |                   |      |                   |      |
|-------|------|------|------|-------------------|------|-------------------|------|-------------------|------|-------------------|------|
|       |      |      |      | adj p value=0.33  |      | adj p value=1     |      | adj p value=0.75  |      | adj p value=1     |      |
| 15747 | TT   | CC   | CYTB | Fisher exact test | 0.12 | Fisher exact test | 0.13 | Fisher exact test | 0.12 | Fisher exact test | 0.91 |
|       |      |      |      | adj p value=0.33  |      | adj p value=1     |      | adj p value=0.75  |      | adj p value=1     |      |
| 15760 | C    | T    | CYTB | Fisher exact test | 0.06 | Fisher exact test | 0    | Fisher exact test | 0.12 | Fisher exact test |      |
|       |      |      |      | adj p value=0.16  |      | adj p value=1     |      | adj p value=0.75  |      | adj p value=1     |      |
| 15775 | A    | G    | CYTB | Fisher exact test | 0.06 | Fisher exact test | 0    | Fisher exact test | 0.12 | Fisher exact test |      |
|       |      |      |      | adj p value=0.16  |      | adj p value=1     |      | adj p value=0.75  |      | adj p value=1     |      |
| 15777 | G    | A    | CYTB | Fisher exact test | 0.06 | Fisher exact test | 0    | Fisher exact test | 0.12 | Fisher exact test |      |
|       |      |      |      | adj p value=0.16  |      | adj p value=1     |      | adj p value=0.75  |      | adj p value=1     |      |
| 15786 | T    | TCAC | CYTB | Fisher exact test | 0.06 | Fisher exact test | 0    | Fisher exact test | 0.12 | Fisher exact test |      |
|       |      |      |      | adj p value=0.16  |      | adj p value=1     |      | adj p value=0.75  |      | adj p value=1     |      |
| 15793 | CATT | C    | CYTB | Fisher exact test | 0.06 | Fisher exact test | 0    | Fisher exact test | 0.12 | Fisher exact test |      |
|       |      |      |      | adj p value=0.16  |      | adj p value=1     |      | adj p value=0.75  |      | adj p value=1     |      |
| 15812 | G    | A    | CYTB | Fisher exact test | 0    | Fisher exact test | 0    | Fisher exact test | 0    | Fisher exact test |      |
|       |      |      |      | adj p value=0.74  |      | adj p value=1     |      | adj p value=1     |      | adj p value=1     |      |
| 15924 | A    | G    | TRNT | Fisher exact test | 0    | Fisher exact test | 0    | Fisher exact test | 0    | Fisher exact test |      |
|       |      |      |      | adj p value=0.74  |      | adj p value=1     |      | adj p value=1     |      | adj p value=1     |      |
| 16034 | G    | A    | NA   | Fisher exact test |      |
|       |      |      |      | adj p value=0.74  |      | adj p value=1     |      | adj p value=0.31  |      | adj p value=0.99  |      |

|       |    |    |    |                   |      |                   |      |                   |      |                   |      |
|-------|----|----|----|-------------------|------|-------------------|------|-------------------|------|-------------------|------|
| 16035 | G  | A  | NA | Fisher exact test |      |
|       |    |    |    | adj p value=0.57  |      | adj p value=1     |      | adj p value=0.027 |      | adj p value=0.27  |      |
| 16036 | G  | A  | NA | Fisher exact test |      |
|       |    |    |    | adj p value=0.73  |      | adj p value=1     |      | adj p value=0.12  |      | adj p value=0.56  |      |
| 16093 | T  | C  | NA | Fisher exact test | 0.16 | Fisher exact test | 0.24 | Fisher exact test | 0.1  | Fisher exact test | 0.44 |
|       |    |    |    | adj p value=0.45  |      | adj p value=1     |      | adj p value=0.53  |      | adj p value=1     |      |
| 16124 | T  | C  | NA | Fisher exact test | 9.15 | Fisher exact test | 1.31 | Fisher exact test | 19   | Fisher exact test | 14.5 |
|       |    |    |    | adj p value=0.59  |      | adj p value=1     |      | adj p value=0.092 |      | adj p value=0.51  |      |
| 16218 | C  | T  | NA | Chi2 test         | 0.82 | Chi2 test         | 1.56 | Fisher exact test | 0.32 | Fisher exact test | 0.2  |
|       |    |    |    | adj p value=1     |      | adj p value=1     |      | adj p value=1     |      | adj p value=0.92  |      |
| 16230 | A  | G  | NA | Chi2 test         | 0.87 | Chi2 test         | 1.29 | Chi2 test         | 0.56 | Chi2 test         | 0.43 |
|       |    |    |    | adj p value=1     |      | adj p value=1     |      | adj p value=1     |      | adj p value=1     |      |
| 16249 | T  | C  | NA | Chi2 test         | 1.19 | Chi2 test         | 1.75 | Chi2 test         | 0.75 | Chi2 test         | 0.43 |
|       |    |    |    | adj p value=1     |      | adj p value=1     |      | adj p value=1     |      | adj p value=1     |      |
| 16257 | C  | CA | NA | Chi2 test         | 1.26 | Chi2 test         | 1.97 | Chi2 test         | 0.72 | Chi2 test         | 0.37 |
|       |    |    |    | adj p value=1     |      | adj p value=1     |      | adj p value=1     |      | adj p value=1     |      |
| 16263 | TC | T  | NA | Chi2 test         | 1.18 | Chi2 test         | 1.97 | Chi2 test         | 0.72 | Chi2 test         | 0.37 |
|       |    |    |    | adj p value=1     |      | adj p value=1     |      | adj p value=1     |      | adj p value=1     |      |
| 16265 | A  | T  | NA | Fisher exact test | 0    | Fisher exact test | 0    | Fisher exact test | 0    | Fisher exact test |      |

|       |   |   |    |                   |      |                   |      |                   |      |                   |      |
|-------|---|---|----|-------------------|------|-------------------|------|-------------------|------|-------------------|------|
|       |   |   |    | adj p value=0.74  |      | adj p value=1     |      | adj p value=1     |      | adj p value=1     |      |
| 16284 | A | G | NA | Chi2 test         | 1.42 | Chi2 test         | 2.23 | Chi2 test         | 0.81 | Chi2 test         | 0.37 |
|       |   |   |    | adj p value=1     |      | adj p value=1     |      | adj p value=1     |      | adj p value=1     |      |
| 16288 | T | C | NA | Chi2 test         | 1.33 | Chi2 test         | 2.23 | Chi2 test         | 0.69 | Chi2 test         | 0.31 |
|       |   |   |    | adj p value=1     |      | adj p value=1     |      | adj p value=1     |      | adj p value=1     |      |
| 16290 | C | T | NA | Chi2 test         | 2.32 | Chi2 test         | 2.94 | Chi2 test         | 1.46 | Chi2 test         | 0.5  |
|       |   |   |    | adj p value=1     |      | adj p value=1     |      | adj p value=1     |      | adj p value=1     |      |
| 16293 | A | C | NA | Chi2 test         | 1.42 | Chi2 test         | 2.54 | Chi2 test         | 0.64 | Chi2 test         | 0.25 |
|       |   |   |    | adj p value=1     |      | adj p value=1     |      | adj p value=1     |      | adj p value=1     |      |
| 16293 | A | G | NA | Fisher exact test | 0.14 | Fisher exact test | 0    | Fisher exact test | 0.29 | Fisher exact test |      |
|       |   |   |    | adj p value=0.28  |      | adj p value=1     |      | adj p value=1     |      | adj p value=0.99  |      |
| 16301 | C | T | NA | Chi2 test         | 1.32 | Chi2 test         | 1.93 | Chi2 test         | 0.78 | Chi2 test         | 0.4  |
|       |   |   |    | adj p value=1     |      | adj p value=1     |      | adj p value=1     |      | adj p value=1     |      |

**Supplementary Table S7:** Heteroplasmy level test between the three groups (ASY, moderate CCC and severe CCC) and heteroplasmy level analyses between the groups (two by two: ASY vs CCC; ASY vs Moderate CCC; ASY vs Severe CCC and Moderate CCC vs Severe CCC)

| Pos | Ref | Alt | Gene | Heteroplasmy<br>Kruskal Wallis<br>adj p value | Heteroplasmy<br>ASYvsCCC<br>adj p value | Heteroplasmy<br>ASYvsMOD<br>adj p value | Heteroplasmy<br>ASYvsSEV<br>adj p value |
|-----|-----|-----|------|-----------------------------------------------|-----------------------------------------|-----------------------------------------|-----------------------------------------|
| 106 | G   | A   | NA   | 1,90E-01                                      | 1,50E-01                                | 8,60E-01                                | 4,90E-02                                |
| 159 | T   | G   | NA   | 1,90E-01                                      | 6,30E-02                                | 5,90E-01                                | 3,50E-02                                |
| 163 | G   | A   | NA   | 2,30E-01                                      | 6,30E-02                                | 5,10E-01                                | 4,00E-02                                |
| 180 | TA  | CC  | NA   | 2,60E-01                                      | 6,30E-02                                | 3,20E-01                                | 4,40E-02                                |
| 185 | G   | A   | NA   | 2,60E-01                                      | 3,30E-02                                | 1,90E-01                                | 7,10E-02                                |
| 302 | A   | AC  | NA   | 8,70E-02                                      | 1,00E-01                                | 8,10E-01                                | 2,80E-02                                |
| 310 | T   | TC  | NA   | 1,80E-01                                      | 9,00E-02                                | 3,90E-01                                | 4,40E-02                                |
| 310 | T   | C   | NA   | 5,20E-01                                      | 5,10E-01                                | 6,10E-01                                | 3,30E-01                                |
| 318 | T   | C   | NA   | 1,40E-01                                      | 5,00E-02                                | 2,00E-01                                | 7,30E-02                                |
| 322 | G   | T   | NA   | 9,80E-03                                      | 1,90E-01                                | 9,00E-01                                | 1,30E-02                                |
| 456 | C   | T   | NA   | 4,00E-02                                      | 2,60E-01                                | 1,50E-01                                | 1,00E+00                                |

|     |       |    |      |          |          |          |          |
|-----|-------|----|------|----------|----------|----------|----------|
| 493 | A     | G  | NA   | 2,60E-01 | 3,30E-02 | 1,90E-01 | 7,10E-02 |
| 499 | G     | C  | NA   | 2,10E-02 | 9,40E-02 | 8,60E-01 | 9,30E-03 |
| 564 | G     | A  | NA   | 7,50E-02 | 6,30E-02 | 5,80E-01 | 2,60E-02 |
| 750 | A     | G  | RNR1 | 4,20E-05 | 3,00E-03 | 5,50E-01 | 3,90E-06 |
| 756 | C     | T  | RNR1 | 6,90E-02 | 1,80E-01 | 9,70E-01 | 2,60E-02 |
| 764 | ACG   | A  | RNR1 | 2,60E-01 | 3,30E-02 | 1,90E-01 | 7,10E-02 |
| 766 | GCAGC | G  | RNR1 | 2,60E-01 | 3,30E-02 | 1,90E-01 | 7,10E-02 |
| 769 | GC    | TT | RNR1 | 4,00E-02 | 1,90E-01 | 1,50E-01 | 1,00E+00 |
| 769 | GC    | CA | RNR1 | 1,80E-01 | 2,80E-02 | 2,00E-01 | 2,20E-02 |
| 809 | G     | A  | RNR1 | 2,60E-01 | 3,30E-02 | 1,90E-01 | 7,10E-02 |
| 813 | A     | G  | RNR1 | 1,50E-02 | 3,60E-01 | 6,50E-01 | 1,90E-02 |
| 825 | T     | A  | RNR1 | 8,50E-02 | 6,30E-02 | 7,40E-01 | 2,00E-02 |
| 828 | C     | T  | RNR1 | 2,60E-01 | 6,30E-02 | 3,30E-01 | 4,50E-02 |
| 843 | G     | A  | RNR1 | 2,00E-01 | 1,30E-02 | 1,50E-01 | 3,50E-02 |
| 870 | C     | T  | RNR1 | 1,80E-01 | 1,40E-01 | 8,50E-01 | 4,70E-02 |
| 877 | G     | C  | RNR1 | 2,10E-01 | 6,30E-02 | 5,30E-01 | 4,00E-02 |
| 880 | C     | T  | RNR1 | 2,60E-01 | 3,30E-02 | 1,90E-01 | 7,10E-02 |

|      |     |     |      |          |          |          |          |
|------|-----|-----|------|----------|----------|----------|----------|
| 883  | T   | G   | RNR1 | 1,60E-01 | 4,20E-02 | 3,70E-01 | 2,40E-02 |
| 906  | C   | T   | RNR1 | 1,80E-01 | 5,00E-02 | 2,00E-01 | 3,50E-02 |
| 917  | CA  | TG  | RNR1 | 2,00E-01 | 1,30E-02 | 1,50E-01 | 3,50E-02 |
| 921  | TC  | CT  | RNR1 | 1,50E-01 | 3,30E-02 | 1,90E-01 | 4,50E-02 |
| 921  | T   | C   | RNR1 | 1,50E-02 | 1,10E-01 | 1,00E+00 | 2,00E-02 |
| 930  | GC  | CT  | RNR1 | 2,00E-01 | 1,30E-02 | 1,50E-01 | 3,50E-02 |
| 933  | G   | A   | RNR1 | 2,60E-01 | 3,30E-02 | 1,90E-01 | 7,10E-02 |
| 964  | C   | CT  | RNR1 | 2,60E-01 | 3,30E-02 | 1,90E-01 | 7,10E-02 |
| 1009 | C   | T   | RNR1 | 1,30E-01 | 1,80E-01 | 8,60E-01 | 3,50E-02 |
| 1039 | AT  | GC  | RNR1 | 1,80E-01 | 1,80E-02 | 2,00E-01 | 2,50E-02 |
| 1104 | A   | C   | RNR1 | 2,60E-01 | 3,30E-02 | 1,90E-01 | 7,10E-02 |
| 1106 | CTC | TAT | RNR1 | 8,20E-02 | 2,10E-03 | 7,60E-02 | 9,30E-03 |
| 1111 | C   | T   | RNR1 | 7,40E-02 | 1,20E-01 | 8,80E-01 | 2,00E-02 |
| 1120 | C   | T   | RNR1 | 1,80E-02 | 1,50E-02 | 4,80E-01 | 1,90E-03 |
| 1128 | CTG | C   | RNR1 | 1,40E-01 | 1,10E-01 | 6,80E-01 | 3,00E-02 |
| 1128 | C   | CAA | RNR1 | 2,00E-01 | 1,30E-02 | 1,50E-01 | 3,50E-02 |
| 1129 | TGC | T   | RNR1 | 2,00E-01 | 1,30E-02 | 1,50E-01 | 3,50E-02 |

|      |    |     |      |          |          |          |          |
|------|----|-----|------|----------|----------|----------|----------|
| 1131 | C  | CAT | RNR1 | 1,40E-01 | 1,10E-01 | 6,90E-01 | 3,00E-02 |
| 1133 | CG | TA  | RNR1 | 2,00E-01 | 1,30E-02 | 1,50E-01 | 3,50E-02 |
| 1141 | C  | T   | RNR1 | 1,30E-01 | 5,30E-03 | 1,10E-01 | 1,90E-02 |
| 1147 | G  | A   | RNR1 | 1,70E-02 | 2,00E-02 | 4,60E-01 | 2,00E-03 |
| 1151 | C  | A   | RNR1 | 1,70E-03 | 5,30E-03 | 3,70E-01 | 1,40E-04 |
| 1156 | C  | G   | RNR1 | 2,00E-01 | 1,30E-02 | 1,50E-01 | 3,50E-02 |
| 1173 | C  | T   | RNR1 | 6,60E-03 | 1,20E-02 | 4,30E-01 | 7,40E-04 |
| 1178 | G  | A   | RNR1 | 1,70E-01 | 1,20E-01 | 8,40E-01 | 4,20E-02 |
| 1185 | C  | T   | RNR1 | 7,30E-03 | 1,00E-02 | 3,80E-01 | 7,40E-04 |
| 1197 | G  | A   | RNR1 | 1,60E-02 | 2,10E-03 | 1,90E-01 | 1,10E-03 |
| 1211 | G  | A   | RNR1 | 2,90E-05 | 9,20E-05 | 1,50E-01 | 9,50E-07 |
| 1217 | G  | A   | RNR1 | 5,60E-03 | 1,00E-04 | 1,50E-02 | 1,00E-03 |
| 1220 | A  | G   | RNR1 | 2,60E-02 | 3,30E-04 | 4,00E-02 | 1,90E-03 |
| 1226 | C  | T   | RNR1 | 7,20E-02 | 3,00E-03 | 1,40E-01 | 6,30E-03 |
| 1227 | G  | A   | RNR1 | 4,20E-06 | 4,40E-06 | 1,10E-01 | 6,60E-08 |
| 1228 | AT | A   | RNR1 | 2,60E-01 | 3,30E-02 | 1,90E-01 | 7,10E-02 |
| 1230 | CA | TT  | RNR1 | 1,90E-04 | 1,50E-04 | 1,90E-01 | 2,70E-06 |

|      |     |     |      |          |          |          |          |
|------|-----|-----|------|----------|----------|----------|----------|
| 1240 | A   | G   | RNR1 | 1,30E-01 | 5,30E-03 | 1,10E-01 | 1,90E-02 |
| 1247 | G   | GCC | RNR1 | 6,70E-02 | 4,20E-03 | 1,50E-01 | 9,10E-03 |
| 1249 | T   | C   | RNR1 | 1,20E-06 | 3,20E-06 | 7,90E-02 | 6,60E-08 |
| 1253 | C   | A   | RNR1 | 2,20E-01 | 6,30E-02 | 4,70E-01 | 3,60E-02 |
| 1257 | T   | A   | RNR1 | 9,50E-03 | 3,00E-03 | 2,00E-01 | 4,20E-04 |
| 1261 | CC  | GG  | RNR1 | 2,60E-01 | 3,30E-02 | 1,90E-01 | 7,10E-02 |
| 1263 | G   | T   | RNR1 | 3,30E-04 | 1,30E-03 | 2,40E-01 | 1,20E-05 |
| 1281 | TG  | T   | RNR1 | 1,00E-01 | 6,30E-02 | 5,80E-01 | 1,90E-02 |
| 1282 | GAT | G   | RNR1 | 1,20E-04 | 1,80E-04 | 1,90E-01 | 2,10E-06 |
| 1284 | TG  | AA  | RNR1 | 1,80E-01 | 1,10E-01 | 6,30E-01 | 3,70E-02 |
| 1285 | G   | GA  | RNR1 | 6,10E-05 | 1,10E-04 | 1,90E-01 | 9,50E-07 |
| 1289 | GC  | TT  | RNR1 | 2,00E-01 | 1,30E-02 | 1,50E-01 | 3,50E-02 |
| 1290 | C   | T   | RNR1 | 1,40E-01 | 1,30E-01 | 7,90E-01 | 3,40E-02 |
| 1291 | T   | C   | RNR1 | 3,00E-02 | 1,20E-02 | 3,10E-01 | 2,20E-03 |
| 1291 | TA  | CG  | RNR1 | 8,10E-02 | 2,20E-01 | 9,80E-01 | 3,20E-02 |
| 1292 | A   | G   | RNR1 | 5,50E-02 | 6,40E-02 | 9,00E-01 | 1,40E-02 |
| 1293 | C   | T   | RNR1 | 1,50E-01 | 5,70E-02 | 2,60E-01 | 2,60E-02 |



|      |     |     |      |          |          |          |          |
|------|-----|-----|------|----------|----------|----------|----------|
| 1295 | A   | G   | RNR1 | 1,00E-04 | 1,40E-03 | 2,60E-01 | 5,30E-06 |
| 1303 | G   | A   | RNR1 | 1,70E-04 | 5,70E-04 | 2,00E-01 | 5,30E-06 |
| 1310 | C   | T   | RNR1 | 1,30E-03 | 6,50E-03 | 4,60E-01 | 1,10E-04 |
| 1311 | C   | CTA | RNR1 | 3,80E-02 | 1,30E-02 | 3,30E-01 | 2,80E-03 |
| 1311 | C   | A   | RNR1 | 2,30E-01 | 3,80E-02 | 2,00E-01 | 5,10E-02 |
| 1312 | C   | T   | RNR1 | 1,50E-02 | 4,20E-02 | 7,20E-01 | 2,50E-03 |
| 1314 | CGT | C   | RNR1 | 3,90E-02 | 1,30E-02 | 3,30E-01 | 2,80E-03 |
| 1315 | G   | A   | RNR1 | 6,40E-05 | 1,50E-04 | 1,70E-01 | 1,70E-06 |
| 1320 | G   | A   | RNR1 | 7,20E-06 | 1,50E-04 | 2,00E-01 | 2,70E-07 |
| 1323 | G   | T   | RNR1 | 8,00E-03 | 2,90E-03 | 2,10E-01 | 3,40E-04 |
| 1362 | GC  | G   | RNR1 | 3,30E-02 | 6,20E-03 | 2,00E-01 | 1,90E-03 |
| 1364 | T   | A   | RNR1 | 1,10E-02 | 1,50E-03 | 1,90E-01 | 4,30E-04 |
| 1367 | A   | G   | RNR1 | 1,50E-02 | 1,40E-03 | 1,70E-01 | 6,50E-04 |
| 1375 | C   | CA  | RNR1 | 1,80E-02 | 9,80E-03 | 3,30E-01 | 1,50E-03 |
| 1376 | CC  | TT  | RNR1 | 2,40E-02 | 3,30E-02 | 5,60E-01 | 3,20E-03 |
| 1376 | C   | T   | RNR1 | 1,40E-01 | 1,20E-01 | 8,90E-01 | 3,50E-02 |
| 1384 | ACT | A   | RNR1 | 2,60E-02 | 1,90E-03 | 1,60E-01 | 1,50E-03 |

|      |     |        |      |          |          |          |          |
|------|-----|--------|------|----------|----------|----------|----------|
| 1387 | A   | ATGTCG | RNR1 | 1,50E-02 | 1,40E-03 | 1,80E-01 | 6,80E-04 |
| 1388 | C   | T      | RNR1 | 2,00E-01 | 1,30E-02 | 1,50E-01 | 3,50E-02 |
| 1391 | T   | C      | RNR1 | 1,70E-03 | 1,40E-03 | 2,00E-01 | 5,40E-05 |
| 1393 | GC  | G      | RNR1 | 2,00E-01 | 1,30E-02 | 1,50E-01 | 3,50E-02 |
| 1393 | G   | A      | RNR1 | 1,40E-05 | 1,40E-03 | 4,10E-01 | 1,80E-06 |
| 1396 | C   | G      | RNR1 | 2,50E-03 | 1,30E-03 | 2,00E-01 | 7,10E-05 |
| 1398 | T   | G      | RNR1 | 1,40E-01 | 1,10E-01 | 6,90E-01 | 3,00E-02 |
| 1405 | CT  | TC     | RNR1 | 1,40E-01 | 1,10E-01 | 8,40E-01 | 4,10E-02 |
| 1405 | C   | T      | RNR1 | 7,10E-02 | 6,30E-02 | 6,60E-01 | 1,30E-02 |
| 1412 | G   | GC     | RNR1 | 1,10E-02 | 2,00E-02 | 5,90E-01 | 2,10E-03 |
| 1413 | TCG | T      | RNR1 | 2,00E-01 | 1,30E-02 | 1,50E-01 | 3,50E-02 |
| 1414 | CG  | C      | RNR1 | 1,80E-02 | 5,80E-02 | 8,50E-01 | 6,30E-03 |
| 1420 | T   | A      | RNR1 | 7,30E-03 | 1,10E-02 | 5,20E-01 | 1,10E-03 |
| 1431 | G   | A      | RNR1 | 3,00E-02 | 1,70E-02 | 4,10E-01 | 4,00E-03 |
| 1436 | C   | T      | RNR1 | 3,60E-02 | 2,30E-02 | 4,90E-01 | 5,50E-03 |
| 1437 | T   | C      | RNR1 | 1,10E-01 | 6,60E-02 | 8,00E-01 | 2,10E-02 |
| 1438 | A   | G      | RNR1 | 6,10E-06 | 5,30E-03 | 8,10E-01 | 4,30E-06 |

|      |    |    |      |          |          |          |          |
|------|----|----|------|----------|----------|----------|----------|
| 1443 | T  | C  | RNR1 | 1,00E-02 | 5,30E-03 | 2,30E-01 | 1,10E-03 |
| 1450 | C  | T  | RNR1 | 8,40E-02 | 4,60E-02 | 5,60E-01 | 1,50E-02 |
| 1453 | A  | G  | RNR1 | 1,60E-02 | 1,70E-03 | 1,90E-01 | 7,40E-04 |
| 1454 | G  | A  | RNR1 | 9,50E-02 | 3,70E-02 | 4,70E-01 | 1,60E-02 |
| 1460 | C  | T  | RNR1 | 4,00E-02 | 3,60E-02 | 6,00E-01 | 7,90E-03 |
| 1462 | G  | A  | RNR1 | 6,00E-02 | 1,00E-01 | 9,70E-01 | 2,10E-02 |
| 1466 | CC | TA | RNR1 | 2,60E-01 | 3,30E-02 | 1,90E-01 | 7,10E-02 |
| 1467 | C  | A  | RNR1 | 9,00E-02 | 3,80E-02 | 5,00E-01 | 1,50E-02 |
| 1469 | G  | A  | RNR1 | 2,60E-01 | 3,30E-02 | 1,90E-01 | 7,10E-02 |
| 1474 | G  | A  | RNR1 | 1,20E-01 | 7,20E-03 | 1,70E-01 | 1,30E-02 |
| 1476 | GT | AC | RNR1 | 2,60E-01 | 3,90E-02 | 2,00E-01 | 4,70E-02 |
| 1477 | T  | C  | RNR1 | 2,60E-01 | 3,30E-02 | 1,90E-01 | 7,10E-02 |
| 1485 | G  | A  | RNR1 | 2,60E-01 | 3,30E-02 | 1,90E-01 | 7,10E-02 |
| 1556 | C  | T  | RNR1 | 1,80E-02 | 5,80E-03 | 2,00E-01 | 1,50E-03 |
| 1597 | C  | T  | RNR1 | 4,60E-02 | 9,80E-04 | 6,90E-02 | 4,10E-03 |
| 1604 | GA | AG | TRNV | 8,20E-02 | 2,10E-03 | 7,60E-02 | 9,30E-03 |
| 1626 | C  | T  | TRNV | 1,80E-01 | 1,70E-02 | 2,00E-01 | 2,40E-02 |

|      |        |     |      |          |          |          |          |
|------|--------|-----|------|----------|----------|----------|----------|
| 1628 | CAA    | TGT | TRNV | 2,60E-01 | 3,30E-02 | 1,90E-01 | 7,10E-02 |
| 1637 | CTTAGG | C   | TRNV | 2,60E-01 | 3,30E-02 | 1,90E-01 | 7,10E-02 |
| 1642 | G      | A   | TRNV | 2,60E-01 | 3,30E-02 | 1,90E-01 | 7,10E-02 |
| 1651 | A      | C   | TRNV | 1,30E-01 | 5,30E-03 | 1,10E-01 | 1,90E-02 |
| 1653 | T      | A   | TRNV | 1,80E-01 | 1,70E-02 | 2,00E-01 | 2,40E-02 |
| 1654 | T      | C   | TRNV | 1,30E-01 | 1,40E-01 | 8,10E-01 | 3,30E-02 |
| 1657 | C      | T   | TRNV | 8,20E-02 | 2,10E-03 | 7,60E-02 | 9,30E-03 |
| 1664 | G      | A   | TRNV | 1,10E-01 | 6,30E-02 | 7,80E-01 | 2,10E-02 |
| 1666 | TC     | CT  | TRNV | 2,60E-01 | 3,30E-02 | 1,90E-01 | 7,10E-02 |
| 1673 | T      | C   | RNR2 | 1,30E-01 | 1,30E-01 | 8,10E-01 | 3,20E-02 |
| 1693 | C      | T   | RNR2 | 1,10E-01 | 2,30E-02 | 1,90E-01 | 2,20E-02 |
| 1808 | AT     | GC  | RNR2 | 1,80E-01 | 1,70E-02 | 2,00E-01 | 2,40E-02 |
| 1824 | T      | C   | RNR2 | 1,90E-01 | 3,30E-02 | 2,10E-01 | 3,40E-02 |
| 1874 | A      | T   | RNR2 | 2,60E-01 | 3,90E-02 | 2,00E-01 | 4,70E-02 |
| 1882 | AG     | TA  | RNR2 | 2,60E-01 | 3,90E-02 | 2,00E-01 | 4,70E-02 |
| 1883 | G      | A   | RNR2 | 1,30E-01 | 6,30E-02 | 3,30E-01 | 2,40E-02 |
| 1888 | G      | A   | RNR2 | 1,20E-01 | 1,90E-01 | 9,30E-01 | 3,90E-02 |

|      |        |      |      |          |          |          |          |
|------|--------|------|------|----------|----------|----------|----------|
| 1896 | T      | C    | RNR2 | 1,10E-01 | 2,10E-02 | 1,90E-01 | 2,10E-02 |
| 1900 | A      | G    | RNR2 | 1,60E-02 | 1,90E-03 | 1,10E-01 | 1,30E-03 |
| 1905 | CG     | TA   | RNR2 | 4,00E-02 | 1,40E-03 | 1,10E-01 | 2,80E-03 |
| 1924 | T      | C    | RNR2 | 1,30E-01 | 4,50E-02 | 2,40E-01 | 2,10E-02 |
| 1934 | T      | G    | RNR2 | 2,10E-02 | 1,90E-03 | 7,60E-02 | 2,00E-03 |
| 1949 | G      | A    | RNR2 | 1,30E-02 | 2,80E-03 | 7,60E-02 | 2,00E-03 |
| 1959 | C      | T    | RNR2 | 3,70E-02 | 1,10E-02 | 7,10E-02 | 1,90E-02 |
| 1971 | A      | G    | RNR2 | 2,60E-02 | 7,20E-03 | 7,20E-02 | 6,50E-03 |
| 1975 | T      | A    | RNR2 | 1,30E-01 | 3,20E-02 | 1,50E-01 | 3,30E-02 |
| 1977 | T      | C    | RNR2 | 9,50E-02 | 1,00E-01 | 6,10E-01 | 2,10E-02 |
| 1979 | TAGGTA | T    | RNR2 | 8,20E-02 | 2,10E-03 | 7,60E-02 | 9,30E-03 |
| 1986 | A      | T    | RNR2 | 4,60E-02 | 1,80E-02 | 1,10E-01 | 1,40E-02 |
| 1987 | G      | GCA  | RNR2 | 8,20E-02 | 2,10E-03 | 7,60E-02 | 9,30E-03 |
| 1989 | C      | CAGT | RNR2 | 8,20E-02 | 2,10E-03 | 7,60E-02 | 9,30E-03 |
| 1989 | C      | T    | RNR2 | 5,30E-02 | 1,60E-02 | 1,50E-01 | 1,30E-02 |
| 1992 | C      | T    | RNR2 | 4,20E-02 | 5,30E-03 | 1,20E-01 | 5,30E-03 |
| 1994 | AA     | CG   | RNR2 | 1,30E-01 | 5,30E-03 | 1,10E-01 | 1,90E-02 |

|      |      |      |      |          |          |          |          |
|------|------|------|------|----------|----------|----------|----------|
| 1995 | A    | G    | RNR2 | 8,10E-02 | 3,30E-02 | 2,00E-01 | 1,60E-02 |
| 1999 | A    | C    | RNR2 | 1,30E-01 | 5,30E-03 | 1,10E-01 | 1,90E-02 |
| 2001 | C    | T    | RNR2 | 1,30E-01 | 3,30E-02 | 1,50E-01 | 3,30E-02 |
| 2002 | G    | A    | RNR2 | 2,10E-01 | 3,20E-02 | 1,90E-01 | 6,50E-02 |
| 2008 | G    | A    | RNR2 | 1,30E-01 | 3,20E-02 | 1,50E-01 | 3,30E-02 |
| 2016 | CT   | C    | RNR2 | 1,30E-01 | 5,30E-03 | 1,10E-01 | 1,90E-02 |
| 2030 | T    | C    | RNR2 | 1,70E-01 | 2,40E-01 | 9,30E-01 | 4,90E-02 |
| 2053 | T    | C    | RNR2 | 1,80E-01 | 5,10E-02 | 2,00E-01 | 3,50E-02 |
| 2056 | G    | A    | RNR2 | 4,10E-02 | 6,30E-02 | 8,10E-01 | 9,70E-03 |
| 2059 | C    | T    | RNR2 | 1,00E-01 | 2,20E-01 | 9,20E-01 | 4,50E-02 |
| 2065 | ACCC | A    | RNR2 | 2,60E-01 | 3,60E-02 | 1,70E-01 | 1,10E-01 |
| 2071 | T    | C    | RNR2 | 1,70E-01 | 3,90E-02 | 3,10E-01 | 2,60E-02 |
| 2080 | T    | C    | RNR2 | 5,80E-02 | 1,00E-02 | 2,00E-01 | 5,50E-03 |
| 2162 | C    | T    | RNR2 | 1,30E-01 | 8,50E-02 | 8,10E-01 | 3,00E-02 |
| 2168 | T    | C    | RNR2 | 1,20E-01 | 7,30E-03 | 1,70E-01 | 1,30E-02 |
| 2218 | C    | CTGT | RNR2 | 2,60E-01 | 6,20E-02 | 3,20E-01 | 4,30E-02 |
| 2220 | AC   | A    | RNR2 | 2,60E-02 | 2,70E-02 | 5,70E-01 | 2,80E-03 |

|      |     |     |      |          |          |          |          |
|------|-----|-----|------|----------|----------|----------|----------|
| 2222 | TA  | T   | RNR2 | 7,40E-02 | 6,30E-02 | 7,50E-01 | 1,30E-02 |
| 2222 | TAC | T   | RNR2 | 1,80E-01 | 1,70E-02 | 2,00E-01 | 2,40E-02 |
| 2224 | C   | CGT | RNR2 | 7,40E-02 | 6,30E-02 | 7,60E-01 | 1,30E-02 |
| 2242 | T   | C   | RNR2 | 8,20E-02 | 5,60E-02 | 4,30E-01 | 1,20E-02 |
| 2244 | T   | C   | RNR2 | 7,40E-02 | 6,30E-02 | 7,60E-01 | 1,30E-02 |
| 2251 | A   | G   | RNR2 | 8,00E-02 | 4,30E-02 | 5,70E-01 | 1,10E-02 |
| 2257 | C   | T   | RNR2 | 7,80E-02 | 4,10E-02 | 5,60E-01 | 1,00E-02 |
| 2257 | CA  | TG  | RNR2 | 2,50E-01 | 5,90E-02 | 3,10E-01 | 4,20E-02 |
| 2262 | C   | T   | RNR2 | 1,40E-01 | 6,30E-02 | 6,20E-01 | 2,40E-02 |
| 2280 | C   | T   | RNR2 | 1,80E-02 | 1,60E-02 | 5,20E-01 | 1,80E-03 |
| 2284 | C   | T   | RNR2 | 8,20E-02 | 1,80E-01 | 9,40E-01 | 2,90E-02 |
| 2294 | A   | G   | RNR2 | 1,90E-01 | 2,00E-02 | 1,40E-01 | 8,00E-02 |
| 2343 | G   | A   | RNR2 | 1,40E-03 | 7,20E-01 | 2,00E-01 | 3,50E-02 |
| 2345 | G   | A   | RNR2 | 1,60E-03 | 6,90E-01 | 2,00E-01 | 3,40E-02 |
| 2351 | TT  | CC  | RNR2 | 1,30E-03 | 7,50E-01 | 2,00E-01 | 3,80E-02 |
| 2357 | C   | T   | RNR2 | 1,20E-03 | 6,50E-01 | 2,00E-01 | 2,90E-02 |
| 2359 | C   | T   | RNR2 | 9,50E-03 | 8,20E-01 | 2,10E-01 | 7,80E-02 |

|      |     |     |      |          |          |          |          |
|------|-----|-----|------|----------|----------|----------|----------|
| 2361 | G   | A   | RNR2 | 4,10E-03 | 9,30E-01 | 1,90E-01 | 1,10E-01 |
| 2404 | T   | C   | RNR2 | 9,50E-03 | 9,10E-01 | 2,00E-01 | 8,00E-02 |
| 2423 | C   | T   | RNR2 | 9,90E-03 | 9,30E-01 | 2,10E-01 | 7,40E-02 |
| 2442 | T   | C   | RNR2 | 2,00E-02 | 4,50E-01 | 5,60E-01 | 3,50E-02 |
| 2445 | T   | C   | RNR2 | 5,00E-02 | 6,10E-01 | 5,70E-01 | 6,50E-02 |
| 2523 | C   | T   | RNR2 | 3,40E-08 | 2,20E-02 | 6,00E-01 | 2,70E-06 |
| 2525 | C   | T   | RNR2 | 3,30E-04 | 3,90E-01 | 2,90E-01 | 9,60E-03 |
| 2541 | CG  | C   | RNR2 | 1,50E-04 | 3,30E-02 | 9,30E-01 | 1,30E-04 |
| 2541 | C   | T   | RNR2 | 1,30E-04 | 1,40E-03 | 2,70E-01 | 5,80E-06 |
| 2541 | CGC | TAT | RNR2 | 2,00E-01 | 1,30E-02 | 1,50E-01 | 3,50E-02 |
| 2546 | G   | GTC | RNR2 | 2,60E-01 | 4,20E-02 | 2,10E-01 | 4,90E-02 |
| 2550 | A   | G   | RNR2 | 3,70E-07 | 1,80E-01 | 2,20E-01 | 3,30E-04 |
| 2557 | C   | T   | RNR2 | 6,60E-10 | 1,70E-02 | 5,70E-01 | 2,70E-07 |
| 2560 | G   | A   | RNR2 | 2,60E-02 | 3,30E-04 | 4,00E-02 | 1,90E-03 |
| 2563 | T   | C   | RNR2 | 1,50E-06 | 1,50E-04 | 2,10E-01 | 8,10E-08 |
| 2566 | C   | T   | RNR2 | 1,70E-01 | 6,30E-02 | 5,80E-01 | 3,10E-02 |
| 2567 | G   | A   | RNR2 | 2,20E-03 | 6,00E-03 | 5,20E-01 | 2,00E-04 |



|      |     |    |      |          |          |          |          |
|------|-----|----|------|----------|----------|----------|----------|
| 2569 | CC  | TG | RNR2 | 2,60E-01 | 3,90E-02 | 2,00E-01 | 4,70E-02 |
| 2570 | C   | T  | RNR2 | 1,70E-03 | 9,60E-04 | 1,80E-01 | 6,20E-05 |
| 2571 | G   | A  | RNR2 | 8,00E-03 | 3,30E-02 | 8,20E-01 | 1,80E-03 |
| 2572 | C   | T  | RNR2 | 4,10E-03 | 1,90E-03 | 2,00E-01 | 1,30E-04 |
| 2573 | G   | A  | RNR2 | 1,50E-02 | 6,30E-02 | 9,60E-01 | 6,30E-03 |
| 2573 | G   | C  | RNR2 | 1,80E-01 | 5,10E-02 | 2,00E-01 | 3,50E-02 |
| 2577 | C   | T  | RNR2 | 1,30E-06 | 1,00E-04 | 2,00E-01 | 6,60E-08 |
| 2581 | A   | G  | RNR2 | 2,80E-07 | 1,90E-04 | 3,10E-01 | 6,60E-08 |
| 2588 | CA  | C  | RNR2 | 2,60E-01 | 3,90E-02 | 2,00E-01 | 4,70E-02 |
| 2589 | A   | G  | RNR2 | 2,60E-02 | 3,30E-04 | 4,00E-02 | 1,90E-03 |
| 2590 | A   | C  | RNR2 | 2,60E-01 | 4,20E-02 | 2,10E-01 | 4,90E-02 |
| 2612 | CT  | TC | RNR2 | 1,80E-01 | 1,80E-02 | 2,00E-01 | 2,50E-02 |
| 2613 | T   | C  | RNR2 | 3,10E-04 | 1,90E-04 | 1,90E-01 | 6,00E-06 |
| 2617 | A   | G  | RNR2 | 2,60E-01 | 3,30E-02 | 1,90E-01 | 7,10E-02 |
| 2625 | C   | T  | RNR2 | 4,40E-10 | 6,30E-02 | 2,90E-01 | 2,10E-06 |
| 2628 | T   | A  | RNR2 | 1,30E-01 | 5,30E-03 | 1,10E-01 | 1,90E-02 |
| 2636 | GCT | G  | RNR2 | 1,20E-01 | 1,60E-01 | 9,80E-01 | 3,70E-02 |

|      |     |    |      |          |          |          |          |
|------|-----|----|------|----------|----------|----------|----------|
| 2637 | C   | T  | RNR2 | 4,60E-02 | 9,80E-04 | 6,90E-02 | 4,10E-03 |
| 2638 | TC  | CA | RNR2 | 7,10E-02 | 6,00E-03 | 1,90E-01 | 8,10E-03 |
| 2639 | C   | A  | RNR2 | 4,60E-02 | 9,80E-04 | 6,90E-02 | 4,10E-03 |
| 2642 | C   | T  | RNR2 | 9,50E-03 | 2,90E-04 | 7,60E-02 | 3,50E-04 |
| 2643 | G   | A  | RNR2 | 1,10E-01 | 6,30E-02 | 6,90E-01 | 1,80E-02 |
| 2643 | G   | C  | RNR2 | 2,60E-01 | 3,30E-02 | 1,90E-01 | 7,10E-02 |
| 2645 | G   | A  | RNR2 | 1,80E-01 | 1,90E-02 | 2,00E-01 | 2,50E-02 |
| 2647 | G   | A  | RNR2 | 8,20E-02 | 2,10E-03 | 7,60E-02 | 9,30E-03 |
| 2655 | GTC | G  | RNR2 | 8,20E-02 | 2,10E-03 | 7,60E-02 | 9,30E-03 |
| 2666 | TT  | CC | RNR2 | 2,60E-01 | 4,10E-02 | 2,10E-01 | 4,80E-02 |
| 2667 | T   | C  | RNR2 | 4,40E-10 | 3,30E-02 | 5,40E-01 | 4,40E-07 |
| 2670 | C   | T  | RNR2 | 6,50E-02 | 1,60E-02 | 2,70E-01 | 6,40E-03 |
| 2679 | T   | C  | RNR2 | 3,40E-02 | 1,90E-02 | 2,90E-01 | 2,80E-03 |
| 2683 | C   | T  | RNR2 | 2,60E-01 | 3,30E-02 | 1,90E-01 | 7,10E-02 |
| 2686 | G   | A  | RNR2 | 2,70E-03 | 3,60E-01 | 5,60E-01 | 7,90E-03 |
| 2686 | GC  | AT | RNR2 | 1,10E-01 | 1,70E-02 | 2,00E-01 | 1,40E-02 |
| 2690 | G   | A  | RNR2 | 1,40E-01 | 6,30E-02 | 6,70E-01 | 2,50E-02 |

|      |     |        |      |          |          |          |          |
|------|-----|--------|------|----------|----------|----------|----------|
| 2697 | GG  | AA     | RNR2 | 1,30E-01 | 5,30E-03 | 1,10E-01 | 1,90E-02 |
| 2701 | GGC | G      | RNR2 | 1,60E-01 | 3,40E-02 | 2,90E-01 | 2,40E-02 |
| 2702 | GC  | AT     | RNR2 | 2,60E-01 | 3,30E-02 | 1,90E-01 | 7,10E-02 |
| 2705 | T   | TG     | RNR2 | 2,60E-01 | 4,00E-02 | 2,00E-01 | 4,70E-02 |
| 2706 | A   | G      | RNR2 | 2,40E-06 | 2,60E-01 | 3,10E-01 | 1,40E-03 |
| 2708 | C   | T      | RNR2 | 7,40E-02 | 1,00E-01 | 8,30E-01 | 2,00E-02 |
| 2709 | AC  | A      | RNR2 | 7,20E-02 | 8,60E-03 | 2,00E-01 | 7,40E-03 |
| 2710 | C   | T      | RNR2 | 4,70E-06 | 3,40E-01 | 2,20E-01 | 1,00E-03 |
| 2712 | GC  | AT     | RNR2 | 2,00E-01 | 5,70E-02 | 3,60E-01 | 3,50E-02 |
| 2714 | A   | AATAAG | RNR2 | 1,30E-01 | 5,30E-03 | 1,10E-01 | 1,90E-02 |
| 2717 | ACG | A      | RNR2 | 1,30E-01 | 5,30E-03 | 1,10E-01 | 1,90E-02 |
| 2718 | C   | T      | RNR2 | 1,80E-01 | 6,30E-02 | 5,70E-01 | 3,20E-02 |
| 2744 | T   | C      | RNR2 | 2,00E-01 | 4,00E-02 | 2,20E-01 | 4,30E-02 |
| 2778 | T   | C      | RNR2 | 1,60E-01 | 4,60E-02 | 2,10E-01 | 3,20E-02 |
| 2864 | TC  | AT     | RNR2 | 2,60E-01 | 3,30E-02 | 1,90E-01 | 7,10E-02 |
| 2868 | C   | A      | RNR2 | 2,00E-01 | 1,30E-02 | 1,50E-01 | 3,50E-02 |
| 2877 | C   | T      | RNR2 | 2,60E-01 | 3,30E-02 | 1,90E-01 | 7,10E-02 |

|      |     |     |      |          |          |          |          |
|------|-----|-----|------|----------|----------|----------|----------|
| 2881 | C   | T   | RNR2 | 1,80E-01 | 6,30E-02 | 5,60E-01 | 2,80E-02 |
| 2884 | CTA | C   | RNR2 | 1,50E-01 | 3,30E-02 | 2,90E-01 | 2,00E-02 |
| 2887 | T   | C   | RNR2 | 7,10E-02 | 7,40E-03 | 2,00E-01 | 5,60E-03 |
| 2889 | C   | CGT | RNR2 | 1,80E-01 | 6,30E-02 | 5,60E-01 | 2,90E-02 |
| 2891 | C   | T   | RNR2 | 1,80E-01 | 6,30E-02 | 5,60E-01 | 2,90E-02 |
| 2898 | T   | C   | RNR2 | 1,80E-01 | 3,30E-02 | 2,10E-01 | 2,40E-02 |
| 2911 | C   | T   | RNR2 | 2,60E-01 | 4,10E-02 | 2,10E-01 | 4,80E-02 |
| 2915 | C   | T   | RNR2 | 1,30E-01 | 5,30E-03 | 1,10E-01 | 1,90E-02 |
| 2920 | C   | T   | RNR2 | 2,00E-01 | 1,30E-02 | 1,50E-01 | 3,50E-02 |
| 2933 | G   | T   | RNR2 | 7,40E-02 | 3,10E-03 | 1,40E-01 | 6,40E-03 |
| 2942 | CG  | TA  | RNR2 | 7,20E-02 | 3,00E-03 | 1,40E-01 | 6,30E-03 |
| 2953 | T   | A   | RNR2 | 2,00E-01 | 1,30E-02 | 1,50E-01 | 3,50E-02 |
| 2958 | A   | G   | RNR2 | 4,10E-02 | 1,40E-03 | 1,10E-01 | 2,80E-03 |
| 2964 | T   | C   | RNR2 | 4,10E-02 | 1,40E-03 | 1,10E-01 | 2,80E-03 |
| 2968 | A   | G   | RNR2 | 5,60E-03 | 6,50E-04 | 1,60E-01 | 1,30E-04 |
| 2972 | A   | G   | RNR2 | 4,00E-02 | 1,40E-03 | 1,10E-01 | 2,80E-03 |
| 2976 | G   | A   | RNR2 | 1,30E-01 | 5,30E-03 | 1,10E-01 | 1,90E-02 |

|      |    |    |      |          |          |          |          |
|------|----|----|------|----------|----------|----------|----------|
| 2976 | GG | CA | RNR2 | 7,20E-02 | 3,00E-03 | 1,40E-01 | 6,30E-03 |
| 2980 | T  | A  | RNR2 | 7,40E-02 | 3,10E-03 | 1,40E-01 | 6,40E-03 |
| 2983 | G  | T  | RNR2 | 2,60E-01 | 3,30E-02 | 1,90E-01 | 7,10E-02 |
| 2983 | G  | A  | RNR2 | 1,20E-01 | 2,60E-02 | 1,90E-01 | 2,00E-02 |
| 2985 | C  | T  | RNR2 | 2,60E-01 | 4,20E-02 | 2,10E-01 | 4,90E-02 |
| 3009 | CG | TA | RNR2 | 3,60E-03 | 9,00E-04 | 1,90E-01 | 1,30E-04 |
| 3016 | G  | GT | RNR2 | 2,00E-01 | 1,30E-02 | 1,50E-01 | 3,50E-02 |
| 3017 | C  | T  | RNR2 | 1,20E-02 | 1,90E-03 | 1,90E-01 | 6,80E-04 |
| 3018 | AG | A  | RNR2 | 2,00E-01 | 1,30E-02 | 1,50E-01 | 3,50E-02 |
| 3029 | AA | GG | RNR2 | 2,60E-01 | 3,30E-02 | 1,90E-01 | 7,10E-02 |
| 3030 | A  | G  | RNR2 | 3,50E-02 | 7,10E-03 | 2,10E-01 | 2,10E-03 |
| 3035 | C  | T  | RNR2 | 1,20E-01 | 7,30E-03 | 1,70E-01 | 1,30E-02 |
| 3036 | G  | A  | RNR2 | 1,90E-01 | 3,30E-02 | 2,10E-01 | 2,50E-02 |
| 3046 | C  | T  | RNR2 | 2,50E-02 | 5,30E-03 | 2,00E-01 | 1,80E-03 |
| 3047 | G  | A  | RNR2 | 2,60E-01 | 3,30E-02 | 1,90E-01 | 7,10E-02 |
| 3060 | C  | T  | RNR2 | 8,40E-02 | 6,30E-03 | 1,60E-01 | 1,30E-02 |
| 3068 | G  | C  | RNR2 | 2,10E-01 | 3,30E-02 | 2,00E-01 | 4,70E-02 |

|      |     |    |       |          |          |          |          |
|------|-----|----|-------|----------|----------|----------|----------|
| 3079 | G   | A  | RNR2  | 1,30E-01 | 3,30E-02 | 3,10E-01 | 1,90E-02 |
| 3093 | C   | T  | RNR2  | 1,30E-01 | 5,30E-03 | 1,10E-01 | 1,90E-02 |
| 3104 | TAC | T  | RNR2  | 2,60E-01 | 3,30E-02 | 1,90E-01 | 7,10E-02 |
| 3170 | C   | T  | RNR2  | 2,60E-01 | 3,30E-02 | 1,90E-01 | 7,10E-02 |
| 3176 | A   | G  | RNR2  | 2,00E-01 | 2,80E-02 | 1,90E-01 | 6,10E-02 |
| 3250 | T   | C  | TRNL1 | 1,20E-01 | 3,30E-02 | 2,10E-01 | 1,80E-02 |
| 3253 | T   | C  | TRNL1 | 2,60E-01 | 3,30E-02 | 1,90E-01 | 7,10E-02 |
| 3254 | C   | T  | TRNL1 | 1,30E-01 | 2,70E-02 | 2,10E-01 | 1,90E-02 |
| 3263 | C   | T  | TRNL1 | 2,60E-01 | 4,20E-02 | 2,10E-01 | 4,90E-02 |
| 3275 | C   | T  | TRNL1 | 1,50E-01 | 1,30E-02 | 1,70E-01 | 3,50E-02 |
| 3277 | G   | A  | TRNL1 | 2,20E-01 | 3,30E-02 | 1,90E-01 | 6,60E-02 |
| 3290 | TT  | CC | TRNL1 | 2,60E-01 | 3,90E-02 | 2,00E-01 | 4,70E-02 |
| 3342 | C   | T  | ND1   | 1,80E-01 | 2,00E-02 | 2,00E-01 | 2,60E-02 |
| 3345 | T   | C  | ND1   | 1,30E-01 | 5,30E-03 | 1,10E-01 | 1,90E-02 |
| 3565 | A   | C  | ND1   | 2,00E-01 | 1,30E-02 | 1,50E-01 | 3,50E-02 |
| 3579 | A   | C  | ND1   | 2,60E-01 | 3,30E-02 | 1,90E-01 | 7,10E-02 |
| 3687 | C   | T  | ND1   | 2,60E-01 | 3,30E-02 | 1,90E-01 | 7,10E-02 |

|      |    |   |      |          |          |          |          |
|------|----|---|------|----------|----------|----------|----------|
| 3703 | C  | T | ND1  | 2,00E-01 | 1,30E-02 | 1,50E-01 | 3,50E-02 |
| 3954 | C  | T | ND1  | 2,00E-01 | 1,30E-02 | 1,50E-01 | 3,50E-02 |
| 4113 | G  | A | ND1  | 2,60E-01 | 3,30E-02 | 1,90E-01 | 7,10E-02 |
| 4498 | AC | A | ND2  | 2,60E-01 | 3,30E-02 | 1,90E-01 | 7,10E-02 |
| 4655 | G  | A | ND2  | 2,60E-01 | 3,30E-02 | 1,90E-01 | 7,10E-02 |
| 4847 | C  | T | ND2  | 4,00E-02 | 2,60E-01 | 1,50E-01 | 1,00E+00 |
| 4859 | T  | C | ND2  | 4,00E-02 | 2,60E-01 | 1,50E-01 | 1,00E+00 |
| 5262 | G  | A | ND2  | 2,60E-01 | 3,30E-02 | 1,90E-01 | 7,10E-02 |
| 5474 | A  | G | ND2  | 1,20E-01 | 2,10E-02 | 2,10E-01 | 1,30E-02 |
| 5648 | A  | G | TRNA | 2,60E-01 | 3,30E-02 | 1,90E-01 | 7,10E-02 |
| 5667 | G  | T | TRNN | 1,30E-01 | 5,30E-03 | 1,10E-01 | 1,90E-02 |
| 5681 | C  | T | TRNN | 1,30E-01 | 5,30E-03 | 1,10E-01 | 1,90E-02 |
| 5734 | T  | C | NA   | 2,60E-01 | 3,30E-02 | 1,90E-01 | 7,10E-02 |
| 5754 | GC | G | NA   | 2,60E-01 | 3,30E-02 | 1,90E-01 | 7,10E-02 |
| 5755 | CG | C | NA   | 2,60E-01 | 3,30E-02 | 1,90E-01 | 7,10E-02 |
| 5768 | G  | A | TRNC | 2,00E-01 | 1,30E-02 | 1,50E-01 | 3,50E-02 |
| 5774 | T  | A | TRNC | 1,40E-01 | 4,20E-02 | 4,00E-01 | 2,10E-02 |

|      |     |    |      |          |          |          |          |
|------|-----|----|------|----------|----------|----------|----------|
| 5781 | C   | G  | TRNC | 1,30E-01 | 5,30E-03 | 1,10E-01 | 1,90E-02 |
| 5790 | C   | T  | TRNC | 2,30E-01 | 6,30E-02 | 4,50E-01 | 4,60E-02 |
| 5806 | T   | C  | TRNC | 9,00E-02 | 5,30E-03 | 1,30E-01 | 1,90E-02 |
| 5810 | A   | AG | TRNC | 2,60E-01 | 3,30E-02 | 1,90E-01 | 7,10E-02 |
| 5821 | G   | A  | TRNC | 6,10E-02 | 8,00E-02 | 9,20E-01 | 1,80E-02 |
| 5840 | C   | T  | TRNY | 5,00E-02 | 2,10E-01 | 8,20E-01 | 2,80E-02 |
| 5840 | C   | CT | TRNY | 2,60E-01 | 4,10E-02 | 2,10E-01 | 4,80E-02 |
| 5842 | A   | G  | TRNY | 1,20E-01 | 7,20E-03 | 1,70E-01 | 1,30E-02 |
| 5846 | C   | T  | TRNY | 1,20E-01 | 7,60E-03 | 1,80E-01 | 1,30E-02 |
| 6176 | TA  | CG | COX1 | 2,60E-01 | 6,30E-02 | 3,30E-01 | 4,50E-02 |
| 6182 | G   | A  | COX1 | 4,30E-02 | 4,00E-03 | 1,90E-01 | 2,80E-03 |
| 6185 | T   | C  | COX1 | 6,20E-03 | 1,30E-04 | 4,00E-02 | 7,50E-04 |
| 6197 | C   | T  | COX1 | 1,20E-01 | 7,70E-03 | 1,80E-01 | 1,40E-02 |
| 6216 | T   | C  | COX1 | 2,60E-01 | 3,30E-02 | 1,90E-01 | 7,10E-02 |
| 6224 | C   | T  | COX1 | 2,60E-01 | 3,30E-02 | 1,90E-01 | 7,10E-02 |
| 6226 | CT  | C  | COX1 | 2,60E-01 | 4,20E-02 | 2,10E-01 | 4,90E-02 |
| 6229 | TCC | T  | COX1 | 2,60E-01 | 4,20E-02 | 2,10E-01 | 4,90E-02 |



|      |   |   |      |          |          |          |          |
|------|---|---|------|----------|----------|----------|----------|
| 6233 | A | C | COX1 | 2,30E-01 | 6,30E-02 | 5,40E-01 | 4,20E-02 |
| 6236 | C | T | COX1 | 1,30E-01 | 1,40E-02 | 2,00E-01 | 1,40E-02 |
| 6242 | C | T | COX1 | 3,80E-02 | 8,30E-03 | 2,10E-01 | 2,50E-03 |
| 6251 | T | C | COX1 | 7,20E-02 | 3,00E-03 | 1,40E-01 | 6,30E-03 |
| 6266 | A | C | COX1 | 9,90E-02 | 1,30E-01 | 9,50E-01 | 2,70E-02 |
| 6266 | A | T | COX1 | 1,80E-01 | 1,70E-02 | 2,00E-01 | 2,40E-02 |
| 6269 | A | C | COX1 | 1,80E-01 | 3,30E-02 | 2,10E-01 | 2,50E-02 |
| 6326 | C | T | COX1 | 2,00E-01 | 1,30E-02 | 1,50E-01 | 3,50E-02 |
| 6335 | C | T | COX1 | 2,00E-01 | 1,30E-02 | 1,50E-01 | 3,50E-02 |
| 6353 | A | G | COX1 | 2,00E-01 | 1,30E-02 | 1,50E-01 | 3,50E-02 |
| 6356 | C | T | COX1 | 1,80E-01 | 1,90E-02 | 2,00E-01 | 2,50E-02 |
| 6452 | C | T | COX1 | 1,20E-01 | 1,30E-02 | 2,00E-01 | 1,30E-02 |
| 6488 | T | C | COX1 | 2,00E-01 | 3,30E-02 | 2,00E-01 | 4,40E-02 |
| 6494 | A | C | COX1 | 1,40E-01 | 1,60E-02 | 1,90E-01 | 2,60E-02 |
| 6497 | T | C | COX1 | 9,50E-03 | 1,40E-03 | 1,10E-01 | 8,00E-04 |
| 6500 | C | T | COX1 | 2,00E-01 | 3,30E-02 | 2,00E-01 | 4,40E-02 |
| 6503 | A | C | COX1 | 2,60E-01 | 3,30E-02 | 1,90E-01 | 7,10E-02 |

|      |   |   |      |          |          |          |          |
|------|---|---|------|----------|----------|----------|----------|
| 6509 | A | G | COX1 | 2,00E-01 | 3,30E-02 | 2,00E-01 | 4,40E-02 |
| 6521 | C | T | COX1 | 3,10E-02 | 4,10E-03 | 1,40E-01 | 3,90E-03 |
| 6524 | T | C | COX1 | 8,30E-02 | 1,30E-02 | 1,40E-01 | 2,20E-02 |
| 6528 | C | T | COX1 | 1,40E-01 | 1,40E-02 | 1,90E-01 | 2,40E-02 |
| 6530 | A | C | COX1 | 2,60E-01 | 3,30E-02 | 1,90E-01 | 7,10E-02 |
| 6531 | C | T | COX1 | 1,70E-02 | 2,10E-03 | 1,10E-01 | 2,00E-03 |
| 6551 | C | T | COX1 | 3,20E-02 | 4,20E-03 | 1,40E-01 | 4,00E-03 |
| 6563 | C | T | COX1 | 7,30E-02 | 3,00E-03 | 7,10E-02 | 2,20E-02 |
| 6566 | C | T | COX1 | 2,60E-01 | 3,50E-02 | 1,70E-01 | 1,10E-01 |
| 6571 | C | T | COX1 | 2,60E-01 | 3,50E-02 | 1,70E-01 | 1,10E-01 |
| 6578 | A | G | COX1 | 2,60E-01 | 3,80E-02 | 2,00E-01 | 4,60E-02 |
| 6665 | C | T | COX1 | 2,60E-01 | 6,30E-02 | 3,20E-01 | 4,40E-02 |
| 6812 | A | C | COX1 | 1,60E-01 | 3,30E-02 | 2,90E-01 | 2,00E-02 |
| 6815 | T | C | COX1 | 1,40E-01 | 4,10E-02 | 3,70E-01 | 2,20E-02 |
| 6824 | C | T | COX1 | 1,70E-01 | 4,00E-02 | 3,30E-01 | 2,30E-02 |
| 6830 | C | T | COX1 | 1,70E-01 | 3,60E-02 | 2,90E-01 | 2,60E-02 |
| 6836 | C | T | COX1 | 1,70E-01 | 3,70E-02 | 3,00E-01 | 2,80E-02 |

|      |   |      |      |          |          |          |          |
|------|---|------|------|----------|----------|----------|----------|
| 6848 | C | T    | COX1 | 2,00E-01 | 2,60E-02 | 1,90E-01 | 5,70E-02 |
| 6851 | C | T    | COX1 | 1,40E-01 | 2,10E-02 | 2,00E-01 | 2,10E-02 |
| 6860 | A | G    | COX1 | 1,30E-01 | 1,20E-02 | 1,50E-01 | 3,10E-02 |
| 6863 | A | C    | COX1 | 1,30E-01 | 1,20E-02 | 1,50E-01 | 3,10E-02 |
| 6873 | C | T    | COX1 | 1,20E-01 | 7,30E-03 | 1,70E-01 | 1,30E-02 |
| 6875 | C | A    | COX1 | 1,20E-01 | 8,10E-03 | 1,90E-01 | 1,40E-02 |
| 6878 | C | T    | COX1 | 1,50E-02 | 3,30E-02 | 7,10E-01 | 2,30E-03 |
| 6881 | A | C    | COX1 | 2,60E-01 | 4,00E-02 | 2,00E-01 | 4,70E-02 |
| 6884 | C | G    | COX1 | 1,20E-01 | 1,30E-02 | 2,00E-01 | 1,30E-02 |
| 6886 | A | ACGG | COX1 | 2,60E-01 | 6,20E-02 | 3,20E-01 | 4,30E-02 |
| 6899 | G | C    | COX1 | 2,60E-01 | 6,30E-02 | 3,30E-01 | 4,50E-02 |
| 6902 | A | G    | COX1 | 2,00E-02 | 1,20E-02 | 3,70E-01 | 1,70E-03 |
| 6909 | G | T    | COX1 | 2,60E-01 | 3,80E-02 | 2,00E-01 | 4,60E-02 |
| 6915 | G | A    | COX1 | 2,60E-01 | 4,20E-02 | 2,10E-01 | 4,90E-02 |
| 6929 | A | G    | COX1 | 1,30E-01 | 1,10E-01 | 7,80E-01 | 3,20E-02 |
| 6932 | A | G    | COX1 | 3,20E-02 | 3,30E-03 | 2,00E-01 | 1,80E-03 |
| 6935 | C | T    | COX1 | 7,40E-02 | 1,40E-02 | 2,30E-01 | 6,40E-03 |

|      |   |   |      |          |          |          |          |
|------|---|---|------|----------|----------|----------|----------|
| 6938 | C | T | COX1 | 4,70E-05 | 3,80E-04 | 2,00E-01 | 1,80E-06 |
| 6944 | T | C | COX1 | 6,20E-03 | 5,30E-03 | 2,20E-01 | 3,70E-04 |
| 6950 | C | T | COX1 | 1,70E-02 | 1,30E-02 | 3,10E-01 | 1,70E-03 |
| 6962 | G | A | COX1 | 5,50E-04 | 3,00E-03 | 4,60E-01 | 4,00E-05 |
| 6965 | T | C | COX1 | 9,50E-03 | 3,30E-02 | 8,20E-01 | 1,80E-03 |
| 6975 | T | C | COX1 | 9,70E-02 | 2,40E-02 | 3,00E-01 | 1,00E-02 |
| 6990 | C | T | COX1 | 1,20E-01 | 8,10E-03 | 1,90E-01 | 1,40E-02 |
| 7007 | C | T | COX1 | 2,60E-01 | 6,30E-02 | 3,60E-01 | 4,80E-02 |
| 7008 | G | T | COX1 | 4,60E-02 | 9,80E-04 | 6,90E-02 | 4,10E-03 |
| 7013 | G | A | COX1 | 2,50E-03 | 1,90E-03 | 2,10E-01 | 8,70E-05 |
| 7016 | C | T | COX1 | 2,60E-01 | 3,60E-02 | 2,00E-01 | 4,50E-02 |
| 7022 | T | C | COX1 | 2,60E-02 | 7,70E-03 | 2,50E-01 | 1,80E-03 |
| 7037 | C | T | COX1 | 1,80E-01 | 3,10E-02 | 2,10E-01 | 2,30E-02 |
| 7040 | T | C | COX1 | 3,30E-03 | 3,80E-04 | 1,50E-01 | 1,20E-04 |
| 7064 | T | C | COX1 | 4,20E-02 | 1,30E-02 | 2,50E-01 | 3,90E-03 |
| 7072 | T | C | COX1 | 1,30E-01 | 5,30E-03 | 1,10E-01 | 1,90E-02 |
| 7076 | A | G | COX1 | 1,50E-01 | 5,70E-02 | 4,70E-01 | 2,50E-02 |

|      |    |    |      |          |          |          |          |
|------|----|----|------|----------|----------|----------|----------|
| 7094 | T  | C  | COX1 | 2,60E-01 | 6,30E-02 | 3,70E-01 | 4,90E-02 |
| 7112 | C  | T  | COX1 | 2,60E-01 | 6,30E-02 | 3,30E-01 | 4,50E-02 |
| 7133 | CA | C  | COX1 | 2,00E-01 | 1,30E-02 | 1,50E-01 | 3,50E-02 |
| 7196 | C  | T  | COX1 | 1,80E-01 | 6,30E-02 | 5,40E-01 | 3,40E-02 |
| 7205 | C  | T  | COX1 | 1,90E-01 | 9,70E-02 | 5,60E-01 | 4,00E-02 |
| 7211 | G  | A  | COX1 | 1,90E-01 | 6,30E-02 | 5,60E-01 | 3,50E-02 |
| 7244 | C  | T  | COX1 | 2,60E-01 | 3,30E-02 | 1,90E-01 | 7,10E-02 |
| 7259 | CC | TT | COX1 | 2,60E-01 | 3,30E-02 | 1,90E-01 | 7,10E-02 |
| 7424 | A  | G  | COX1 | 4,10E-02 | 2,30E-01 | 8,60E-01 | 4,40E-02 |
| 7621 | T  | C  | COX2 | 2,60E-01 | 3,30E-02 | 1,90E-01 | 7,10E-02 |
| 7861 | T  | C  | COX2 | 2,60E-01 | 3,30E-02 | 1,90E-01 | 7,10E-02 |
| 7868 | C  | T  | COX2 | 1,20E-01 | 2,10E-02 | 2,10E-01 | 1,30E-02 |
| 8011 | A  | G  | COX2 | 2,60E-01 | 3,30E-02 | 1,90E-01 | 7,10E-02 |
| 8021 | A  | G  | COX2 | 1,50E-01 | 3,30E-02 | 2,70E-01 | 1,90E-02 |
| 8065 | G  | A  | COX2 | 1,20E-01 | 3,40E-02 | 2,10E-01 | 1,50E-02 |
| 8140 | C  | T  | COX2 | 2,20E-01 | 6,30E-02 | 5,00E-01 | 3,90E-02 |
| 8152 | G  | A  | COX2 | 9,90E-02 | 1,30E-01 | 9,60E-01 | 2,80E-02 |

|      |   |   |      |          |          |          |          |
|------|---|---|------|----------|----------|----------|----------|
| 8167 | T | C | COX2 | 1,30E-01 | 2,60E-02 | 2,40E-01 | 1,40E-02 |
| 8371 | C | A | ATP8 | 1,60E-01 | 3,30E-02 | 3,00E-01 | 2,00E-02 |
| 8374 | A | G | ATP8 | 1,80E-01 | 6,30E-02 | 5,60E-01 | 2,90E-02 |
| 8380 | T | C | ATP8 | 1,50E-01 | 3,30E-02 | 2,90E-01 | 2,00E-02 |
| 8383 | T | C | ATP8 | 1,60E-01 | 3,30E-02 | 2,90E-01 | 2,00E-02 |
| 8386 | C | T | ATP8 | 1,60E-01 | 3,30E-02 | 2,90E-01 | 2,00E-02 |
| 8401 | A | C | ATP8 | 1,20E-01 | 1,30E-02 | 2,00E-01 | 1,30E-02 |
| 8405 | A | G | ATP8 | 3,40E-08 | 1,90E-03 | 8,10E-01 | 6,60E-08 |
| 8410 | C | A | ATP8 | 1,80E-01 | 3,30E-02 | 2,10E-01 | 2,40E-02 |
| 8416 | C | T | ATP8 | 1,20E-07 | 1,20E-03 | 5,80E-01 | 7,10E-08 |
| 8419 | T | C | ATP8 | 1,20E-01 | 1,30E-02 | 2,00E-01 | 1,30E-02 |
| 8428 | C | T | ATP8 | 2,40E-01 | 3,60E-02 | 2,00E-01 | 5,70E-02 |
| 8437 | C | T | ATP8 | 7,60E-08 | 1,40E-03 | 6,90E-01 | 6,70E-08 |
| 8440 | A | G | ATP8 | 5,50E-07 | 2,10E-03 | 8,10E-01 | 4,50E-07 |
| 8455 | C | T | ATP8 | 6,00E-08 | 1,40E-03 | 7,80E-01 | 8,80E-08 |
| 8461 | C | T | ATP8 | 1,40E-07 | 3,60E-04 | 4,60E-01 | 6,60E-08 |
| 8467 | C | T | ATP8 | 8,50E-06 | 3,80E-04 | 2,90E-01 | 1,10E-06 |

|      |    |    |           |          |          |          |          |
|------|----|----|-----------|----------|----------|----------|----------|
| 8473 | T  | C  | ATP8      | 7,90E-03 | 9,50E-03 | 4,30E-01 | 1,70E-03 |
| 8503 | T  | C  | ATP8      | 1,00E-01 | 1,70E-01 | 9,50E-01 | 3,60E-02 |
| 8508 | AC | GT | ATP8      | 5,30E-02 | 8,30E-02 | 8,40E-01 | 1,70E-02 |
| 8527 | A  | G  | ATP8,ATP6 | 7,10E-02 | 2,50E-01 | 8,70E-01 | 3,50E-02 |
| 8558 | C  | G  | ATP8,ATP6 | 2,60E-02 | 3,30E-04 | 4,00E-02 | 1,90E-03 |
| 8566 | A  | G  | ATP8,ATP6 | 1,10E-01 | 3,30E-02 | 3,30E-01 | 1,40E-02 |
| 8568 | C  | T  | ATP8,ATP6 | 1,20E-01 | 1,30E-02 | 2,00E-01 | 1,30E-02 |
| 8574 | C  | T  | ATP6      | 9,90E-03 | 1,80E-01 | 6,80E-01 | 1,30E-02 |
| 8577 | A  | G  | ATP6      | 9,90E-03 | 1,80E-01 | 6,80E-01 | 1,30E-02 |
| 8611 | C  | T  | ATP6      | 2,20E-01 | 3,60E-02 | 2,00E-01 | 4,90E-02 |
| 8618 | T  | C  | ATP6      | 8,30E-02 | 1,10E-01 | 8,10E-01 | 4,50E-02 |
| 8632 | T  | C  | ATP6      | 1,60E-01 | 1,90E-02 | 2,00E-01 | 2,80E-02 |
| 8634 | T  | C  | ATP6      | 1,00E-04 | 1,20E-01 | 5,80E-01 | 8,30E-04 |
| 8655 | C  | T  | ATP6      | 1,40E-02 | 6,30E-02 | 9,20E-01 | 5,80E-03 |
| 8658 | C  | T  | ATP6      | 2,60E-01 | 3,60E-02 | 2,00E-01 | 4,50E-02 |
| 8677 | A  | C  | ATP6      | 1,20E-03 | 6,30E-02 | 1,00E+00 | 1,10E-03 |
| 8714 | C  | T  | ATP6      | 2,60E-01 | 3,30E-02 | 1,90E-01 | 7,10E-02 |

|      |   |               |      |          |          |          |          |
|------|---|---------------|------|----------|----------|----------|----------|
| 8721 | A | G             | ATP6 | 2,70E-02 | 1,20E-01 | 8,70E-01 | 9,30E-03 |
| 8775 | C | T             | ATP6 | 2,30E-03 | 1,00E-02 | 3,60E-01 | 3,10E-04 |
| 8778 | C | T             | ATP6 | 7,20E-03 | 1,30E-02 | 3,10E-01 | 8,80E-04 |
| 8784 | A | G             | ATP6 | 2,90E-03 | 9,90E-03 | 2,50E-01 | 3,10E-04 |
| 8789 | T | TAC-          | ATP6 | 1,20E-01 | 8,10E-03 | 1,90E-01 | 1,40E-02 |
|      |   | GCCGAGGCCGCCG |      |          |          |          |          |
|      |   | CCGCCGCCGCC   |      |          |          |          |          |
| 8793 | T | G             | ATP6 | 2,60E-01 | 3,90E-02 | 2,00E-01 | 4,60E-02 |
| 8795 | A | C             | ATP6 | 2,00E-01 | 1,30E-02 | 1,50E-01 | 3,50E-02 |
| 8848 | T | C             | ATP6 | 4,00E-02 | 2,50E-02 | 2,00E-01 | 4,10E-03 |
| 8850 | A | G             | ATP6 | 4,00E-02 | 2,50E-02 | 2,00E-01 | 4,10E-03 |
| 8854 | G | A             | ATP6 | 5,40E-02 | 5,00E-02 | 3,20E-01 | 7,20E-03 |
| 8856 | G | A             | ATP6 | 1,20E-02 | 5,30E-03 | 1,70E-01 | 9,50E-04 |
| 8859 | C | T             | ATP6 | 4,60E-02 | 3,90E-02 | 2,70E-01 | 6,00E-03 |
| 8860 | A | G             | ATP6 | 7,90E-02 | 5,20E-02 | 2,30E-01 | 1,10E-02 |
| 8865 | G | A             | ATP6 | 1,60E-02 | 1,20E-02 | 2,00E-01 | 1,50E-03 |
| 8870 | T | C             | ATP6 | 1,80E-02 | 1,30E-02 | 2,00E-01 | 1,60E-03 |



|      |    |    |      |          |          |          |          |
|------|----|----|------|----------|----------|----------|----------|
| 8875 | T  | C  | ATP6 | 7,80E-02 | 6,30E-02 | 4,10E-01 | 1,30E-02 |
| 8877 | T  | C  | ATP6 | 2,60E-01 | 3,30E-02 | 1,90E-01 | 7,10E-02 |
| 8886 | G  | A  | ATP6 | 1,00E-01 | 7,70E-02 | 5,00E-01 | 1,80E-02 |
| 8888 | TT | CC | ATP6 | 1,00E-01 | 7,40E-02 | 5,00E-01 | 1,80E-02 |
| 9261 | A  | C  | COX3 | 2,60E-01 | 3,30E-02 | 1,90E-01 | 7,10E-02 |
| 9325 | T  | C  | COX3 | 1,60E-02 | 1,00E-01 | 8,60E-01 | 9,30E-03 |
| 9329 | G  | C  | COX3 | 3,30E-02 | 1,80E-01 | 8,10E-01 | 2,00E-02 |
| 9527 | C  | T  | COX3 | 9,50E-02 | 2,30E-02 | 2,90E-01 | 9,80E-03 |
| 9530 | T  | C  | COX3 | 7,00E-02 | 9,50E-02 | 9,40E-01 | 1,90E-02 |
| 9692 | AC | GT | COX3 | 2,60E-01 | 3,90E-02 | 1,80E-01 | 1,10E-01 |
| 9695 | G  | A  | COX3 | 2,60E-01 | 4,20E-02 | 2,10E-01 | 4,90E-02 |
| 9713 | G  | A  | COX3 | 2,60E-01 | 3,30E-02 | 1,90E-01 | 7,10E-02 |
| 9717 | C  | G  | COX3 | 2,60E-01 | 3,30E-02 | 1,90E-01 | 7,10E-02 |
| 9719 | C  | T  | COX3 | 2,60E-01 | 3,30E-02 | 1,90E-01 | 7,10E-02 |
| 9722 | T  | C  | COX3 | 2,60E-01 | 3,30E-02 | 1,90E-01 | 7,10E-02 |
| 9785 | C  | T  | COX3 | 2,00E-01 | 1,30E-02 | 1,50E-01 | 3,50E-02 |
| 9839 | C  | A  | COX3 | 1,80E-01 | 1,70E-02 | 2,00E-01 | 2,40E-02 |

|       |    |    |      |          |          |          |          |
|-------|----|----|------|----------|----------|----------|----------|
| 9857  | C  | T  | COX3 | 2,00E-01 | 1,30E-02 | 1,50E-01 | 3,50E-02 |
| 9861  | T  | C  | COX3 | 2,60E-02 | 3,30E-04 | 4,00E-02 | 1,90E-03 |
| 9877  | T  | A  | COX3 | 2,60E-01 | 3,30E-02 | 1,90E-01 | 7,10E-02 |
| 9880  | T  | A  | COX3 | 2,60E-01 | 3,30E-02 | 1,90E-01 | 7,10E-02 |
| 9893  | C  | T  | COX3 | 2,60E-01 | 4,20E-02 | 2,10E-01 | 4,90E-02 |
| 9896  | A  | C  | COX3 | 2,00E-01 | 1,30E-02 | 1,50E-01 | 3,50E-02 |
| 9911  | CG | TA | COX3 | 2,00E-01 | 1,30E-02 | 1,50E-01 | 3,50E-02 |
| 9924  | T  | G  | COX3 | 2,60E-01 | 3,30E-02 | 1,90E-01 | 7,10E-02 |
| 9929  | C  | T  | COX3 | 2,60E-01 | 3,30E-02 | 1,90E-01 | 7,10E-02 |
| 10308 | C  | T  | ND3  | 2,60E-01 | 3,30E-02 | 1,90E-01 | 7,10E-02 |
| 10310 | G  | A  | ND3  | 2,60E-01 | 3,30E-02 | 1,90E-01 | 7,10E-02 |
| 10377 | C  | T  | ND3  | 1,10E-01 | 1,30E-02 | 1,70E-01 | 3,50E-02 |
| 10380 | C  | T  | ND3  | 7,00E-02 | 5,90E-03 | 1,40E-01 | 2,20E-02 |
| 10388 | A  | G  | ND3  | 7,00E-02 | 5,90E-03 | 1,40E-01 | 2,10E-02 |
| 10417 | T  | C  | TRNR | 1,10E-01 | 1,70E-02 | 2,10E-01 | 1,20E-02 |
| 10589 | G  | A  | ND4L | 6,50E-02 | 1,70E-02 | 1,20E-01 | 2,00E-02 |
| 10646 | G  | A  | ND4L | 1,20E-01 | 6,30E-02 | 2,10E-01 | 2,10E-02 |

|       |    |    |      |          |          |          |          |
|-------|----|----|------|----------|----------|----------|----------|
| 10652 | TG | CA | ND4L | 1,80E-01 | 1,10E-01 | 5,80E-01 | 3,60E-02 |
| 10667 | T  | C  | ND4L | 2,60E-01 | 3,30E-02 | 1,90E-01 | 7,10E-02 |
| 10670 | C  | T  | ND4L | 5,30E-02 | 4,10E-02 | 3,10E-01 | 7,40E-03 |
| 10677 | G  | A  | ND4L | 7,70E-02 | 3,30E-02 | 2,60E-01 | 1,10E-02 |
| 10679 | A  | G  | ND4L | 3,40E-02 | 1,40E-02 | 2,10E-01 | 3,20E-03 |
| 10685 | G  | A  | ND4L | 4,00E-02 | 3,30E-02 | 3,70E-01 | 4,80E-03 |
| 10750 | A  | G  | ND4L | 1,80E-01 | 3,20E-02 | 2,10E-01 | 2,40E-02 |
| 10775 | G  | A  | ND4  | 2,60E-01 | 3,50E-02 | 2,00E-01 | 4,40E-02 |
| 10786 | T  | C  | ND4  | 4,60E-02 | 2,80E-03 | 1,50E-01 | 3,10E-03 |
| 10801 | G  | A  | ND4  | 4,20E-02 | 2,20E-03 | 1,50E-01 | 2,80E-03 |
| 10808 | C  | T  | ND4  | 7,10E-02 | 7,30E-03 | 2,00E-01 | 5,50E-03 |
| 10810 | T  | C  | ND4  | 1,80E-01 | 3,60E-02 | 1,70E-01 | 1,10E-01 |
| 10816 | A  | G  | ND4  | 2,00E-01 | 1,30E-02 | 1,50E-01 | 3,50E-02 |
| 10846 | C  | T  | ND4  | 1,50E-01 | 3,30E-02 | 2,00E-01 | 3,30E-02 |
| 10866 | T  | C  | ND4  | 1,90E-01 | 6,30E-02 | 2,30E-01 | 4,00E-02 |
| 10972 | A  | C  | ND4  | 1,10E-01 | 6,60E-03 | 1,70E-01 | 1,30E-02 |
| 10978 | A  | C  | ND4  | 4,00E-02 | 2,60E-01 | 1,50E-01 | 1,00E+00 |

|       |    |    |     |          |          |          |          |
|-------|----|----|-----|----------|----------|----------|----------|
| 11107 | C  | T  | ND4 | 2,00E-01 | 1,30E-02 | 1,50E-01 | 3,50E-02 |
| 11113 | T  | C  | ND4 | 2,60E-01 | 3,30E-02 | 1,90E-01 | 7,10E-02 |
| 11116 | T  | C  | ND4 | 2,60E-01 | 3,30E-02 | 1,90E-01 | 7,10E-02 |
| 11129 | A  | G  | ND4 | 7,50E-02 | 1,30E-02 | 1,90E-01 | 8,80E-03 |
| 11134 | A  | G  | ND4 | 2,50E-01 | 5,90E-02 | 3,10E-01 | 4,20E-02 |
| 11137 | TA | AG | ND4 | 2,50E-01 | 5,90E-02 | 3,10E-01 | 4,20E-02 |
| 11710 | C  | T  | ND4 | 1,70E-01 | 2,10E-02 | 2,00E-01 | 3,10E-02 |
| 11719 | G  | A  | ND4 | 6,90E-02 | 4,20E-02 | 2,10E-01 | 2,80E-02 |
| 11731 | A  | C  | ND4 | 1,90E-01 | 4,70E-02 | 3,30E-01 | 3,30E-02 |
| 11767 | C  | T  | ND4 | 1,00E-01 | 6,30E-02 | 3,40E-01 | 1,60E-02 |
| 11770 | T  | C  | ND4 | 1,10E-02 | 3,00E-03 | 1,40E-01 | 1,10E-03 |
| 11788 | C  | T  | ND4 | 2,10E-02 | 7,10E-03 | 1,70E-01 | 2,50E-03 |
| 11887 | G  | A  | ND4 | 1,80E-01 | 1,70E-02 | 2,00E-01 | 2,40E-02 |
| 11953 | C  | T  | ND4 | 2,60E-01 | 3,30E-02 | 1,90E-01 | 7,10E-02 |
| 11963 | G  | A  | ND4 | 2,60E-01 | 6,30E-02 | 3,20E-01 | 4,40E-02 |
| 12064 | C  | T  | ND4 | 1,20E-01 | 7,30E-03 | 1,70E-01 | 1,30E-02 |
| 12088 | C  | T  | ND4 | 8,20E-02 | 2,10E-03 | 7,60E-02 | 9,30E-03 |

|       |   |   |       |          |          |          |          |
|-------|---|---|-------|----------|----------|----------|----------|
| 12091 | T | C | ND4   | 7,50E-02 | 3,30E-03 | 1,50E-01 | 6,70E-03 |
| 12115 | C | T | ND4   | 7,90E-02 | 5,90E-03 | 1,90E-01 | 6,70E-03 |
| 12136 | T | C | ND4   | 1,80E-01 | 3,30E-02 | 2,10E-01 | 2,40E-02 |
| 12218 | C | T | TRNS2 | 6,10E-02 | 1,80E-01 | 1,00E+00 | 2,10E-02 |
| 12341 | C | A | ND5   | 2,60E-01 | 3,30E-02 | 1,90E-01 | 7,10E-02 |
| 12346 | C | T | ND5   | 1,80E-01 | 3,30E-02 | 2,10E-01 | 3,20E-02 |
| 12360 | C | A | ND5   | 2,60E-01 | 3,30E-02 | 1,90E-01 | 7,10E-02 |
| 12368 | C | T | ND5   | 2,60E-01 | 3,30E-02 | 1,90E-01 | 7,10E-02 |
| 12390 | C | T | ND5   | 2,00E-01 | 1,30E-02 | 1,50E-01 | 3,50E-02 |
| 12403 | C | T | ND5   | 2,60E-01 | 3,30E-02 | 1,90E-01 | 7,10E-02 |
| 12684 | G | A | ND5   | 7,40E-02 | 2,50E-02 | 3,60E-01 | 7,40E-03 |
| 12687 | C | T | ND5   | 8,30E-02 | 6,90E-03 | 1,90E-01 | 7,40E-03 |
| 12702 | C | T | ND5   | 1,90E-01 | 3,30E-02 | 2,10E-01 | 2,60E-02 |
| 12714 | T | C | ND5   | 1,70E-01 | 3,60E-02 | 3,20E-01 | 2,10E-02 |
| 12750 | C | T | ND5   | 2,60E-01 | 3,30E-02 | 1,90E-01 | 7,10E-02 |
| 12786 | A | G | ND5   | 2,00E-01 | 1,30E-02 | 1,50E-01 | 3,50E-02 |
| 12789 | C | T | ND5   | 2,00E-01 | 1,30E-02 | 1,50E-01 | 3,50E-02 |

|       |   |   |     |          |          |          |          |
|-------|---|---|-----|----------|----------|----------|----------|
| 12793 | T | C | ND5 | 2,60E-01 | 3,30E-02 | 1,90E-01 | 7,10E-02 |
| 12802 | A | G | ND5 | 2,60E-01 | 3,30E-02 | 1,90E-01 | 7,10E-02 |
| 12825 | T | C | ND5 | 2,60E-01 | 3,30E-02 | 1,90E-01 | 7,10E-02 |
| 12873 | T | C | ND5 | 2,30E-01 | 6,30E-02 | 5,20E-01 | 4,00E-02 |
| 12879 | T | C | ND5 | 7,10E-02 | 3,00E-03 | 1,40E-01 | 6,20E-03 |
| 12892 | T | C | ND5 | 2,20E-01 | 6,30E-02 | 5,10E-01 | 3,90E-02 |
| 13020 | T | C | ND5 | 1,30E-01 | 1,30E-02 | 2,00E-01 | 1,40E-02 |
| 13034 | T | C | ND5 | 2,60E-01 | 3,30E-02 | 1,90E-01 | 7,10E-02 |
| 13062 | A | G | ND5 | 1,80E-01 | 4,20E-02 | 3,50E-01 | 2,40E-02 |
| 13095 | T | C | ND5 | 1,70E-01 | 3,60E-02 | 3,20E-01 | 2,20E-02 |
| 13118 | T | A | ND5 | 2,60E-01 | 3,30E-02 | 1,90E-01 | 7,10E-02 |
| 13132 | C | T | ND5 | 2,60E-01 | 3,30E-02 | 1,90E-01 | 7,10E-02 |
| 13145 | G | A | ND5 | 4,00E-02 | 5,00E-01 | 4,20E-01 | 7,20E-02 |
| 13164 | A | C | ND5 | 5,70E-03 | 4,50E-01 | 1,10E-01 | 4,00E-01 |
| 13191 | T | C | ND5 | 2,20E-01 | 6,30E-02 | 4,90E-01 | 3,80E-02 |
| 13197 | C | T | ND5 | 2,60E-01 | 3,30E-02 | 1,90E-01 | 7,10E-02 |
| 13215 | T | C | ND5 | 2,60E-01 | 6,30E-02 | 3,70E-01 | 4,90E-02 |

|       |    |    |     |          |          |          |          |
|-------|----|----|-----|----------|----------|----------|----------|
| 13226 | A  | C  | ND5 | 2,60E-01 | 3,30E-02 | 1,90E-01 | 7,10E-02 |
| 13227 | C  | T  | ND5 | 1,30E-01 | 1,60E-02 | 2,00E-01 | 1,50E-02 |
| 13242 | A  | G  | ND5 | 4,60E-02 | 2,20E-01 | 8,10E-01 | 3,00E-02 |
| 13251 | C  | T  | ND5 | 1,40E-01 | 5,00E-02 | 2,50E-01 | 2,40E-02 |
| 13260 | T  | C  | ND5 | 8,00E-03 | 6,30E-02 | 9,90E-01 | 3,50E-03 |
| 13264 | C  | T  | ND5 | 1,00E-01 | 3,30E-02 | 2,10E-01 | 1,50E-02 |
| 13272 | C  | T  | ND5 | 4,60E-02 | 1,80E-01 | 8,50E-01 | 2,40E-02 |
| 13275 | AA | GG | ND5 | 1,50E-01 | 3,30E-02 | 1,90E-01 | 4,30E-02 |
| 13281 | T  | C  | ND5 | 7,30E-03 | 2,00E-02 | 5,60E-01 | 9,70E-04 |
| 13303 | C  | T  | ND5 | 1,80E-01 | 1,30E-01 | 8,30E-01 | 4,40E-02 |
| 13359 | G  | A  | ND5 | 2,50E-02 | 2,00E-01 | 1,00E+00 | 1,30E-02 |
| 13386 | T  | C  | ND5 | 6,10E-02 | 3,00E-01 | 1,00E+00 | 2,50E-02 |
| 13466 | G  | A  | ND5 | 1,10E-01 | 8,30E-02 | 8,30E-01 | 2,50E-02 |
| 13474 | T  | C  | ND5 | 8,00E-02 | 6,30E-02 | 5,60E-01 | 1,30E-02 |
| 13476 | A  | T  | ND5 | 9,00E-02 | 1,90E-02 | 2,00E-01 | 1,40E-02 |
| 13476 | A  | G  | ND5 | 6,10E-02 | 5,80E-02 | 7,10E-01 | 9,60E-03 |
| 13488 | T  | C  | ND5 | 4,10E-03 | 1,90E-03 | 2,00E-01 | 2,20E-04 |

|       |   |    |     |          |          |          |          |
|-------|---|----|-----|----------|----------|----------|----------|
| 13517 | A | T  | ND5 | 1,80E-01 | 1,40E-01 | 7,00E-01 | 4,20E-02 |
| 13548 | A | C  | ND5 | 1,10E-01 | 8,90E-02 | 7,00E-01 | 2,00E-02 |
| 13581 | T | C  | ND5 | 9,50E-03 | 5,30E-02 | 8,20E-01 | 1,90E-03 |
| 13584 | C | T  | ND5 | 4,00E-02 | 5,80E-03 | 1,50E-01 | 3,90E-03 |
| 13600 | T | A  | ND5 | 1,00E-01 | 3,30E-02 | 2,10E-01 | 1,30E-02 |
| 13614 | A | T  | ND5 | 2,60E-01 | 3,30E-02 | 1,90E-01 | 7,10E-02 |
| 13618 | C | T  | ND5 | 2,60E-01 | 3,30E-02 | 1,90E-01 | 7,10E-02 |
| 13627 | C | T  | ND5 | 2,00E-01 | 1,30E-02 | 1,50E-01 | 3,50E-02 |
| 13635 | T | C  | ND5 | 1,60E-01 | 6,20E-02 | 2,70E-01 | 2,80E-02 |
| 13635 | T | A  | ND5 | 2,60E-01 | 3,30E-02 | 1,90E-01 | 7,10E-02 |
| 13636 | C | CA | ND5 | 2,60E-01 | 3,30E-02 | 1,90E-01 | 7,10E-02 |
| 13650 | C | A  | ND5 | 1,80E-01 | 1,50E-01 | 7,70E-01 | 3,90E-02 |
| 13651 | A | G  | ND5 | 2,60E-01 | 3,30E-02 | 1,90E-01 | 7,10E-02 |
| 13674 | T | C  | ND5 | 7,10E-02 | 7,30E-02 | 8,80E-01 | 1,80E-02 |
| 13763 | C | A  | ND5 | 2,60E-01 | 3,30E-02 | 1,90E-01 | 7,10E-02 |
| 13804 | G | A  | ND5 | 2,60E-01 | 3,60E-02 | 2,00E-01 | 4,50E-02 |
| 13816 | A | C  | ND5 | 2,60E-01 | 3,30E-02 | 1,90E-01 | 7,10E-02 |



|       |   |   |     |          |          |          |          |
|-------|---|---|-----|----------|----------|----------|----------|
| 13886 | T | C | ND5 | 1,50E-02 | 1,70E-01 | 1,00E+00 | 1,80E-02 |
| 13908 | C | T | ND5 | 2,60E-01 | 3,30E-02 | 1,90E-01 | 7,10E-02 |
| 14149 | C | T | ND6 | 1,20E-01 | 7,20E-03 | 1,70E-01 | 1,30E-02 |
| 14170 | A | T | ND6 | 2,60E-01 | 6,30E-02 | 3,40E-01 | 4,60E-02 |
| 14172 | T | G | ND6 | 2,60E-01 | 6,30E-02 | 3,50E-01 | 4,70E-02 |
| 14182 | T | C | ND6 | 2,00E-01 | 4,50E-02 | 3,10E-01 | 3,50E-02 |
| 14280 | A | G | ND6 | 4,00E-02 | 9,30E-03 | 2,10E-01 | 3,30E-03 |
| 14305 | G | A | ND6 | 1,60E-02 | 6,30E-02 | 9,10E-01 | 4,80E-03 |
| 14311 | T | C | ND6 | 1,30E-01 | 1,80E-01 | 1,00E+00 | 4,20E-02 |
| 14323 | G | A | ND6 | 3,90E-02 | 1,80E-01 | 8,40E-01 | 2,10E-02 |
| 14362 | C | T | ND6 | 3,80E-02 | 2,00E-01 | 8,10E-01 | 2,40E-02 |
| 14364 | G | A | ND6 | 2,60E-02 | 2,60E-01 | 6,70E-01 | 2,60E-02 |
| 14368 | C | T | ND6 | 4,00E-02 | 2,40E-01 | 7,70E-01 | 2,90E-02 |
| 14467 | A | G | ND6 | 2,60E-01 | 3,80E-02 | 1,80E-01 | 1,10E-01 |
| 14470 | T | C | ND6 | 2,20E-01 | 4,20E-02 | 2,30E-01 | 4,20E-02 |
| 14494 | T | C | ND6 | 1,80E-01 | 3,30E-02 | 2,10E-01 | 2,50E-02 |
| 14524 | A | G | ND6 | 1,30E-01 | 5,30E-03 | 1,10E-01 | 1,90E-02 |

|       |    |    |      |          |          |          |          |
|-------|----|----|------|----------|----------|----------|----------|
| 14536 | AA | GT | ND6  | 2,60E-01 | 3,30E-02 | 1,90E-01 | 7,10E-02 |
| 14562 | C  | T  | ND6  | 2,60E-01 | 3,30E-02 | 1,90E-01 | 7,10E-02 |
| 14608 | C  | T  | ND6  | 2,60E-01 | 3,30E-02 | 1,90E-01 | 7,10E-02 |
| 14668 | CA | TG | ND6  | 2,60E-01 | 6,30E-02 | 3,20E-01 | 4,40E-02 |
| 14757 | T  | C  | CYTB | 1,30E-01 | 1,70E-01 | 9,50E-01 | 4,40E-02 |
| 14774 | C  | T  | CYTB | 1,40E-01 | 1,30E-02 | 1,50E-01 | 3,30E-02 |
| 14776 | A  | G  | CYTB | 8,70E-02 | 5,30E-03 | 1,20E-01 | 1,90E-02 |
| 14793 | A  | G  | CYTB | 1,90E-01 | 3,30E-02 | 2,10E-01 | 3,50E-02 |
| 14798 | T  | C  | CYTB | 2,60E-01 | 3,30E-02 | 1,90E-01 | 7,10E-02 |
| 14800 | C  | T  | CYTB | 3,60E-02 | 6,30E-02 | 8,30E-01 | 9,30E-03 |
| 14854 | C  | T  | CYTB | 1,20E-01 | 2,10E-02 | 2,10E-01 | 1,70E-02 |
| 14860 | C  | T  | CYTB | 2,20E-01 | 3,40E-02 | 2,00E-01 | 5,00E-02 |
| 14871 | T  | C  | CYTB | 2,20E-01 | 3,30E-02 | 1,90E-01 | 6,90E-02 |
| 14873 | C  | A  | CYTB | 1,20E-01 | 7,40E-03 | 1,10E-01 | 4,20E-02 |
| 14875 | C  | T  | CYTB | 4,30E-02 | 1,50E-03 | 6,70E-02 | 1,30E-02 |
| 14881 | C  | G  | CYTB | 2,60E-01 | 4,10E-02 | 1,80E-01 | 1,10E-01 |
| 14883 | CC | TT | CYTB | 2,60E-01 | 3,30E-02 | 1,90E-01 | 7,10E-02 |

|       |    |    |      |          |          |          |          |
|-------|----|----|------|----------|----------|----------|----------|
| 14911 | C  | A  | CYTB | 2,60E-01 | 6,30E-02 | 3,30E-01 | 4,50E-02 |
| 14923 | C  | T  | CYTB | 1,30E-01 | 4,20E-02 | 4,40E-01 | 2,00E-02 |
| 14935 | T  | C  | CYTB | 3,70E-02 | 3,90E-02 | 6,90E-01 | 6,00E-03 |
| 14941 | A  | G  | CYTB | 1,10E-01 | 7,40E-03 | 1,50E-01 | 2,40E-02 |
| 14998 | C  | T  | CYTB | 2,60E-01 | 6,30E-02 | 3,50E-01 | 4,70E-02 |
| 15019 | T  | C  | CYTB | 2,10E-02 | 4,10E-02 | 6,60E-01 | 3,80E-03 |
| 15043 | G  | C  | CYTB | 3,50E-02 | 6,30E-02 | 7,80E-01 | 8,30E-03 |
| 15061 | A  | C  | CYTB | 8,30E-02 | 2,30E-01 | 9,30E-01 | 3,60E-02 |
| 15074 | TC | CT | CYTB | 9,90E-02 | 9,30E-02 | 8,10E-01 | 2,40E-02 |
| 15077 | G  | A  | CYTB | 2,60E-01 | 3,30E-02 | 1,90E-01 | 7,10E-02 |
| 15298 | CT | TC | CYTB | 2,60E-01 | 6,30E-02 | 3,30E-01 | 4,50E-02 |
| 15346 | G  | A  | CYTB | 9,50E-02 | 2,60E-01 | 8,30E-01 | 4,50E-02 |
| 15596 | G  | A  | CYTB | 1,80E-01 | 1,70E-02 | 2,00E-01 | 2,40E-02 |
| 15598 | C  | T  | CYTB | 2,60E-01 | 3,90E-02 | 2,00E-01 | 4,60E-02 |
| 15601 | T  | C  | CYTB | 2,60E-01 | 3,90E-02 | 2,00E-01 | 4,60E-02 |
| 15604 | C  | T  | CYTB | 2,60E-01 | 3,70E-02 | 2,00E-01 | 4,50E-02 |
| 15617 | G  | A  | CYTB | 1,30E-01 | 5,30E-03 | 1,10E-01 | 1,90E-02 |

|       |    |    |      |          |          |          |          |
|-------|----|----|------|----------|----------|----------|----------|
| 15619 | C  | T  | CYTB | 1,20E-01 | 7,20E-03 | 1,70E-01 | 1,30E-02 |
| 15622 | T  | A  | CYTB | 1,80E-01 | 1,70E-02 | 2,00E-01 | 2,40E-02 |
| 15622 | T  | C  | CYTB | 2,60E-01 | 3,30E-02 | 1,90E-01 | 7,10E-02 |
| 15628 | AT | TC | CYTB | 1,10E-01 | 7,10E-03 | 1,70E-01 | 1,30E-02 |
| 15653 | AT | GC | CYTB | 4,40E-02 | 2,50E-03 | 1,50E-01 | 2,80E-03 |
| 15658 | C  | T  | CYTB | 4,30E-02 | 2,30E-03 | 1,50E-01 | 2,80E-03 |
| 15661 | C  | T  | CYTB | 7,40E-02 | 5,30E-03 | 1,90E-01 | 6,30E-03 |
| 15664 | C  | A  | CYTB | 7,40E-02 | 5,30E-03 | 1,90E-01 | 6,30E-03 |
| 15699 | G  | A  | CYTB | 1,50E-01 | 1,60E-02 | 2,00E-01 | 2,70E-02 |
| 15704 | C  | T  | CYTB | 1,50E-01 | 1,60E-02 | 2,00E-01 | 2,70E-02 |
| 15714 | CA | TC | CYTB | 9,50E-02 | 7,10E-03 | 1,10E-01 | 3,40E-02 |
| 15718 | T  | A  | CYTB | 9,60E-02 | 7,20E-03 | 1,10E-01 | 3,40E-02 |
| 15725 | C  | T  | CYTB | 1,50E-01 | 1,60E-02 | 1,50E-01 | 6,30E-02 |
| 15734 | G  | A  | CYTB | 9,00E-02 | 5,30E-03 | 1,30E-01 | 1,90E-02 |
| 15745 | C  | T  | CYTB | 1,40E-01 | 1,30E-02 | 1,50E-01 | 3,30E-02 |
| 15747 | TT | CC | CYTB | 1,40E-01 | 1,30E-02 | 1,50E-01 | 3,30E-02 |
| 15760 | C  | T  | CYTB | 7,10E-02 | 2,90E-03 | 7,10E-02 | 2,00E-02 |

|       |      |      |      |          |          |          |          |
|-------|------|------|------|----------|----------|----------|----------|
| 15775 | A    | G    | CYTB | 7,10E-02 | 2,90E-03 | 7,10E-02 | 2,10E-02 |
| 15777 | G    | A    | CYTB | 7,10E-02 | 2,90E-03 | 7,10E-02 | 2,10E-02 |
| 15786 | T    | TCAC | CYTB | 7,10E-02 | 3,00E-03 | 7,10E-02 | 2,10E-02 |
| 15793 | CATT | C    | CYTB | 7,20E-02 | 3,00E-03 | 7,10E-02 | 2,20E-02 |
| 15812 | G    | A    | CYTB | 2,60E-01 | 3,30E-02 | 1,90E-01 | 7,10E-02 |
| 15924 | A    | G    | TRNT | 2,60E-01 | 3,30E-02 | 1,90E-01 | 7,10E-02 |
| 16034 | G    | A    | NA   | 3,40E-02 | 2,00E-01 | 1,00E+00 | 2,80E-02 |
| 16035 | G    | A    | NA   | 2,70E-03 | 9,50E-02 | 1,00E+00 | 5,30E-03 |
| 16036 | G    | A    | NA   | 7,20E-03 | 1,20E-01 | 1,00E+00 | 9,70E-03 |
| 16093 | T    | C    | NA   | 1,40E-01 | 1,40E-02 | 1,90E-01 | 2,50E-02 |
| 16124 | T    | C    | NA   | 1,30E-02 | 9,50E-02 | 9,70E-01 | 1,30E-02 |
| 16218 | C    | T    | NA   | 6,20E-03 | 6,30E-01 | 2,90E-01 | 3,80E-02 |
| 16230 | A    | G    | NA   | 1,30E-02 | 3,50E-01 | 6,40E-01 | 1,90E-02 |
| 16249 | T    | C    | NA   | 9,90E-03 | 5,70E-01 | 3,70E-01 | 3,60E-02 |
| 16257 | C    | CA   | NA   | 9,30E-03 | 8,00E-01 | 2,20E-01 | 6,90E-02 |
| 16263 | TC   | T    | NA   | 9,50E-03 | 7,20E-01 | 2,20E-01 | 6,70E-02 |
| 16265 | A    | T    | NA   | 2,60E-01 | 3,30E-02 | 1,90E-01 | 7,10E-02 |

|       |   |   |    |          |          |          |          |
|-------|---|---|----|----------|----------|----------|----------|
| 16284 | A | G | NA | 1,50E-02 | 9,70E-01 | 2,00E-01 | 1,10E-01 |
| 16288 | T | C | NA | 1,70E-02 | 9,90E-01 | 2,00E-01 | 1,10E-01 |
| 16290 | C | T | NA | 2,70E-02 | 4,00E-01 | 1,80E-01 | 4,30E-01 |
| 16293 | A | C | NA | 1,60E-02 | 9,10E-01 | 2,00E-01 | 1,30E-01 |
| 16293 | A | G | NA | 7,10E-02 | 6,50E-03 | 7,10E-02 | 7,10E-02 |
| 16301 | C | T | NA | 4,70E-02 | 9,90E-01 | 2,60E-01 | 1,30E-01 |

Supplementary Table S8: Variant annotation.

| Pos | Ref | Alt | Csq | dbSNP155 | Uniprot | Uniprot | AA  | AA  | AA  |
|-----|-----|-----|-----|----------|---------|---------|-----|-----|-----|
|     |     |     |     | id       | name    | id      | pos | ref | alt |
| 106 | G   | A   | INT | NA       | NA      | NA      | NA  | NA  | NA  |
| 159 | T   | G   | INT | NA       | NA      | NA      | NA  | NA  | NA  |
| 163 | G   | A   | INT | NA       | NA      | NA      | NA  | NA  | NA  |
| 180 | TA  | CC  | INT | NA       | NA      | NA      | NA  | NA  | NA  |
| 185 | G   | A   | INT | NA       | NA      | NA      | NA  | NA  | NA  |
| 302 | A   | AC  | INT | NA       | NA      | NA      | NA  | NA  | NA  |
| 310 | T   | TC  | INT | NA       | NA      | NA      | NA  | NA  | NA  |

|     |       |    |     |    |    |    |    |    |    |
|-----|-------|----|-----|----|----|----|----|----|----|
| 310 | T     | C  | INT | NA | NA | NA | NA | NA | NA |
| 318 | T     | C  | INT | NA | NA | NA | NA | NA | NA |
| 322 | G     | T  | INT | NA | NA | NA | NA | NA | NA |
| 456 | C     | T  | INT | NA | NA | NA | NA | NA | NA |
| 493 | A     | G  | INT | NA | NA | NA | NA | NA | NA |
| 499 | G     | C  | INT | NA | NA | NA | NA | NA | NA |
| 564 | G     | A  | INT | NA | NA | NA | NA | NA | NA |
| 750 | A     | G  | INT | NA | NA | NA | NA | NA | NA |
| 756 | C     | T  | INT | NA | NA | NA | NA | NA | NA |
| 764 | ACG   | A  | INT | NA | NA | NA | NA | NA | NA |
| 766 | GCAGC | G  | INT | NA | NA | NA | NA | NA | NA |
| 769 | GC    | TT | INT | NA | NA | NA | NA | NA | NA |
| 769 | GC    | CA | INT | NA | NA | NA | NA | NA | NA |
| 809 | G     | A  | INT | NA | NA | NA | NA | NA | NA |
| 813 | A     | G  | INT | NA | NA | NA | NA | NA | NA |
| 825 | T     | A  | INT | NA | NA | NA | NA | NA | NA |
| 828 | C     | T  | INT | NA | NA | NA | NA | NA | NA |

|      |     |     |     |    |    |    |    |    |    |
|------|-----|-----|-----|----|----|----|----|----|----|
| 843  | G   | A   | INT | NA | NA | NA | NA | NA | NA |
| 870  | C   | T   | INT | NA | NA | NA | NA | NA | NA |
| 877  | G   | C   | INT | NA | NA | NA | NA | NA | NA |
| 880  | C   | T   | INT | NA | NA | NA | NA | NA | NA |
| 883  | T   | G   | INT | NA | NA | NA | NA | NA | NA |
| 906  | C   | T   | INT | NA | NA | NA | NA | NA | NA |
| 917  | CA  | TG  | INT | NA | NA | NA | NA | NA | NA |
| 921  | TC  | CT  | INT | NA | NA | NA | NA | NA | NA |
| 921  | T   | C   | INT | NA | NA | NA | NA | NA | NA |
| 930  | GC  | CT  | INT | NA | NA | NA | NA | NA | NA |
| 933  | G   | A   | INT | NA | NA | NA | NA | NA | NA |
| 964  | C   | CT  | INT | NA | NA | NA | NA | NA | NA |
| 1009 | C   | T   | INT | NA | NA | NA | NA | NA | NA |
| 1039 | AT  | GC  | INT | NA | NA | NA | NA | NA | NA |
| 1104 | A   | C   | INT | NA | NA | NA | NA | NA | NA |
| 1106 | CTC | TAT | INT | NA | NA | NA | NA | NA | NA |
| 1111 | C   | T   | INT | NA | NA | NA | NA | NA | NA |



|      |     |     |     |    |    |    |    |    |    |
|------|-----|-----|-----|----|----|----|----|----|----|
| 1120 | C   | T   | INT | NA | NA | NA | NA | NA | NA |
| 1128 | CTG | C   | INT | NA | NA | NA | NA | NA | NA |
| 1128 | C   | CAA | INT | NA | NA | NA | NA | NA | NA |
| 1129 | TGC | T   | INT | NA | NA | NA | NA | NA | NA |
| 1131 | C   | CAT | INT | NA | NA | NA | NA | NA | NA |
| 1133 | CG  | TA  | INT | NA | NA | NA | NA | NA | NA |
| 1141 | C   | T   | INT | NA | NA | NA | NA | NA | NA |
| 1147 | G   | A   | INT | NA | NA | NA | NA | NA | NA |
| 1151 | C   | A   | INT | NA | NA | NA | NA | NA | NA |
| 1156 | C   | G   | INT | NA | NA | NA | NA | NA | NA |
| 1173 | C   | T   | INT | NA | NA | NA | NA | NA | NA |
| 1178 | G   | A   | INT | NA | NA | NA | NA | NA | NA |
| 1185 | C   | T   | INT | NA | NA | NA | NA | NA | NA |
| 1197 | G   | A   | INT | NA | NA | NA | NA | NA | NA |
| 1211 | G   | A   | INT | NA | NA | NA | NA | NA | NA |
| 1217 | G   | A   | INT | NA | NA | NA | NA | NA | NA |
| 1220 | A   | G   | INT | NA | NA | NA | NA | NA | NA |

|      |     |     |     |    |    |    |    |    |    |
|------|-----|-----|-----|----|----|----|----|----|----|
| 1226 | C   | T   | INT | NA | NA | NA | NA | NA | NA |
| 1227 | G   | A   | INT | NA | NA | NA | NA | NA | NA |
| 1228 | AT  | A   | INT | NA | NA | NA | NA | NA | NA |
| 1230 | CA  | TT  | INT | NA | NA | NA | NA | NA | NA |
| 1240 | A   | G   | INT | NA | NA | NA | NA | NA | NA |
| 1247 | G   | GCC | INT | NA | NA | NA | NA | NA | NA |
| 1249 | T   | C   | INT | NA | NA | NA | NA | NA | NA |
| 1253 | C   | A   | INT | NA | NA | NA | NA | NA | NA |
| 1257 | T   | A   | INT | NA | NA | NA | NA | NA | NA |
| 1261 | CC  | GG  | INT | NA | NA | NA | NA | NA | NA |
| 1263 | G   | T   | INT | NA | NA | NA | NA | NA | NA |
| 1281 | TG  | T   | INT | NA | NA | NA | NA | NA | NA |
| 1282 | GAT | G   | INT | NA | NA | NA | NA | NA | NA |
| 1284 | TG  | AA  | INT | NA | NA | NA | NA | NA | NA |
| 1285 | G   | GA  | INT | NA | NA | NA | NA | NA | NA |
| 1289 | GC  | TT  | INT | NA | NA | NA | NA | NA | NA |
| 1290 | C   | T   | INT | NA | NA | NA | NA | NA | NA |

|      |     |     |     |    |    |    |    |    |    |
|------|-----|-----|-----|----|----|----|----|----|----|
| 1291 | T   | C   | INT | NA | NA | NA | NA | NA | NA |
| 1291 | TA  | CG  | INT | NA | NA | NA | NA | NA | NA |
| 1292 | A   | G   | INT | NA | NA | NA | NA | NA | NA |
| 1293 | C   | T   | INT | NA | NA | NA | NA | NA | NA |
| 1295 | A   | G   | INT | NA | NA | NA | NA | NA | NA |
| 1303 | G   | A   | INT | NA | NA | NA | NA | NA | NA |
| 1310 | C   | T   | INT | NA | NA | NA | NA | NA | NA |
| 1311 | C   | CTA | INT | NA | NA | NA | NA | NA | NA |
| 1311 | C   | A   | INT | NA | NA | NA | NA | NA | NA |
| 1312 | C   | T   | INT | NA | NA | NA | NA | NA | NA |
| 1314 | CGT | C   | INT | NA | NA | NA | NA | NA | NA |
| 1315 | G   | A   | INT | NA | NA | NA | NA | NA | NA |
| 1320 | G   | A   | INT | NA | NA | NA | NA | NA | NA |
| 1323 | G   | T   | INT | NA | NA | NA | NA | NA | NA |
| 1362 | GC  | G   | INT | NA | NA | NA | NA | NA | NA |
| 1364 | T   | A   | INT | NA | NA | NA | NA | NA | NA |
| 1367 | A   | G   | INT | NA | NA | NA | NA | NA | NA |

|      |     |        |     |    |    |    |    |    |    |
|------|-----|--------|-----|----|----|----|----|----|----|
| 1375 | C   | CA     | INT | NA | NA | NA | NA | NA | NA |
| 1376 | CC  | TT     | INT | NA | NA | NA | NA | NA | NA |
| 1376 | C   | T      | INT | NA | NA | NA | NA | NA | NA |
| 1384 | ACT | A      | INT | NA | NA | NA | NA | NA | NA |
| 1387 | A   | ATGTCG | INT | NA | NA | NA | NA | NA | NA |
| 1388 | C   | T      | INT | NA | NA | NA | NA | NA | NA |
| 1391 | T   | C      | INT | NA | NA | NA | NA | NA | NA |
| 1393 | GC  | G      | INT | NA | NA | NA | NA | NA | NA |
| 1393 | G   | A      | INT | NA | NA | NA | NA | NA | NA |
| 1396 | C   | G      | INT | NA | NA | NA | NA | NA | NA |
| 1398 | T   | G      | INT | NA | NA | NA | NA | NA | NA |
| 1405 | CT  | TC     | INT | NA | NA | NA | NA | NA | NA |
| 1405 | C   | T      | INT | NA | NA | NA | NA | NA | NA |
| 1412 | G   | GC     | INT | NA | NA | NA | NA | NA | NA |
| 1413 | TCG | T      | INT | NA | NA | NA | NA | NA | NA |
| 1414 | CG  | C      | INT | NA | NA | NA | NA | NA | NA |
| 1420 | T   | A      | INT | NA | NA | NA | NA | NA | NA |

|      |    |    |     |    |    |    |    |    |    |
|------|----|----|-----|----|----|----|----|----|----|
| 1431 | G  | A  | INT | NA | NA | NA | NA | NA | NA |
| 1436 | C  | T  | INT | NA | NA | NA | NA | NA | NA |
| 1437 | T  | C  | INT | NA | NA | NA | NA | NA | NA |
| 1438 | A  | G  | INT | NA | NA | NA | NA | NA | NA |
| 1443 | T  | C  | INT | NA | NA | NA | NA | NA | NA |
| 1450 | C  | T  | INT | NA | NA | NA | NA | NA | NA |
| 1453 | A  | G  | INT | NA | NA | NA | NA | NA | NA |
| 1454 | G  | A  | INT | NA | NA | NA | NA | NA | NA |
| 1460 | C  | T  | INT | NA | NA | NA | NA | NA | NA |
| 1462 | G  | A  | INT | NA | NA | NA | NA | NA | NA |
| 1466 | CC | TA | INT | NA | NA | NA | NA | NA | NA |
| 1467 | C  | A  | INT | NA | NA | NA | NA | NA | NA |
| 1469 | G  | A  | INT | NA | NA | NA | NA | NA | NA |
| 1474 | G  | A  | INT | NA | NA | NA | NA | NA | NA |
| 1476 | GT | AC | INT | NA | NA | NA | NA | NA | NA |
| 1477 | T  | C  | INT | NA | NA | NA | NA | NA | NA |
| 1485 | G  | A  | INT | NA | NA | NA | NA | NA | NA |

|      |        |     |     |    |    |    |    |    |    |
|------|--------|-----|-----|----|----|----|----|----|----|
| 1556 | C      | T   | INT | NA | NA | NA | NA | NA | NA |
| 1597 | C      | T   | INT | NA | NA | NA | NA | NA | NA |
| 1604 | GA     | AG  | INT | NA | NA | NA | NA | NA | NA |
| 1626 | C      | T   | INT | NA | NA | NA | NA | NA | NA |
| 1628 | CAA    | TGT | INT | NA | NA | NA | NA | NA | NA |
| 1637 | CTTAGG | C   | INT | NA | NA | NA | NA | NA | NA |
| 1642 | G      | A   | INT | NA | NA | NA | NA | NA | NA |
| 1651 | A      | C   | INT | NA | NA | NA | NA | NA | NA |
| 1653 | T      | A   | INT | NA | NA | NA | NA | NA | NA |
| 1654 | T      | C   | INT | NA | NA | NA | NA | NA | NA |
| 1657 | C      | T   | INT | NA | NA | NA | NA | NA | NA |
| 1664 | G      | A   | INT | NA | NA | NA | NA | NA | NA |
| 1666 | TC     | CT  | INT | NA | NA | NA | NA | NA | NA |
| 1673 | T      | C   | RNA | NA | NA | NA | NA | NA | NA |
| 1693 | C      | T   | RNA | NA | NA | NA | NA | NA | NA |
| 1808 | AT     | GC  | RNA | NA | NA | NA | NA | NA | NA |
| 1824 | T      | C   | RNA | NA | NA | NA | NA | NA | NA |

|      |        |     |     |    |    |    |    |    |    |
|------|--------|-----|-----|----|----|----|----|----|----|
| 1874 | A      | T   | RNA | NA | NA | NA | NA | NA | NA |
| 1882 | AG     | TA  | RNA | NA | NA | NA | NA | NA | NA |
| 1883 | G      | A   | RNA | NA | NA | NA | NA | NA | NA |
| 1888 | G      | A   | RNA | NA | NA | NA | NA | NA | NA |
| 1896 | T      | C   | RNA | NA | NA | NA | NA | NA | NA |
| 1900 | A      | G   | RNA | NA | NA | NA | NA | NA | NA |
| 1905 | CG     | TA  | RNA | NA | NA | NA | NA | NA | NA |
| 1924 | T      | C   | RNA | NA | NA | NA | NA | NA | NA |
| 1934 | T      | G   | RNA | NA | NA | NA | NA | NA | NA |
| 1949 | G      | A   | RNA | NA | NA | NA | NA | NA | NA |
| 1959 | C      | T   | RNA | NA | NA | NA | NA | NA | NA |
| 1971 | A      | G   | RNA | NA | NA | NA | NA | NA | NA |
| 1975 | T      | A   | RNA | NA | NA | NA | NA | NA | NA |
| 1977 | T      | C   | RNA | NA | NA | NA | NA | NA | NA |
| 1979 | TAGGTA | T   | RNA | NA | NA | NA | NA | NA | NA |
| 1986 | A      | T   | RNA | NA | NA | NA | NA | NA | NA |
| 1987 | G      | GCA | RNA | NA | NA | NA | NA | NA | NA |

|      |      |      |     |    |    |    |    |    |    |
|------|------|------|-----|----|----|----|----|----|----|
| 1989 | C    | CAGT | RNA | NA | NA | NA | NA | NA | NA |
| 1989 | C    | T    | RNA | NA | NA | NA | NA | NA | NA |
| 1992 | C    | T    | RNA | NA | NA | NA | NA | NA | NA |
| 1994 | AA   | CG   | RNA | NA | NA | NA | NA | NA | NA |
| 1995 | A    | G    | RNA | NA | NA | NA | NA | NA | NA |
| 1999 | A    | C    | RNA | NA | NA | NA | NA | NA | NA |
| 2001 | C    | T    | RNA | NA | NA | NA | NA | NA | NA |
| 2002 | G    | A    | RNA | NA | NA | NA | NA | NA | NA |
| 2008 | G    | A    | RNA | NA | NA | NA | NA | NA | NA |
| 2016 | CT   | C    | RNA | NA | NA | NA | NA | NA | NA |
| 2030 | T    | C    | RNA | NA | NA | NA | NA | NA | NA |
| 2053 | T    | C    | RNA | NA | NA | NA | NA | NA | NA |
| 2056 | G    | A    | RNA | NA | NA | NA | NA | NA | NA |
| 2059 | C    | T    | RNA | NA | NA | NA | NA | NA | NA |
| 2065 | ACCC | A    | RNA | NA | NA | NA | NA | NA | NA |
| 2071 | T    | C    | RNA | NA | NA | NA | NA | NA | NA |
| 2080 | T    | C    | RNA | NA | NA | NA | NA | NA | NA |



|      |     |      |     |    |    |    |    |    |    |
|------|-----|------|-----|----|----|----|----|----|----|
| 2162 | C   | T    | RNA | NA | NA | NA | NA | NA | NA |
| 2168 | T   | C    | RNA | NA | NA | NA | NA | NA | NA |
| 2218 | C   | CTGT | RNA | NA | NA | NA | NA | NA | NA |
| 2220 | AC  | A    | RNA | NA | NA | NA | NA | NA | NA |
| 2222 | TA  | T    | RNA | NA | NA | NA | NA | NA | NA |
| 2222 | TAC | T    | RNA | NA | NA | NA | NA | NA | NA |
| 2224 | C   | CGT  | RNA | NA | NA | NA | NA | NA | NA |
| 2242 | T   | C    | RNA | NA | NA | NA | NA | NA | NA |
| 2244 | T   | C    | RNA | NA | NA | NA | NA | NA | NA |
| 2251 | A   | G    | RNA | NA | NA | NA | NA | NA | NA |
| 2257 | C   | T    | RNA | NA | NA | NA | NA | NA | NA |
| 2257 | CA  | TG   | RNA | NA | NA | NA | NA | NA | NA |
| 2262 | C   | T    | RNA | NA | NA | NA | NA | NA | NA |
| 2280 | C   | T    | RNA | NA | NA | NA | NA | NA | NA |
| 2284 | C   | T    | RNA | NA | NA | NA | NA | NA | NA |
| 2294 | A   | G    | RNA | NA | NA | NA | NA | NA | NA |
| 2343 | G   | A    | RNA | NA | NA | NA | NA | NA | NA |

|      |     |     |     |    |    |    |    |    |    |
|------|-----|-----|-----|----|----|----|----|----|----|
| 2345 | G   | A   | RNA | NA | NA | NA | NA | NA | NA |
| 2351 | TT  | CC  | RNA | NA | NA | NA | NA | NA | NA |
| 2357 | C   | T   | RNA | NA | NA | NA | NA | NA | NA |
| 2359 | C   | T   | RNA | NA | NA | NA | NA | NA | NA |
| 2361 | G   | A   | RNA | NA | NA | NA | NA | NA | NA |
| 2404 | T   | C   | RNA | NA | NA | NA | NA | NA | NA |
| 2423 | C   | T   | RNA | NA | NA | NA | NA | NA | NA |
| 2442 | T   | C   | RNA | NA | NA | NA | NA | NA | NA |
| 2445 | T   | C   | RNA | NA | NA | NA | NA | NA | NA |
| 2523 | C   | T   | RNA | NA | NA | NA | NA | NA | NA |
| 2525 | C   | T   | RNA | NA | NA | NA | NA | NA | NA |
| 2541 | CG  | C   | RNA | NA | NA | NA | NA | NA | NA |
| 2541 | C   | T   | RNA | NA | NA | NA | NA | NA | NA |
| 2541 | CGC | TAT | RNA | NA | NA | NA | NA | NA | NA |
| 2546 | G   | GTC | RNA | NA | NA | NA | NA | NA | NA |
| 2550 | A   | G   | RNA | NA | NA | NA | NA | NA | NA |
| 2557 | C   | T   | RNA | NA | NA | NA | NA | NA | NA |

|      |    |    |     |    |    |    |    |    |    |
|------|----|----|-----|----|----|----|----|----|----|
| 2560 | G  | A  | RNA | NA | NA | NA | NA | NA | NA |
| 2563 | T  | C  | RNA | NA | NA | NA | NA | NA | NA |
| 2566 | C  | T  | RNA | NA | NA | NA | NA | NA | NA |
| 2567 | G  | A  | RNA | NA | NA | NA | NA | NA | NA |
| 2569 | CC | TG | RNA | NA | NA | NA | NA | NA | NA |
| 2570 | C  | T  | RNA | NA | NA | NA | NA | NA | NA |
| 2571 | G  | A  | RNA | NA | NA | NA | NA | NA | NA |
| 2572 | C  | T  | RNA | NA | NA | NA | NA | NA | NA |
| 2573 | G  | A  | RNA | NA | NA | NA | NA | NA | NA |
| 2573 | G  | C  | RNA | NA | NA | NA | NA | NA | NA |
| 2577 | C  | T  | RNA | NA | NA | NA | NA | NA | NA |
| 2581 | A  | G  | RNA | NA | NA | NA | NA | NA | NA |
| 2588 | CA | C  | RNA | NA | NA | NA | NA | NA | NA |
| 2589 | A  | G  | RNA | NA | NA | NA | NA | NA | NA |
| 2590 | A  | C  | RNA | NA | NA | NA | NA | NA | NA |
| 2612 | CT | TC | RNA | NA | NA | NA | NA | NA | NA |
| 2613 | T  | C  | RNA | NA | NA | NA | NA | NA | NA |

|      |     |    |     |    |    |    |    |    |    |
|------|-----|----|-----|----|----|----|----|----|----|
| 2617 | A   | G  | RNA | NA | NA | NA | NA | NA | NA |
| 2625 | C   | T  | RNA | NA | NA | NA | NA | NA | NA |
| 2628 | T   | A  | RNA | NA | NA | NA | NA | NA | NA |
| 2636 | GCT | G  | RNA | NA | NA | NA | NA | NA | NA |
| 2637 | C   | T  | RNA | NA | NA | NA | NA | NA | NA |
| 2638 | TC  | CA | RNA | NA | NA | NA | NA | NA | NA |
| 2639 | C   | A  | RNA | NA | NA | NA | NA | NA | NA |
| 2642 | C   | T  | RNA | NA | NA | NA | NA | NA | NA |
| 2643 | G   | A  | RNA | NA | NA | NA | NA | NA | NA |
| 2643 | G   | C  | RNA | NA | NA | NA | NA | NA | NA |
| 2645 | G   | A  | RNA | NA | NA | NA | NA | NA | NA |
| 2647 | G   | A  | RNA | NA | NA | NA | NA | NA | NA |
| 2655 | GTC | G  | RNA | NA | NA | NA | NA | NA | NA |
| 2666 | TT  | CC | RNA | NA | NA | NA | NA | NA | NA |
| 2667 | T   | C  | RNA | NA | NA | NA | NA | NA | NA |
| 2670 | C   | T  | RNA | NA | NA | NA | NA | NA | NA |
| 2679 | T   | C  | RNA | NA | NA | NA | NA | NA | NA |

|      |     |        |     |    |    |    |    |    |    |
|------|-----|--------|-----|----|----|----|----|----|----|
| 2683 | C   | T      | RNA | NA | NA | NA | NA | NA | NA |
| 2686 | G   | A      | RNA | NA | NA | NA | NA | NA | NA |
| 2686 | GC  | AT     | RNA | NA | NA | NA | NA | NA | NA |
| 2690 | G   | A      | RNA | NA | NA | NA | NA | NA | NA |
| 2697 | GG  | AA     | RNA | NA | NA | NA | NA | NA | NA |
| 2701 | GGC | G      | RNA | NA | NA | NA | NA | NA | NA |
| 2702 | GC  | AT     | RNA | NA | NA | NA | NA | NA | NA |
| 2705 | T   | TG     | RNA | NA | NA | NA | NA | NA | NA |
| 2706 | A   | G      | RNA | NA | NA | NA | NA | NA | NA |
| 2708 | C   | T      | RNA | NA | NA | NA | NA | NA | NA |
| 2709 | AC  | A      | RNA | NA | NA | NA | NA | NA | NA |
| 2710 | C   | T      | RNA | NA | NA | NA | NA | NA | NA |
| 2712 | GC  | AT     | RNA | NA | NA | NA | NA | NA | NA |
| 2714 | A   | AATAAG | RNA | NA | NA | NA | NA | NA | NA |
| 2717 | ACG | A      | RNA | NA | NA | NA | NA | NA | NA |
| 2718 | C   | T      | RNA | NA | NA | NA | NA | NA | NA |
| 2744 | T   | C      | RNA | NA | NA | NA | NA | NA | NA |

|      |     |     |     |    |    |    |    |    |    |
|------|-----|-----|-----|----|----|----|----|----|----|
| 2778 | T   | C   | RNA | NA | NA | NA | NA | NA | NA |
| 2864 | TC  | AT  | RNA | NA | NA | NA | NA | NA | NA |
| 2868 | C   | A   | RNA | NA | NA | NA | NA | NA | NA |
| 2877 | C   | T   | INT | NA | NA | NA | NA | NA | NA |
| 2881 | C   | T   | INT | NA | NA | NA | NA | NA | NA |
| 2884 | CTA | C   | INT | NA | NA | NA | NA | NA | NA |
| 2887 | T   | C   | INT | NA | NA | NA | NA | NA | NA |
| 2889 | C   | CGT | INT | NA | NA | NA | NA | NA | NA |
| 2891 | C   | T   | INT | NA | NA | NA | NA | NA | NA |
| 2898 | T   | C   | INT | NA | NA | NA | NA | NA | NA |
| 2911 | C   | T   | INT | NA | NA | NA | NA | NA | NA |
| 2915 | C   | T   | INT | NA | NA | NA | NA | NA | NA |
| 2920 | C   | T   | INT | NA | NA | NA | NA | NA | NA |
| 2933 | G   | T   | INT | NA | NA | NA | NA | NA | NA |
| 2942 | CG  | TA  | INT | NA | NA | NA | NA | NA | NA |
| 2953 | T   | A   | INT | NA | NA | NA | NA | NA | NA |
| 2958 | A   | G   | INT | NA | NA | NA | NA | NA | NA |

|      |    |    |     |    |    |    |    |    |    |
|------|----|----|-----|----|----|----|----|----|----|
| 2964 | T  | C  | INT | NA | NA | NA | NA | NA | NA |
| 2968 | A  | G  | INT | NA | NA | NA | NA | NA | NA |
| 2972 | A  | G  | INT | NA | NA | NA | NA | NA | NA |
| 2976 | G  | A  | INT | NA | NA | NA | NA | NA | NA |
| 2976 | GG | CA | INT | NA | NA | NA | NA | NA | NA |
| 2980 | T  | A  | INT | NA | NA | NA | NA | NA | NA |
| 2983 | G  | T  | INT | NA | NA | NA | NA | NA | NA |
| 2983 | G  | A  | INT | NA | NA | NA | NA | NA | NA |
| 2985 | C  | T  | INT | NA | NA | NA | NA | NA | NA |
| 3009 | CG | TA | INT | NA | NA | NA | NA | NA | NA |
| 3016 | G  | GT | INT | NA | NA | NA | NA | NA | NA |
| 3017 | C  | T  | INT | NA | NA | NA | NA | NA | NA |
| 3018 | AG | A  | INT | NA | NA | NA | NA | NA | NA |
| 3029 | AA | GG | INT | NA | NA | NA | NA | NA | NA |
| 3030 | A  | G  | INT | NA | NA | NA | NA | NA | NA |
| 3035 | C  | T  | INT | NA | NA | NA | NA | NA | NA |
| 3036 | G  | A  | INT | NA | NA | NA | NA | NA | NA |

|      |     |    |     |    |    |    |    |    |    |
|------|-----|----|-----|----|----|----|----|----|----|
| 3046 | C   | T  | INT | NA | NA | NA | NA | NA | NA |
| 3047 | G   | A  | INT | NA | NA | NA | NA | NA | NA |
| 3060 | C   | T  | INT | NA | NA | NA | NA | NA | NA |
| 3068 | G   | C  | INT | NA | NA | NA | NA | NA | NA |
| 3079 | G   | A  | INT | NA | NA | NA | NA | NA | NA |
| 3093 | C   | T  | INT | NA | NA | NA | NA | NA | NA |
| 3104 | TAC | T  | INT | NA | NA | NA | NA | NA | NA |
| 3170 | C   | T  | INT | NA | NA | NA | NA | NA | NA |
| 3176 | A   | G  | INT | NA | NA | NA | NA | NA | NA |
| 3250 | T   | C  | RNA | NA | NA | NA | NA | NA | NA |
| 3253 | T   | C  | RNA | NA | NA | NA | NA | NA | NA |
| 3254 | C   | T  | RNA | NA | NA | NA | NA | NA | NA |
| 3263 | C   | T  | RNA | NA | NA | NA | NA | NA | NA |
| 3275 | C   | T  | RNA | NA | NA | NA | NA | NA | NA |
| 3277 | G   | A  | RNA | NA | NA | NA | NA | NA | NA |
| 3290 | TT  | CC | RNA | NA | NA | NA | NA | NA | NA |
| 3342 | C   | T  | RNA | NA | NA | NA | NA | NA | NA |



|      |    |   |     |    |      |        |     |    |    |
|------|----|---|-----|----|------|--------|-----|----|----|
| 3345 | T  | C | RNA | NA | NA   | NA     | NA  | NA | NA |
| 3565 | A  | C | RNA | .  | NU1M | P03886 | 87  | T  | P  |
| 3579 | A  | C | RNA | .  | NU1M | P03886 | 91  | M  | I  |
| 3687 | C  | T | RNA | NA | NA   | NA     | NA  | NA | NA |
| 3703 | C  | T | RNA | NA | NA   | NA     | NA  | NA | NA |
| 3954 | C  | T | RNA | NA | NA   | NA     | NA  | NA | NA |
| 4113 | G  | A | RNA | NA | NA   | NA     | NA  | NA | NA |
| 4498 | AC | A | RNA | NA | NA   | NA     | NA  | NA | NA |
| 4655 | G  | A | RNA | NA | NA   | NA     | NA  | NA | NA |
| 4847 | C  | T | RNA | NA | NA   | NA     | NA  | NA | NA |
| 4859 | T  | C | RNA | NA | NA   | NA     | NA  | NA | NA |
| 5262 | G  | A | RNA | .  | NU2M | P03891 | 265 | A  | T  |
| 5474 | A  | G | RNA | NA | NA   | NA     | NA  | NA | NA |
| 5648 | A  | G | INT | NA | NA   | NA     | NA  | NA | NA |
| 5667 | G  | T | INT | NA | NA   | NA     | NA  | NA | NA |
| 5681 | C  | T | INT | NA | NA   | NA     | NA  | NA | NA |
| 5734 | T  | C | INT | NA | NA   | NA     | NA  | NA | NA |

|      |    |    |     |    |    |    |    |    |    |
|------|----|----|-----|----|----|----|----|----|----|
| 5754 | GC | G  | INT | NA | NA | NA | NA | NA | NA |
| 5755 | CG | C  | INT | NA | NA | NA | NA | NA | NA |
| 5768 | G  | A  | INT | NA | NA | NA | NA | NA | NA |
| 5774 | T  | A  | INT | NA | NA | NA | NA | NA | NA |
| 5781 | C  | G  | INT | NA | NA | NA | NA | NA | NA |
| 5790 | C  | T  | INT | NA | NA | NA | NA | NA | NA |
| 5806 | T  | C  | INT | NA | NA | NA | NA | NA | NA |
| 5810 | A  | AG | INT | NA | NA | NA | NA | NA | NA |
| 5821 | G  | A  | INT | NA | NA | NA | NA | NA | NA |
| 5840 | C  | T  | INT | NA | NA | NA | NA | NA | NA |
| 5840 | C  | CT | INT | NA | NA | NA | NA | NA | NA |
| 5842 | A  | G  | INT | NA | NA | NA | NA | NA | NA |
| 5846 | C  | T  | INT | NA | NA | NA | NA | NA | NA |
| 6176 | TA | CG | RNA | NA | NA | NA | NA | NA | NA |
| 6182 | G  | A  | RNA | NA | NA | NA | NA | NA | NA |
| 6185 | T  | C  | RNA | NA | NA | NA | NA | NA | NA |
| 6197 | C  | T  | RNA | NA | NA | NA | NA | NA | NA |

|      |     |   |     |    |    |    |    |    |    |
|------|-----|---|-----|----|----|----|----|----|----|
| 6216 | T   | C | RNA | NA | NA | NA | NA | NA | NA |
| 6224 | C   | T | RNA | NA | NA | NA | NA | NA | NA |
| 6226 | CT  | C | RNA | NA | NA | NA | NA | NA | NA |
| 6229 | TCC | T | RNA | NA | NA | NA | NA | NA | NA |
| 6233 | A   | C | RNA | NA | NA | NA | NA | NA | NA |
| 6236 | C   | T | RNA | NA | NA | NA | NA | NA | NA |
| 6242 | C   | T | RNA | NA | NA | NA | NA | NA | NA |
| 6251 | T   | C | RNA | NA | NA | NA | NA | NA | NA |
| 6266 | A   | C | RNA | NA | NA | NA | NA | NA | NA |
| 6266 | A   | T | RNA | NA | NA | NA | NA | NA | NA |
| 6269 | A   | C | RNA | NA | NA | NA | NA | NA | NA |
| 6326 | C   | T | RNA | NA | NA | NA | NA | NA | NA |
| 6335 | C   | T | RNA | NA | NA | NA | NA | NA | NA |
| 6353 | A   | G | RNA | NA | NA | NA | NA | NA | NA |
| 6356 | C   | T | RNA | NA | NA | NA | NA | NA | NA |
| 6452 | C   | T | RNA | NA | NA | NA | NA | NA | NA |
| 6488 | T   | C | RNA | NA | NA | NA | NA | NA | NA |

|      |   |   |     |    |      |        |     |    |    |
|------|---|---|-----|----|------|--------|-----|----|----|
| 6494 | A | C | RNA | NA | NA   | NA     | NA  | NA | NA |
| 6497 | T | C | RNA | NA | NA   | NA     | NA  | NA | NA |
| 6500 | C | T | RNA | NA | NA   | NA     | NA  | NA | NA |
| 6503 | A | C | RNA | NA | NA   | NA     | NA  | NA | NA |
| 6509 | A | G | RNA | NA | NA   | NA     | NA  | NA | NA |
| 6521 | C | T | RNA | NA | NA   | NA     | NA  | NA | NA |
| 6524 | T | C | RNA | NA | NA   | NA     | NA  | NA | NA |
| 6528 | C | T | RNA | NA | NA   | NA     | NA  | NA | NA |
| 6530 | A | C | RNA | NA | NA   | NA     | NA  | NA | NA |
| 6531 | C | T | RNA | NA | NA   | NA     | NA  | NA | NA |
| 6551 | C | T | RNA | NA | NA   | NA     | NA  | NA | NA |
| 6563 | C | T | RNA | NA | NA   | NA     | NA  | NA | NA |
| 6566 | C | T | RNA | NA | NA   | NA     | NA  | NA | NA |
| 6571 | C | T | RNA | .  | COX1 | P00395 | 223 | A  | V  |
| 6578 | A | G | RNA | NA | NA   | NA     | NA  | NA | NA |
| 6665 | C | T | RNA | NA | NA   | NA     | NA  | NA | NA |
| 6812 | A | C | RNA | NA | NA   | NA     | NA  | NA | NA |

|      |   |      |     |              |      |        |     |    |    |
|------|---|------|-----|--------------|------|--------|-----|----|----|
| 6815 | T | C    | RNA | NA           | NA   | NA     | NA  | NA | NA |
| 6824 | C | T    | RNA | NA           | NA   | NA     | NA  | NA | NA |
| 6830 | C | T    | RNA | NA           | NA   | NA     | NA  | NA | NA |
| 6836 | C | T    | RNA | NA           | NA   | NA     | NA  | NA | NA |
| 6848 | C | T    | RNA | NA           | NA   | NA     | NA  | NA | NA |
| 6851 | C | T    | RNA | NA           | NA   | NA     | NA  | NA | NA |
| 6860 | A | G    | RNA | NA           | NA   | NA     | NA  | NA | NA |
| 6863 | A | C    | RNA | NA           | NA   | NA     | NA  | NA | NA |
| 6873 | C | T    | RNA | .            | COX1 | P00395 | 324 | L  | F  |
| 6875 | C | A    | RNA | NA           | NA   | NA     | NA  | NA | NA |
| 6878 | C | T    | RNA | NA           | NA   | NA     | NA  | NA | NA |
| 6881 | A | C    | RNA | NA           | NA   | NA     | NA  | NA | NA |
| 6884 | C | G    | RNA | NA           | NA   | NA     | NA  | NA | NA |
| 6886 | A | ACGG | RNA | NA           | NA   | NA     | NA  | NA | NA |
| 6899 | G | C    | RNA | rs1556423194 | COX1 | P00395 | 332 | M  | I  |
| 6902 | A | G    | RNA | NA           | NA   | NA     | NA  | NA | NA |
| 6909 | G | T    | RNA | .            | COX1 | P00395 | 336 | A  | S  |

|      |   |   |     |              |      |        |     |    |    |
|------|---|---|-----|--------------|------|--------|-----|----|----|
| 6915 | G | A | RNA | rs1603220687 | COX1 | P00395 | 338 | V  | M  |
| 6929 | A | G | RNA | NA           | NA   | NA     | NA  | NA | NA |
| 6932 | A | G | RNA | NA           | NA   | NA     | NA  | NA | NA |
| 6935 | C | T | RNA | NA           | NA   | NA     | NA  | NA | NA |
| 6938 | C | T | RNA | NA           | NA   | NA     | NA  | NA | NA |
| 6944 | T | C | RNA | NA           | NA   | NA     | NA  | NA | NA |
| 6950 | C | T | RNA | NA           | NA   | NA     | NA  | NA | NA |
| 6962 | G | A | RNA | NA           | NA   | NA     | NA  | NA | NA |
| 6965 | T | C | RNA | NA           | NA   | NA     | NA  | NA | NA |
| 6975 | T | C | RNA | NA           | NA   | NA     | NA  | NA | NA |
| 6990 | C | T | RNA | NA           | NA   | NA     | NA  | NA | NA |
| 7007 | C | T | RNA | NA           | NA   | NA     | NA  | NA | NA |
| 7008 | G | T | RNA | .            | COX1 | P00395 | 369 | D  | Y  |
| 7013 | G | A | RNA | NA           | NA   | NA     | NA  | NA | NA |
| 7016 | C | T | RNA | NA           | NA   | NA     | NA  | NA | NA |
| 7022 | T | C | RNA | NA           | NA   | NA     | NA  | NA | NA |
| 7037 | C | T | RNA | NA           | NA   | NA     | NA  | NA | NA |

|      |    |    |     |              |      |        |     |    |    |
|------|----|----|-----|--------------|------|--------|-----|----|----|
| 7040 | T  | C  | RNA | NA           | NA   | NA     | NA  | NA | NA |
| 7064 | T  | C  | RNA | NA           | NA   | NA     | NA  | NA | NA |
| 7072 | T  | C  | RNA | rs1603220760 | COX1 | P00395 | 390 | M  | T  |
| 7076 | A  | G  | RNA | NA           | NA   | NA     | NA  | NA | NA |
| 7094 | T  | C  | RNA | NA           | NA   | NA     | NA  | NA | NA |
| 7112 | C  | T  | RNA | NA           | NA   | NA     | NA  | NA | NA |
| 7133 | CA | C  | RNA | NA           | NA   | NA     | NA  | NA | NA |
| 7196 | C  | T  | RNA | NA           | NA   | NA     | NA  | NA | NA |
| 7205 | C  | T  | RNA | NA           | NA   | NA     | NA  | NA | NA |
| 7211 | G  | A  | RNA | NA           | NA   | NA     | NA  | NA | NA |
| 7244 | C  | T  | RNA | NA           | NA   | NA     | NA  | NA | NA |
| 7259 | CC | TT | RNA | NA           | NA   | NA     | NA  | NA | NA |
| 7424 | A  | G  | RNA | NA           | NA   | NA     | NA  | NA | NA |
| 7621 | T  | C  | RNA | NA           | NA   | NA     | NA  | NA | NA |
| 7861 | T  | C  | RNA | NA           | NA   | NA     | NA  | NA | NA |
| 7868 | C  | T  | RNA | rs1556423357 | COX2 | P00403 | 95  | L  | F  |
| 8011 | A  | G  | RNA | NA           | NA   | NA     | NA  | NA | NA |

|      |   |   |     |              |      |        |     |    |    |
|------|---|---|-----|--------------|------|--------|-----|----|----|
| 8021 | A | G | RNA | rs1603221261 | COX2 | P00403 | 146 | I  | V  |
| 8065 | G | A | RNA | NA           | NA   | NA     | NA  | NA | NA |
| 8140 | C | T | RNA | NA           | NA   | NA     | NA  | NA | NA |
| 8152 | G | A | RNA | NA           | NA   | NA     | NA  | NA | NA |
| 8167 | T | C | RNA | NA           | NA   | NA     | NA  | NA | NA |
| 8371 | C | A | INT | NA           | NA   | NA     | NA  | NA | NA |
| 8374 | A | G | INT | NA           | NA   | NA     | NA  | NA | NA |
| 8380 | T | C | INT | NA           | NA   | NA     | NA  | NA | NA |
| 8383 | T | C | INT | NA           | NA   | NA     | NA  | NA | NA |
| 8386 | C | T | INT | NA           | NA   | NA     | NA  | NA | NA |
| 8401 | A | C | INT | .            | ATP8 | P03928 | 12  | M  | I  |
| 8405 | A | G | INT | rs1603221462 | ATP8 | P03928 | 14  | T  | A  |
| 8410 | C | A | INT | NA           | NA   | NA     | NA  | NA | NA |
| 8416 | C | T | INT | NA           | NA   | NA     | NA  | NA | NA |
| 8419 | T | C | INT | NA           | NA   | NA     | NA  | NA | NA |
| 8428 | C | T | INT | NA           | NA   | NA     | NA  | NA | NA |
| 8437 | C | T | INT | NA           | NA   | NA     | NA  | NA | NA |



|      |    |    |     |              |      |        |    |    |    |
|------|----|----|-----|--------------|------|--------|----|----|----|
| 8440 | A  | G  | INT | NA           | NA   | NA     | NA | NA | NA |
| 8455 | C  | T  | INT | NA           | NA   | NA     | NA | NA | NA |
| 8461 | C  | T  | INT | NA           | NA   | NA     | NA | NA | NA |
| 8467 | C  | T  | INT | NA           | NA   | NA     | NA | NA | NA |
| 8473 | T  | C  | INT | NA           | NA   | NA     | NA | NA | NA |
| 8503 | T  | C  | RNA | NA           | NA   | NA     | NA | NA | NA |
| 8508 | AC | GT | RNA | NA           | NA   | NA     | NA | NA | NA |
| 8527 | A  | G  | RNA | rs878853003  | ATP6 | P00846 | 1  | M  | V  |
| 8558 | C  | G  | RNA | .            | ATP8 | P03928 | 65 | P  | A  |
| 8558 | C  | G  | RNA | .            | ATP6 | P00846 | 11 | A  | G  |
| 8566 | A  | G  | RNA | rs3020563    | ATP6 | P00846 | 14 | I  | V  |
| 8568 | C  | T  | RNA | rs1603221589 | ATP8 | P03928 | 68 | S  | F  |
| 8574 | C  | T  | RNA | NA           | NA   | NA     | NA | NA | NA |
| 8577 | A  | G  | RNA | NA           | NA   | NA     | NA | NA | NA |
| 8611 | C  | T  | RNA | NA           | NA   | NA     | NA | NA | NA |
| 8618 | T  | C  | RNA | rs28358885   | ATP6 | P00846 | 31 | I  | T  |
| 8632 | T  | C  | RNA | rs1603221654 | ATP6 | P00846 | 36 | Y  | H  |

|      |   |                |     |              |      |        |     |    |    |
|------|---|----------------|-----|--------------|------|--------|-----|----|----|
| 8634 | T | C              | RNA | NA           | NA   | NA     | NA  | NA | NA |
| 8655 | C | T              | RNA | NA           | NA   | NA     | NA  | NA | NA |
| 8658 | C | T              | RNA | NA           | NA   | NA     | NA  | NA | NA |
| 8677 | A | C              | RNA | .            | ATP6 | P00846 | 51  | K  | Q  |
| 8714 | C | T              | RNA | rs1603221724 | ATP6 | P00846 | 63  | T  | I  |
| 8721 | A | G              | RNA | NA           | NA   | NA     | NA  | NA | NA |
| 8775 | C | T              | RNA | NA           | NA   | NA     | NA  | NA | NA |
| 8778 | C | T              | RNA | NA           | NA   | NA     | NA  | NA | NA |
| 8784 | A | G              | RNA | NA           | NA   | NA     | NA  | NA | NA |
|      |   | TAC-           |     |              |      |        |     |    |    |
|      |   | GCCGAGGCCGCCGC |     |              |      |        |     |    |    |
| 8789 | T | CGCCGCCGCC     | RNA | NA           | NA   | NA     | NA  | NA | NA |
| 8793 | T | G              | RNA | NA           | NA   | NA     | NA  | NA | NA |
| 8795 | A | C              | RNA | .            | ATP6 | P00846 | 90  | H  | P  |
| 8848 | T | C              | RNA | NA           | NA   | NA     | NA  | NA | NA |
| 8850 | A | G              | RNA | NA           | NA   | NA     | NA  | NA | NA |
| 8854 | G | A              | RNA | rs386829055  | ATP6 | P00846 | 110 | A  | T  |

|      |    |    |     |              |      |        |     |    |    |
|------|----|----|-----|--------------|------|--------|-----|----|----|
| 8856 | G  | A  | RNA | NA           | NA   | NA     | NA  | NA | NA |
| 8859 | C  | T  | RNA | NA           | NA   | NA     | NA  | NA | NA |
| 8860 | A  | G  | RNA | rs2001031    | ATP6 | P00846 | 112 | T  | A  |
| 8865 | G  | A  | RNA | NA           | NA   | NA     | NA  | NA | NA |
| 8870 | T  | C  | RNA | rs1556423560 | ATP6 | P00846 | 115 | M  | T  |
| 8875 | T  | C  | RNA | rs201123510  | ATP6 | P00846 | 117 | F  | L  |
| 8877 | T  | C  | RNA | NA           | NA   | NA     | NA  | NA | NA |
| 8886 | G  | A  | RNA | NA           | NA   | NA     | NA  | NA | NA |
| 8888 | TT | CC | RNA | NA           | NA   | NA     | NA  | NA | NA |
| 9261 | A  | C  | RNA | .            | COX3 | P00414 | 19  | T  | P  |
| 9325 | T  | C  | RNA | rs879000531  | COX3 | P00414 | 40  | M  | T  |
| 9329 | G  | C  | RNA | NA           | NA   | NA     | NA  | NA | NA |
| 9527 | C  | T  | RNA | NA           | NA   | NA     | NA  | NA | NA |
| 9530 | T  | C  | RNA | NA           | NA   | NA     | NA  | NA | NA |
| 9692 | AC | GT | RNA | NA           | NA   | NA     | NA  | NA | NA |
| 9695 | G  | A  | RNA | NA           | NA   | NA     | NA  | NA | NA |
| 9713 | G  | A  | RNA | NA           | NA   | NA     | NA  | NA | NA |

|       |    |    |     |             |      |        |     |    |    |
|-------|----|----|-----|-------------|------|--------|-----|----|----|
| 9717  | C  | G  | RNA | .           | COX3 | P00414 | 171 | L  | V  |
| 9719  | C  | T  | RNA | NA          | NA   | NA     | NA  | NA | NA |
| 9722  | T  | C  | RNA | NA          | NA   | NA     | NA  | NA | NA |
| 9785  | C  | T  | RNA | NA          | NA   | NA     | NA  | NA | NA |
| 9839  | C  | A  | RNA | NA          | NA   | NA     | NA  | NA | NA |
| 9857  | C  | T  | RNA | NA          | NA   | NA     | NA  | NA | NA |
| 9861  | T  | C  | RNA | rs878853060 | COX3 | P00414 | 219 | F  | L  |
| 9877  | T  | A  | RNA | .           | COX3 | P00414 | 224 | M  | K  |
| 9880  | T  | A  | RNA | .           | COX3 | P00414 | 225 | F  | Y  |
| 9893  | C  | T  | RNA | NA          | NA   | NA     | NA  | NA | NA |
| 9896  | A  | C  | RNA | .           | COX3 | P00414 | 230 | K  | N  |
| 9911  | CG | TA | RNA | NA          | NA   | NA     | NA  | NA | NA |
| 9924  | T  | G  | RNA | .           | COX3 | P00414 | 240 | W  | G  |
| 9929  | C  | T  | RNA | NA          | NA   | NA     | NA  | NA | NA |
| 10308 | C  | T  | INT | NA          | NA   | NA     | NA  | NA | NA |
| 10310 | G  | A  | INT | NA          | NA   | NA     | NA  | NA | NA |
| 10377 | C  | T  | INT | NA          | NA   | NA     | NA  | NA | NA |

|       |    |    |     |              |       |        |    |    |    |
|-------|----|----|-----|--------------|-------|--------|----|----|----|
| 10380 | C  | T  | INT | NA           | NA    | NA     | NA | NA | NA |
| 10388 | A  | G  | INT | NA           | NA    | NA     | NA | NA | NA |
| 10417 | T  | C  | INT | NA           | NA    | NA     | NA | NA | NA |
| 10589 | G  | A  | RNA | NA           | NA    | NA     | NA | NA | NA |
| 10646 | G  | A  | RNA | NA           | NA    | NA     | NA | NA | NA |
| 10652 | TG | CA | RNA | NA           | NA    | NA     | NA | NA | NA |
| 10667 | T  | C  | RNA | NA           | NA    | NA     | NA | NA | NA |
| 10670 | C  | T  | RNA | NA           | NA    | NA     | NA | NA | NA |
| 10677 | G  | A  | RNA | rs1603222944 | NU4LM | P03901 | 70 | E  | K  |
| 10679 | A  | G  | RNA | NA           | NA    | NA     | NA | NA | NA |
| 10685 | G  | A  | RNA | NA           | NA    | NA     | NA | NA | NA |
| 10750 | A  | G  | RNA | rs372297272  | NU4LM | P03901 | 94 | N  | S  |
| 10775 | G  | A  | RNA | rs879015842  | NU4M  | P03905 | 6  | V  | I  |
| 10786 | T  | C  | RNA | NA           | NA    | NA     | NA | NA | NA |
| 10801 | G  | A  | RNA | NA           | NA    | NA     | NA | NA | NA |
| 10808 | C  | T  | RNA | rs2068723560 | NU4M  | P03905 | 17 | L  | F  |
| 10810 | T  | C  | RNA | NA           | NA    | NA     | NA | NA | NA |

|       |    |    |     |              |      |        |     |    |    |
|-------|----|----|-----|--------------|------|--------|-----|----|----|
| 10816 | A  | G  | RNA | NA           | NA   | NA     | NA  | NA | NA |
| 10846 | C  | T  | RNA | NA           | NA   | NA     | NA  | NA | NA |
| 10866 | T  | C  | RNA | rs1603222994 | NU4M | P03905 | 36  | I  | T  |
| 10972 | A  | C  | RNA | .            | NU4M | P03905 | 71  | W  | C  |
| 10978 | A  | C  | RNA | NA           | NA   | NA     | NA  | NA | NA |
| 11107 | C  | T  | RNA | NA           | NA   | NA     | NA  | NA | NA |
| 11113 | T  | C  | RNA | NA           | NA   | NA     | NA  | NA | NA |
| 11116 | T  | C  | RNA | NA           | NA   | NA     | NA  | NA | NA |
| 11129 | A  | G  | RNA | rs1603223122 | NU4M | P03905 | 124 | T  | A  |
| 11134 | A  | G  | RNA | NA           | NA   | NA     | NA  | NA | NA |
| 11137 | TA | AG | RNA | NA           | NA   | NA     | NA  | NA | NA |
| 11710 | C  | T  | RNA | NA           | NA   | NA     | NA  | NA | NA |
| 11719 | G  | A  | RNA | NA           | NA   | NA     | NA  | NA | NA |
| 11731 | A  | C  | RNA | NA           | NA   | NA     | NA  | NA | NA |
| 11767 | C  | T  | RNA | NA           | NA   | NA     | NA  | NA | NA |
| 11770 | T  | C  | RNA | NA           | NA   | NA     | NA  | NA | NA |
| 11788 | C  | T  | RNA | NA           | NA   | NA     | NA  | NA | NA |

|       |   |   |     |             |      |        |     |    |    |
|-------|---|---|-----|-------------|------|--------|-----|----|----|
| 11887 | G | A | RNA | NA          | NA   | NA     | NA  | NA | NA |
| 11953 | C | T | RNA | NA          | NA   | NA     | NA  | NA | NA |
| 11963 | G | A | RNA | rs201803948 | NU4M | P03905 | 402 | V  | I  |
| 12064 | C | T | RNA | NA          | NA   | NA     | NA  | NA | NA |
| 12088 | C | T | RNA | NA          | NA   | NA     | NA  | NA | NA |
| 12091 | T | C | RNA | NA          | NA   | NA     | NA  | NA | NA |
| 12115 | C | T | RNA | NA          | NA   | NA     | NA  | NA | NA |
| 12136 | T | C | RNA | NA          | NA   | NA     | NA  | NA | NA |
| 12218 | C | T | INT | NA          | NA   | NA     | NA  | NA | NA |
| 12341 | C | A | RNA | .           | NU5M | P03915 | 2   | T  | N  |
| 12346 | C | T | RNA | .           | NU5M | P03915 | 4   | H  | Y  |
| 12360 | C | A | RNA | NA          | NA   | NA     | NA  | NA | NA |
| 12368 | C | T | RNA | .           | NU5M | P03915 | 11  | T  | I  |
| 12390 | C | T | RNA | NA          | NA   | NA     | NA  | NA | NA |
| 12403 | C | T | RNA | .           | NU5M | P03915 | 23  | L  | F  |
| 12684 | G | A | RNA | NA          | NA   | NA     | NA  | NA | NA |
| 12687 | C | T | RNA | NA          | NA   | NA     | NA  | NA | NA |

|       |   |   |     |    |      |        |     |    |    |
|-------|---|---|-----|----|------|--------|-----|----|----|
| 12702 | C | T | RNA | NA | NA   | NA     | NA  | NA | NA |
| 12714 | T | C | RNA | NA | NA   | NA     | NA  | NA | NA |
| 12750 | C | T | RNA | NA | NA   | NA     | NA  | NA | NA |
| 12786 | A | G | RNA | NA | NA   | NA     | NA  | NA | NA |
| 12789 | C | T | RNA | NA | NA   | NA     | NA  | NA | NA |
| 12793 | T | C | RNA | NA | NA   | NA     | NA  | NA | NA |
| 12802 | A | G | RNA | .  | NU5M | P03915 | 156 | S  | G  |
| 12825 | T | C | RNA | NA | NA   | NA     | NA  | NA | NA |
| 12873 | T | C | RNA | NA | NA   | NA     | NA  | NA | NA |
| 12879 | T | C | RNA | NA | NA   | NA     | NA  | NA | NA |
| 12892 | T | C | RNA | NA | NA   | NA     | NA  | NA | NA |
| 13020 | T | C | RNA | NA | NA   | NA     | NA  | NA | NA |
| 13034 | T | C | RNA | .  | NU5M | P03915 | 233 | L  | P  |
| 13062 | A | G | RNA | NA | NA   | NA     | NA  | NA | NA |
| 13095 | T | C | RNA | NA | NA   | NA     | NA  | NA | NA |
| 13118 | T | A | RNA | .  | NU5M | P03915 | 261 | I  | N  |
| 13132 | C | T | RNA | NA | NA   | NA     | NA  | NA | NA |



|       |    |    |     |    |      |        |     |    |    |
|-------|----|----|-----|----|------|--------|-----|----|----|
| 13145 | G  | A  | RNA | .  | NU5M | P03915 | 270 | S  | N  |
| 13164 | A  | C  | RNA | NA | NA   | NA     | NA  | NA | NA |
| 13191 | T  | C  | RNA | NA | NA   | NA     | NA  | NA | NA |
| 13197 | C  | T  | RNA | NA | NA   | NA     | NA  | NA | NA |
| 13215 | T  | C  | RNA | NA | NA   | NA     | NA  | NA | NA |
| 13226 | A  | C  | RNA | .  | NU5M | P03915 | 297 | D  | A  |
| 13227 | C  | T  | RNA | NA | NA   | NA     | NA  | NA | NA |
| 13242 | A  | G  | RNA | NA | NA   | NA     | NA  | NA | NA |
| 13251 | C  | T  | RNA | NA | NA   | NA     | NA  | NA | NA |
| 13260 | T  | C  | RNA | NA | NA   | NA     | NA  | NA | NA |
| 13264 | C  | T  | RNA | NA | NA   | NA     | NA  | NA | NA |
| 13272 | C  | T  | RNA | NA | NA   | NA     | NA  | NA | NA |
| 13275 | AA | GG | RNA | NA | NA   | NA     | NA  | NA | NA |
| 13281 | T  | C  | RNA | NA | NA   | NA     | NA  | NA | NA |
| 13303 | C  | T  | RNA | .  | NU5M | P03915 | 323 | H  | Y  |
| 13359 | G  | A  | RNA | NA | NA   | NA     | NA  | NA | NA |
| 13386 | T  | C  | RNA | NA | NA   | NA     | NA  | NA | NA |

|       |   |    |     |    |      |        |     |    |    |
|-------|---|----|-----|----|------|--------|-----|----|----|
| 13466 | G | A  | RNA | .  | NU5M | P03915 | 377 | S  | N  |
| 13474 | T | C  | RNA | NA | NA   | NA     | NA  | NA | NA |
| 13476 | A | T  | RNA | .  | NU5M | P03915 | 380 | L  | F  |
| 13476 | A | G  | RNA | NA | NA   | NA     | NA  | NA | NA |
| 13488 | T | C  | RNA | NA | NA   | NA     | NA  | NA | NA |
| 13517 | A | T  | RNA | .  | NU5M | P03915 | 394 | H  | L  |
| 13548 | A | C  | RNA | NA | NA   | NA     | NA  | NA | NA |
| 13581 | T | C  | RNA | NA | NA   | NA     | NA  | NA | NA |
| 13584 | C | T  | RNA | NA | NA   | NA     | NA  | NA | NA |
| 13600 | T | A  | RNA | .  | NU5M | P03915 | 422 | Y  | N  |
| 13614 | A | T  | RNA | .  | NU5M | P03915 | 426 | M  | I  |
| 13618 | C | T  | RNA | .  | NU5M | P03915 | 428 | L  | F  |
| 13627 | C | T  | RNA | NA | NA   | NA     | NA  | NA | NA |
| 13635 | T | C  | RNA | NA | NA   | NA     | NA  | NA | NA |
| 13635 | T | A  | RNA | NA | NA   | NA     | NA  | NA | NA |
| 13636 | C | CA | RNA | NA | NA   | NA     | NA  | NA | NA |
| 13650 | C | A  | RNA | NA | NA   | NA     | NA  | NA | NA |

|       |   |   |     |              |      |        |     |    |    |
|-------|---|---|-----|--------------|------|--------|-----|----|----|
| 13651 | A | G | RNA | rs1569484594 | NU5M | P03915 | 439 | T  | A  |
| 13674 | T | C | RNA | NA           | NA   | NA     | NA  | NA | NA |
| 13763 | C | A | RNA | .            | NU5M | P03915 | 476 | S  | Y  |
| 13804 | G | A | RNA | rs1603224360 | NU5M | P03915 | 490 | A  | T  |
| 13816 | A | C | RNA | .            | NU5M | P03915 | 494 | T  | P  |
| 13886 | T | C | RNA | rs28359182   | NU5M | P03915 | 517 | L  | P  |
| 13908 | C | T | RNA | NA           | NA   | NA     | NA  | NA | NA |
| 14149 | C | T | RNA | NA           | NA   | NA     | NA  | NA | NA |
| 14170 | A | T | RNA | .            | NU6M | P03923 | 168 | I  | M  |
| 14172 | T | G | RNA | .            | NU6M | P03923 | 168 | I  | L  |
| 14182 | T | C | RNA | NA           | NA   | NA     | NA  | NA | NA |
| 14280 | A | G | RNA | .            | NU6M | P03923 | 132 | S  | P  |
| 14305 | G | A | RNA | NA           | NA   | NA     | NA  | NA | NA |
| 14311 | T | C | RNA | NA           | NA   | NA     | NA  | NA | NA |
| 14323 | G | A | RNA | NA           | NA   | NA     | NA  | NA | NA |
| 14362 | C | T | RNA | NA           | NA   | NA     | NA  | NA | NA |
| 14364 | G | A | RNA | NA           | NA   | NA     | NA  | NA | NA |

|       |    |    |     |              |      |        |    |    |    |
|-------|----|----|-----|--------------|------|--------|----|----|----|
| 14368 | C  | T  | RNA | NA           | NA   | NA     | NA | NA | NA |
| 14467 | A  | G  | RNA | NA           | NA   | NA     | NA | NA | NA |
| 14470 | T  | C  | RNA | NA           | NA   | NA     | NA | NA | NA |
| 14494 | T  | C  | RNA | NA           | NA   | NA     | NA | NA | NA |
| 14524 | A  | G  | RNA | NA           | NA   | NA     | NA | NA | NA |
| 14536 | AA | GT | RNA | NA           | NA   | NA     | NA | NA | NA |
| 14562 | C  | T  | RNA | .            | NU6M | P03923 | 38 | V  | I  |
| 14608 | C  | T  | RNA | NA           | NA   | NA     | NA | NA | NA |
| 14668 | CA | TG | RNA | NA           | NA   | NA     | NA | NA | NA |
| 14757 | T  | C  | RNA | rs1603224859 | CYB  | P00156 | 4  | M  | T  |
| 14774 | C  | T  | RNA | NA           | NA   | NA     | NA | NA | NA |
| 14776 | A  | G  | RNA | NA           | NA   | NA     | NA | NA | NA |
| 14793 | A  | G  | RNA | rs2853504    | CYB  | P00156 | 16 | H  | R  |
| 14798 | T  | C  | RNA | rs28357681   | CYB  | P00156 | 18 | F  | L  |
| 14800 | C  | T  | RNA | NA           | NA   | NA     | NA | NA | NA |
| 14854 | C  | T  | RNA | NA           | NA   | NA     | NA | NA | NA |
| 14860 | C  | T  | RNA | NA           | NA   | NA     | NA | NA | NA |

|       |    |    |     |             |     |        |     |    |    |
|-------|----|----|-----|-------------|-----|--------|-----|----|----|
| 14871 | T  | C  | RNA | rs28660155  | CYB | P00156 | 42  | I  | T  |
| 14873 | C  | A  | RNA | .           | CYB | P00156 | 43  | L  | I  |
| 14875 | C  | T  | RNA | NA          | NA  | NA     | NA  | NA | NA |
| 14881 | C  | G  | RNA | .           | CYB | P00156 | 45  | I  | M  |
| 14883 | CC | TT | RNA | NA          | NA  | NA     | NA  | NA | NA |
| 14911 | C  | A  | RNA | NA          | NA  | NA     | NA  | NA | NA |
| 14923 | C  | T  | RNA | NA          | NA  | NA     | NA  | NA | NA |
| 14935 | T  | C  | RNA | NA          | NA  | NA     | NA  | NA | NA |
| 14941 | A  | G  | RNA | NA          | NA  | NA     | NA  | NA | NA |
| 14998 | C  | T  | RNA | NA          | NA  | NA     | NA  | NA | NA |
| 15019 | T  | C  | RNA | NA          | NA  | NA     | NA  | NA | NA |
| 15043 | G  | C  | RNA | NA          | NA  | NA     | NA  | NA | NA |
| 15061 | A  | C  | RNA | NA          | NA  | NA     | NA  | NA | NA |
| 15074 | TC | CT | RNA | NA          | NA  | NA     | NA  | NA | NA |
| 15077 | G  | A  | RNA | rs201943501 | CYB | P00156 | 111 | E  | K  |
| 15298 | CT | TC | RNA | NA          | NA  | NA     | NA  | NA | NA |
| 15346 | G  | A  | RNA | NA          | NA  | NA     | NA  | NA | NA |

|       |    |    |     |              |     |        |     |    |    |
|-------|----|----|-----|--------------|-----|--------|-----|----|----|
| 15596 | G  | A  | RNA | rs1603225369 | CYB | P00156 | 284 | V  | I  |
| 15598 | C  | T  | RNA | NA           | NA  | NA     | NA  | NA | NA |
| 15601 | T  | C  | RNA | NA           | NA  | NA     | NA  | NA | NA |
| 15604 | C  | T  | RNA | NA           | NA  | NA     | NA  | NA | NA |
| 15617 | G  | A  | RNA | rs1556424625 | CYB | P00156 | 291 | V  | I  |
| 15619 | C  | T  | RNA | NA           | NA  | NA     | NA  | NA | NA |
| 15622 | T  | A  | RNA | NA           | NA  | NA     | NA  | NA | NA |
| 15622 | T  | C  | RNA | NA           | NA  | NA     | NA  | NA | NA |
| 15628 | AT | TC | RNA | NA           | NA  | NA     | NA  | NA | NA |
| 15653 | AT | GC | RNA | NA           | NA  | NA     | NA  | NA | NA |
| 15658 | C  | T  | RNA | NA           | NA  | NA     | NA  | NA | NA |
| 15661 | C  | T  | RNA | NA           | NA  | NA     | NA  | NA | NA |
| 15664 | C  | A  | RNA | rs1603225414 | CYB | P00156 | 306 | I  | M  |
| 15699 | G  | A  | RNA | .            | CYB | P00156 | 318 | R  | H  |
| 15704 | C  | T  | RNA | NA           | NA  | NA     | NA  | NA | NA |
| 15714 | CA | TC | RNA | NA           | NA  | NA     | NA  | NA | NA |
| 15718 | T  | A  | RNA | NA           | NA  | NA     | NA  | NA | NA |

|       |      |      |     |              |     |        |     |    |    |
|-------|------|------|-----|--------------|-----|--------|-----|----|----|
| 15725 | C    | T    | RNA | rs1603225438 | CYB | P00156 | 327 | L  | F  |
| 15734 | G    | A    | RNA | rs386829259  | CYB | P00156 | 330 | A  | T  |
| 15745 | C    | T    | RNA | NA           | NA  | NA     | NA  | NA | NA |
| 15747 | TT   | CC   | RNA | NA           | NA  | NA     | NA  | NA | NA |
| 15760 | C    | T    | RNA | NA           | NA  | NA     | NA  | NA | NA |
| 15775 | A    | G    | RNA | NA           | NA  | NA     | NA  | NA | NA |
| 15777 | G    | A    | RNA | rs879182710  | CYB | P00156 | 344 | S  | N  |
| 15786 | T    | TCAC | RNA | NA           | NA  | NA     | NA  | NA | NA |
| 15793 | CATT | C    | RNA | NA           | NA  | NA     | NA  | NA | NA |
| 15812 | G    | A    | RNA | rs200336777  | CYB | P00156 | 356 | V  | M  |
| 15924 | A    | G    | RNA | NA           | NA  | NA     | NA  | NA | NA |
| 16034 | G    | A    | RNA | NA           | NA  | NA     | NA  | NA | NA |
| 16035 | G    | A    | RNA | NA           | NA  | NA     | NA  | NA | NA |
| 16036 | G    | A    | RNA | NA           | NA  | NA     | NA  | NA | NA |
| 16093 | T    | C    | RNA | NA           | NA  | NA     | NA  | NA | NA |
| 16124 | T    | C    | RNA | NA           | NA  | NA     | NA  | NA | NA |
| 16218 | C    | T    | RNA | NA           | NA  | NA     | NA  | NA | NA |

|       |    |    |     |    |    |    |    |    |    |
|-------|----|----|-----|----|----|----|----|----|----|
| 16230 | A  | G  | RNA | NA | NA | NA | NA | NA | NA |
| 16249 | T  | C  | RNA | NA | NA | NA | NA | NA | NA |
| 16257 | C  | CA | RNA | NA | NA | NA | NA | NA | NA |
| 16263 | TC | T  | RNA | NA | NA | NA | NA | NA | NA |
| 16265 | A  | T  | RNA | NA | NA | NA | NA | NA | NA |
| 16284 | A  | G  | RNA | NA | NA | NA | NA | NA | NA |
| 16288 | T  | C  | RNA | NA | NA | NA | NA | NA | NA |
| 16290 | C  | T  | RNA | NA | NA | NA | NA | NA | NA |
| 16293 | A  | C  | RNA | NA | NA | NA | NA | NA | NA |
| 16293 | A  | G  | RNA | NA | NA | NA | NA | NA | NA |
| 16301 | C  | T  | RNA | NA | NA | NA | NA | NA | NA |



**Supplementary Table S9:** List of the variants associated to diseases.

| Pos  | Ref | Alt | Csq | dbSNP155 | Disease_clinvar          | Disease_Mitomap            | Disease_Mitimpact |
|------|-----|-----|-----|----------|--------------------------|----------------------------|-------------------|
|      |     |     |     | id       |                          |                            |                   |
| 310  | T   | TC  | INT |          | Melanoma patients        |                            |                   |
| 921  | T   | C   | INT |          | Possibly LVNC associated |                            |                   |
| 1291 | T   | C   | INT |          | Maternally               | inherited                  | Deafness          |
|      |     |     |     |          | DEAFness or aminoglyco-  | nonsyndromic_sensorineural |                   |
|      |     |     |     |          | side-induced             | DEAFness                   | mitochondrial     |
|      |     |     |     |          | (DEAF)                   |                            |                   |
| 1310 | C   | T   | INT |          | Maternally               | inherited                  |                   |
|      |     |     |     |          | DEAFness                 | associated                 | or                |
|      |     |     |     |          | aminoglycoside-induced   |                            |                   |
|      |     |     |     |          | DEAFness                 | associated                 |                   |
|      |     |     |     |          | (DEAF associated)        |                            |                   |
| 1391 | T   | C   | INT |          | found in 1 Hypertrophic  |                            |                   |
|      |     |     |     |          | CardioMyopathy (HCM)     |                            |                   |
|      |     |     |     |          | patient                  |                            |                   |

|      |   |   |     |                                                                                         |
|------|---|---|-----|-----------------------------------------------------------------------------------------|
| 1453 | A | G | INT | Possible Maternally inherited DEAFness or aminoglycoside-induced DEAFness (DEAF) factor |
| 1556 | C | T | INT | found in 1 Hypertrophic CardioMyopathy (HCM) patient                                    |
| 1642 | G | A | INT | Mitochondrial Encephalomyopathy, Lactic Acidosis, and Stroke-like episodes (MELAS)      |
| 1654 | T | C | INT | Juvenile_myopathy<br>encephalopathy<br>lactic_acidosis_AND_stroke                       |
| 1657 | C | T | INT | Juvenile_myopathy<br>encephalopathy<br>lactic_acidosis_AND_stroke                       |

|      |   |   |     |                                                                                             |                                                                                                                    |
|------|---|---|-----|---------------------------------------------------------------------------------------------|--------------------------------------------------------------------------------------------------------------------|
| 1664 | G | A | INT |                                                                                             | Juvenile_myopathy<br>encephalopathy<br>lactic_acidosis_AND_stroke                                                  |
| 2361 | G | A | RNA | Possibly LVNC associated                                                                    |                                                                                                                    |
| 2639 | C | A | RNA | Rare mutation in a single<br>Primary Open Angle Glau-<br>coma (POAG) patient                |                                                                                                                    |
| 3250 | T | C | RNA | Chronic Progressive Exter-<br>nal Ophthalmoplegia<br>(CPEO), Mitochondrial<br>Myopathy (MM) | Juvenile_myopathy<br>encephalopathy<br>lactic_acidosis_AND_stroke<br>Skeletal_myopathy<br>responsive_to_riboflavin |
| 3253 | T | C | RNA | Maternally inherited hy-<br>pertension                                                      |                                                                                                                    |
| 3254 | C | T | RNA | Gestational Diabetes<br>(GDM), Chronic Progres-                                             | Juvenile_myopathy<br>encephalopathy<br>lactic_acidosis_AND_stroke                                                  |

sive External Ophthalmoplegia (CPEO), possible hypertension factor, Mitochondrial Myopathy (MM)

3263 C T RNA

Juvenile\_myopathy

encephalopathy

lactic\_acidosis\_AND\_stroke

3275 C T RNA

Leber Hereditary Optic Myopia\_(disease)

Neuropathy (LHON), Metabolic syndrome and poly-

Leber's\_optic\_atrophy

cystic ovary syndrome

Hepatic\_steatosis

Hepatitis

Juvenile\_myopathy

encephalopathy

lactic\_acidosis\_AND\_stroke

Neuromuscular\_disease

|      |   |   |     |                                                                                               |                                                                   |
|------|---|---|-----|-----------------------------------------------------------------------------------------------|-------------------------------------------------------------------|
|      |   |   |     |                                                                                               | Fibrosis                                                          |
|      |   |   |     |                                                                                               | Developmental_delay                                               |
| 3277 | G | A | RNA | Possible hypertension factor                                                                  | Juvenile_myopathy<br>encephalopathy<br>lactic_acidosis_AND_stroke |
| 5262 | G | A | RNA |                                                                                               | Leigh_syndrome                                                    |
| 5806 | T | C | INT |                                                                                               | Juvenile_myopathy<br>encephalopathy<br>lactic_acidosis_AND_stroke |
| 5821 | G | A | INT | Maternally inherited<br>DEAFness or aminoglycoside-induced DEAFness<br>(DEAF) helper mutation | Juvenile_myopathy<br>encephalopathy<br>lactic_acidosis_AND_stroke |
| 5840 | C | T | INT |                                                                                               | Juvenile_myopathy<br>encephalopathy<br>lactic_acidosis_AND_stroke |

|      |   |   |     |              |                                                     |                                                                   |                                               |
|------|---|---|-----|--------------|-----------------------------------------------------|-------------------------------------------------------------------|-----------------------------------------------|
| 5846 | C | T | INT |              |                                                     | Juvenile_myopathy<br>encephalopathy<br>lactic_acidosis_AND_stroke |                                               |
| 6915 | G | A | RNA | rs1603220687 |                                                     | Leigh_syndrome                                                    |                                               |
| 6962 | G | A | RNA |              | Possible helper variant for<br>15927A               |                                                                   |                                               |
| 7868 | C | T | RNA | rs1556423357 | Leber Hereditary Optic<br>Neuropathy (LHON)         | Leigh_syndrome                                                    | Leber Hereditary Optic Neurop-<br>athy (LHON) |
| 8021 | A | G | RNA | rs1603221261 | Asthenozoospermia                                   | Leigh_syndrome                                                    | Asthenozoospermia                             |
| 8527 | A | G | RNA | rs878853003  | Neuromuscular disorder+<br>possible helper mutation | Leigh_syndrome                                                    |                                               |
| 8566 | A | G | RNA | rs3020563    |                                                     | Leigh_syndrome                                                    |                                               |
| 8618 | T | C | RNA | rs28358885   |                                                     | Leigh_syndrome                                                    |                                               |
| 8632 | T | C | RNA | rs1603221654 |                                                     | Leigh_syndrome                                                    |                                               |
| 8714 | C | T | RNA | rs1603221724 |                                                     | Leigh_syndrome                                                    |                                               |
| 8854 | G | A | RNA | rs386829055  |                                                     | Leigh_syndrome                                                    |                                               |
| 8860 | A | G | RNA | rs2001031    |                                                     | Leigh_syndrome                                                    |                                               |

|       |   |   |     |              |                          |                |                          |
|-------|---|---|-----|--------------|--------------------------|----------------|--------------------------|
| 8870  | T | C | RNA | rs1556423560 |                          | Leigh_syndrome |                          |
| 8875  | T | C | RNA | rs201123510  |                          | Leigh_syndrome |                          |
| 9325  | T | C | RNA | rs879000531  |                          | Leigh_syndrome |                          |
| 9861  | T | C | RNA | rs878853060  | Alzheimer's Disease (AD) | Leigh_syndrome | Alzheimer's Disease (AD) |
| 10677 | G | A | RNA | rs1603222944 |                          | Leigh_syndrome |                          |
| 10750 | A | G | RNA | rs372297272  |                          | Leigh_syndrome |                          |
| 10775 | G | A | RNA | rs879015842  |                          | Leigh_syndrome |                          |
| 11129 | A | G | RNA | rs1603223122 |                          | Leigh_syndrome |                          |
| 11963 | G | A | RNA | rs201803948  |                          | Leigh_syndrome |                          |
| 12346 | C | T | RNA |              |                          | Leigh_syndrome |                          |
| 12403 | C | T | RNA |              |                          | Leigh_syndrome |                          |
| 13145 | G | A | RNA |              |                          | Leigh_syndrome |                          |
| 13466 | G | A | RNA |              |                          | Leigh_syndrome |                          |
| 13651 | A | G | RNA | rs1569484594 |                          | Leigh_syndrome |                          |
| 13886 | T | C | RNA | rs28359182   |                          | Leigh_syndrome |                          |
| 14280 | A | G | RNA |              |                          | Leigh_syndrome |                          |
| 14562 | C | T | RNA |              |                          | Leigh_syndrome |                          |

|       |   |   |     |              |                                                                                                                                                            |                                                                                                                  |
|-------|---|---|-----|--------------|------------------------------------------------------------------------------------------------------------------------------------------------------------|------------------------------------------------------------------------------------------------------------------|
| 14757 | T | C | RNA | rs1603224859 | Leigh_syndrome                                                                                                                                             |                                                                                                                  |
| 14793 | A | G | RNA | rs2853504    | Leigh_syndrome                                                                                                                                             |                                                                                                                  |
| 14798 | T | C | RNA | rs28357681   | Leigh_syndrome                                                                                                                                             |                                                                                                                  |
| 14800 | C | T | RNA |              | Familial_cancer_of_breast                                                                                                                                  |                                                                                                                  |
| 14854 | C | T | RNA |              | Mitochondrial_cytopathy                                                                                                                                    |                                                                                                                  |
| 14871 | T | C | RNA | rs28660155   | Leigh_syndrome                                                                                                                                             |                                                                                                                  |
| 14935 | T | C | RNA |              | Familial_cancer_of_breast                                                                                                                                  |                                                                                                                  |
| 15077 | G | A | RNA | rs201943501  | Leber Hereditary Optic Neuropathy (LHON), Maternally inherited DEAFness or aminoglycoside-induced DEAFness / Leber Hereditary Optic Neuropathy (DEAF/LHON) | Maternally inherited DEAFness or aminoglycoside-induced DEAFness / Leber Hereditary Optic Neuropathy (DEAF/LHON) |
| 15346 | G | A | RNA |              | Familial_cancer_of_breast                                                                                                                                  |                                                                                                                  |
| 15596 | G | A | RNA | rs1603225369 | Leigh_syndrome                                                                                                                                             |                                                                                                                  |
| 15617 | G | A | RNA | rs1556424625 | Leigh_syndrome                                                                                                                                             |                                                                                                                  |
| 15664 | C | A | RNA | rs1603225414 | Leigh_syndrome                                                                                                                                             |                                                                                                                  |
| 15725 | C | T | RNA | rs1603225438 | Leigh_syndrome                                                                                                                                             |                                                                                                                  |



|       |   |   |     |             |                                                |                                                                   |                                          |
|-------|---|---|-----|-------------|------------------------------------------------|-------------------------------------------------------------------|------------------------------------------|
| 15734 | G | A | RNA | rs386829259 |                                                | Leigh_syndrome                                                    |                                          |
| 15777 | G | A | RNA | rs879182710 |                                                | Leigh_syndrome                                                    |                                          |
| 15812 | G | A | RNA | rs200336777 | Leber Hereditary Optic Neuropathy (LHON)       | Leber's_optic_atrophy<br>Leigh_syndrome                           | Leber Hereditary Optic Neuropathy (LHON) |
| 15924 | A | G | RNA |             | Lethal Infantile Mitochondrial Myopathy (LIMM) | Juvenile_myopathy<br>encephalopathy<br>lactic_acidosis_AND_stroke |                                          |
| 16093 | T | C | RNA |             | Cyclic Vomiting Syndrome                       |                                                                   |                                          |

---

27

28

29

30

31
